# Supplementary material for: Universal diamond edge Raman scale to 0.5 terapascal and implications for the metallization of hydrogen
Source: Nat Commun. 2023 Feb 17;14:907. doi: 10.1038/s41467-023-36429-9 (PMC9938121; doi:10.1038/s41467-023-36429-9)
Supplement: Supplementary file 2 — Source Data [file 41467_2023_36429_MOESM2_ESM.xlsx]

## Sheet: Content
Source Data
Universal diamond edge Raman scale to 0.5 terapascal and implications for the metallization of hydrogen
M. I. Eremets1*, V. S. Minkov1, P. P. Kong1, A. P. Drozdov1, S. Chariton2, V. B. Prakapenka2
1Max Planck Institute for Chemistry; Hahn Meitner Weg 1, Mainz, 55128, Germany
2Center for Advanced Radiation Sources, University of Chicago; 5640 South Ellis Avenue, Chicago, Illinois, 60637, USA
*Corresponding author. Email: m.eremets@mpic.de
The Source Data file contains the relevant raw data from each figure and table (in the main manuscript and in the Supplementary Information), which are represented by a single sheet in the present Excel document.
Figures 1 to 4
Supplementary Figures 1 to 6, 8, 9
Supplementary Table 1

## Sheet: Figure 1
Figure 1a				Figure 1b				Figure 1c					Figure 1d
	Black data (XRD)				Black data (Raman)				Black points*					Black points*
	2 theta (deg)	Intensity (arb. Units)			Raman shift (cm^-1)	Intensity (arb. Units)			Distance (mm)	Distance (mm)	Pressure (GPa)			Distance (mm)	Distance (mm)	Pressure (GPa)
	6.98574	1.25189			1197.85	607.9			2	-1	296.6			0	0	301.7
	7.00284	1.2313			1200.38	607.172			4	-1	306.7			2	0	312.5
	7.01993	2.11136			1202.91	609.354			6	-1	323.3			4	0	323.3
	7.03703	2.6614			1205.44	607.445			8	-1	337.9			6	0	334.3
	7.05412	1.99956			1207.97	608.809			10	-1	345.2			8	0	349.8
	7.07122	1.36669			1210.49	607.445			12	-1	347.9			10	0	355
	7.08831	0.56864			1213.02	607.809			14	-1	354.3			12	0	359.4
	7.1054	0.89452			1215.54	608.354			16	-1	340.6			14	0	363.8
	7.1225	1.24888			1218.07	608.354			18	-1	296.6			16	0	349.8
	7.13959	0.9923			1220.59	608.991			20	-1	266.9			18	0	331.8
	7.15669	1.15971			1223.11	608.991			22	-1	263.2			20	0	308.3
	7.17378	0.6548			1225.63	608.809			2	1	310.4			0	2	316.6
	7.19088	0.66805			1228.15	609.172			4	1	321.4			2	2	327.5
	7.20797	0.94944			1230.67	607.991			6	1	337			4	2	342.9
	7.22506	1.84245			1233.19	608.081			8	1	349.7			6	2	348
	7.24216	1.66755			1235.7	608.991			10	1	359.7			8	2	362.9
	7.25925	1.24183			1238.22	608.9			12	1	373.3			10	2	374.4
	7.27635	0.52599			1240.74	607.9			14	1	380.5			12	2	379.8
	7.29344	0.65367			1243.25	608.809			16	1	370.6			14	2	382.4
	7.31054	1.37564			1245.76	608.627			18	1	327.8			16	2	373.5
	7.32763	1.96729			1248.28	608.354			20	1	280.9			18	2	352.4
	7.34472	1.60613			1250.79	606.627			22	1	266.9			20	2	326.7
	7.36182	1.39569			1253.3	608.263			2	3	336.1			0	4	325.8
	7.37891	1.71653			1255.81	608.172			4	3	353.4			2	4	348.9
	7.39601	2.18921			1258.32	609.172			6	3	365.2			4	4	369.1
	7.4131	1.80708			1260.82	607.627			8	3	378.7			6	4	386
	7.4302	1.47956			1263.33	608.991			10	3	386.8			8	4	413.5
	7.44729	1.08977			1265.84	608.627			12	3	396.7			10	4	406.1
	7.46438	0.96936			1268.34	610.081			14	3	401.2			12	4	403.3
	7.48148	1.0875			1270.85	608.354			16	3	396.7			14	4	407
	7.49857	1.39456			1273.35	609.445			18	3	370.6			16	4	398.8
	7.51567	1.80877			1275.85	608.809			20	3	333.3			18	4	371.7
	7.53276	1.62771			1278.35	608.263			22	3	284.6			20	4	342
	7.54986	1.81056			1280.85	608.809			2	5	357			0	6	332.6
	7.56695	1.93284			1283.35	609.172			4	5	385			2	6	365.5
	7.58404	2.2914			1285.85	608.445			6	5	394.9			4	6	382.4
	7.60114	1.51733			1288.35	609.627			8	5	410.2			6	6	407
	7.61823	1.80041			1290.85	608.536			10	5	421.8			8	6	427.5
	7.63533	1.37989			1293.34	607.809			12	5	423.6			10	6	432.2
	7.65242	1.3791			1295.84	610.627			14	5	417.3			12	6	441.7
	7.66952	0.26306			1298.33	607.718			16	5	402.1			14	6	414.4
	7.68661	0.50135			1300.82	609.354			18	5	388.6			16	6	404.3
	7.7037	0.47988			1303.32	609.354			20	5	366.1			18	6	381.5
	7.7208	1.15014			1305.81	609.263			22	5	310.4			20	6	358.5
	7.73789	1.47806			1308.3	608.445			2	7	366.1			0	8	336
	7.75499	1.71432			1310.79	610.172			4	7	391.3			2	8	359.4
	7.77208	1.56922			1313.28	607.991			6	7	412.8			4	8	393.3
	7.78917	1.48284			1315.76	608.718			8	7	436			6	8	433.2
	7.80627	1.25906			1318.25	609.081			10	7	441.4			8	8	436
	7.82336	1.44284			1320.74	609.263			12	7	440.5			10	8	441.7
	7.84046	0.90705			1323.22	609.9			14	7	424.4			12	8	450.4
	7.85755	1.12542			1325.71	611.991			16	7	407.5			14	8	424.7
	7.87465	1.28214			1328.19	613.354			18	7	394.9			16	8	399.7
	7.89174	0.44789			1330.67	620.445			20	7	367			18	8	389.7
	7.90883	-0.49305			1333.15	638.809			22	7	324.2			20	8	370.8
	7.92593	-1.21935			1335.63	654.263			2	9	337.9			0	10	327.5
	7.94302	-1.79357			1338.11	652.9			4	9	373.3			2	10	355.9
	7.96012	-1.54952			1340.59	649.809			6	9	418.2			4	10	383.3
	7.97721	-0.86417			1343.07	646.445			8	9	444.9			6	10	418.2
	7.99431	-0.26325			1345.54	643.991			8.5	9	450.2			8	10	425.6
	8.0114	-0.08863			1348.02	641.172			9	9	452.9			10	10	439.8
	8.02849	-0.34454			1350.5	637.718			9.5	9	456.4			12	10	449.4
	8.04559	-0.17888			1352.97	635.9			10	9	458.2			14	10	421.9
	8.06268	-0.68619			1355.44	637.9			10.5	9	456.4			16	10	396.9
	8.07978	-0.25618			1357.91	637.354			11	9	454.7			18	10	384.2
	8.09687	0.07165			1360.39	637.081			11.5	9	453.8			20	10	378.9
	8.11397	0.89453			1362.86	635.172			12	9	450.2			0	12	328.4
	8.13106	1.40001			1365.33	632.081			8	9.5	444.9			2	12	346.3
	8.14815	1.66313			1367.79	636.809			8.5	9.5	449.3			4	12	376.2
	8.16525	2.60464			1370.26	632.354			9	9.5	454.7			6	12	404.3
	8.18234	3.21307			1372.73	634.354			9.5	9.5	458.2			8	12	433.2
	8.19944	3.82444			1375.19	632.627			10	9.5	460			10	12	449.4
	8.21653	5.09364			1377.66	633.081			10.5	9.5	456.4			12	12	437.9
	8.23363	6.61659			1380.12	631.081			11	9.5	457.3			14	12	424.7
	8.25072	8.01264			1382.59	630.9			11.5	9.5	455.5			16	12	404.3
	8.26781	9.08762			1385.05	632.9			12	9.5	451.1			18	12	376.2
	8.28491	9.72115			1387.51	632.991			8	10	444			20	12	354.1
	8.302	10.7314			1389.97	632.809			8.5	10	450.2			0	14	325.8
	8.3191	11.7273			1392.43	633.9			9	10	455.5			2	14	344.6
	8.33619	12.9289			1394.89	633.9			9.5	10	460			4	14	364.6
	8.35329	13.8053			1397.35	631.627			10	10	460.8			6	14	384.2
	8.37038	13.6501			1399.8	632.991			10.5	10	461.7			8	14	411.7
	8.38747	13.8197			1402.26	632.809			11	10	456.4			10	14	408
	8.40457	14.8375			1404.71	631.172			11.5	10	452.9			12	14	413.5
	8.42166	16.2185			1407.17	631.9			12	10	453.8			14	14	408.9
	8.43876	18.7198			1409.62	631.627			8	10.5	445.8			16	14	403.3
	8.45585	20.4416			1412.07	632.536			8.5	10.5	452			18	14	362.9
	8.47295	23.6273			1414.53	632.081			9	10.5	455.5			20	14	342.9
	8.49004	26.8057			1416.98	632.445			9.5	10.5	455.5			0	16	310.8
	8.50713	31.8347			1419.43	634.445			10	10.5	457.3			2	16	326.7
	8.52423	38.3021			1421.87	632.536			10.5	10.5	454.7			4	16	340.3
	8.54132	46.1123			1424.32	634.445			11	10.5	452.9			6	16	368.2
	8.55842	55.5782			1426.77	632.263			11.5	10.5	448.5			8	16	390.6
	8.57551	68.661			1429.22	632.627			12	10.5	447.6			10	16	383.3
	8.59261	84.2437			1431.66	634.354			14	9	431.6			12	16	379.8
	8.6097	105.727			1434.11	634.263			16	9	411.9			14	16	373.5
	8.62679	130.527			1436.55	634.9			18	9	394.9			16	16	359.4
	8.64389	160.532			1438.99	634.627			20	9	367.9			18	16	346.3
	8.66098	192.664			1441.43	634.9			22	9	322.3			20	16	327.5
	8.67808	223.518			1443.87	634.263			2	11	343.4			0	18	298.5
	8.69517	248.457			1446.31	635.991			4	11	363.3			2	18	311.6
	8.71226	261.946			1448.75	634.172			6	11	408.4			4	18	322.5
	8.72936	261.45			1451.19	632.991			8	11	437.8			6	18	330.1
	8.74645	247.545			1453.63	636.809			8.5	11	443.1			8	18	352.4
	8.76355	222.601			1456.06	636.627			9	11	447.6			10	18	354.1
	8.78064	189.853			1458.5	634.081			9.5	11	449.3			12	18	348.9
	8.79774	158.372			1460.93	636.627			10	11	447.6			14	18	342.9
	8.81483	129.113			1463.37	637.081			10.5	11	444			16	18	332.6
	8.83192	105.489			1465.8	636.627			11	11	442.2			18	18	327.5
	8.84902	85.3957			1468.23	638.445			11.5	11	441.4			20	18	315.8
	8.86611	68.6967			1470.66	637.263			12	11	440.5			0	20	286.4
	8.88321	55.9705			1473.09	636.809			8	11.5	423.6			2	20	295.2
	8.9003	46.0902			1475.52	637.445			8.5	11.5	430.7			4	20	305.8
	8.9174	38.1108			1477.95	639.172			9	11.5	434.2			6	20	312.5
	8.93449	31.1702			1480.38	640.172			9.5	11.5	435.1			8	20	318.3
	8.95158	25.3701			1482.81	638.9			10	11.5	436			10	20	316.6
	8.96868	20.7496			1485.23	642.354			10.5	11.5	434.2			12	20	315.8
	8.98577	17.0284			1487.66	642.627			11	11.5	433.4			14	20	318.3
	9.00287	13.9068			1490.08	641.354			11.5	11.5	432.5			16	20	311.6
	9.01996	10.8389			1492.5	639.809			12	11.5	432.5			18	20	303.4
	9.03706	8.32818			1494.93	640.445			8	12	409.3			20	20	298.5
	9.05415	6.98396			1497.35	640.354			8.5	12	413.7
	9.07124	6.2295			1499.77	641.991			9	12	418.2			* Data Boundary and Smoothing (total points increase factor - 25; smoothing parameter - 0.001)
	9.08834	5.29294			1502.19	642.081			9.5	12	420.9
	9.10543	3.73034			1504.61	641.263			10	12	422.7
	9.12253	2.58144			1507.02	642.9			10.5	12	423.6
	9.13962	1.94281			1509.44	643.991			11	12	425.3
	9.15672	1.56382			1511.86	644.536			11.5	12	428
	9.17381	0.70388			1514.27	641.445			12	12	428.9
	9.1909	0.34654			1516.69	643.627			8	12.5	403.9
	9.208	0.71599			1519.1	645.172			8.5	12.5	408.4
	9.22509	0.6633			1521.51	642.991			9	12.5	410.2
	9.24219	0.72574			1523.92	642.536			9.5	12.5	411.9
	9.25928	0.04431			1526.33	645.9			10	12.5	414.6
	9.27638	-0.05689			1528.74	645.809			10.5	12.5	417.3
	9.29347	-0.17005			1531.15	646.263			11	12.5	419.1
	9.31056	-0.000275539			1533.56	646.263			11.5	12.5	420.9
	9.32766	-0.00412			1535.97	647.354			12	12.5	423.6
	9.34475	-0.29767			1538.38	645.718			14	11	433.4
	9.36185	0.03576			1540.78	648.263			16	11	420
	9.37894	0.01155			1543.19	647.9			18	11	386.8
	9.39604	0.4123			1545.59	647.809			20	11	347
	9.41313	-0.4056			1547.99	643.263			22	11	326
	9.43022	-0.44458			1550.4	645.9			2	13	339.7
	9.44732	-0.12584			1552.8	646.536			4	13	362.4
	9.46441	0.57289			1555.2	646.536			6	13	376.9
	9.48151	0.52717			1557.6	647.172			8	13	403
	9.4986	1.25301			1560	645.991			8.5	13	405.7
	9.5157	1.76495			1562.39	645.172			9	13	408.4
	9.53279	1.94611			1564.79	647.718			9.5	13	409.3
	9.54988	1.73222			1567.19	644.627			10	13	411
	9.56698	2.0497			1569.58	646.354			10.5	13	414.6
	9.58407	2.49786			1571.98	645.445			11	13	417.3
	9.60117	3.57621			1574.37	645.627			11.5	13	417.3
	9.61826	4.59078			1576.76	645.627			12	13	416.4
	9.63535	5.79189			1579.15	647.536			14	13	417.3
	9.65245	6.59721			1581.54	646.627			16	13	389.5
	9.66954	8.00423			1583.93	647.263			18	13	355.2
	9.68664	8.44342			1586.32	647.354			20	13	337
	9.70373	8.8853			1588.71	644.627			22	13	304.9
	9.72083	9.21027			1591.1	642.809			2	15	322.3
	9.73792	10.3315			1593.49	645.536			4	15	346.1
	9.75501	11.4139			1595.87	646.9			6	15	368.8
	9.77211	13.489			1598.26	643.445			8	15	391.3
	9.7892	15.3925			1600.64	645.445			10	15	394
	9.8063	17.3852			1603.02	644.445			12	15	388.6
	9.82339	19.0083			1605.41	646.172			14	15	370.6
	9.84049	20.5751			1607.79	644.081			16	15	347.9
	9.85758	22.5387			1610.17	645.536			18	15	337
	9.87467	24.5192			1612.55	644.9			20	15	320.5
	9.89177	26.3797			1614.93	644.445			22	15	299.4
	9.90886	27.9272			1617.31	644.445			2	17	315.9
	9.92596	29.2281			1619.68	642.263			4	17	324.2
	9.94305	30.1722			1622.06	642.9			6	17	329.7
	9.96015	31.0701			1624.43	643.809			8	17	343.4
	9.97724	31.5109			1626.81	642.9			10	17	349.7
	9.99433	31.3155			1629.18	644.809			12	17	339.7
	10.0114	31.1835			1631.56	643.9			14	17	333.3
	10.0285	29.9713			1633.93	643.081			16	17	326.9
	10.0456	28.638			1636.3	643.718			18	17	319.6
	10.0627	26.2849			1638.67	643.627			20	17	308.6
	10.0798	24.9277			1641.04	643.536			22	17	292
	10.0969	23.2573			1643.41	642.172			2	19	305.8
	10.114	21.3496			1645.77	641.263			4	19	310.4
	10.1311	18.4894			1648.14	643.536			6	19	306.7
	10.1482	16.2068			1650.51	643.172			8	19	304
	10.1653	14.7605			1652.87	643.627			10	19	300.3
	10.1824	13.4023			1655.24	642.991			12	19	297.5
	10.1995	12.0429			1657.6	641.809			14	19	304
	10.2166	10.9261			1659.96	641.627			16	19	300.3
	10.2337	10.0761			1662.33	640.263			18	19	292
	10.2508	9.3596			1664.69	643.627			20	19	287.3
	10.2678	8.51932			1667.05	641.809			22	19	279
	10.2849	6.91152			1669.41	640.809
	10.302	5.53096			1671.76	639.536			* Data Boundary and Smoothing (total points increase factor - 25; smoothing parameter - 0.001)
	10.3191	4.17151			1674.12	639.718
	10.3362	4.13613			1676.48	641.354
	10.3533	3.34402			1678.84	638.809
	10.3704	2.62203			1681.19	639.536
	10.3875	1.64418			1683.54	637.9
	10.4046	1.38497			1685.9	639.627
	10.4217	1.38792			1688.25	638.991
	10.4388	1.34582			1690.6	637.536
	10.4559	1.58208			1692.95	636.445
	10.473	0.79361			1695.3	637.536
	10.4901	1.10052			1697.65	637.172
	10.5072	0.86801			1700	640.445
	10.5243	1.33994			1702.35	638.172
	10.5413	1.1117			1704.7	636.445
	10.5584	0.81786			1707.04	636.172
	10.5755	1.24919			1709.39	635.9
	10.5926	1.23019			1711.73	635.9
	10.6097	1.85911			1714.07	636.445
	10.6268	2.61237			1716.42	635.172
	10.6439	3.11974			1718.76	632.354
	10.661	3.17514			1721.1	633.354
	10.6781	2.65238			1723.44	634.172
	10.6952	2.32795			1725.78	635.536
	10.7123	2.38118			1728.12	636.172
	10.7294	2.32034			1730.45	634.354
	10.7465	2.43263			1732.79	634.536
	10.7636	1.67043			1735.13	630.9
	10.7807	0.86462			1737.46	630.627
	10.7978	0.57496			1739.8	631.354
	10.8149	0.88003			1742.13	632.172
	10.832	0.75978			1744.46	630.536
	10.8491	0.86134			1746.79	631.263
	10.8661	0.45827			1749.12	629.263
	10.8832	0.5525			1751.45	628.991
	10.9003	0.7018			1753.78	627.536
	10.9174	0.8796			1756.11	627.718
	10.9345	0.41575			1758.44	630.991
	10.9516	0.15998			1760.77	631.809
	10.9687	0.20026			1763.09	631.718
	10.9858	-0.06004			1765.42	629.991
	11.0029	0.51552			1767.74	627.809
	11.02	0.58675			1770.06	627.354
	11.0371	0.43807			1772.39	626.718
	11.0542	-0.01066			1774.71	625.9
	11.0713	-0.14799			1777.03	626.809
	11.0884	0.07143			1779.35	627.536
	11.1055	0.23881			1781.67	625.809
	11.1226	0.65532			1783.99	629.445
	11.1396	1.01471			1786.3	626.809
	11.1567	0.75476			1788.62	626.536
	11.1738	0.74069			1790.94	624.627
	11.1909	0.47706			1793.25	624.627
	11.208	0.61241			1795.57	624.172
	11.2251	0.74315			1797.88	623.263
	11.2422	1.66283			1800.19	624.081
	11.2593	1.35693			1802.5	623.263
	11.2764	1.38454			1804.82	621.9
	11.2935	0.95047			1807.13	624.809
	11.3106	1.47336			1809.44	623.536
	11.3277	1.8751			1811.74	621.081
	11.3448	1.59331			1814.05	623.445
	11.3619	1.44966			1816.36	621.445
	11.379	1.3139			1818.66	621.536
	11.3961	1.44922			1820.97	620.9
	11.4132	1.8044			1823.27	621.627
	11.4302	2.13664			1825.58	620.991
	11.4474	2.49917			1827.88	621.354
	11.4644	2.37301			1830.18	621.809
	11.4815	2.24514			1832.48	620.718
	11.4986	1.95002			1834.78	621.9
	11.5157	1.7655			1837.08	619.627
	11.5328	1.55603			1839.38	619.991
	11.5499	0.99328			1841.68	621.263
	11.567	1.40492			1843.98	620.354
	11.5841	1.22828			1846.27	621.172
	11.6012	1.18979			1848.57	617.445
	11.6183	0.82798			1850.86	620.081
	11.6354	0.69277			1853.16	618.718
	11.6525	1.34749			1855.45	618.991
	11.6696	1.9516			1857.74	618.263
	11.6867	2.68818			1860.04	618.9
	11.7038	2.77419			1862.33	617.718
	11.7209	2.83498			1864.62	618.445
	11.7379	2.75708			1866.9	619.445
	11.755	2.69475			1869.19	618.081
	11.7721	2.71624			1871.48	617.445
	11.7892	2.64613			1873.77	617.718
	11.8063	2.75288			1876.05	618.172
	11.8234	2.54122			1878.34	617.445
	11.8405	2.0934			1880.62	616.991
	11.8576	1.82056			1882.91	616.991
	11.8747	1.36109			1885.19	616.354
	11.8918	1.06473			1887.47	616.718
	11.9089	1.42099			1889.75	616.445
	11.926	1.74448			1892.03	615.718
	11.9431	2.00539			1894.31	615.627
	11.9602	1.88207			1896.59	615.172
	11.9773	1.80198			1898.87	616.172
	11.9944	1.41934			1901.14	614.536
	12.0115	1.03376			1903.42	615.263
	12.0285	0.57059			1905.69	616.263
	12.0457	0.22775			1907.97	616.718
	12.0627	0.42294			1910.24	616.081
	12.0798	0.25874			1912.52	616.536
	12.0969	0.38083			1914.79	615.809
	12.114	0.23028			1917.06	615.536
	12.1311	0.88687			1919.33	616.991
	12.1482	0.79544			1921.6	615.445
	12.1653	0.87763			1923.87	614.081
	12.1824	0.30893			1926.14	614.354
	12.1995	0.35841			1928.4	613.809
	12.2166	0.58424			1930.67	613.627
	12.2337	0.86774			1932.94	613.263
	12.2508	1.28339			1935.2	613.991
	12.2679	1.18			1937.47	612.445
	12.285	1.61352			1939.73	613.445
	12.3021	1.68554			1941.99	614.809
	12.3192	1.86877			1944.25	613.9
	12.3362	1.26037			1946.51	612.991
	12.3533	0.92502			1948.77	613.809
	12.3704	0.59885			1951.03	614.627
	12.3875	0.50595			1953.29	612.991
	12.4046	0.79836			1955.55	615.172
	12.4217	1.2116			1957.81	615.172
	12.4388	1.60673			1960.06	614.536
	12.4559	1.33731			1962.32	613.172
	12.473	1.21347			1964.57	613.627
	12.4901	1.93562			1966.83	612.991
	12.5072	2.4222			1969.08	612.354
	12.5243	3.11455			1971.33	613.172
	12.5414	2.75073			1973.58	613.081
	12.5585	2.61915			1975.84	611.991
	12.5756	2.94526			1978.09	611.445
	12.5927	3.32183			1980.33	611.809
	12.6098	3.69387			1982.58	612.809
	12.6268	3.00886			1984.83	611.718
	12.6439	2.50251			1987.08	611.445
	12.661	2.31035			1989.32	611.718
	12.6781	3.02387			1991.57	611.536
	12.6952	3.48801			1993.81	611.172
	12.7123	4.08775			1996.06	611.809
	12.7294	4.45353			1998.3	611.627
	12.7465	4.56113			2000.54	609.991
	12.7636	4.22754			2002.78	611.354
	12.7807	4.18055			2005.02	612.354
	12.7978	4.15757			2007.26	610.809
	12.8149	4.15165			2009.5	611.809
	12.832	4.23458			2011.74	612.445
	12.8491	4.21718			2013.98	612.263
	12.8662	4.48938			2016.21	611.081
	12.8833	4.86812			2018.45	611.536
	12.9004	4.85109			2020.68	609.354
	12.9175	4.99595			2022.92	609.536
	12.9345	4.85291			2025.15	609.536
	12.9516	5.70684			2027.38	609.081
	12.9687	5.8146			2029.62	608.627
	12.9858	5.72011			2031.85	609.445
	13.0029	5.03854			2034.08	609.718
	13.02	4.32333			2036.31	608.9
	13.0371	3.80626			2038.54	609.991
	13.0542	3.4219			2040.76	609.536
	13.0713	3.18446			2042.99	609.809
	13.0884	3.3735			2045.22	609.172
	13.1055	3.86315			2047.44	608.081
	13.1226	4.49633			2049.67	608.627
	13.1397	4.12737			2051.89	608.627
	13.1568	3.93324			2054.12	609.809
	13.1739	3.7079			2056.34	608.991
	13.191	3.90503			2058.56	609.081
	13.2081	3.62111			2060.78	608.9
	13.2251	3.91194			2063	609.718
	13.2422	3.67616			2065.22	608.718
	13.2593	3.11913			2067.44	609.809
	13.2764	2.63241			2069.66	609.991
	13.2935	1.83263			2071.87	609.536
	13.3106	1.75872			2074.09	608.627
	13.3277	1.35797			2076.31	608.9
	13.3448	1.68911			2078.52	607.9
	13.3619	2.0415			2080.73	609.445
	13.379	1.77419			2082.95	609.354
	13.3961	1.13731			2085.16	609.718
	13.4132	1.30537			2087.37	608.263
	13.4303	1.56717			2089.58	608.9
	13.4474	1.81299			2091.79	609.445
	13.4645	0.86788			2094	609.9
	13.4816	0.38629			2096.21	609.263
	13.4987	-0.11956			2098.42	611.263
	13.5158	0.03609			2100.63	608.718
	13.5328	-0.11003			2102.83	610.263
	13.5499	-0.20568			2105.04	608.991
	13.567	-0.60236			2107.24	608.991
	13.5841	-0.14057			2109.45	609.445
	13.6012	0.24875			2111.65	609.081
	13.6183	0.53458			2113.85	609.536
	13.6354	0.88086			2116.06	607.627
	13.6525	1.12597			2118.26	608.627
	13.6696	1.47945			2120.46	609.536
	13.6867	0.91471			2122.66	607.991
	13.7038	0.71588			2124.85	608.809
	13.7209	0.38248			2127.05	609.354
	13.738	0.67578			2129.25	608.536
	13.7551	1.32517			2131.45	608.627
	13.7722	1.32296			2133.64	608.263
	13.7893	1.19488			2135.84	609.263
	13.8064	1.07576			2138.03	608.445
	13.8234	1.56397			2140.22	610.263
	13.8405	2.20744			2142.42	609.354
	13.8576	2.79265			2144.61	610.081
	13.8747	2.90753			2146.8	608.9
	13.8918	2.68381			2148.99	609.081
	13.9089	3.30047			2151.18	609.536
	13.926	4.24987			2153.37	609.9
	13.9431	5.73098			2155.56	608.172
	13.9602	6.8875			2157.74	608.354
	13.9773	7.17012			2159.93	608.536
	13.9944	7.3563			2162.12	608.809
	14.0115	8.09541			2164.3	609.627
	14.0286	9.44087			2166.49	608.627
	14.0457	10.9313			2168.67	609.081
	14.0628	12.7754			2170.85	609.354
	14.0799	14.3101			2173.03	608.354
	14.097	16.6748			2175.22	609.172
	14.1141	18.1973			2177.4	609.627
	14.1311	20.5265			2179.58	609.627
	14.1482	22.517			2181.75	608.172
	14.1653	24.9338			2183.93	608.809
	14.1824	27.5624			2186.11	609.081
	14.1995	29.6343			2188.29	609.172
	14.2166	31.9195			2190.46	608.809
	14.2337	33.2999			2192.64	608.263
	14.2508	34.3501			2194.81	609.081
	14.2679	35.0352			2196.99	608.627
	14.285	35.2843			2199.16	608.627
	14.3021	34.4267			2201.33	608.536
	14.3192	33.3452
	14.3363	31.9086
	14.3534	29.9254
	14.3705	27.8479
	14.3876	25.3612
	14.4047	23.1844
	14.4217	20.5713
	14.4388	17.7806
	14.4559	14.905
	14.473	12.8629
	14.4901	10.8947
	14.5072	9.31853
	14.5243	7.31453
	14.5414	5.97199
	14.5585	4.82284
	14.5756	4.15603
	14.5927	3.04588
	14.6098	2.23499
	14.6269	1.38329
	14.644	1.30509
	14.6611	1.09914
	14.6782	1.18654
	14.6953	0.97351
	14.7124	0.97783
	14.7294	0.61656
	14.7465	0.59787
	14.7636	0.74437
	14.7807	0.9539
	14.7978	1.09727
	14.8149	1.09551
	14.832	0.76691
	14.8491	0.14347
	14.8662	-0.11403
	14.8833	0.24895
	14.9004	0.23524
	14.9175	0.06772
	14.9346	-0.22115
	14.9517	0.23609
	14.9688	0.65395
	14.9859	0.99557
	15.003	0.71642
	15.02	0.44314
	15.0371	-0.13312
	15.0542	-0.46564
	15.0713	-0.52211
	15.0884	-0.16797
	15.1055	0.02896
	15.1226	0.47806
	15.1397	0.41999
	15.1568	0.69517
	15.1739	0.81034
	15.191	0.8249
	15.2081	0.48621
	15.2252	0.31429
	15.2423	0.03182
	15.2594	-0.12698
	15.2765	0.25264
	15.2935	0.45082
	15.3107	0.52713
	15.3277	0.44935
	15.3448	0.57361
	15.3619	0.65836
	15.379	0.38783
	15.3961	0.57352
	15.4132	0.59445
	15.4303	0.78407
	15.4474	0.51438
	15.4645	0.44335
	15.4816	0.2255
	15.4987	0.08344
	15.5158	0.29563
	15.5329	0.38301
	15.55	0.71086
	15.5671	0.45858
	15.5842	0.61893
	15.6013	0.0845
	15.6183	-0.06207
	15.6354	-0.11925
	15.6525	0.18
	15.6696	0.2418
	15.6867	0.24127
	15.7038	0.30575
	15.7209	0.79091
	15.738	0.84219
	15.7551	0.89946
	15.7722	0.5534
	15.7893	0.37634
	15.8064	0.04805
	15.8235	-0.12858
	15.8406	0.09726
	15.8577	0.57537
	15.8748	0.54282
	15.8918	0.31418
	15.909	0.14205
	15.926	0.01834
	15.9431	-0.05755
	15.9602	-0.1138
	15.9773	0.12801
	15.9944	0.07484
	16.0115	0.13566
	16.0286	-0.00336
	16.0457	-0.07855
	16.0628	-0.19491
	16.0799	0.45324
	16.097	0.86176
	16.1141	0.62682
	16.1312	0.04947
	16.1483	0.29854
	16.1654	0.82899
	16.1825	1.04623
	16.1995	1.21137
	16.2166	1.52475
	16.2337	1.89956
	16.2508	1.75879
	16.2679	1.36319
	16.285	1.72942
	16.3021	2.24218
	16.3192	2.57176
	16.3363	2.51447
	16.3534	2.85426
	16.3705	3.26139
	16.3876	3.8982
	16.4047	4.40769
	16.4218	4.81634
	16.4389	5.41116
	16.456	5.8467
	16.4731	6.63531
	16.4901	6.7604
	16.5072	7.02772
	16.5243	7.65332
	16.5414	8.38148
	16.5585	8.82753
	16.5756	8.95886
	16.5927	9.45283
	16.6098	9.99009
	16.6269	10.3701
	16.644	10.634
	16.6611	10.8745
	16.6782	10.8853
	16.6953	10.4418
	16.7124	10.4617
	16.7295	9.92083
	16.7466	9.42675
	16.7637	8.82697
	16.7808	8.4305
	16.7979	7.73534
	16.8149	7.18665
	16.832	6.80013
	16.8491	6.27202
	16.8662	5.40217
	16.8833	4.59497
	16.9004	3.92691
	16.9175	3.41752
	16.9346	2.99758
	16.9517	2.15188
	16.9688	1.34595
	16.9859	1.09647
	17.003	1.54283
	17.0201	1.5287
	17.0372	1.04731
	17.0543	0.4216
	17.0714	0.25824
	17.0885	0.32555
	17.1056	0.47872
	17.1226	0.474
	17.1397	0.12052
	17.1568	0.57491
	17.1739	0.47135
	17.191	0.84949
	17.2081	1.07379
	17.2252	1.25193
	17.2423	1.4919
	17.2594	1.86806
	17.2765	1.916
	17.2936	1.52854
	17.3107	1.18034
	17.3278	1.25951
	17.3449	1.48997
	17.362	1.71391
	17.379	2.45741
	17.3961	2.87644
	17.4132	2.98912
	17.4303	2.93754
	17.4474	3.62914
	17.4645	4.07985
	17.4816	4.34758
	17.4987	3.78027
	17.5158	3.43528
	17.5329	3.10481
	17.55	2.93758
	17.5671	2.49701
	17.5842	2.12967
	17.6013	2.02661
	17.6184	1.92829
	17.6355	1.74162
	17.6526	1.31487
	17.6697	1.01335
	17.6867	0.7125
	17.7038	0.49921
	17.7209	0.49288
	17.738	0.36981
	17.7551	-0.08061
	17.7722	-0.16567
	17.7893	-0.12751
	17.8064	0.05221
	17.8235	0.09026
	17.8406	0.22143
	17.8577	0.21843
	17.8748	0.34958
	17.8919	0.78624
	17.909	0.83259
	17.9261	0.72569
	17.9432	0.14109
	17.9603	0.40367
	17.9774	0.84588
	17.9945	0.88195
	18.0115	0.45826
	18.0286	0.02195
	18.0457	-0.23621
	18.0628	-0.15478
	18.0799	0.43567
	18.097	1.02678
	18.1141	1.01534
	18.1312	0.65219
	18.1483	0.9718
	18.1654	0.88816
	18.1825	0.51237
	18.1996	0.39107
	18.2167	0.65036
	18.2338	0.65492
	18.2509	0.89071
	18.268	0.6292
	18.285	0.32419
	18.3021	-0.03547
	18.3192	0.13561
	18.3363	0.15304
	18.3534	0.02
	18.3705	0.10827
	18.3876	0.48948
	18.4047	0.93196
	18.4218	1.2198
	18.4389	0.95393
	18.456	0.97215
	18.4731	0.8797
	18.4902	0.60543
	18.5073	0.4672
	18.5244	0.38913
	18.5415	0.09562
	18.5586	0.0766
	18.5756	0.07452
	18.5927	-0.06025
	18.6098	-0.0688
	18.6269	0.03777
	18.644	0.47915
	18.6611	0.92533
	18.6782	1.22198
	18.6953	0.88852
	18.7124	0.6605
	18.7295	0.50368
	18.7466	0.27615
	18.7637	0.19291
	18.7808	-0.03583
	18.7979	0.02635
	18.815	0.27055
	18.8321	0.62926
	18.8492	0.56118
	18.8663	0.3372
	18.8834	-0.07537
	18.9004	0.04269
	18.9175	0.34055
	18.9346	0.47892
	18.9517	0.69531
	18.9688	0.96149
	18.9859	1.05626
	19.003	0.59903

## Sheet: Figure 2
Figure 2
	run 1					run 2					run 3					run 4					run 5					run 6					run 7					run 8					Eremets (9, 25)			Akahama (30)			Akahama (31)
	Pressure (GPa)	±DP (GPa)	Raman shift (cm^-1)	±w (cm^-1)		Pressure (GPa)	±DP (GPa)	Raman shift (cm^-1)	±w (cm^-1)		Pressure (GPa)	±DP (GPa)	Raman shift (cm^-1)	±w (cm^-1)		Pressure (GPa)	±DP (GPa)	Raman shift (cm^-1)	±w (cm^-1)		Pressure (GPa)	±DP (GPa)	Raman shift (cm^-1)	±w (cm^-1)		Pressure (GPa)	±DP (GPa)	Raman shift (cm^-1)	±w (cm^-1)		Pressure (GPa)	±DP (GPa)	Raman shift (cm^-1)	±w (cm^-1)		Pressure (GPa)	±DP (GPa)	Raman shift (cm^-1)	±w (cm^-1)		Pressure (GPa)	Raman shift (cm^-1)		Pressure (GPa)	Raman shift (cm^-1)		Pressure (GPa)	Raman shift (cm^-1)
	343.4	11.5	1900	6		418.2	16.7	1965	6		412.8	16.5	1945	8		315	10.6	1840	6		262.2	8.4	1792	6		284.6	9.1	1810	6		283	9.1	1806	6		188.6	4.9	1694	4		1.5	1340		-1.4	1334		260	1768
	404.8	16.2	1945	5		425.3	17	1981	12		434.2	17.4	1985	8		357	12.9	1915	6		344.3	11.5	1895	6		323.3	10.8	1859	6							238.8	6.7	1756	12		8.4	1354		12.6	1369.5		299.6	1830
	419.1	16.8	1978	6		461.7	20.8	2000	6		427.1	17.1	1973	8																						259.4	8.3	1793	4		9.2	1359		17.8	1375		365.5	1872
	445.8	17.8	2003	8		473.2	21.3	2015	10		445.8	17.8	1996	8																						312.3	10.5	1835	10		13	1366		22	1385.8		368.4	1877
	459.1	20.7	2005	8		472.3	21.3	2011	10																											357	12.9	1890	10		13.7	1378		24.6	1391		401	1907
	476.7	21.5	2026	8																																					20	1388		27.1	1400.1		332.9	1846
																																									26	1401		29.7	1400		360.5	1867
																																									29.8	1411		31.8	1408.5
																																									36.7	1426		34.8	1414
																																									39.7	1432		39.4	1422.8
																																									40.5	1438		48	1441
																																									41	1433		58.6	1468.6
																																									45.8	1443		65.4	1476
																																									48.1	1446		79.8	1506.9
																																									54.2	1460		88.8	1511
																																									61.9	1471		106.6	1546.6
																																									64.9	1468		111.8	1560
																																									70	1487		116.8	1556.6
																																									71.8	1483		131.3	1581
																																									74.8	1493		168.3	1651
																																									76.4	1502		188.7	1673
																																									92.4	1523		44.7	1436
																																									92.4	1529		141.6	1604
																																									97.7	1527		174	1646
																																									100	1540		157.9	1625
																																									108.4	1559		160.5	1638
																																									114	1563		174.6	1653
																																									119.1	1563		187.6	1668
																																									120.7	1568		141.6	1615
																																									120.7	1574		188.8	1686
																																									123.7	1584		203.7	1708
																																									134.4	1609		214.6	1728
																																									135	1597		224.5	1737
																																									139.8	1606		230.4	1747
																																									155	1628		243.3	1760
																																									155	1633		218.6	1724
																																									158	1634		238.3	1756
																																									167	1667		265	1781
																																									167.2	1667		269.9	1791
																																									171.1	1654		280.8	1801
																																									176.4	1671		280.8	1803
																																									177.9	1678		284.8	1807
																																									187.1	1681		291.7	1811
																																									191.7	1694		286.8	1802
																																									200	1702		304.5	1824
																																									200.8	1702		188.8	1686
																																									203.1	1702		203.7	1708
																																									216.9	1724		214.6	1728
																																									219.9	1723		224.5	1737
																																									220	1724		230.4	1747
																																									220.7	1713		243.3	1760
																																									226	1714		238.3	1756
																																									226.8	1717		265	1781
																																									226.8	1742		269.9	1791
																																									234.4	1746		280.8	1801
																																									249	1767		280.8	1803
																																									249.7	1767		284.8	1807
																																									255.1	1776		291.7	1811
																																									264.2	1787		286.8	1802
																																									266.5	1795		304.5	1824
																																									268	1794		206.7	1705
																																									280	1777
																																									280	1792
																																									281	1810
																																									284	1795
																																									322.3	1840
[truncated: 7 more columns]

## Sheet: Figure 3
Figure 3a																																			Figure 3b
	run 1			run 2			run 3			run 4			run 5			run 6			run 7			run 8			Dewaele (2)			EoS of Au (23)			1s standard deviation					run 1				run 2				run 2, bevel				run 3
	Pressure (GPa)	Au volume (Å^3/atom)		Pressure (GPa)	Au volume (Å^3/atom)		Pressure (GPa)	Au volume (Å^3/atom)		Pressure (GPa)	Au volume (Å^3/atom)		Pressure (GPa)	Au volume (Å^3/atom)		Pressure (GPa)	Au volume (Å^3/atom)		Pressure (GPa)	Au volume (Å^3/atom)		Pressure (GPa)	Au volume (Å^3/atom)		Pressure (GPa)	Au volume (Å^3/atom)		Pressure (GPa)	Au volume (Å^3/atom)		Pressure min (GPa)	Pressure max (GPa)	Au volume (Å^3/atom)			Pressure (GPa)	±DP (GPa)	t (GPa)		Pressure (GPa)	±DP (GPa)	t (GPa)		Pressure (GPa)	±DP (GPa)	t (GPa)		Pressure (GPa)	±DP (GPa)
	35.2	14.74		201	11.43		412.8	9.82		315	10.43		13.4	15.87		284.6	10.65		283	10.66		11.2	16.01		231.1	10.99		0	16.93		0.4	0.4	16.89			343.4	11.9	7.35		418.2	16.4	11.87		202.9	5.6	2.17		412.8	16
	35.2	14.74		202.9	11.41		427.1	9.74		357	10.14		14.4	15.8		323.3	10.37					188.6	11.57		244.3	10.94		0.1	16.92		1.7	1.9	16.76			404.8	15	9.7		425.3	17	12.91		205.7	5.6	2.33		427.1	17
	35.2	14.74		202.9	11.41		434.2	9.7					14.9	15.77								238.8	11.05		271.6	10.72		0.2	16.91		3.2	3.6	16.61			419.1	16.5	6.29		461.7	20.2	12.88		211.4	5.9	2.8		434.2	18
	35.2	14.74		203.8	11.4		445.8	9.65					15.4	15.74								259.4	10.86		280	10.64		0.2	16.91		7	7.6	16.29			428	17	9.05		472.3	21	12.78		217.1	6.2	2.89		445.8	19
	35.7	14.72		204.8	11.39								15.9	15.71								312.3	10.45		286.2	10.6		0.2	16.9		9	9.6	16.15			445.8	19	7.35		473.2	21	14.25		226.6	6.5	3.56
	35.7	14.72		205.7	11.38								16.5	15.67								357	10.14		314.2	10.4		0.3	16.9		11.1	11.9	15.99			459.1	20.2	9.11						240.7	7	3.81
	35.7	14.72		205.7	11.38								17	15.64											336.5	10.24		0.4	16.89		13.4	14.2	15.84			476.7	21	11.51						261.3	8	4.72
	36.2	14.7		206.7	11.37								17	15.64											358.2	10.1		0.4	16.89		16.1	16.9	15.67											280.9	9	6.2
	36.2	14.7		207.6	11.36								17.5	15.61											375.7	10		0.5	16.88		18.3	19.3	15.54											307.7	10	7.1
	36.8	14.68		207.6	11.36								17.5	15.61											392.4	9.92		0.6	16.87		21	22	15.39											336.1	11.4	8.09
	37.3	14.66		209.5	11.34								18	15.58											407.1	9.84		0.6	16.87		23.7	24.7	15.25											380.5	14.2	11.5
	37.8	14.64		210.5	11.33								18	15.58											428	9.73		0.7	16.86		26.4	27.6	15.11											418.2	16.4	12.74
	39.3	14.58		210.5	11.33								18	15.58											440.6	9.68		0.8	16.86		29.2	30.4	14.98											464.4	21	12.37
	39.8	14.56		210.5	11.33								19	15.53											453.2	9.63		0.8	16.85		32.4	33.8	14.83											467.9	21	12.89
	40.8	14.52		211.4	11.32								19	15.53											459.4	9.55		0.8	16.85		35.4	36.8	14.71											469.7	21	13.45
	41.3	14.5		211.4	11.32								19	15.53											475.6	9.5		0.9	16.84		38.8	40.4	14.57											470.6	21	15.57
	42.3	14.46		213.3	11.3								19	15.53											485.4	9.45		1	16.83		42.1	43.7	14.44											470.6	21	14
	42.8	14.45		213.3	11.3								19	15.53											492.4	9.42		1	16.83		45.6	47.4	14.31
	43.3	14.43		214.3	11.29								19.5	15.5											500.7	9.37		1.1	16.82		49.2	51.2	14.19
	45.8	14.34		215.2	11.28								19.5	15.5											509.8	9.33		1.2	16.81		52.8	55	14.06
	45.8	14.34		215.2	11.28								20	15.47											516.8	9.3		1.2	16.81		56.8	59.2	13.94
	46.3	14.32		215.2	11.28								20	15.47											528	9.26		1.3	16.81		60.6	63.2	13.82
	48.3	14.25		216.2	11.27								20	15.47											541.2	9.23		1.4	16.8		64.7	67.5	13.7
	49.4	14.21		217.1	11.26								20.5	15.44											545.3	9.2		1.4	16.79		68.8	72	13.59
	50.4	14.18		217.1	11.26								20.5	15.44											554.5	9.16		1.5	16.79		73.1	76.5	13.47
	50.4	14.18		217.1	11.26								21	15.41											562.8	9.14		1.5	16.78		77.3	81.1	13.36
	51.4	14.15		218.1	11.25								21.5	15.39											573.3	9.1		1.6	16.77		82.1	86.1	13.25
	52.4	14.11		218.1	11.25								21.5	15.39											582.4	9.07		1.7	16.77		86.9	91.1	13.14
	54.4	14.05		218.1	11.25								21.5	15.39											592.2	9.04		1.7	16.77		91.7	96.3	13.03
	54.4	14.05		219	11.24								22.1	15.36											603.4	9.01		1.8	16.76		96.7	101.5	12.93
	54.4	14.05		219	11.24								22.6	15.33														1.9	16.75		101.7	106.7	12.82
	57.4	13.96		219	11.24								23.1	15.31														1.9	16.75		106.7	112.1	12.72
	58.4	13.93		219	11.24								23.1	15.31														2	16.74		111.8	117.6	12.63
	61.4	13.84		220	11.23								23.6	15.28														2.1	16.73		117.3	123.5	12.53
	61.9	13.82		220	11.23								24.1	15.25														2.1	16.73		123.1	129.5	12.43
	63.4	13.78		220	11.23								24.1	15.25														2.1	16.73		128.9	135.5	12.33
	63.4	13.78		220	11.23								24.1	15.25														2.2	16.72		134.7	141.7	12.24
	64.4	13.75		220.9	11.22								24.6	15.23														2.3	16.71		140.7	147.9	12.15
	65.4	13.72		220.9	11.22								24.6	15.23														2.4	16.7		146.6	154.2	12.06
	68.4	13.64		220.9	11.22								25.1	15.2														2.5	16.69		152.7	160.7	11.97
	68.9	13.63		221.8	11.21								25.1	15.2														2.5	16.69		159.4	167.6	11.87
	69.4	13.61		221.8	11.21								25.6	15.18														2.6	16.68		165.6	174.2	11.79
	70.4	13.59		221.8	11.21								25.6	15.18														2.7	16.68		172.4	181.4	11.71
	72.4	13.53		221.8	11.21								26.1	15.15														2.8	16.67		178.6	188.2	11.63
	74.4	13.48		221.8	11.21								26.1	15.15														2.8	16.67		185.8	195.8	11.55
	75.4	13.46		221.8	11.21								26.1	15.15														2.9	16.66		192.5	203.1	11.47
	75.4	13.46		222.8	11.2								26.1	15.15														3	16.65		199.5	210.7	11.39
	76.4	13.43		222.8	11.2								26.1	15.15														3	16.65		206.7	218.5	11.31
	78.4	13.39		223.7	11.19								26.6	15.13														3.1	16.64		214.4	226.8	11.23
	78.4	13.39		224.7	11.18								27.1	15.1														3.1	16.64		229.5	243.3	11.07
	79.4	13.36		224.7	11.18								27.1	15.1														3.2	16.63		237.1	251.5	10.99
	80.4	13.34		224.7	11.18								27.6	15.08														3.2	16.63		245	260.2	10.93
	81.4	13.31		225.6	11.17								27.6	15.08														3.3	16.62		253.2	269.2	10.85
	83.3	13.27		225.6	11.17								28.1	15.06														3.4	16.61		261.4	278.2	10.77
	83.3	13.27		225.6	11.17								28.1	15.06														3.4	16.61		269.8	287.4	10.71
	83.3	13.27		225.6	11.17								28.7	15.03														3.5	16.6		278.2	296.6	10.63
	84.3	13.24		225.6	11.17								29.2	15.01														3.6	16.59		286.8	306	10.57
	86.3	13.2		226.6	11.16								29.2	15.01														3.7	16.59		295.4	315.4	10.49
	86.3	13.2		226.6	11.16								30.2	14.96														3.7	16.59		304.1	325.1	10.43
	86.8	13.19		226.6	11.16								30.2	14.96														3.8	16.58		313.6	335.4	10.37
	87.3	13.18		226.6	11.16								30.2	14.96														3.9	16.57		322.4	345.2	10.29
	88.3	13.15		226.6	11.16								30.2	14.96														3.9	16.57		331.4	355.2	10.23
	88.3	13.15		226.6	11.16								30.7	14.94														4	16.56		341.1	365.9	10.17
	90.3	13.11		226.6	11.16								31.2	14.92														4.1	16.55		350.3	376.1	10.11
	90.3	13.11		226.6	11.16								31.2	14.92														4.1	16.55		359.6	386.6	10.05
	92.3	13.07		227.5	11.15								33.7	14.81														4.2	16.55		369.4	397.8	9.99
	92.3	13.07		227.5	11.15								33.7	14.81														4.3	16.54		378.8	408.4	9.93
	93.3	13.05		227.5	11.15								34.7	14.76														4.4	16.53		400.8	433.6	9.79
	93.3	13.05		227.5	11.15								36.2	14.7														4.4	16.53		407.7	441.7	9.75
	94.2	13.03		228.5	11.14								37.3	14.66														4.5	16.52		418	454	9.69
	94.2	13.03		228.5	11.14								38.3	14.62														4.6	16.51		427.5	465.5	9.65
	94.2	13.03		228.5	11.14								39.3	14.58														4.6	16.51		440.8	481.2	9.57
	96.2	12.98		228.5	11.14								39.3	14.58														4.7	16.51		463	506	9.47
	96.2	12.98		228.5	11.14								39.8	14.56														4.8	16.5		472.4	516.6	9.41
	98.2	12.94		228.5	11.14								39.8	14.56														4.9	16.49		482	527.2	9.37
	99.2	12.92		228.5	11.14								40.8	14.52														5	16.48		496.6	543	9.31
	100.2	12.9		228.5	11.14								41.3	14.5														5.1	16.47		506.2	553.8	9.25
	100.2	12.9		229.4	11.13								42.3	14.46														5.1	16.47		521	570.2	9.19
	100.2	12.9		229.4	11.13								42.3	14.46														5.2	16.46		530.9	581.3	9.15
	101.2	12.88		229.4	11.13								43.3	14.43														5.3	16.46		540.7	592.5	9.11
	102.1	12.86		229.4	11.13								43.3	14.43														5.3	16.45		550.5	604.1	9.07
	102.1	12.86		229.4	11.13								43.8	14.41														5.4	16.45		565.9	620.9	9.01
	104.1	12.83		230.3	11.13								44.3	14.39														5.5	16.44		576.2	632.4	8.97
	105.1	12.81		230.3	11.13								45.3	14.35														5.6	16.43		592.1	649.3	8.91
	106.1	12.79		230.3	11.13								46.3	14.32														5.6	16.43		602.4	661.2	8.87
	107.1	12.77		230.3	11.13								46.3	14.32														5.7	16.42		618.6	678.6	8.81
	108.1	12.75		231.3	11.12								47.3	14.28														5.8	16.42		629.2	690.6	8.79
	108.1	12.75		231.3	11.12								48.3	14.25														5.8	16.41
	109	12.73		231.3	11.12								49.4	14.21														5.9	16.41
	110	12.71		231.3	11.12								49.4	14.21														6	16.4
	111	12.7		231.3	11.12								52.4	14.11														6.1	16.39
	112	12.68		232.2	11.11								54.4	14.05														6.1	16.39
	114	12.64		232.2	11.11								55.4	14.02														6.2	16.38
	114.9	12.62		232.2	11.11								58.4	13.93														6.3	16.37
	115.9	12.61		232.2	11.11								58.4	13.93														6.3	16.37
	115.9	12.61		232.2	11.11								73.4	13.51														6.4	16.37
	116.9	12.59		232.2	11.11								85.3	13.22														6.5	16.36
	117.9	12.57		232.2	11.11								105.1	12.81														6.6	16.35
	118.9	12.55		232.2	11.11								107.1	12.77														6.6	16.35
	120.8	12.52		232.2	11.11								108.1	12.75														6.7	16.34
	122.8	12.49		233.2	11.1								135.5	12.28														6.8	16.33
	123.8	12.47		233.2	11.1								150.1	12.06														6.9	16.33
	124.7	12.45		233.2	11.1								158.8	11.94														6.9	16.33
	124.7	12.45		233.2	11.1								183.8	11.62														7	16.32
	125.7	12.44		233.2	11.1								194.3	11.5														7.1	16.31
	126.7	12.42		233.2	11.1								214.3	11.29														7.1	16.31
	128.6	12.39		233.2	11.1								216.2	11.27														7.2	16.3
	128.6	12.39		233.2	11.1								233.2	11.1														7.3	16.29
	129.6	12.37		234.1	11.09								247.3	10.97														7.4	16.29
	130.6	12.36		234.1	11.09								257.6	10.88														7.4	16.29
	132.5	12.33		234.1	11.09								258.5	10.87														7.5	16.28
	134.5	12.3		234.1	11.09								259.4	10.86														7.6	16.27
	134.5	12.3		234.1	11.09								259.4	10.86														7.7	16.26
	135.5	12.28		234.1	11.09								260.4	10.85														7.8	16.25
	137.4	12.25		234.1	11.09								262.2	10.84														7.9	16.25
	139.4	12.22		234.1	11.09								262.2	10.84														8	16.24
	140.3	12.21		235.1	11.08								263.2	10.83														8.1	16.24
	142.3	12.18		235.1	11.08								344.3	10.23														8.2	16.23
	143.3	12.16		235.1	11.08																							8.2	16.23
	143.3	12.16		235.1	11.08																							8.3	16.22
	145.2	12.13		235.1	11.08																							8.4	16.21
	145.2	12.13		235.1	11.08																							8.4	16.21
	146.2	12.12		235.1	11.08																							8.5	16.2
	150.1	12.06		236	11.07																							8.6	16.2
	151	12.05		236	11.07																							8.7	16.19
	153	12.02		236	11.07																							8.7	16.19
	153.9	12.01		236	11.07																							8.8	16.18
	154.9	11.99		236	11.07																							8.9	16.17
	155.9	11.98		236	11.07																							9	16.17
	155.9	11.98		236.9	11.06																							9.1	16.16
	156.8	11.97		236.9	11.06																							9.2	16.15
	156.8	11.97		236.9	11.06																							9.3	16.15
	157.8	11.95		236.9	11.06																							9.3	16.15
	157.8	11.95		236.9	11.06																							9.4	16.14
	157.8	11.95		236.9	11.06																							9.5	16.13
	158.8	11.94		236.9	11.06																							9.5	16.13
	160.7	11.92		237.9	11.05																							9.6	16.12
	160.7	11.92		237.9	11.05																							9.7	16.11
	161.7	11.9		237.9	11.05																							9.8	16.11
	161.7	11.9		237.9	11.05																							9.9	16.11
	163.6	11.88		237.9	11.05																							10	16.1
	163.6	11.88		237.9	11.05																							10.1	16.09
	164.6	11.86		237.9	11.05																							10.1	16.09
	165.5	11.85		237.9	11.05																							10.2	16.08
	165.5	11.85		237.9	11.05																							10.3	16.07
	166.5	11.84		238.8	11.05																							10.4	16.07
	166.5	11.84		238.8	11.05																							10.4	16.07
	167.4	11.83		238.8	11.05																							10.5	16.06
	167.4	11.83		238.8	11.05																							10.7	16.05
	168.4	11.81		238.8	11.05																							10.8	16.04
	168.4	11.81		238.8	11.05																							10.9	16.03
	169.4	11.8		238.8	11.05																							10.9	16.03
	172.3	11.76		238.8	11.05																							11	16.02
	174.2	11.74		238.8	11.05																							11.1	16.02
	174.2	11.74		238.8	11.05																							11.2	16.01
	176.1	11.72		238.8	11.05																							11.3	16.01
	178	11.69		239.8	11.04																							11.4	16
	178	11.69		239.8	11.04																							11.5	15.99
	178	11.69		239.8	11.04																							11.5	15.99
	178	11.69		239.8	11.04																							11.6	15.98
	179	11.68		239.8	11.04																							11.7	15.98
	179.9	11.67		239.8	11.04																							11.8	15.97
	183.8	11.62		240.7	11.03																							11.9	15.97
	184.7	11.61		240.7	11.03																							12	15.96
	185.7	11.6		240.7	11.03																							12.1	15.95
	185.7	11.6		240.7	11.03																							12.1	15.95
	186.6	11.59		240.7	11.03																							12.2	15.94
	188.6	11.57		240.7	11.03																							12.3	15.93
	188.6	11.57		240.7	11.03																							12.4	15.93
	189.5	11.56		240.7	11.03																							12.5	15.93
	194.3	11.5		240.7	11.03																							12.6	15.92
	195.2	11.49		240.7	11.03																							12.7	15.91
	195.2	11.49		241.6	11.02																							12.7	15.91
	195.2	11.49		241.6	11.02																							12.8	15.9
	197.2	11.47		241.6	11.02																							13	15.89
	197.2	11.47		241.6	11.02																							13	15.89
	198.1	11.46		241.6	11.02																							13.1	15.89
	201	11.43		241.6	11.02																							13.2	15.88
	202.9	11.41		241.6	11.02																							13.3	15.87
	204.8	11.39		242.6	11.01																							13.3	15.87
	207.6	11.36		242.6	11.01																							13.5	15.86
	207.6	11.36		242.6	11.01																							13.6	15.85
	208.6	11.35		242.6	11.01																							13.7	15.85
	212.4	11.31		242.6	11.01																							13.7	15.85
	212.4	11.31		242.6	11.01																							13.8	15.84
	212.4	11.31		243.5	11																							14	15.83
	216.2	11.27		243.5	11																							14.1	15.82
	218.1	11.25		243.5	11																							14.2	15.81
	218.1	11.25		243.5	11																							14.3	15.81
	219	11.24		243.5	11																							14.3	15.8
	220	11.23		243.5	11																							14.5	15.8
	221.8	11.21		243.5	11																							14.6	15.79
	221.8	11.21		244.5	10.99																							14.6	15.79
	223.7	11.19		244.5	10.99																							14.7	15.78
	225.6	11.17		244.5	10.99																							14.9	15.77
	227.5	11.15		244.5	10.99																							14.9	15.77
	228.5	11.14		244.5	10.99																							15	15.76
	233.2	11.1		245.4	10.98																							15.1	15.76
	233.2	11.1		245.4	10.98																							15.2	15.75
	234.1	11.09		245.4	10.98																							15.3	15.75
	234.1	11.09		245.4	10.98																							15.4	15.74
	238.8	11.05		245.4	10.98																							15.5	15.73
	238.8	11.05		246.3	10.98																							15.6	15.73
	243.5	11		246.3	10.98																							15.7	15.72
	243.5	11		246.3	10.98																							15.8	15.71
	243.5	11		246.3	10.98																							15.9	15.71
	247.3	10.97		246.3	10.98																							15.9	15.71
	248.2	10.96		246.3	10.98																							16.1	15.7
	248.2	10.96		247.3	10.97																							16.2	15.69
	248.2	10.96		247.3	10.97																							16.2	15.69
	251	10.93		247.3	10.97																							16.3	15.68
	252.9	10.92		247.3	10.97																							16.5	15.67
	253.8	10.91		247.3	10.97																							16.6	15.67
	260.4	10.85		247.3	10.97																							16.6	15.67
	262.2	10.84		247.3	10.97																							16.7	15.66
	263.2	10.83		248.2	10.96																							16.9	15.65
	266	10.8		248.2	10.96																							16.9	15.65
	266	10.8		248.2	10.96																							17	15.64
	269.7	10.77		248.2	10.96																							17.2	15.63
	271.6	10.76		248.2	10.96																							17.2	15.63
	275.3	10.73		248.2	10.96																							17.3	15.63
	279	10.7		249.1	10.95																							17.4	15.62
	279	10.7		249.1	10.95																							17.6	15.61
	281.8	10.68		249.1	10.95																							17.7	15.6
	281.8	10.68		249.1	10.95																							17.8	15.59
	286.4	10.64		249.1	10.95																							17.9	15.59
	286.4	10.64		249.1	10.95																							18	15.58
	286.4	10.64		249.1	10.95																							18.1	15.58
	287.3	10.63		249.1	10.95																							18.3	15.57
	287.3	10.63		249.1	10.95																							18.3	15.57
	288.3	10.62		250.1	10.94																							18.4	15.56
	288.3	10.62		250.1	10.94																							18.6	15.55
	290.1	10.61		250.1	10.94																							18.6	15.55
	290.1	10.61		250.1	10.94																							18.7	15.54
	292	10.6		250.1	10.94																							18.8	15.54
	294.7	10.57		251	10.93																							19	15.53
	294.7	10.57		251	10.93																							19	15.53
	295.7	10.57		251	10.93																							19.1	15.52
	296.6	10.56		251	10.93																							19.3	15.51
	296.6	10.56		252	10.93																							19.3	15.51
	297.5	10.55		252	10.93																							19.4	15.5
	297.5	10.55		252	10.93																							19.6	15.49
	298.4	10.55		252	10.93																							19.7	15.49
	300.3	10.53		252	10.93																							19.7	15.49
	300.3	10.53		252	10.93																							19.9	15.48
	300.3	10.53		252	10.93																							20	15.47
	300.3	10.53		252	10.93																							20	15.47
	301.2	10.53		252	10.93																							20.1	15.46
	302.1	10.52		252.9	10.92																							20.3	15.45
	303	10.51		252.9	10.92																							20.4	15.45
	304.9	10.5		252.9	10.92																							20.4	15.45
	304.9	10.5		252.9	10.92																							20.6	15.44
	304.9	10.5		252.9	10.92																							20.7	15.43
	305.8	10.49		252.9	10.92																							20.8	15.43
	305.8	10.49		252.9	10.92																							20.9	15.42
	306.7	10.49		253.8	10.91																							21	15.41
	306.7	10.49		253.8	10.91																							21.1	15.41
	307.7	10.48		253.8	10.91																							21.2	15.41
	308.6	10.47		253.8	10.91																							21.3	15.4
	309.5	10.47		253.8	10.91																							21.5	15.39
	309.5	10.47		254.8	10.9																							21.6	15.38
	309.5	10.47		254.8	10.9																							21.8	15.37
	311.3	10.45		254.8	10.9																							21.9	15.37
	313.2	10.44		254.8	10.9																							22	15.36
	315.9	10.42		255.7	10.89																							22.1	15.36
	317.8	10.41		255.7	10.89																							22.2	15.35
	318.7	10.4		255.7	10.89																							22.3	15.35
	319.6	10.39		256.6	10.88																							22.4	15.34
	320.5	10.39		256.6	10.88																							22.6	15.33
	320.5	10.39		256.6	10.88																							22.6	15.33
	321.4	10.38		256.6	10.88																							22.7	15.32
	321.4	10.38		256.6	10.88																							22.9	15.32
	322.3	10.37		256.6	10.88																							23	15.31
	322.3	10.37		257.6	10.88																							23	15.31
	324.2	10.36		257.6	10.88																							23.2	15.3
	324.2	10.36		257.6	10.88																							23.4	15.29
	324.2	10.36		257.6	10.88																							23.4	15.29
	324.2	10.36		257.6	10.88																							23.5	15.28
	325.1	10.35		257.6	10.88																							23.7	15.27
	326	10.35		257.6	10.88																							23.8	15.27
	327.8	10.34		257.6	10.88																							23.8	15.27
	330.6	10.32		257.6	10.88																							24	15.26
	330.6	10.32		257.6	10.88																							24.2	15.25
	332.4	10.3		258.5	10.87																							24.2	15.25
	332.4	10.3		258.5	10.87																							24.3	15.24
	332.4	10.3		258.5	10.87																							24.5	15.23
	333.3	10.3		258.5	10.87																							24.6	15.23
	334.2	10.29		258.5	10.87																							24.6	15.23
	337	10.27		258.5	10.87																							24.8	15.22
	337.9	10.27		258.5	10.87																							25	15.21
	338.8	10.26		258.5	10.87																							25	15.21
	338.8	10.26		259.4	10.86																							25.1	15.2
	338.8	10.26		259.4	10.86																							25.3	15.19
	339.7	10.26		259.4	10.86																							25.4	15.19
	340.6	10.25		259.4	10.86																							25.5	15.19
	341.5	10.24		260.4	10.85																							25.6	15.18
	341.5	10.24		260.4	10.85																							25.8	15.17
	343.4	10.23		260.4	10.85																							25.9	15.16
	343.4	10.23		260.4	10.85																							26.1	15.15
	343.4	10.23		260.4	10.85																							26.2	15.15
	345.2	10.22		260.4	10.85																							26.3	15.14
	347	10.21		260.4	10.85																							26.4	15.14
	347.9	10.2		260.4	10.85																							26.6	15.13
	350.6	10.19		261.3	10.84																							26.6	15.13
	352.5	10.17		261.3	10.84																							26.8	15.12
	352.5	10.17		261.3	10.84																							27	15.11
	354.3	10.16		261.3	10.84																							27	15.11
	356.1	10.15		262.2	10.84																							27.1	15.1
	359.7	10.13		262.2	10.84																							27.3	15.1
	360.6	10.12		262.2	10.84																							27.4	15.09
	360.6	10.12		262.2	10.84																							27.5	15.09
	365.2	10.09		262.2	10.84																							27.6	15.08
	367	10.08		262.2	10.84																							27.8	15.07
	368.8	10.07		262.2	10.84																							27.9	15.07
	369.7	10.07		262.2	10.84																							28	15.06
	375.1	10.03		262.2	10.84																							28.2	15.05
	376	10.03		262.2	10.84																							28.3	15.05
	377.8	10.02		262.2	10.84																							28.3	15.05
	379.6	10.01		262.2	10.84																							28.5	15.04
	380.5	10		263.2	10.83																							28.7	15.03
	380.5	10		263.2	10.83																							28.7	15.03
	383.2	9.99		263.2	10.83																							28.9	15.02
	387.7	9.96		263.2	10.83																							29	15.01
	387.7	9.96		263.2	10.83																							29.1	15.01
	389.5	9.95		263.2	10.83																							29.2	15.01
	390.4	9.94		263.2	10.83																							29.4	15
	390.4	9.94		264.1	10.82																							29.6	14.99
	390.4	9.94		264.1	10.82																							29.6	14.99
	391.3	9.94		265	10.81																							29.7	14.98
	392.2	9.93		265	10.81																							29.9	14.97
	392.2	9.93		265	10.81																							30	14.97
	393.1	9.93		265	10.81																							30.1	14.97
	393.1	9.93		265	10.81																							30.3	14.96
	394	9.92		265	10.81																							30.5	14.95
	394.9	9.92		266	10.8																							30.6	14.94
	395.8	9.91		266	10.8																							30.8	14.93
	395.8	9.91		266	10.8																							30.9	14.93
	399.4	9.89		266	10.8																							31	14.92
	399.4	9.89		266	10.8																							31.2	14.92
	402.1	9.88		266	10.8																							31.3	14.91
	402.1	9.88		266	10.8																							31.4	14.91
	403	9.87		266.9	10.8																							31.5	14.9
	403	9.87		266.9	10.8																							31.7	14.89
	403.9	9.87		266.9	10.8																							31.8	14.89
	404.8	9.86		266.9	10.8																							31.9	14.88
	404.8	9.86		266.9	10.8																							32.1	14.88
	406.6	9.85		266.9	10.8																							32.3	14.87
	408.4	9.84		266.9	10.8																							32.3	14.87
	409.3	9.84		267.8	10.79																							32.5	14.86
	410.2	9.83		267.8	10.79																							32.7	14.85
	411	9.83		267.8	10.79																							32.7	14.85
	411	9.83		267.8	10.79																							32.9	14.84
	411	9.83		267.8	10.79																							33	14.83
	413.7	9.81		267.8	10.79																							33.2	14.83
	414.6	9.81		267.8	10.79																							33.2	14.83
	415.5	9.8		267.8	10.79																							33.4	14.82
	417.3	9.79		267.8	10.79																							33.6	14.81
	418.2	9.79		268.8	10.78																							33.6	14.81
	419.1	9.78		268.8	10.78																							33.8	14.8
	420	9.78		268.8	10.78																							34	14.79
	420	9.78		268.8	10.78																							34.1	14.79
	421.8	9.77		269.7	10.77																							34.2	14.79
	421.8	9.77		269.7	10.77																							34.4	14.78
	423.6	9.76		269.7	10.77																							34.6	14.77
	425.3	9.75		269.7	10.77																							34.6	14.77
	426.2	9.75		269.7	10.77																							34.8	14.76
	430.7	9.72		270.6	10.77																							35	14.75
	430.7	9.72		270.6	10.77																							35.1	14.75
	432.5	9.71		270.6	10.77																							35.2	14.75
	436.9	9.69		270.6	10.77																							35.4	14.74
	437.8	9.69		270.6	10.77																							35.5	14.73
	441.4	9.67		270.6	10.77																							35.7	14.72
	442.2	9.66		270.6	10.77																							35.9	14.71
	443.1	9.66		270.6	10.77																							36	14.71
	443.1	9.66		271.6	10.76																							36.1	14.7
	445.8	9.65		271.6	10.76																							36.3	14.7
	445.8	9.65		271.6	10.76																							36.5	14.69
	452	9.62		271.6	10.76																							36.5	14.69
	453.8	9.61		271.6	10.76																							36.7	14.68
	453.8	9.61		271.6	10.76																							36.9	14.67
	453.8	9.61		271.6	10.76																							37	14.67
	459.1	9.58		271.6	10.76																							37.1	14.66
	460	9.58		272.5	10.75																							37.3	14.66
	460	9.58		272.5	10.75																							37.5	14.65
	461.7	9.57		272.5	10.75																							37.6	14.65
	466.1	9.55		272.5	10.75																							37.8	14.64
	466.1	9.55		272.5	10.75																							38	14.63
	468.8	9.53		272.5	10.75																							38	14.63
	469.7	9.53		272.5	10.75																							38.2	14.62
	470.6	9.52		273.4	10.74																							38.4	14.61
	472.3	9.52		273.4	10.74																							38.5	14.61
	474.1	9.51		273.4	10.74																							38.6	14.61
	474.1	9.51		273.4	10.74																							38.8	14.6
	476.7	9.5		273.4	10.74																							39	14.59
	476.7	9.5		273.4	10.74																							39	14.59
				273.4	10.74																							39.2	14.58
				273.4	10.74																							39.4	14.57
				274.4	10.74																							39.5	14.57
				274.4	10.74																							39.6	14.57
				274.4	10.74																							39.8	14.56
				275.3	10.73																							40	14.55
				275.3	10.73																							40.1	14.55
				275.3	10.73																							40.2	14.54
				275.3	10.73																							40.5	14.53
				275.3	10.73																							40.6	14.53
				275.3	10.73																							40.7	14.53
				275.3	10.73																							40.9	14.52
				276.2	10.72																							41.1	14.51
				276.2	10.72																							41.3	14.5
				276.2	10.72																							41.5	14.49
				276.2	10.72																							41.6	14.49
				276.2	10.72																							41.7	14.48
				276.2	10.72																							42	14.48
				276.2	10.72																							42.2	14.47
				276.2	10.72																							42.2	14.47
				276.2	10.72																							42.4	14.46
				277.1	10.71																							42.6	14.45
				277.1	10.71																							42.7	14.45
				277.1	10.71																							42.8	14.44
				277.1	10.71																							43.1	14.44
				278.1	10.71																							43.2	14.43
				278.1	10.71																							43.3	14.43
				278.1	10.71																							43.5	14.42
				278.1	10.71																							43.7	14.41
				278.1	10.71																							43.8	14.41
				279	10.7																							44	14.4
				279	10.7																							44.2	14.39
				279.9	10.69																							44.3	14.39
				279.9	10.69																							44.4	14.39
				280.9	10.68																							44.6	14.38
				280.9	10.68																							44.9	14.37
				280.9	10.68																							44.9	14.37
				280.9	10.68																							45.1	14.36
				280.9	10.68																							45.3	14.35
				280.9	10.68																							45.5	14.35
				280.9	10.68																							45.5	14.35
				280.9	10.68																							45.8	14.34
				281.8	10.68																							46	14.33
				281.8	10.68																							46	14.33
				281.8	10.68																							46.2	14.32
				281.8	10.68																							46.5	14.31
				281.8	10.68																							46.6	14.31
				282.7	10.67																							46.7	14.31
				282.7	10.67																							46.9	14.3
				283.6	10.66																							47.2	14.29
				283.6	10.66																							47.4	14.28
				284.6	10.65																							47.6	14.27
				284.6	10.65																							47.7	14.27
				284.6	10.65																							47.9	14.26
				285.5	10.65																							48.1	14.26
				285.5	10.65																							48.3	14.25
				285.5	10.65																							48.3	14.25
				285.5	10.65																							48.6	14.24
				285.5	10.65																							48.8	14.23
				285.5	10.65																							48.9	14.23
				285.5	10.65																							49.1	14.22
				286.4	10.64																							49.3	14.22
				287.3	10.63																							49.5	14.21
				287.3	10.63																							49.5	14.21
				287.3	10.63																							49.8	14.2
				287.3	10.63																							50	14.19
				287.3	10.63																							50.1	14.19
				288.3	10.62																							50.3	14.18
				289.2	10.62																							50.5	14.17
				289.2	10.62																							50.7	14.17
				289.2	10.62																							50.8	14.17
				290.1	10.61																							51	14.16
				290.1	10.61																							51.2	14.15
				290.1	10.61																							51.3	14.15
				290.1	10.61																							51.5	14.14
				290.1	10.61																							51.7	14.13
				290.1	10.61																							51.9	14.13
				290.1	10.61																							52	14.13
				290.1	10.61																							52.2	14.12
				290.1	10.61																							52.5	14.11
				291	10.6																							52.5	14.11
				291	10.6																							52.7	14.1
				291	10.6																							53	14.09
				292	10.6																							53.1	14.09
				292	10.6																							53.3	14.09
				292	10.6																							53.5	14.08
				292	10.6																							53.8	14.07
				293.8	10.58																							54	14.06
				293.8	10.58																							54.3	14.05
				295.7	10.57																							54.4	14.05
				295.7	10.57																							54.5	14.04
				295.7	10.57																							54.8	14.04
				295.7	10.57																							55	14.03
				295.7	10.57																							55	14.03
				295.7	10.57																							55.3	14.02
				296.6	10.56																							55.6	14.01
				296.6	10.56																							55.7	14.01
				296.6	10.56																							55.8	14
				296.6	10.56																							56.1	14
				296.6	10.56																							56.3	13.99
				296.6	10.56																							56.4	13.99
				297.5	10.55																							56.6	13.98
				297.5	10.55																							56.9	13.97
				297.5	10.55																							57	13.97
				297.5	10.55																							57.2	13.96
				297.5	10.55																							57.4	13.95
				297.5	10.55																							57.6	13.95
				298.4	10.55																							57.7	13.95
				298.4	10.55																							58	13.94
				299.4	10.54																							58.2	13.93
				299.4	10.54																							58.3	13.93
				300.3	10.53																							58.5	13.92
				300.3	10.53																							58.8	13.91
				300.3	10.53																							58.9	13.91
				301.2	10.53																							59	13.91
				301.2	10.53																							59.3	13.9
				301.2	10.53																							59.6	13.89
				303	10.51																							59.6	13.89
				303	10.51																							59.9	13.88
				303	10.51																							60.1	13.87
				303	10.51																							60.3	13.87
				303	10.51																							60.4	13.87
				303	10.51																							60.7	13.86
				304	10.51																							61	13.85
				304	10.51																							61.2	13.84
				304	10.51																							61.5	13.83
				304.9	10.5																							61.6	13.83
				304.9	10.5																							61.8	13.82
				304.9	10.5																							62.1	13.82
				304.9	10.5																							62.3	13.81
				305.8	10.49																							62.4	13.81
				305.8	10.49																							62.6	13.8
				305.8	10.49																							62.9	13.79
				305.8	10.49																							63	13.79
				306.7	10.49																							63.2	13.78
				306.7	10.49																							63.5	13.78
				306.7	10.49																							63.7	13.77
				306.7	10.49																							63.8	13.77
				306.7	10.49																							64.1	13.76
				307.7	10.48																							64.4	13.75
				307.7	10.48																							64.4	13.75
				307.7	10.48																							64.7	13.74
				308.6	10.47																							64.9	13.73
				308.6	10.47																							65.2	13.73
				309.5	10.47																							65.2	13.73
				309.5	10.47																							65.5	13.72
				309.5	10.47																							65.8	13.71
				309.5	10.47																							65.9	13.71
				309.5	10.47																							66.1	13.7
				310.4	10.46																							66.4	13.69
				310.4	10.46																							66.6	13.69
				310.4	10.46																							66.7	13.69
				311.3	10.45																							67	13.68
				312.3	10.45																							67.3	13.67
				312.3	10.45																							67.3	13.67
				312.3	10.45																							67.6	13.66
				313.2	10.44																							67.9	13.65
				313.2	10.44																							68.1	13.65
				314.1	10.43																							68.2	13.65
				314.1	10.43																							68.5	13.64
				314.1	10.43																							68.8	13.63
				314.1	10.43																							69.1	13.62
				315	10.43																							69.4	13.61
				315	10.43																							69.6	13.61
				315.9	10.42																							69.7	13.6
				315.9	10.42																							70	13.6
				315.9	10.42																							70.3	13.59
				315.9	10.42																							70.3	13.59
				316.8	10.41																							70.7	13.58
				316.8	10.41																							71	13.57
				316.8	10.41																							71.1	13.57
				316.8	10.41																							71.3	13.56
				317.8	10.41																							71.6	13.56
				318.7	10.4																							71.8	13.55
				318.7	10.4																							71.9	13.55
				318.7	10.4																							72.2	13.54
				318.7	10.4																							72.5	13.53
				319.6	10.39																							72.6	13.53
				319.6	10.39																							72.9	13.52
				319.6	10.39																							73.2	13.51
				319.6	10.39																							73.4	13.51
				319.6	10.39																							73.5	13.51
				320.5	10.39																							73.8	13.5
				320.5	10.39																							74.1	13.49
				320.5	10.39																							74.2	13.49
				320.5	10.39																							74.4	13.48
				321.4	10.38																							74.8	13.47
				321.4	10.38																							75	13.47
				321.4	10.38																							75.1	13.47
				321.4	10.38																							75.4	13.46
				322.3	10.37																							75.7	13.45
				322.3	10.37																							75.8	13.45
				323.3	10.37																							76.1	13.44
				323.3	10.37																							76.4	13.43
				324.2	10.36																							76.6	13.43
				324.2	10.36																							76.7	13.43
				324.2	10.36																							77.1	13.42
				325.1	10.35																							77.4	13.41
				326	10.35																							77.7	13.4
				326	10.35																							78.1	13.39
				326	10.35																							78.2	13.39
				326	10.35																							78.4	13.38
				326.9	10.34																							78.7	13.38
				327.8	10.34																							79	13.37
				327.8	10.34																							79.1	13.37
				327.8	10.34																							79.4	13.36
				327.8	10.34																							79.7	13.35
				329.7	10.32																							79.9	13.35
				330.6	10.32																							80.1	13.34
				331.5	10.31																							80.4	13.34
				331.5	10.31																							80.7	13.33
				331.5	10.31																							80.8	13.33
				332.4	10.3																							81.1	13.32
				332.4	10.3																							81.4	13.31
				332.4	10.3																							81.5	13.31
				333.3	10.3																							81.8	13.3
				333.3	10.3																							82.1	13.29
				334.2	10.29																							82.4	13.29
				335.2	10.29																							82.5	13.29
				336.1	10.28																							82.8	13.28
				336.1	10.28																							83.2	13.27
				336.1	10.28																							83.2	13.27
				337	10.27																							83.5	13.26
				337	10.27																							83.9	13.25
				337	10.27																							84.1	13.25
				337	10.27																							84.2	13.25
				337	10.27																							84.6	13.24
				337	10.27																							84.9	13.23
				337	10.27																							85	13.23
				337	10.27																							85.3	13.22
				337.9	10.27																							85.7	13.21
				337.9	10.27																							85.9	13.21
				337.9	10.27																							86	13.21
				338.8	10.26																							86.4	13.2
				338.8	10.26																							86.7	13.19
				339.7	10.26																							87.1	13.18
				339.7	10.26																							87.5	13.17
				339.7	10.26																							87.6	13.17
				340.6	10.25																							87.8	13.16
				340.6	10.25																							88.2	13.16
				340.6	10.25																							88.5	13.15
				341.5	10.24																							88.6	13.15
				341.5	10.24																							88.9	13.14
				342.4	10.24																							89.3	13.13
				343.4	10.23																							89.4	13.13
				343.4	10.23																							89.7	13.12
				343.4	10.23																							90	13.12
				343.4	10.23																							90.4	13.11
				344.3	10.23																							90.4	13.11
				345.2	10.22																							90.8	13.1
				345.2	10.22																							91.2	13.09
				345.2	10.22																							91.3	13.09
				345.2	10.22																							91.5	13.08
				345.2	10.22																							91.9	13.07
				345.2	10.22																							92.2	13.07
				346.1	10.21																							92.3	13.07
				346.1	10.21																							92.7	13.06
				346.1	10.21																							93.1	13.05
				346.1	10.21																							93.1	13.05
				346.1	10.21																							93.5	13.04
				347	10.21																							93.8	13.03
				347	10.21																							94.1	13.03
				347	10.21																							94.2	13.03
				347.9	10.2																							94.6	13.02
				347.9	10.2																							95	13.01
				347.9	10.2																							95	13.01
				348.8	10.2																							95.4	13
				348.8	10.2																							95.8	12.99
				349.7	10.19																							96	12.99
				349.7	10.19																							96.2	12.99
				350.6	10.19																							96.6	12.98
				350.6	10.19																							97	12.97
				351.5	10.18																							97.4	12.96
				352.5	10.17																							97.8	12.95
				352.5	10.17																							97.9	12.95
				353.4	10.17																							98.1	12.94
				353.4	10.17																							98.5	12.94
				354.3	10.16																							98.9	12.93
				354.3	10.16																							98.9	12.93
				354.3	10.16																							99.4	12.92
				355.2	10.16																							99.8	12.91
				356.1	10.15																							99.9	12.91
				356.1	10.15																							100.2	12.9
				356.1	10.15																							100.6	12.9
				356.1	10.15																							100.9	12.89
				357	10.14																							101	12.89
				357	10.14																							101.4	12.88
				357	10.14																							101.8	12.87
				357	10.14																							101.9	12.87
				358.8	10.13																							102.2	12.86
				358.8	10.13																							102.6	12.85
				358.8	10.13																							102.9	12.85
				359.7	10.13																							103	12.85
				359.7	10.13																							103.4	12.84
				359.7	10.13																							103.9	12.83
				360.6	10.12																							103.9	12.83
				360.6	10.12																							104.3	12.82
				362.4	10.11																							104.7	12.81
				362.4	10.11																							105	12.81
				363.3	10.11																							105.1	12.81
				364.2	10.1																							105.5	12.8
				364.2	10.1																							106	12.79
				364.2	10.1																							106	12.79
				365.2	10.09																							106.4	12.78
				365.2	10.09																							106.8	12.77
				365.2	10.09																							107.1	12.77
				366.1	10.09																							107.3	12.77
				366.1	10.09																							107.7	12.76
				366.1	10.09																							108.1	12.75
				367	10.08																							108.5	12.74
				367.9	10.08																							109	12.73
				367.9	10.08																							109.2	12.73
				367.9	10.08																							109.4	12.72
				368.8	10.07																							109.9	12.72
				368.8	10.07																							110.3	12.71
				368.8	10.07																							110.3	12.71
				370.6	10.06																							110.7	12.7
				370.6	10.06																							111.2	12.69
				370.6	10.06																							111.3	12.69
				370.6	10.06																							111.6	12.68
				370.6	10.06																							112.1	12.68
				372.4	10.05																							112.4	12.67
				373.3	10.04																							112.5	12.67
				373.3	10.04																							113	12.66
				373.3	10.04																							113.4	12.65
				373.3	10.04																							113.5	12.65
				374.2	10.04																							113.8	12.64
				376.9	10.02																							114.3	12.63
				376.9	10.02																							114.6	12.63
				378.7	10.01																							114.8	12.63
				378.7	10.01																							115.2	12.62
				379.6	10.01																							115.7	12.61
				379.6	10.01																							115.7	12.61
				379.6	10.01																							116.1	12.6
				380.5	10																							116.6	12.59
				380.5	10																							116.9	12.59
				380.5	10																							117	12.59
				381.4	10																							117.5	12.58
				381.4	10																							118	12.57
				381.4	10																							118	12.57
				381.4	10																							118.4	12.56
				381.4	10																							118.9	12.55
				382.3	9.99																							119.2	12.55
				383.2	9.99																							119.4	12.55
				383.2	9.99																							119.8	12.54
				383.2	9.99																							120.3	12.53
				384.1	9.98																							120.8	12.52
				385	9.97																							121.3	12.51
				386.8	9.96																							121.5	12.51
				386.8	9.96																							121.7	12.5
				386.8	9.96																							122.2	12.5
				388.6	9.95																							122.6	12.49
				388.6	9.95																							122.7	12.49
				388.6	9.95																							123.2	12.48
				388.6	9.95																							123.6	12.47
				389.5	9.95																							123.8	12.47
				390.4	9.94																							124.1	12.46
				390.4	9.94																							124.6	12.46
				391.3	9.94																							125	12.45
				391.3	9.94																							125.1	12.45
				391.3	9.94																							125.6	12.44
				391.3	9.94																							126.1	12.43
				391.3	9.94																							126.2	12.43
				392.2	9.93																							126.6	12.42
				394	9.92																							127.1	12.41
				394	9.92																							127.4	12.41
				394	9.92																							127.6	12.41
				394.9	9.92																							128.1	12.4
				394.9	9.92																							128.6	12.39
				394.9	9.92																							128.7	12.39
				396.7	9.91																							129.1	12.38
				396.7	9.91																							129.6	12.37
				396.7	9.91																							129.9	12.37
				396.7	9.91																							130.1	12.37
				396.7	9.91																							130.6	12.36
				397.6	9.9																							131.1	12.35
				400.3	9.89																							131.1	12.35
				400.3	9.89																							131.6	12.34
				400.3	9.89																							132.1	12.33
				401.2	9.88																							132.4	12.33
				401.2	9.88																							132.6	12.33
				401.2	9.88																							133.1	12.32
				402.1	9.88																							133.6	12.31
				402.1	9.88																							134.2	12.3
				403	9.87																							134.7	12.29
				403.9	9.87																							134.9	12.29
				404.8	9.86																							135.2	12.28
				405.7	9.86																							135.7	12.28
				405.7	9.86																							136.2	12.27
				406.6	9.85																							136.2	12.27
				407.5	9.85																							136.8	12.26
				407.5	9.85																							137.3	12.25
				408.4	9.84																							137.5	12.25
				408.4	9.84																							137.8	12.24
				408.4	9.84																							138.4	12.24
				409.3	9.84																							138.8	12.23
				409.3	9.84																							138.9	12.23
				409.3	9.84																							139.4	12.22
				409.3	9.84																							140	12.21
				409.3	9.84																							140.1	12.21
				410.2	9.83																							140.5	12.2
				410.2	9.83																							141	12.19
				411	9.83																							141.4	12.19
				411	9.83																							141.6	12.19
				411	9.83																							142.1	12.18
				411	9.83																							142.7	12.17
				411.9	9.82																							142.8	12.17
				411.9	9.82																							143.2	12.16
				411.9	9.82																							143.8	12.15
				412.8	9.82																							144.1	12.15
				412.8	9.82																							144.3	12.15
				413.7	9.81																							144.9	12.14
				414.6	9.81																							145.4	12.13
				414.6	9.81																							145.5	12.13
				416.4	9.8																							146	12.12
				416.4	9.8																							146.5	12.11
				416.4	9.8																							146.8	12.11
				416.4	9.8																							147.1	12.11
				417.3	9.79																							147.7	12.1
				417.3	9.79																							148.2	12.09
				417.3	9.79																							148.8	12.08
				417.3	9.79																							149.4	12.07
				417.3	9.79																							149.6	12.07
				417.3	9.79																							149.9	12.06
				418.2	9.79																							150.5	12.06
				418.2	9.79																							151	12.05
				418.2	9.79																							151.1	12.05
				418.2	9.79																							151.6	12.04
				418.2	9.79																							152.2	12.03
				418.2	9.79																							152.4	12.03
				418.2	9.79																							152.8	12.02
				419.1	9.78																							153.4	12.02
				420	9.78																							153.9	12.01
				420.9	9.77																							154	12.01
				420.9	9.77																							154.5	12
				420.9	9.77																							155.1	11.99
				421.8	9.77																							155.3	11.99
				422.7	9.77																							155.7	11.98
				422.7	9.77																							156.3	11.97
				423.6	9.76																							156.7	11.97
				423.6	9.76																							156.9	11.97
				423.6	9.76																							157.5	11.96
				423.6	9.76																							158.1	11.95
				424.4	9.76																							158.2	11.95
				425.3	9.75																							158.7	11.94
				425.3	9.75																							159.3	11.93
				428	9.74																							159.7	11.93
				428.9	9.73																							159.9	11.93
				428.9	9.73																							161.2	11.91
				429.8	9.73																							162.7	11.89
				429.8	9.73																							164.2	11.87
				429.8	9.73																							165.7	11.85
				430.7	9.72																							167.2	11.83
				430.7	9.72																							168.8	11.81
				431.6	9.72																							170.4	11.79
				432.5	9.71																							171.9	11.77
				432.5	9.71																							173.5	11.75
				433.4	9.71																							175.1	11.73
				433.4	9.71																							176.7	11.71
				434.2	9.7																							178.4	11.69
				434.2	9.7																							180	11.67
				434.2	9.7																							181.7	11.65
				435.1	9.7																							183.3	11.63
				435.1	9.7																							185	11.61
				436	9.7																							186.7	11.59
				436	9.7																							188.4	11.57
				436	9.7																							190.2	11.55
				436	9.7																							191.9	11.53
				436.9	9.69																							193.7	11.51
				437.8	9.69																							195.4	11.49
				437.8	9.69																							197.2	11.47
				437.8	9.69																							199	11.45
				438.7	9.68																							200.8	11.43
				438.7	9.68																							202.7	11.41
				439.6	9.68																							204.5	11.39
				440.5	9.67																							206.4	11.37
				440.5	9.67																							208.2	11.35
				440.5	9.67																							210.1	11.33
				440.5	9.67																							212.1	11.31
				441.4	9.67																							214	11.29
				441.4	9.67																							215.9	11.27
				442.2	9.66																							217.9	11.25
				442.2	9.66																							219.9	11.23
				443.1	9.66																							221.9	11.21
				444	9.65																							223.9	11.19
				444	9.65																							225.9	11.17
				444.9	9.65																							227.9	11.15
				444.9	9.65																							230	11.13
				444.9	9.65																							232.1	11.11
				444.9	9.65																							234.2	11.09
				445.8	9.65																							236.3	11.07
				446.7	9.64																							238.4	11.05
				447.6	9.64																							240.6	11.03
				447.6	9.64																							242.7	11.01
				447.6	9.64																							244.9	10.99
				447.6	9.64																							247.1	10.97
				447.6	9.64																							249.4	10.95
				448.5	9.63																							251.6	10.93
				448.5	9.63																							253.9	10.91
				449.3	9.63																							256.2	10.89
				449.3	9.63																							258.5	10.87
				450.2	9.62																							260.8	10.85
				450.2	9.62																							263.1	10.83
				450.2	9.62																							265.5	10.81
				450.2	9.62																							267.9	10.79
				450.2	9.62																							270.3	10.77
				451.1	9.62																							272.7	10.75
				451.1	9.62																							275.2	10.73
				452	9.62																							277.6	10.71
				452	9.62																							280.1	10.69
				452	9.62																							282.6	10.67
				452	9.62																							285.2	10.65
				452.9	9.61																							287.7	10.63
				452.9	9.61																							290.3	10.61
				452.9	9.61																							292.9	10.59
				452.9	9.61																							295.5	10.57
				452.9	9.61																							298.2	10.55
				452.9	9.61																							300.8	10.53
				453.8	9.61																							303.5	10.51
				453.8	9.61																							306.3	10.49
				453.8	9.61																							309	10.47
				453.8	9.61																							311.8	10.45
				453.8	9.61																							314.6	10.43
				453.8	9.61																							317.4	10.41
				454.7	9.6																							320.2	10.39
				454.7	9.6																							323.1	10.37
				454.7	9.6																							326	10.35
				454.7	9.6																							328.9	10.33
				454.7	9.6																							331.8	10.31
				454.7	9.6																							334.8	10.29
				455.5	9.6																							337.8	10.27
				455.5	9.6																							340.8	10.25
				455.5	9.6																							343.8	10.23
				455.5	9.6																							346.9	10.21
				455.5	9.6																							350	10.19
				455.5	9.6																							353.1	10.17
				455.5	9.6																							356.3	10.15
				456.4	9.59																							359.5	10.13
				456.4	9.59																							362.7	10.11
				456.4	9.59																							365.9	10.09
				456.4	9.59																							369.2	10.07
				456.4	9.59																							372.5	10.05
				456.4	9.59																							375.9	10.03
				457.3	9.59																							379.2	10.01
				457.3	9.59																							382.6	9.99
				458.2	9.58																							386	9.97
				458.2	9.58																							389.5	9.95
				458.2	9.58																							393	9.93
				459.1	9.58																							396.5	9.91
				460	9.58																							400	9.89
				460	9.58																							403.6	9.87
				460	9.58																							407.2	9.85
				460	9.58																							410.9	9.83
				460	9.58																							414.5	9.81
				460	9.58																							418.3	9.79
				460.8	9.57																							422	9.77
				460.8	9.57																							425.8	9.75
				460.8	9.57																							429.6	9.73
				461.7	9.57																							433.4	9.71
				461.7	9.57																							437.3	9.69
				461.7	9.57																							441.2	9.67
				461.7	9.57																							445.2	9.65
				462.6	9.56																							449.2	9.63
				462.6	9.56																							453.2	9.61
				462.6	9.56																							457.3	9.59
				463.5	9.56																							461.4	9.57
				463.5	9.56																							465.5	9.55
				464.4	9.55																							469.7	9.53
				464.4	9.55																							473.9	9.51
				464.4	9.55																							478.2	9.49
				464.4	9.55																							482.5	9.47
				464.4	9.55																							486.8	9.45
				464.4	9.55																							491.2	9.43
				464.4	9.55																							495.6	9.41
				465.3	9.55																							500.1	9.39
				465.3	9.55																							504.6	9.37
				466.1	9.55																							509.1	9.35
				466.1	9.55																							513.7	9.33
				467	9.54																							518.4	9.31
				467	9.54																							523	9.29
				467	9.54																							527.7	9.27
				467	9.54																							532.5	9.25
				467	9.54																							537.3	9.23
				467.9	9.54																							542.2	9.21
				467.9	9.54																							547.1	9.19
				468.8	9.53																							552	9.17
				469.7	9.53																							557	9.15
				469.7	9.53																							562	9.13
				469.7	9.53																							567.1	9.11
				469.7	9.53																							572.3	9.09
				469.7	9.53																							577.4	9.07
				470.6	9.52																							582.7	9.05
				470.6	9.52																							588	9.03
				470.6	9.52																							593.3	9.01
				471.4	9.52																							598.7	8.99
				471.4	9.52																							604.1	8.97
				471.4	9.52																							609.6	8.95
				472.3	9.52																							615.1	8.93
				472.3	9.52																							620.7	8.91
				472.3	9.52																							626.4	8.89
				473.2	9.51																							632.1	8.87
				473.2	9.51
				473.2	9.51
[truncated: 17 more columns]

## Sheet: Figure 4
Figure 4a							Figure 4b				Figure 4c
	Black solid circles			Raman spectrum (run 7) as inset				IR red circles (12)				Color points (10)
	Pressure (GPa)	Wavenumber of vibron (cm^-1)		Raman shift (cm^-1)	Intensity (arb. Units)			Pressure (GPa)	Signal intensity (rel. units)			Pressure (GPa)	Temperature (K)
	163	3993		2099.79	641.56			324.4	84.01			218	295
	201	3904		2102.01	642.96			340.3	78.06			190	245
	221	3674		2104.22	643.66			353	72.81			153	75
	242	3463		2106.42	641.66			359.5	66.86			156	90
	255	3288		2108.63	641.96			367	64.87			158	110
	269	3148		2110.84	641.06			375.4	64.31			170	160
	271	3106		2113.05	642.86			382.3	56.73			185	229
	281	3017		2115.25	641.86			393.7	50.97			153	110
	284	2970		2117.46	643.66			403.9	41.2			156	130
	291	2934		2119.66	641.76			415.4	0.02			158	140
	301	2796		2121.87	642.06			418.6	0.22			170	174
	310	2747		2124.07	644.96							185	243
	312	2714		2126.27	642.86			IR blue circles (12)				155	120
	314	2704		2128.47	644.66			Pressure (GPa)	Signal intensity (rel. units)			164	130
				2130.68	642.16			320.7	83.65			170	140
	Black open circles			2132.88	642.46			346	77.34			184	230
	Pressure (GPa)	Wavenumber of vibron (cm^-1)		2135.07	641.76			365	66.5			190	250
	5.7	4213		2137.27	642.16			402	45.89			195	265
	65.7	4231		2139.47	643.56			402.7	35.6			197	275
	88.7	4198		2141.67	644.36							199	280
	97.7	4184		2143.86	644.66			Raman black circles (10)				204	290
	144.7	4085		2146.06	641.66			Pressure (GPa)	Signal intensity (rel. units)			206	295
	144.7	4077		2148.26	643.16			261	155			209	325
	179.7	3978		2150.45	643.36			276	195			220	293
	218.7	3800		2152.64	642.56			303	450			220	281
	257.7	3338		2154.83	643.26			307	395			230	274
	283	3057		2157.03	640.96			321	216.8			242	260
	292	2952		2159.22	642.46			325	212			240	271
	301	2840		2161.41	643.56			334	56			242	253
	319	2613		2163.6	645.16			334	76.5			252	246
	324	2521		2165.79	643.06			337	62			277	224
	338.5	2491		2167.97	642.26			337	56			314	206
	339.2	2488		2170.16	644.56			338	80			314	216
	349	2485		2172.35	645.46			339	62.4			332	200
	257.7	4120		2174.53	641.96			341	57			313	212
	283	4093		2176.72	642.36			341	57.3			337	204
	292	4077		2178.9	640.76			342	37.1			333	206
	301	4064		2181.09	642.66			342	39.9			337	206
	319	4061		2183.27	642.26			344	37.7			313	197
	324	4038		2185.45	643.36			347	36			313	207
	338.5	4022		2187.63	642.26			352	37.4			327	200
	339.2	4007		2189.81	643.46			355	38.7			344	190
	349	3996		2191.99	643.66			370	13			361	198
				2194.17	642.76			374	16.5			366	201
	Green open circles			2196.35	643.46			381	6			364	187
	Pressure (GPa)	Wavenumber of vibron (cm^-1)		2198.53	643.86			383	7.5			375	200
	152.2	4055.9		2200.7	643.76			385	6			284	223
	167.2	4022		2202.88	645.36			404	0			281	237
	180.2	3980.8		2205.06	642.96			409	0
	188.4	3959		2207.23	643.96							Color curve 1 (10)
	194.6	3934.8		2209.4	642.76							Pressure (GPa)	Temperature (K)
	202.1	3917.8		2211.58	641.76							152.4	0.4
	208.9	3891.2		2213.75	644.26							152.5	39.2
	214.4	3847.5		2215.92	644.56							153.1	75.4
	219.9	3813.6		2218.09	642.26							154.1	113.8
	219.9	3782.1		2220.26	644.06							155.7	132.8
	224	3740.9		2222.43	642.56							159.6	162.4
	225.4	3680.4		2224.6	642.06							163.1	186.2
	228.8	3653.7		2226.77	644.66							165.4	202.6
	228.8	3639.2		2228.93	642.76							169.4	226
	231.5	3607.7		2231.1	643.16							Color curve 2 (10)
	228.8	3576.2		2233.27	642.66							Pressure (GPa)	Temperature (K)
	232.2	3554.4		2235.43	643.26							80.3	28.9
	234.9	3525.3		2237.6	643.06							87.8	43.8
	237.7	3505.9		2239.76	644.46							95.6	59.1
	237.7	3505.9		2241.92	643.86							102.9	71.1
	238.4	3474.4		2244.08	642.66							112.4	85.7
	241.8	3457.5		2246.24	643.56							120.3	95.9
	242.5	3428.4		2248.4	643.66							131.3	107.5
	243.8	3411		2250.56	643.56							141.6	115.8
	248	3391.7		2252.72	642.76							149.7	119.7
	247.2	3377.1		2254.88	641.06							154.6	121.5
	248.7	3355.3		2257.04	642.76							Green circles (11)
	250.1	3345.6		2259.2	641.86							Pressure (GPa)	Temperature (K)
	252.1	3311.7		2261.35	642.66							362	197
	256.9	3289.9		2263.51	644.76							345	202.6
	259.7	3243.9		2265.66	642.86							336	204.7
	261	3219.6		2267.82	644.16							330	207.5
	263.1	3188.1		2269.97	644.76							327	211
	266.5	3144.5		2272.12	640.46							311	213
	272.7	3071.9		2274.27	643.36							300.4	218
	277.5	3023.4		2276.42	643.06							341	205
	283.6	2977.4		2278.57	643.66
	290.4	2936.2		2280.72	642.16
	293.2	2904.7		2282.87	643.16
	300	2868.3		2285.02	641.96
	304.1	2824.7		2287.17	642.46
	311.7	2778.7		2289.31	642.36
	315.1	2744.4		2291.46	639.76
	319.9	2715.3		2293.6	645.16
	324.6	2700.8		2295.75	643.66
	334.2	2679		2297.89	644.16
	343.1	2669.3		2300.03	641.46
	353.4	2659.6		2302.18	644.96
	372	2620.8		2304.32	642.36
	384.9	2611.1		2306.46	642.76
	259.7	4126.6		2308.6	646.36
	273.3	4099.9		2310.74	641.46
	285	4090.2		2312.88	645.16
	289.8	4083		2315.01	643.36
	298	4063.2		2317.15	643.06
	309.6	4055.9		2319.29	643.36
	316.4	4046.2		2321.42	643.16
	323.3	4046.2		2323.56	643.16
	338.3	4024.4		2325.69	642.86
	345.8	4024.4		2327.82	642.76
	356.9	4034.1		2329.96	643.16
	352	4000.2		2332.09	642.96
	361	4002.6		2334.22	642.46
	369.9	4007.4		2336.35	644.06
	376.7	4005		2338.48	642.26
	384.9	4017.1		2340.61	645.06
				2342.74	643.06
	Red circles			2344.87	641.96
	Pressure (GPa)	Wavenumber of vibron (cm^-1)		2346.99	641.76
	283	2992		2349.12	641.46
	283	4085		2351.24	643.86
				2353.37	644.86
				2355.49	644.76
				2357.62	644.36
				2359.74	642.26
				2361.86	643.36
				2363.98	642.26
				2366.1	642.86
				2368.22	642.86
				2370.34	642.16
				2372.46	642.46
				2374.58	643.56
				2376.69	644.46
				2378.81	642.56
				2380.92	641.56
				2383.04	642.46
				2385.15	643.26
				2387.26	641.66
				2389.38	642.56
				2391.49	644.36
				2393.6	644.76
				2395.71	643.66
				2397.82	643.26
				2399.93	641.16
				2402.04	643.26
				2404.14	641.86
				2406.25	640.66
				2408.36	643.46
				2410.46	642.76
				2412.57	642.56
				2414.67	642.86
				2416.77	642.36
				2418.88	643.56
				2420.98	643.76
				2423.08	644.46
				2425.18	643.66
				2427.28	641.86
				2429.38	645.16
				2431.48	643.56
				2433.57	642.66
				2435.67	640.76
				2437.77	642.06
				2439.86	645.56
				2441.96	645.16
				2444.05	640.66
				2446.14	642.56
				2448.24	642.56
				2450.33	642.96
				2452.42	642.16
				2454.51	642.06
				2456.6	644.16
				2458.69	641.06
				2460.78	642.26
				2462.87	643.86
				2464.95	642.06
				2467.04	642.36
				2469.12	642.36
				2471.21	642.66
				2473.29	644.76
				2475.38	642.46
				2477.46	644.06
				2479.54	644.36
				2481.62	644.06
				2483.7	645.16
				2485.78	642.46
				2487.86	641.96
				2489.94	644.16
				2492.02	644.86
				2494.1	641.66
				2496.17	643.66
				2498.25	641.16
				2500.32	642.56
				2502.4	643.56
				2504.47	641.36
				2506.54	642.76
				2508.62	643.86
				2510.69	643.76
				2512.76	644.56
				2514.83	643.36
				2516.9	644.76
				2518.97	643.76
				2521.04	643.36
				2523.1	643.46
				2525.17	643.56
				2527.24	644.06
				2529.3	644.56
				2531.37	641.36
				2533.43	642.36
				2535.49	642.86
				2537.56	644.26
				2539.62	643.06
				2541.68	643.36
				2543.74	642.96
				2545.8	643.36
				2547.86	641.96
				2549.92	643.46
				2551.97	642.46
				2554.03	645.56
				2556.09	643.46
				2558.14	643.76
				2560.2	643.06
				2562.25	645.16
				2564.31	643.86
				2566.36	643.46
				2568.41	644.36
				2570.46	645.36
				2572.51	645.26
				2574.56	642.66
				2576.61	643.36
				2578.66	645.26
				2580.71	644.36
				2582.76	643.66
				2584.81	644.16
				2586.85	641.26
				2588.9	643.76
				2590.94	644.56
				2592.99	643.16
				2595.03	643.76
				2597.07	641.76
				2599.11	642.46
				2601.16	644.46
				2603.2	644.16
				2605.24	645.66
				2607.28	642.06
				2609.31	642.66
				2611.35	643.26
				2613.39	643.36
				2615.43	643.16
				2617.46	642.86
				2619.5	645.66
				2621.53	641.96
				2623.57	642.66
				2625.6	644.86
				2627.63	643.16
				2629.66	646.16
				2631.69	644.36
				2633.72	644.46
				2635.75	644.96
				2637.78	644.56
				2639.81	644.16
				2641.84	643.66
				2643.87	643.16
				2645.89	644.36
				2647.92	643.66
				2649.94	641.06
				2651.97	643.66
				2653.99	644.86
				2656.02	644.26
				2658.04	645.56
				2660.06	642.86
				2662.08	642.56
				2664.1	643.96
				2666.12	642.96
				2668.14	642.56
				2670.16	643.76
				2672.18	642.56
				2674.19	642.96
				2676.21	644.66
				2678.23	642.96
				2680.24	645.96
				2682.25	642.26
				2684.27	641.26
				2686.28	645.26
				2688.29	642.16
				2690.31	643.56
				2692.32	645.66
				2694.33	642.16
				2696.34	643.46
				2698.35	644.06
				2700.35	643.56
				2702.36	645.66
				2704.37	643.26
				2706.38	644.96
				2708.38	643.76
				2710.39	644.76
				2712.39	645.16
				2714.39	644.86
				2716.4	644.56
				2718.4	643.16
				2720.4	644.16
				2722.4	644.46
				2724.4	644.96
				2726.4	645.86
				2728.4	643.06
				2730.4	641.56
				2732.4	643.76
				2734.4	643.06
				2736.39	644.16
				2738.39	644.86
				2740.38	645.86
				2742.38	645.96
				2744.37	643.96
				2746.36	644.26
				2748.36	643.86
				2750.35	643.06
				2752.34	643.06
				2754.33	644.06
				2756.32	644.56
				2758.31	643.86
				2760.3	644.26
				2762.29	645.36
				2764.27	644.16
				2766.26	646.16
				2768.25	642.46
				2770.23	646.06
				2772.22	643.26
				2774.2	645.66
				2776.18	644.36
				2778.17	644.46
				2780.15	645.86
				2782.13	642.36
				2784.11	644.46
				2786.09	643.56
				2788.07	644.36
				2790.05	644.36
				2792.03	644.66
				2794.01	644.06
				2795.98	645.36
				2797.96	643.06
				2799.93	644.36
				2801.91	645.46
				2803.88	644.46
				2805.86	645.36
				2807.83	644.66
				2809.8	643.86
				2811.77	645.86
				2813.74	645.86
				2815.72	645.26
				2817.68	646.06
				2819.65	643.96
				2821.62	644.26
				2823.59	644.86
				2825.56	645.06
				2827.52	645.56
				2829.49	643.76
				2831.46	645.06
				2833.42	643.26
				2835.38	644.96
				2837.35	646.76
				2839.31	644.66
				2841.27	644.46
				2843.23	645.86
				2845.19	644.16
				2847.15	645.86
				2849.11	645.76
				2851.07	646.76
				2853.03	646.26
				2854.99	646.06
				2856.94	645.56
				2858.9	644.86
				2860.86	644.46
				2862.81	645.86
				2864.77	645.06
				2866.72	646.06
				2868.67	645.16
				2870.63	645.56
				2872.58	644.66
				2874.53	643.06
				2876.48	644.46
				2878.43	646.96
				2880.38	646.76
				2882.33	645.06
				2884.27	645.06
				2886.22	644.26
				2888.17	646.36
				2890.11	644.16
				2892.06	646.06
				2894	644.76
				2895.95	644.16
				2897.89	645.66
				2899.84	644.66
				2901.78	644.96
				2903.72	647.06
				2905.66	646.46
				2907.6	647.36
				2909.54	644.56
				2911.48	643.76
				2913.42	645.86
				2915.36	644.76
				2917.29	645.46
				2919.23	644.66
				2921.17	644.46
				2923.1	646.56
				2925.04	646.76
				2926.97	645.26
				2928.9	645.56
				2930.84	645.26
				2932.77	647.16
				2934.7	647.96
				2936.63	644.46
				2938.56	646.16
				2940.49	647.26
				2942.42	643.16
				2944.35	649.16
				2946.28	645.46
				2948.2	645.46
				2950.13	644.56
				2952.06	648.26
				2953.98	647.56
				2955.91	646.66
				2957.83	645.56
				2959.75	646.76
				2961.68	646.36
				2963.6	646.86
				2965.52	644.36
				2967.44	646.16
				2969.36	647.66
				2971.28	646.26
				2973.2	645.76
				2975.12	646.96
				2977.04	643.76
				2978.95	645.76
				2980.87	647.16
				2982.79	646.56
				2984.7	648.66
				2986.62	647.06
				2988.53	647.06
				2990.44	646.76
				2992.36	645.76
				2994.27	647.36
				2996.18	646.86
				2998.09	647.16
				3000	646.46
				3001.91	644.66
				3003.82	646.26
				3005.73	645.86
				3007.64	644.96
				3009.54	647.36
				3011.45	649.06
				3013.36	647.46
				3015.26	646.36
				3017.17	645.16
				3019.07	646.46
				3020.98	645.46
				3022.88	646.36
				3024.78	644.76
				3026.68	644.76
				3028.58	646.26
				3030.48	645.56
				3032.38	647.16
				3034.28	644.46
				3036.18	645.96
				3038.08	645.26
				3039.98	646.36
				3041.87	644.86
				3043.77	645.46
				3045.67	647.56
				3047.56	644.66
				3049.46	646.76
				3051.35	646.16
				3053.24	645.26
				3055.14	643.56
				3057.03	646.76
				3058.92	645.26
				3060.81	645.86
				3062.7	646.66
				3064.59	645.46
				3066.48	644.26
				3068.37	644.16
				3070.25	645.76
				3072.14	645.06
				3074.03	646.06
				3075.91	645.66
				3077.8	645.76
				3079.68	645.66
				3081.57	646.16
				3083.45	646.56
				3085.33	645.86
				3087.22	644.96
				3089.1	646.06
				3090.98	643.46
				3092.86	646.36
				3094.74	644.26
				3096.62	645.46
				3098.5	646.66
				3100.38	645.86
				3102.25	645.56
				3104.13	648.36
				3106.01	645.06
				3107.88	646.26
				3109.76	645.86
				3111.63	644.16
				3113.51	644.56
				3115.38	645.76
				3117.25	644.56
				3119.12	643.96
				3120.99	644.46
				3122.87	645.06
				3124.74	644.06
				3126.61	645.56
				3128.47	644.96
				3130.34	645.46
				3132.21	643.96
				3134.08	644.26
				3135.94	643.16
				3137.81	644.16
				3139.68	644.46
				3141.54	645.96
				3143.41	643.96
				3145.27	645.76
				3147.13	644.46
				3148.99	644.56
				3150.86	644.56
				3152.72	643.76
				3154.58	646.06
				3156.44	645.36
				3158.3	644.86
				3160.16	644.56
				3162.02	644.06
				3163.87	643.46
				3165.73	642.96
				3167.59	644.36
				3169.44	643.16
				3171.3	644.06
				3173.15	644.16
				3175.01	643.36
				3176.86	643.16
				3178.71	644.16
				3180.57	644.16
				3182.42	643.26
				3184.27	643.66
				3186.12	642.86
				3187.97	644.76
				3189.82	645.66
				3191.67	643.26
				3193.52	644.36
				3195.36	642.66
				3197.21	642.46
				3199.06	643.06
				3200.9	644.06
				3202.75	644.06
				3204.59	642.16
				3206.44	643.86
				3208.28	643.96
				3210.12	644.76
				3211.97	644.86
				3213.81	644.46
				3215.65	643.56
				3217.49	643.46
				3219.33	644.56
				3221.17	642.06
				3223.01	643.16
				3224.85	642.96
				3226.68	644.16
				3228.52	645.26
				3230.36	645.16
				3232.19	643.46
				3234.03	642.66
				3235.86	642.66
				3237.7	643.06
				3239.53	645.16
				3241.37	642.56
				3243.2	642.16
				3245.03	641.16
				3246.86	644.66
				3248.69	644.66
				3250.52	644.86
				3252.35	644.16
				3254.18	641.56
				3256.01	643.06
				3257.84	642.16
				3259.66	644.36
				3261.49	643.06
				3263.32	642.86
				3265.14	643.76
				3266.97	642.56
				3268.79	641.46
				3270.62	641.76
				3272.44	643.76
				3274.26	643.96
				3276.08	643.86
				3277.9	643.16
				3279.73	645.66
				3281.55	641.76
				3283.37	644.16
				3285.18	641.26
				3287	641.26
				3288.82	642.76
				3290.64	642.36
				3292.46	643.26
				3294.27	643.26
				3296.09	640.36
				3297.9	639.86
				3299.72	644.16
				3301.53	641.46
				3303.35	641.66
				3305.16	642.06
				3306.97	643.76
				3308.78	639.76
				3310.59	643.46
				3312.4	641.36
				3314.21	643.66
				3316.02	642.46
				3317.83	641.06
				3319.64	641.46
				3321.45	642.96
				3323.26	642.56
				3325.06	642.76
				3326.87	643.16
				3328.67	642.66
				3330.48	641.16
				3332.28	641.46
				3334.09	641.46
				3335.89	642.16
				3337.69	642.16
				3339.49	641.86
				3341.3	644.16
				3343.1	642.56
				3344.9	643.26
				3346.7	641.26
				3348.5	641.66
				3350.29	643.96
				3352.09	641.16
				3353.89	640.56
				3355.69	640.86
				3357.48	641.76
				3359.28	642.16
				3361.07	642.46
				3362.87	641.36
				3364.66	641.56
				3366.46	642.26
				3368.25	642.26
				3370.04	642.16
				3371.83	641.66
				3373.62	640.96
				3375.42	643.36
				3377.21	643.56
				3379	643.36
				3380.78	643.26
				3382.57	642.16
				3384.36	642.06
				3386.15	640.76
				3387.93	639.86
				3389.72	642.36
				3391.51	643.46
				3393.29	640.86
				3395.08	642.86
				3396.86	642.66
				3398.64	641.56
				3400.43	641.86
				3402.21	640.96
				3403.99	642.26
				3405.77	641.86
				3407.55	643.26
				3409.33	642.86
				3411.11	641.26
				3412.89	639.86
				3414.67	640.86
				3416.45	642.36
				3418.23	643.06
				3420	641.26
				3421.78	641.46
				3423.55	641.26
				3425.33	640.36
				3427.1	642.06
				3428.88	643.06
				3430.65	640.76
				3432.42	640.76
				3434.2	641.36
				3435.97	641.26
				3437.74	643.26
				3439.51	641.66
				3441.28	642.96
				3443.05	641.56
				3444.82	641.76
				3446.59	640.46
				3448.35	642.26
				3450.12	642.76
				3451.89	641.56
				3453.65	640.36
				3455.42	640.76
				3457.19	642.46
				3458.95	641.06
				3460.71	641.96
				3462.48	641.46
				3464.24	641.56
				3466	641.46
				3467.76	642.46
				3469.53	640.46
				3471.29	641.36
				3473.05	642.96
				3474.81	641.56
				3476.57	642.36
				3478.32	641.06
				3480.08	642.56
				3481.84	641.96
				3483.6	641.86
				3485.35	639.66
				3487.11	640.56
				3488.86	642.86
				3490.62	640.16
				3492.37	642.16
				3494.13	642.76
				3495.88	642.16
				3497.63	641.76
				3499.38	639.26
				3501.14	640.36
				3502.89	640.56
				3504.64	639.96
				3506.39	640.36
				3508.14	641.76
				3509.88	640.06
				3511.63	641.06
				3513.38	641.16
				3515.13	640.16
				3516.87	641.96
				3518.62	641.36
				3520.37	642.16
				3522.11	642.26
				3523.85	641.06
				3525.6	640.76
				3527.34	639.76
				3529.08	640.96
				3530.83	639.86
				3532.57	640.36
				3534.31	640.46
				3536.05	639.86
				3537.79	640.86
				3539.53	642.46
				3541.27	642.06
				3543.01	641.36
				3544.75	641.96
				3546.48	639.66
				3548.22	639.96
				3549.96	640.46
				3551.69	640.46
				3553.43	640.66
				3555.16	641.46
				3556.9	638.96
				3558.63	639.36
				3560.36	640.26
				3562.09	640.16
				3563.83	640.26
				3565.56	641.76
				3567.29	641.16
				3569.02	640.76
				3570.75	640.46
				3572.48	641.66
				3574.21	639.36
				3575.94	640.36
				3577.66	640.06
				3579.39	639.16
				3581.12	640.56
				3582.84	640.36
				3584.57	640.06
				3586.29	640.26
				3588.02	640.86
				3589.74	640.86
				3591.47	639.56
				3593.19	640.36
				3594.91	640.66
				3596.63	639.16
				3598.35	640.16
				3600.08	640.06
				3601.8	639.66
				3603.52	639.96
				3605.23	639.86
				3606.95	640.76
				3608.67	639.36
				3610.39	639.66
				3612.11	639.96
				3613.82	639.86
				3615.54	639.66
				3617.25	638.36
				3618.97	640.76
				3620.68	640.36
				3622.4	639.46
				3624.11	639.86
				3625.82	640.46
				3627.54	639.76
				3629.25	639.36
				3630.96	639.46
				3632.67	639.96
				3634.38	640.16
				3636.09	638.66
				3637.8	640.06
				3639.51	639.56
				3641.22	639.26
				3642.92	639.26
				3644.63	638.96
				3646.34	640.46
				3648.04	638.36
				3649.75	640.76
				3651.45	639.86
				3653.16	639.66
				3654.86	639.46
				3656.56	642.06
				3658.27	640.56
				3659.97	639.46
				3661.67	640.16
				3663.37	638.46
				3665.07	639.86
				3666.77	639.26
				3668.47	639.96
				3670.17	639.46
				3671.87	639.36
				3673.57	639.76
				3675.27	637.56
				3676.97	639.76
				3678.66	640.06
				3680.36	637.76
				3682.05	638.06
				3683.75	638.16
				3685.44	637.36
				3687.14	639.86
				3688.83	640.16
				3690.52	638.66
				3692.22	638.86
				3693.91	639.66
				3695.6	639.26
				3697.29	638.06
				3698.98	639.06
				3700.67	638.26
				3702.36	638.56
				3704.05	637.76
				3705.74	637.46
				3707.42	637.96
				3709.11	639.06
				3710.8	639.26
				3712.49	639.56
				3714.17	639.76
				3715.86	637.56
				3717.54	640.16
				3719.23	637.26
				3720.91	638.06
				3722.59	639.06
				3724.27	638.66
				3725.96	638.76
				3727.64	638.06
				3729.32	640.36
				3731	638.96
				3732.68	637.86
				3734.36	639.06
				3736.04	637.36
				3737.72	638.16
				3739.4	639.46
				3741.07	638.96
				3742.75	638.96
				3744.43	638.46
				3746.1	637.06
				3747.78	639.06
				3749.45	637.36
				3751.13	638.36
				3752.8	640.06
				3754.47	638.56
				3756.15	639.76
				3757.82	639.56
				3759.49	638.16
				3761.16	638.86
				3762.83	638.16
				3764.5	636.06
				3766.17	638.96
				3767.84	638.26
				3769.51	638.26
				3771.18	637.36
				3772.85	639.26
				3774.52	639.16
				3776.18	637.96
				3777.85	637.06
				3779.52	639.06
				3781.18	637.36
				3782.85	637.56
				3784.51	637.66
				3786.17	638.66
				3787.84	638.26
				3789.5	637.36
				3791.16	637.86
				3792.82	637.56
				3794.49	638.36
				3796.15	638.16
				3797.81	638.96
				3799.47	638.16
				3801.13	638.36
				3802.78	637.76
				3804.44	638.56
				3806.1	638.16
				3807.76	638.36
				3809.41	637.06
				3811.07	638.66
				3812.73	636.96
				3814.38	637.36
				3816.04	639.86
				3817.69	637.66
				3819.34	637.26
				3821	638.26
				3822.65	637.76
				3824.3	637.76
				3825.95	638.06
				3827.61	637.36
				3829.26	638.66
				3830.91	637.26
				3832.56	638.46
				3834.21	637.16
				3835.85	637.56
				3837.5	637.96
				3839.15	638.16
				3840.8	637.46
				3842.44	637.06
				3844.09	638.26
				3845.74	637.56
				3847.38	638.56
				3849.03	638.26
				3850.67	636.66
				3852.31	638.46
				3853.96	638.36
				3855.6	637.56
				3857.24	637.36
				3858.88	639.06
				3860.53	637.66
				3862.17	637.56
				3863.81	637.96
				3865.45	638.06
				3867.09	638.46
				3868.72	637.66
				3870.36	637.96
				3872	636.66
				3873.64	638.46
				3875.27	637.76
				3876.91	636.86
				3878.55	636.96
				3880.18	637.56
				3881.82	637.56
				3883.45	637.76
				3885.08	638.56
				3886.72	637.16
				3888.35	636.96
				3889.98	638.46
				3891.62	638.46
				3893.25	638.56
				3894.88	638.06
				3896.51	639.16
				3898.14	637.86
				3899.77	638.26
				3901.4	638.66
				3903.02	637.76
				3904.65	638.36
				3906.28	638.36
				3907.91	638.06
				3909.53	636.76
				3911.16	639.26
				3912.79	637.46
				3914.41	637.96
				3916.03	637.96
				3917.66	638.66
				3919.28	638.76
				3920.91	638.26
				3922.53	637.76
				3924.15	637.06
				3925.77	637.96
				3927.39	637.46
				3929.01	636.86
				3930.63	638.36
				3932.25	637.66
				3933.87	636.76
				3935.49	638.46
				3937.11	637.76
				3938.73	635.56
				3940.34	637.26
				3941.96	638.06
				3943.58	637.06
				3945.19	636.56
				3946.81	636.96
				3948.42	637.06
				3950.04	637.36
				3951.65	636.06
				3953.26	636.76
				3954.88	636.26
				3956.49	637.86
				3958.1	637.96
				3959.71	637.66
				3961.32	638.66
				3962.93	637.56
				3964.54	636.86
				3966.15	638.46
				3967.76	637.16
				3969.37	637.86
				3970.98	637.06
				3972.59	637.26
				3974.19	637.16
				3975.8	636.66
				3977.41	636.66
				3979.01	638.56
				3980.62	637.66
				3982.22	636.96
				3983.83	637.36
				3985.43	636.56
				3987.03	637.86
				3988.64	637.46
				3990.24	637.76
				3991.84	637.46
				3993.44	637.26
				3995.04	639.66
				3996.64	636.06
				3998.24	636.46
				3999.84	636.96
				4001.44	639.16
				4003.04	638.36
				4004.64	636.56
				4006.24	638.26
				4007.83	637.46
				4009.43	636.36
				4011.03	638.16
				4012.62	638.46
				4014.22	636.96
				4015.81	637.66
				4017.41	637.46
				4019	637.56
				4020.59	638.86
				4022.18	637.36
				4023.78	637.86
				4025.37	637.96
				4026.96	637.76
				4028.55	636.76
				4030.14	639.96
				4031.73	636.16
				4033.32	638.16
				4034.91	638.36
				4036.5	638.06
				4038.09	637.96
				4039.67	637.76
				4041.26	638.06
				4042.85	639.16
				4044.43	638.96
				4046.02	639.16
				4047.6	637.56
				4049.19	638.96
				4050.77	639.06
				4052.36	637.76
				4053.94	638.16
				4055.52	639.56
				4057.11	639.86
				4058.69	636.76
				4060.27	639.16
				4061.85	638.36
				4063.43	639.56
				4065.01	639.36
				4066.59	639.16
				4068.17	638.36
				4069.75	639.56
				4071.33	639.56
				4072.9	638.16
				4074.48	639.16
				4076.06	639.16
				4077.63	637.46
				4079.21	638.86
				4080.78	640.16
				4082.36	638.76
				4083.93	637.96
				4085.51	639.06
				4087.08	637.46
				4088.65	640.06
				4090.23	637.66
				4091.8	638.76
				4093.37	637.96
				4094.94	639.46
				4096.51	638.86
				4098.08	638.96
				4099.65	639.76
				4101.22	638.46
				4102.79	638.66
				4104.36	637.86
				4105.93	637.86
				4107.49	637.16
				4109.06	636.86
				4110.63	638.36
				4112.19	637.06
				4113.76	639.06
				4115.32	639.46
				4116.89	638.06
				4118.45	637.16
				4120.02	637.36
				4121.58	640.26
				4123.14	637.76
				4124.71	636.76
				4126.27	637.46
				4127.83	637.66
				4129.39	637.06
				4130.95	635.76
				4132.51	638.56
				4134.07	638.06
				4135.63	636.46
				4137.19	638.46
				4138.75	637.86
				4140.3	638.16
				4141.86	636.86
				4143.42	636.16
				4144.97	635.46
				4146.53	637.06
				4148.08	636.26
				4149.64	636.76
				4151.19	636.46
				4152.75	637.06
				4154.3	637.16

## Sheet: Supplementary Figure 1
Supplementary Figure 1
	run 1, Raman data																		run 1, XRD data																		run 2, Raman data												run 2, XRD data
	P = 343±12 GPa			P = 405±15 GPa			P = 419±16 GPa			P = 446±19 GPa			P = 459±20 GPa			P = 477±21 GPa			P = 343±12 GPa			P = 405±15 GPa			P = 419±16 GPa			P = 446±19 GPa			P = 459±20 GPa			P = 477±21 GPa			P = 418±16 GPa			P = 425±17 GPa			P = 462±20 GPa			P = 472±21 GPa			P = 418±16 GPa
	Raman shift (cm^-1)	Intensity (arb. Units)		Raman shift (cm^-1)	Intensity (arb. Units)		Raman shift (cm^-1)	Intensity (arb. Units)		Raman shift (cm^-1)	Intensity (arb. Units)		Raman shift (cm^-1)	Intensity (arb. Units)		Raman shift (cm^-1)	Intensity (arb. Units)		2 theta (deg)	Intensity (arb. Units)		2 theta (deg)	Intensity (arb. Units)		2 theta (deg)	Intensity (arb. Units)		2 theta (deg)	Intensity (arb. Units)		2 theta (deg)	Intensity (arb. Units)		2 theta (deg)	Intensity (arb. Units)		Raman shift (cm^-1)	Intensity (arb. Units)		Raman shift (cm^-1)	Intensity (arb. Units)		Raman shift (cm^-1)	Intensity (arb. Units)		Raman shift (cm^-1)	Intensity (arb. Units)		2 theta (deg)
	1197.85	676.993		1197.85	679.556		1197.85	681.479		1197.85	684.883		1197.85	687.073		1197.85	690.67		4.99097	0.914		4.99097	748.313		4.99097	1456.75		4.99097	2156.9		4.99097	2903.1		4.99097	3586.07		1199.85	627.364		1199.85	621.922		1199.3	619.684		1199.98	614.415		4.99481
	1200.38	676.902		1200.38	679.375		1200.38	681.479		1200.38	684.701		1200.38	688.346		1200.38	689.942		5.00775	1.28651		5.00775	747.36		5.00775	1455.57		5.00775	2156.65		5.00775	2902.07		5.00775	3584.15		1200.76	626.346		1200.76	621.667		1200.21	619.956		1200.89	615.051		5.01178
	1202.91	677.084		1202.91	680.102		1202.91	682.297		1202.91	685.247		1202.91	687.164		1202.91	692.124		5.02452	1.00002		5.02452	746.639		5.02452	1457.34		5.02452	2156.33		5.02452	2902.25		5.02452	3583.22		1201.68	626.473		1201.68	621.922		1201.13	619.684		1201.81	615.142		5.02876
	1205.44	676.902		1205.44	679.556		1205.44	681.934		1205.44	684.883		1205.44	686.71		1205.44	690.215		5.0413	0.08729		5.0413	746.623		5.0413	1458.7		5.0413	2156.03		5.0413	2902.93		5.0413	3582.69		1202.59	625.836		1202.59	624.212		1202.04	619.502		1202.72	614.779		5.04573
	1207.97	677.811		1207.97	679.375		1207.97	682.661		1207.97	685.338		1207.97	687.619		1207.97	691.579		5.05807	0.52867		5.05807	745.524		5.05807	1461.54		5.05807	2156.28		5.05807	2903.37		5.05807	3585.37		1203.5	628.509		1203.5	622.685		1202.95	619.275		1203.64	614.779		5.0627
	1210.49	677.993		1210.49	679.556		1210.49	681.661		1210.49	684.156		1210.49	686.891		1210.49	690.215		5.07485	0.72191		5.07485	744.679		5.07485	1462.06		5.07485	2156.16		5.07485	2903.38		5.07485	3586.14		1204.41	626.218		1204.41	622.176		1203.87	619.547		1204.55	614.324		5.07967
	1213.02	677.811		1213.02	679.556		1213.02	682.116		1213.02	684.247		1213.02	687.8		1213.02	690.579		5.09162	0.20436		5.09162	745.629		5.09162	1460.97		5.09162	2155.32		5.09162	2903.3		5.09162	3587.32		1205.33	627.618		1205.33	620.903		1204.78	619.593		1205.47	614.779		5.09665
	1215.54	677.629		1215.54	679.92		1215.54	681.934		1215.54	684.611		1215.54	687.982		1215.54	691.124		5.10839	-0.24095		5.10839	746.641		5.10839	1458.06		5.10839	2155.21		5.10839	2903.69		5.10839	3584.58		1206.24	627.873		1206.24	623.449		1205.69	619.275		1206.38	614.96		5.11362
	1218.07	678.084		1218.07	678.556		1218.07	681.934		1218.07	685.247		1218.07	688.073		1218.07	691.124		5.12517	-0.22243		5.12517	748.409		5.12517	1455.54		5.12517	2155.69		5.12517	2903.25		5.12517	3584.91		1207.15	627.491		1207.15	621.922		1206.61	619.365		1207.3	613.96		5.13059
	1220.59	678.356		1220.59	680.011		1220.59	681.843		1220.59	684.338		1220.59	688.255		1220.59	691.76		5.14194	0.19459		5.14194	749.531		5.14194	1455.42		5.14194	2155.97		5.14194	2903.54		5.14194	3583.86		1208.06	626.855		1208.06	622.431		1207.52	619.593		1208.21	614.233		5.14756
	1223.11	677.538		1223.11	679.284		1223.11	681.661		1223.11	684.52		1223.11	687.255		1223.11	691.76		5.15872	1.67946		5.15872	749.67		5.15872	1459.59		5.15872	2155.72		5.15872	2902.92		5.15872	3584.81		1208.98	627.109		1208.98	623.703		1208.43	619.82		1209.12	614.96		5.16454
	1225.63	677.266		1225.63	679.556		1225.63	682.57		1225.63	685.701		1225.63	687.255		1225.63	691.579		5.17549	1.86233		5.17549	748.98		5.17549	1459.1		5.17549	2155.75		5.17549	2903.04		5.17549	3586.06		1209.89	627.746		1209.89	623.449		1209.35	619.411		1210.04	614.597		5.18151
	1228.15	677.902		1228.15	679.556		1228.15	682.116		1228.15	684.611		1228.15	687.891		1228.15	691.942		5.19227	1.5325		5.19227	748.994		5.19227	1456.05		5.19227	2155.57		5.19227	2903.02		5.19227	3585.42		1210.8	626.727		1210.8	621.158		1210.26	619.911		1210.95	614.597		5.19848
	1230.67	678.447		1230.67	679.829		1230.67	682.025		1230.67	684.338		1230.67	687.891		1230.67	690.76		5.20904	1.30295		5.20904	747.26		5.20904	1455.88		5.20904	2155.77		5.20904	2902.72		5.20904	3585.3		1211.71	627.491		1211.71	623.958		1211.17	619.775		1211.86	614.324		5.21546
	1233.19	677.72		1233.19	680.102		1233.19	682.479		1233.19	686.338		1233.19	687.891		1233.19	690.851		5.22582	1.41627		5.22582	746.705		5.22582	1456.64		5.22582	2155.65		5.22582	2902.54		5.22582	3584.75		1212.62	626.855		1212.62	621.667		1212.09	619.502		1212.78	614.597		5.23243
	1235.7	677.811		1235.7	678.92		1235.7	681.661		1235.7	683.429		1235.7	688.528		1235.7	691.76		5.24259	1.31934		5.24259	746.645		5.24259	1458.47		5.24259	2156.2		5.24259	2902.07		5.24259	3584.24		1213.53	627.364		1213.53	621.922		1213	619.684		1213.69	614.597		5.2494
	1238.22	677.447		1238.22	679.647		1238.22	682.297		1238.22	685.429		1238.22	688.073		1238.22	691.67		5.25936	1.27322		5.25936	746.348		5.25936	1458.77		5.25936	2156.11		5.25936	2902.33		5.25936	3585.05		1214.45	627.236		1214.45	622.94		1213.91	619.32		1214.61	615.142		5.26637
	1240.74	677.356		1240.74	679.647		1240.74	682.479		1240.74	683.611		1240.74	687.891		1240.74	690.67		5.27614	0.70815		5.27614	746.189		5.27614	1458.37		5.27614	2157.15		5.27614	2903.23		5.27614	3584.37		1215.36	627.491		1215.36	621.667		1214.82	620.138		1215.52	614.869		5.28335
	1243.25	677.72		1243.25	679.465		1243.25	681.57		1243.25	684.247		1243.25	687.437		1243.25	691.579		5.29291	0.32847		5.29291	746.417		5.29291	1457.89		5.29291	2156.96		5.29291	2903.79		5.29291	3585.35		1216.27	626.982		1216.27	621.667		1215.74	619.502		1216.43	613.96		5.30032
	1245.76	677.538		1245.76	679.102		1245.76	681.752		1245.76	685.701		1245.76	688.437		1245.76	691.397		5.30969	1.18764		5.30969	747.887		5.30969	1458.82		5.30969	2157.32		5.30969	2904.19		5.30969	3586.52		1217.18	627.236		1217.18	622.431		1216.65	619.411		1217.34	614.233		5.31729
	1248.28	677.266		1248.28	679.92		1248.28	681.752		1248.28	684.429		1248.28	688.346		1248.28	691.124		5.32646	1.50555		5.32646	748.068		5.32646	1460.55		5.32646	2157.47		5.32646	2903.8		5.32646	3586.77		1218.09	627.236		1218.09	622.431		1217.56	619.32		1218.26	615.142		5.33427
	1250.79	677.993		1250.79	680.011		1250.79	682.479		1250.79	684.701		1250.79	687.71		1250.79	689.397		5.34324	1.1946		5.34324	746.955		5.34324	1463.28		5.34324	2157.81		5.34324	2903.79		5.34324	3585.63		1219	627.109		1219	621.412		1218.47	620.275		1219.17	615.051		5.35124
	1253.3	677.902		1253.3	679.738		1253.3	682.206		1253.3	684.974		1253.3	686.528		1253.3	691.033		5.36001	0.32468		5.36001	746.759		5.36001	1465.85		5.36001	2157.72		5.36001	2903.73		5.36001	3583.59		1219.91	627.618		1219.91	622.431		1219.38	619.911		1220.08	614.96		5.36821
	1255.81	677.811		1255.81	679.102		1255.81	682.206		1255.81	684.974		1255.81	687.891		1255.81	690.942		5.37679	1.06648		5.37679	746.823		5.37679	1464.87		5.37679	2157.52		5.37679	2904.62		5.37679	3585.55		1220.82	627.236		1220.82	622.94		1220.29	619.138		1221	614.051		5.38518
	1258.32	677.629		1258.32	679.284		1258.32	681.752		1258.32	684.883		1258.32	688.982		1258.32	691.942		5.39356	0.23294		5.39356	746.037		5.39356	1462.74		5.39356	2157.59		5.39356	2903.67		5.39356	3586.74		1221.73	626.346		1221.73	622.685		1221.21	619.456		1221.91	614.324		5.40216
	1260.82	678.084		1260.82	680.284		1260.82	681.479		1260.82	684.883		1260.82	687.255		1260.82	690.397		5.41033	-0.41566		5.41033	745.672		5.41033	1460.71		5.41033	2157.99		5.41033	2903.17		5.41033	3586.11		1222.64	626.855		1222.64	623.449		1222.12	619.593		1222.82	615.051		5.41913
	1263.33	677.629		1263.33	679.92		1263.33	680.934		1263.33	685.156		1263.33	688.619		1263.33	691.76		5.42711	-0.47439		5.42711	744.962		5.42711	1459.79		5.42711	2157.81		5.42711	2902.37		5.42711	3585.51		1223.55	627.618		1223.55	622.431		1223.03	619.456		1223.73	614.688		5.4361
	1265.84	677.447		1265.84	679.738		1265.84	681.934		1265.84	685.338		1265.84	687.528		1265.84	691.397		5.44388	0.13101		5.44388	745.507		5.44388	1459.17		5.44388	2157.24		5.44388	2903.01		5.44388	3583.96		1224.46	627.109		1224.46	623.449		1223.94	619.865		1224.64	613.869		5.45308
	1268.34	677.447		1268.34	679.375		1268.34	681.479		1268.34	685.52		1268.34	688.891		1268.34	692.851		5.46066	1.08216		5.46066	746.443		5.46066	1457.24		5.46066	2156.38		5.46066	2903.87		5.46066	3584.56		1225.37	628		1225.37	621.922		1224.85	619.911		1225.56	614.597		5.47005
	1270.85	677.266		1270.85	679.738		1270.85	681.661		1270.85	685.338		1270.85	688.619		1270.85	691.124		5.47743	1.48444		5.47743	747.99		5.47743	1455.27		5.47743	2155.59		5.47743	2904.05		5.47743	3586.02		1226.28	627.364		1226.28	623.958		1225.76	620.002		1226.47	614.597		5.48702
	1273.35	678.629		1273.35	679.011		1273.35	681.752		1273.35	684.701		1273.35	688.346		1273.35	692.215		5.49421	1.40474		5.49421	749.111		5.49421	1454.61		5.49421	2155.33		5.49421	2903.92		5.49421	3586.7		1227.19	626.346		1227.19	622.431		1226.67	619.184		1227.38	615.051		5.50399
	1275.85	678.72		1275.85	679.738		1275.85	682.025		1275.85	684.338		1275.85	688.073		1275.85	691.579		5.51098	1.1101		5.51098	750.772		5.51098	1457.05		5.51098	2155.9		5.51098	2903.75		5.51098	3586.46		1228.1	627.236		1228.1	623.703		1227.58	619.547		1228.29	614.688		5.52097
	1278.35	677.447		1278.35	679.102		1278.35	682.479		1278.35	686.065		1278.35	688.073		1278.35	691.033		5.52775	0.71147		5.52775	750.8		5.52775	1461.08		5.52775	2155.73		5.52775	2903.16		5.52775	3585.11		1229.01	626.6		1229.01	622.685		1228.49	619.547		1229.2	615.051		5.53794
	1280.85	677.538		1280.85	679.738		1280.85	681.388		1280.85	684.247		1280.85	688.073		1280.85	691.579		5.54453	0.91529		5.54453	750.074		5.54453	1465.27		5.54453	2155.6		5.54453	2903.51		5.54453	3584.83		1229.92	627.491		1229.92	622.176		1229.4	619.865		1230.12	614.597		5.55491
	1283.35	677.538		1283.35	680.011		1283.35	682.297		1283.35	684.52		1283.35	688.346		1283.35	691.942		5.5613	0.94002		5.5613	747.294		5.5613	1466.05		5.5613	2156.31		5.5613	2903.39		5.5613	3585.16		1230.83	626.727		1230.83	622.94		1230.32	619.593		1231.03	614.506		5.57189
	1285.85	677.811		1285.85	679.829		1285.85	682.479		1285.85	684.611		1285.85	688.346		1285.85	691.215		5.57808	1.87124		5.57808	747.299		5.57808	1464.23		5.57808	2156.87		5.57808	2903.55		5.57808	3585.3		1231.74	627.109		1231.74	621.667		1231.23	619.32		1231.94	614.142		5.58886
	1288.35	678.629		1288.35	679.284		1288.35	681.934		1288.35	684.974		1288.35	689.073		1288.35	692.397		5.59485	1.63882		5.59485	748.349		5.59485	1461.12		5.59485	2157.08		5.59485	2902.98		5.59485	3585.51		1232.65	627.109		1232.65	622.94		1232.14	619.82		1232.85	615.233		5.60583
	1290.85	678.447		1290.85	679.738		1290.85	682.206		1290.85	684.974		1290.85	687.982		1290.85	691.306		5.61163	1.56746		5.61163	748.321		5.61163	1460.52		5.61163	2156.3		5.61163	2902.41		5.61163	3585.74		1233.56	626.6		1233.56	623.194		1233.05	619.547		1233.76	615.142		5.6228
	1293.34	678.902		1293.34	679.738		1293.34	681.934		1293.34	685.247		1293.34	688.255		1293.34	690.579		5.6284	0.80048		5.6284	747.673		5.6284	1459.6		5.6284	2155.97		5.6284	2903.6		5.6284	3585.82		1234.47	626.982		1234.47	622.176		1233.96	619.865		1234.67	614.233		5.63978
	1295.84	678.811		1295.84	679.465		1295.84	682.388		1295.84	684.883		1295.84	688.437		1295.84	693.397		5.64518	0.30629		5.64518	746.718		5.64518	1459.65		5.64518	2155.17		5.64518	2903.54		5.64518	3583.83		1235.37	626.855		1235.37	623.449		1234.87	619.638		1235.58	614.597		5.65675
	1298.33	677.447		1298.33	679.647		1298.33	682.025		1298.33	685.701		1298.33	688.073		1298.33	690.488		5.66195	0.50385		5.66195	746.839		5.66195	1458.99		5.66195	2155.25		5.66195	2903.42		5.66195	3583.38		1236.28	626.473		1236.28	623.703		1235.78	619.456		1236.49	615.142		5.67372
	1300.82	677.356		1300.82	679.193		1300.82	682.297		1300.82	683.974		1300.82	688.619		1300.82	692.124		5.67872	0.82204		5.67872	746.854		5.67872	1459.75		5.67872	2155.13		5.67872	2902.63		5.67872	3586.26		1237.19	626.855		1237.19	623.194		1236.68	619.775		1237.4	614.597		5.6907
	1303.32	677.811		1303.32	679.647		1303.32	683.025		1303.32	684.701		1303.32	688.71		1303.32	692.124		5.6955	1.452		5.6955	747.569		5.6955	1462.92		5.6955	2155.17		5.6955	2902.29		5.6955	3588.26		1238.1	626.473		1238.1	621.922		1237.59	619.365		1238.31	614.779		5.70767
	1305.81	677.902		1305.81	679.92		1305.81	682.116		1305.81	684.429		1305.81	689.437		1305.81	692.033		5.71227	2.07993		5.71227	748.284		5.71227	1466.26		5.71227	2155.49		5.71227	2902.43		5.71227	3588.47		1239.01	626.6		1239.01	622.431		1238.5	619.956		1239.22	614.597		5.72464
	1308.3	677.811		1308.3	679.465		1308.3	682.388		1308.3	685.338		1308.3	688.891		1308.3	691.215		5.72905	1.39082		5.72905	749.195		5.72905	1465.76		5.72905	2155.23		5.72905	2902.25		5.72905	3588.05		1239.92	627.491		1239.92	621.158		1239.41	619.502		1240.13	614.779		5.74161
	1310.79	678.266		1310.79	680.375		1310.79	682.116		1310.79	684.883		1310.79	689.255		1310.79	692.942		5.74582	0.86013		5.74582	748.888		5.74582	1462.22		5.74582	2155.21		5.74582	2902.19		5.74582	3587.8		1240.82	627.491		1240.82	623.194		1240.32	619.138		1241.04	615.142		5.75859
	1313.28	677.993		1313.28	680.011		1313.28	682.57		1313.28	684.611		1313.28	688.164		1313.28	690.76		5.7626	0.6746		5.7626	748.985		5.7626	1460.58		5.7626	2155.3		5.7626	2903.14		5.7626	3587.92		1241.73	626.982		1241.73	621.412		1241.23	619.638		1241.95	614.506		5.77556
	1315.76	677.447		1315.76	680.102		1315.76	682.025		1315.76	685.338		1315.76	688.437		1315.76	691.488		5.77937	1.01435		5.77937	748.94		5.77937	1456.77		5.77937	2155.2		5.77937	2903.27		5.77937	3585.62		1242.64	627.873		1242.64	620.649		1242.14	619.82		1242.86	614.779		5.79253
	1318.25	677.538		1318.25	680.102		1318.25	681.934		1318.25	685.065		1318.25	689.437		1318.25	691.851		5.79615	0.94568		5.79615	750.47		5.79615	1456.41		5.79615	2155.31		5.79615	2903.15		5.79615	3584.35		1243.55	626.727		1243.55	622.176		1243.05	619.82		1243.77	614.869		5.8095
	1320.74	678.175		1320.74	679.375		1320.74	682.025		1320.74	685.52		1320.74	688.982		1320.74	692.033		5.81292	0.95038		5.81292	751.028		5.81292	1454.32		5.81292	2155.79		5.81292	2902.98		5.81292	3585.88		1244.46	626.855		1244.46	623.194		1243.96	619.229		1244.68	614.051		5.82648
	1323.22	678.538		1323.22	680.284		1323.22	683.116		1323.22	686.338		1323.22	689.891		1323.22	692.67		5.82969	1.0076		5.82969	750.905		5.82969	1456.37		5.82969	2156.48		5.82969	2903.14		5.82969	3586.96		1245.36	627.618		1245.36	622.685		1244.87	619.956		1245.59	614.688		5.84345
	1325.71	678.993		1325.71	681.556		1325.71	683.206		1325.71	686.247		1325.71	690.619		1325.71	694.76		5.84647	0.98088		5.84647	750.31		5.84647	1459.06		5.84647	2156.77		5.84647	2903.9		5.84647	3588.25		1246.27	628.255		1246.27	622.685		1245.77	619.775		1246.5	615.142		5.86042
	1328.19	680.266		1328.19	681.738		1328.19	683.57		1328.19	687.52		1328.19	691.891		1328.19	696.124		5.86324	0.94188		5.86324	750.364		5.86324	1461.71		5.86324	2156.97		5.86324	2904.29		5.86324	3586.13		1247.18	626.727		1247.18	623.703		1246.68	619.547		1247.41	614.506		5.8774
	1330.67	685.356		1330.67	684.556		1330.67	688.843		1330.67	692.338		1330.67	699.437		1330.67	703.215		5.88002	1.04109		5.88002	748.561		5.88002	1461.33		5.88002	2156.83		5.88002	2904.68		5.88002	3585.26		1248.08	627.746		1248.08	620.903		1247.59	619.547		1248.32	614.869		5.89437
	1333.15	693.266		1333.15	691.102		1333.15	695.479		1333.15	705.338		1333.15	712.255		1333.15	721.579		5.89679	0.56448		5.89679	748.431		5.89679	1462.46		5.89679	2156.6		5.89679	2903.83		5.89679	3583.54		1248.99	627.491		1248.99	623.194		1248.5	619.502		1249.23	614.415		5.91134
	1335.63	696.266		1335.63	694.465		1335.63	699.843		1335.63	715.156		1335.63	725.71		1335.63	737.033		5.91357	0.491		5.91357	747.411		5.91357	1460.43		5.91357	2156.21		5.91357	2903.52		5.91357	3584.72		1249.9	627.236		1249.9	621.412		1249.41	619.684		1250.14	614.688		5.92831
	1338.11	694.175		1338.11	693.284		1338.11	699.57		1338.11	713.701		1338.11	725.71		1338.11	735.67		5.93034	-0.01482		5.93034	747.092		5.93034	1460.96		5.93034	2156.37		5.93034	2903.58		5.93034	3584.44		1250.81	626.218		1250.81	622.431		1250.32	619.593		1251.05	614.597		5.94529
	1340.59	690.993		1340.59	691.738		1340.59	697.661		1340.59	712.52		1340.59	720.8		1340.59	732.579		5.94711	0.39795		5.94711	745.159		5.94711	1459.56		5.94711	2157.43		5.94711	2904.33		5.94711	3586.29		1251.71	626.6		1251.71	623.194		1251.22	619.502		1251.96	615.051		5.96226
	1343.07	692.72		1343.07	691.829		1343.07	696.116		1343.07	708.338		1343.07	718.255		1343.07	729.215		5.96389	0.89424		5.96389	745.494		5.96389	1460.51		5.96389	2157.75		5.96389	2904.61		5.96389	3587.58		1252.62	627.618		1252.62	622.431		1252.13	619.502		1252.86	615.142		5.97923
	1345.54	691.447		1345.54	689.92		1345.54	695.388		1345.54	706.974		1345.54	715.437		1345.54	726.76		5.98066	1.03468		5.98066	745.497		5.98066	1460.89		5.98066	2156.2		5.98066	2904.53		5.98066	3589.16		1253.52	627.618		1253.52	621.922		1253.04	619.593		1253.77	614.96		5.99621
	1348.02	692.356		1348.02	689.284		1348.02	694.297		1348.02	704.701		1348.02	715.891		1348.02	723.942		5.99744	0.89367		5.99744	745.84		5.99744	1460.65		5.99744	2155.69		5.99744	2903.84		5.99744	3588.86		1254.43	627.873		1254.43	621.922		1253.95	620.047		1254.68	614.051		6.01318
	1350.5	689.993		1350.5	688.92		1350.5	695.116		1350.5	704.065		1350.5	715.073		1350.5	720.488		6.01421	1.07663		6.01421	746.382		6.01421	1458.29		6.01421	2155.15		6.01421	2902.89		6.01421	3586.4		1255.34	627.236		1255.34	623.449		1254.85	619.82		1255.59	614.688		6.03015
	1352.97	689.993		1352.97	690.011		1352.97	692.934		1352.97	703.701		1352.97	712.164		1352.97	718.67		6.03099	0.71996		6.03099	746.305		6.03099	1455.53		6.03099	2155.4		6.03099	2902.28		6.03099	3583.87		1256.24	626.727		1256.24	622.94		1255.76	620.002		1256.5	614.506		6.04712
	1355.44	689.629		1355.44	689.465		1355.44	692.206		1355.44	703.792		1355.44	709.71		1355.44	720.67		6.04776	1.00175		6.04776	747.939		6.04776	1456.03		6.04776	2155.51		6.04776	2902.74		6.04776	3584.02		1257.15	627.109		1257.15	623.194		1256.67	619.502		1257.41	614.324		6.0641
	1357.91	689.993		1357.91	687.647		1357.91	692.843		1357.91	702.974		1357.91	711.073		1357.91	720.124		6.06454	0.34687		6.06454	747.262		6.06454	1459.82		6.06454	2155.24		6.06454	2902.86		6.06454	3584.05		1258.06	626.855		1258.06	624.212		1257.57	619.684		1258.31	614.688		6.08107
	1360.39	688.629		1360.39	686.829		1360.39	692.116		1360.39	702.338		1360.39	710.164		1360.39	719.851		6.08131	-0.168		6.08131	745.918		6.08131	1463.01		6.08131	2155.58		6.08131	2903.14		6.08131	3585.37		1258.96	627.236		1258.96	623.194		1258.48	619.593		1259.22	615.142		6.09804
	1362.86	689.902		1362.86	688.193		1362.86	692.297		1362.86	702.883		1362.86	708.073		1362.86	717.942		6.09808	-0.15804		6.09808	746.247		6.09808	1462.48		6.09808	2155.51		6.09808	2903.22		6.09808	3586.02		1259.87	628.127		1259.87	621.667		1259.39	620.002		1260.13	614.688		6.11502
	1365.33	687.902		1365.33	687.92		1365.33	693.297		1365.33	700.792		1365.33	709.073		1365.33	714.851		6.11486	0.15144		6.11486	747.376		6.11486	1460.09		6.11486	2156.28		6.11486	2903.73		6.11486	3586.51		1260.77	626.855		1260.77	621.158		1260.3	619.547		1261.04	614.869		6.13199
	1367.79	686.811		1367.79	687.829		1367.79	692.025		1367.79	700.792		1367.79	707.8		1367.79	719.579		6.13163	0.35288		6.13163	748.783		6.13163	1458.27		6.13163	2155.63		6.13163	2904.07		6.13163	3585.79		1261.68	627.873		1261.68	623.194		1261.2	619.32		1261.95	614.415		6.14896
	1370.26	688.175		1370.26	687.92		1370.26	691.388		1370.26	701.338		1370.26	708.255		1370.26	715.124		6.14841	0.7041		6.14841	748.324		6.14841	1456.58		6.14841	2156.12		6.14841	2903.36		6.14841	3585.69		1262.58	626.727		1262.58	622.685		1262.11	620.184		1262.85	615.051		6.16593
	1372.73	688.447		1372.73	688.284		1372.73	692.025		1372.73	700.52		1372.73	708.255		1372.73	717.124		6.16518	1.67276		6.16518	748.432		6.16518	1456.57		6.16518	2155.53		6.16518	2902.88		6.16518	3585.78		1263.49	627.364		1263.49	623.194		1263.01	619.638		1263.76	614.597		6.18291
	1375.19	688.72		1375.19	687.92		1375.19	692.479		1375.19	699.611		1375.19	706.164		1375.19	715.397		6.18196	1.84137		6.18196	749.702		6.18196	1458.22		6.18196	2155.53		6.18196	2902.09		6.18196	3586.44		1264.39	627.364		1264.39	621.922		1263.92	619.911		1264.67	615.142		6.19988
	1377.66	687.175		1377.66	688.465		1377.66	692.025		1377.66	700.883		1377.66	707.437		1377.66	715.851		6.19873	1.46931		6.19873	749.72		6.19873	1458.31		6.19873	2155.98		6.19873	2902.27		6.19873	3585.25		1265.3	626.6		1265.3	622.685		1264.83	619.865		1265.57	614.506		6.21685
	1380.12	687.356		1380.12	687.829		1380.12	691.843		1380.12	699.338		1380.12	709.437		1380.12	713.851		6.21551	0.63562		6.21551	750.764		6.21551	1458.03		6.21551	2155.87		6.21551	2903.03		6.21551	3584.39		1266.2	626.982		1266.2	622.94		1265.73	619.684		1266.48	614.96		6.23383
	1382.59	687.538		1382.59	688.011		1382.59	691.843		1382.59	700.701		1382.59	706.255		1382.59	713.67		6.23228	0.30323		6.23228	749.608		6.23228	1458.78		6.23228	2156.23		6.23228	2903.65		6.23228	3584.14		1267.11	627.491		1267.11	622.176		1266.64	619.865		1267.39	614.779		6.2508
	1385.05	687.175		1385.05	688.829		1385.05	690.934		1385.05	699.974		1385.05	708.164		1385.05	715.67		6.24905	0.41447		6.24905	749.267		6.24905	1459.71		6.24905	2156.42		6.24905	2904.29		6.24905	3584.46		1268.01	627.491		1268.01	623.703		1267.54	619.456		1268.29	615.415		6.26777
	1387.51	688.175		1387.51	687.193		1387.51	691.388		1387.51	698.792		1387.51	705.891		1387.51	715.76		6.26583	-0.0706		6.26583	748.747		6.26583	1459.53		6.26583	2156.93		6.26583	2903.3		6.26583	3584.5		1268.92	626.982		1268.92	622.431		1268.45	620.002		1269.2	615.142		6.28474
	1389.97	687.175		1389.97	687.92		1389.97	692.025		1389.97	699.611		1389.97	707.8		1389.97	715.579		6.2826	0.27302		6.2826	749.514		6.2826	1460.81		6.2826	2157.26		6.2826	2903.46		6.2826	3583.96		1269.82	627.491		1269.82	622.431		1269.36	620.275		1270.11	615.142		6.30172
	1392.43	687.538		1392.43	689.375		1392.43	691.116		1392.43	700.338		1392.43	707.073		1392.43	716.67		6.29938	0.40996		6.29938	750.051		6.29938	1460.46		6.29938	2156.8		6.29938	2903.03		6.29938	3584.96		1270.73	626.727		1270.73	622.431		1270.26	620.093		1271.01	614.506		6.31869
	1394.89	687.629		1394.89	688.102		1394.89	691.297		1394.89	699.611		1394.89	707.073		1394.89	716.67		6.31615	1.09977		6.31615	749.172		6.31615	1459.2		6.31615	2156.74		6.31615	2903.52		6.31615	3583.99		1271.63	626.473		1271.63	623.449		1271.17	620.093		1271.92	614.506		6.33566
	1397.35	686.447		1397.35	687.193		1397.35	690.843		1397.35	697.156		1397.35	706.619		1397.35	714.397		6.33293	1.83166		6.33293	747.691		6.33293	1457.79		6.33293	2156.6		6.33293	2903.29		6.33293	3585.21		1272.53	626.473		1272.53	623.449		1272.07	619.593		1272.83	615.051		6.35263
	1399.8	686.175		1399.8	688.193		1399.8	691.206		1399.8	698.065		1399.8	707.255		1399.8	715.76		6.3497	2.16006		6.3497	746.342		6.3497	1456.64		6.3497	2156.98		6.3497	2904.34		6.3497	3587.38		1273.44	627.746		1273.44	622.431		1272.98	619.547		1273.73	614.869		6.36961
	1402.26	688.356		1402.26	687.375		1402.26	691.025		1402.26	698.429		1402.26	705.437		1402.26	715.579		6.36647	2.13638		6.36647	745.113		6.36647	1459.64		6.36647	2156.73		6.36647	2904.06		6.36647	3587.75		1274.34	627.746		1274.34	622.94		1273.88	619.729		1274.64	614.597		6.38658
	1404.71	686.538		1404.71	687.284		1404.71	690.388		1404.71	699.792		1404.71	706.073		1404.71	713.942		6.38325	1.03426		6.38325	745.593		6.38325	1460.73		6.38325	2156.29		6.38325	2904.11		6.38325	3586.43		1275.25	628.127		1275.25	622.431		1274.79	619.365		1275.54	614.415		6.40355
	1407.17	687.902		1407.17	688.556		1407.17	691.116		1407.17	699.701		1407.17	706.528		1407.17	714.67		6.40002	0.84299		6.40002	746.182		6.40002	1462.68		6.40002	2155.61		6.40002	2902.9		6.40002	3583.97		1276.15	627.109		1276.15	623.449		1275.69	619.456		1276.45	615.324		6.42053
	1409.62	686.902		1409.62	687.829		1409.62	690.297		1409.62	698.338		1409.62	705.073		1409.62	714.397		6.4168	0.06389		6.4168	747.972		6.4168	1459.79		6.4168	2156.24		6.4168	2902.71		6.4168	3584.15		1277.05	628.255		1277.05	621.667		1276.6	619.775		1277.36	614.597		6.4375
	1412.07	688.356		1412.07	687.284		1412.07	691.388		1412.07	700.429		1412.07	706.255		1412.07	715.306		6.43357	0.20823		6.43357	748.353		6.43357	1459.86		6.43357	2156.56		6.43357	2902.72		6.43357	3585.57		1277.96	626.982		1277.96	622.176		1277.5	619.593		1278.26	614.415		6.45447
	1414.53	686.266		1414.53	687.647		1414.53	691.934		1414.53	700.338		1414.53	706.437		1414.53	714.851		6.45035	0.56037		6.45035	749.444		6.45035	1459.71		6.45035	2157.46		6.45035	2903.87		6.45035	3586.27		1278.86	626.346		1278.86	623.703		1278.41	620.093		1279.17	614.597		6.47144
	1416.98	688.266		1416.98	688.465		1416.98	692.116		1416.98	700.247		1416.98	704.891		1416.98	715.215		6.46712	0.84103		6.46712	748.524		6.46712	1459.26		6.46712	2156.88		6.46712	2903.81		6.46712	3585.48		1279.76	626.982		1279.76	622.685		1279.31	619.593		1280.07	614.779		6.48842
	1419.43	687.447		1419.43	688.375		1419.43	691.388		1419.43	698.701		1419.43	706.619		1419.43	717.215		6.4839	0.83111		6.4839	748.007		6.4839	1457.99		6.4839	2156.4		6.4839	2903.68		6.4839	3584.14		1280.67	626.855		1280.67	621.667		1280.21	619.865		1280.98	614.869		6.50539
	1421.87	686.902		1421.87	688.375		1421.87	691.934		1421.87	700.338		1421.87	704.71		1421.87	715.306		6.50067	0.2064		6.50067	748.056		6.50067	1457.63		6.50067	2156.03		6.50067	2903.03		6.50067	3584.96		1281.57	626.855		1281.57	623.703		1281.12	619.82		1281.88	613.869		6.52236
	1424.32	687.356		1424.32	688.556		1424.32	692.57		1424.32	699.247		1424.32	706.164		1424.32	717.215		6.51744	0.26294		6.51744	748.762		6.51744	1458.11		6.51744	2155.66		6.51744	2902.96		6.51744	3587.22		1282.47	627.491		1282.47	623.703		1282.02	620.093		1282.79	614.597		6.53934
	1426.77	687.266		1426.77	688.284		1426.77	692.297		1426.77	699.883		1426.77	706.437		1426.77	715.033		6.53422	-0.07243		6.53422	749.279		6.53422	1458.65		6.53422	2155.49		6.53422	2903.5		6.53422	3586.61		1283.38	627.491		1283.38	622.176		1282.93	619.138		1283.69	614.96		6.55631
	1429.22	687.084		1429.22	687.829		1429.22	691.206		1429.22	699.974		1429.22	706.8		1429.22	715.397		6.55099	0.70385		6.55099	747.837		6.55099	1459.04		6.55099	2155.55		6.55099	2903.89		6.55099	3584.97		1284.28	627.491		1284.28	622.685		1283.83	620.047		1284.6	614.96		6.57328
	1431.66	687.447		1431.66	687.738		1431.66	692.297		1431.66	700.065		1431.66	706.346		1431.66	717.124		6.56777	0.1585		6.56777	747.57		6.56777	1460.26		6.56777	2155.75		6.56777	2903.76		6.56777	3583.75		1285.18	627.618		1285.18	622.176		1284.73	619.638		1285.5	614.233		6.59025
	1434.11	687.447		1434.11	688.556		1434.11	691.934		1434.11	700.338		1434.11	705.71		1434.11	717.033		6.58454	0.2901		6.58454	746.773		6.58454	1460.46		6.58454	2155.96		6.58454	2904.05		6.58454	3586.56		1286.08	628.255		1286.08	622.685		1285.64	619.865		1286.41	615.142		6.60723
	1436.55	687.175		1436.55	688.011		1436.55	693.025		1436.55	699.611		1436.55	705.8		1436.55	717.67		6.60132	0.35113		6.60132	748.024		6.60132	1457.42		6.60132	2155.51		6.60132	2903.22		6.60132	3587.21		1286.99	627.236		1286.99	622.94		1286.54	619.684		1287.31	615.688		6.6242
	1438.99	688.356		1438.99	688.829		1438.99	692.116		1438.99	698.974		1438.99	706.255		1438.99	717.397		6.61809	0.91658		6.61809	749.449		6.61809	1455.63		6.61809	2156.06		6.61809	2902.93		6.61809	3586.8		1287.89	627.618		1287.89	622.431		1287.44	619.729		1288.21	614.869		6.64117
	1441.43	686.993		1441.43	688.92		1441.43	691.934		1441.43	700.247		1441.43	706.982		1441.43	717.67		6.63486	0.95664		6.63486	749.552		6.63486	1456.27		6.63486	2156.12		6.63486	2902.58		6.63486	3584.88		1288.79	628.127		1288.79	623.194		1288.35	619.775		1289.12	614.96		6.65815
	1443.87	685.811		1443.87	688.829		1443.87	691.297		1443.87	700.701		1443.87	706.891		1443.87	717.033		6.65164	0.65593		6.65164	748.767		6.65164	1456.66		6.65164	2156.36		6.65164	2902.52		6.65164	3583.26		1289.69	628		1289.69	622.685		1289.25	619.638		1290.02	614.233		6.67512
	1446.31	686.72		1446.31	688.284		1446.31	692.661		1446.31	701.883		1446.31	706.619		1446.31	718.76		6.66841	0.99544		6.66841	749.857		6.66841	1459.06		6.66841	2156.71		6.66841	2903.17		6.66841	3585.96		1290.59	627.109		1290.59	623.449		1290.15	619.729		1290.93	614.506		6.69209
	1448.75	687.356		1448.75	689.284		1448.75	691.934		1448.75	700.247		1448.75	705.71		1448.75	716.942		6.68519	1.63645		6.68519	751.134		6.68519	1458.7		6.68519	2156.78		6.68519	2903.56		6.68519	3587.63		1291.5	626.855		1291.5	624.212		1291.06	619.456		1291.83	615.233		6.70906
	1451.19	687.266		1451.19	688.375		1451.19	691.752		1451.19	700.701		1451.19	707.437		1451.19	715.76		6.70196	2.78877		6.70196	750.511		6.70196	1459.68		6.70196	2157.08		6.70196	2904.38		6.70196	3589.15		1292.4	627.236		1292.4	623.703		1291.96	619.82		1292.73	614.597		6.72604
	1453.63	687.538		1453.63	689.193		1453.63	692.297		1453.63	700.792		1453.63	705.891		1453.63	719.579		6.71874	2.71382		6.71874	749.06		6.71874	1459.9		6.71874	2156.42		6.71874	2904.08		6.71874	3588.77		1293.3	627.236		1293.3	622.176		1292.86	620.093		1293.64	614.869		6.74301
	1456.06	687.811		1456.06	689.375		1456.06	691.934		1456.06	700.974		1456.06	706.982		1456.06	719.397		6.73551	2.63058		6.73551	748.954		6.73551	1460.37		6.73551	2156.3		6.73551	2902.96		6.73551	3586.92		1294.2	626.855		1294.2	623.958		1293.76	619.775		1294.54	615.324		6.75998
	1458.5	686.72		1458.5	689.375		1458.5	692.479		1458.5	701.611		1458.5	707.255		1458.5	716.851		6.75229	2.26462		6.75229	748.624		6.75229	1461.22		6.75229	2156.59		6.75229	2902.6		6.75229	3586.39		1295.1	627.746		1295.1	623.958		1294.67	619.593		1295.44	614.324		6.77696
	1460.93	686.538		1460.93	690.647		1460.93	691.934		1460.93	702.156		1460.93	707.71		1460.93	719.397		6.76906	2.64271		6.76906	749.243		6.76906	1461.37		6.76906	2157.07		6.76906	2902.67		6.76906	3585.14		1296	628.127		1296	624.212		1295.57	619.911		1296.35	614.597		6.79393
	1463.37	687.811		1463.37	690.011		1463.37	692.934		1463.37	700.974		1463.37	707.164		1463.37	719.851		6.78583	3.59459		6.78583	748.202		6.78583	1460.11		6.78583	2156.92		6.78583	2903.19		6.78583	3585.89		1296.9	626.473		1296.9	623.958		1296.47	619.956		1297.25	615.051		6.8109
	1465.8	687.902		1465.8	691.011		1465.8	693.025		1465.8	701.883		1465.8	707.073		1465.8	719.397		6.80261	3.1419		6.80261	747.945		6.80261	1457.19		6.80261	2155.4		6.80261	2903.2		6.80261	3586.85		1297.8	627.491		1297.8	621.922		1297.37	620.138		1298.15	615.233		6.82787
	1468.23	687.266		1468.23	689.829		1468.23	692.934		1468.23	701.338		1468.23	708.982		1468.23	721.215		6.81938	3.4816		6.81938	748.254		6.81938	1459.38		6.81938	2155.19		6.81938	2903.18		6.81938	3588.12		1298.71	627.746		1298.71	622.431		1298.28	619.638		1299.06	614.96		6.84485
	1470.66	688.447		1470.66	690.647		1470.66	692.116		1470.66	700.883		1470.66	707.982		1470.66	720.033		6.83616	3.04627		6.83616	749.11		6.83616	1463.6		6.83616	2155.5		6.83616	2903.87		6.83616	3589.05		1299.61	627.109		1299.61	621.922		1299.18	619.775		1299.96	614.506		6.86182
	1473.09	687.175		1473.09	689.193		1473.09	692.843		1473.09	700.611		1473.09	708.528		1473.09	719.579		6.85293	3.04636		6.85293	749.913		6.85293	1465.37		6.85293	2157.05		6.85293	2903.94		6.85293	3589.59		1300.51	627.618		1300.51	623.449		1300.08	619.956		1300.86	614.415		6.87879
	1475.52	687.72		1475.52	689.193		1475.52	693.843		1475.52	702.429		1475.52	706.982		1475.52	720.215		6.86971	2.47669		6.86971	749.898		6.86971	1465.66		6.86971	2158.31		6.86971	2903.98		6.86971	3589.47		1301.41	626.855		1301.41	622.685		1300.98	619.911		1301.77	615.415		6.89576
	1477.95	687.175		1477.95	690.284		1477.95	693.479		1477.95	701.974		1477.95	709.073		1477.95	721.942		6.88648	2.0439		6.88648	749.293		6.88648	1463.94		6.88648	2158.86		6.88648	2903.81		6.88648	3589.1		1302.31	628.255		1302.31	623.449		1301.88	619.82		1302.67	614.506		6.91274
	1480.38	687.629		1480.38	690.738		1480.38	694.116		1480.38	699.974		1480.38	707.891		1480.38	722.942		6.90326	2.47041		6.90326	749.86		6.90326	1464.01		6.90326	2159.19		6.90326	2904.8		6.90326	3589.61		1303.21	627.109		1303.21	623.703		1302.78	619.684		1303.57	615.051		6.92971
	1482.81	687.447		1482.81	690.647		1482.81	694.57		1482.81	703.429		1482.81	708.255		1482.81	721.67		6.92003	2.78165		6.92003	749.467		6.92003	1461.6		6.92003	2158.79		6.92003	2905.11		6.92003	3589.35		1304.11	627.618		1304.11	622.431		1303.68	619.547		1304.47	614.597		6.94668
	1485.23	688.72		1485.23	690.738		1485.23	693.388		1485.23	702.792		1485.23	708.164		1485.23	725.124		6.9368	3.02104		6.9368	750.173		6.9368	1463.48		6.9368	2157.59		6.9368	2904.68		6.9368	3591.26		1305.01	627.491		1305.01	623.194		1304.59	619.684		1305.37	614.779		6.96366
	1487.66	687.538		1487.66	690.92		1487.66	694.297		1487.66	703.701		1487.66	708.437		1487.66	725.397		6.95358	2.27776		6.95358	748.303		6.95358	1462.76		6.95358	2156.77		6.95358	2903.66		6.95358	3590.43		1305.91	628		1305.91	624.467		1305.49	619.865		1306.28	615.233		6.98063
	1490.08	686.72		1490.08	690.556		1490.08	693.752		1490.08	702.792		1490.08	709.073		1490.08	724.124		6.97035	2.37223		6.97035	746.919		6.97035	1464.77		6.97035	2156.56		6.97035	2904.22		6.97035	3588.86		1306.81	627.109		1306.81	622.94		1306.39	619.456		1307.18	614.506		6.9976
	1492.5	686.811		1492.5	690.284		1492.5	693.661		1492.5	701.974		1492.5	708.982		1492.5	722.579		6.98713	2.5903		6.98713	747.005		6.98713	1463.8		6.98713	2157.46		6.98713	2904.56		6.98713	3587.68		1307.71	627.746		1307.71	623.958		1307.29	620.365		1308.08	615.233		7.01457
	1494.93	687.538		1494.93	690.829		1494.93	693.479		1494.93	702.701		1494.93	708.619		1494.93	723.215		7.0039	2.68071		7.0039	747.421		7.0039	1461.95		7.0039	2158.01		7.0039	2904.85		7.0039	3587.74		1308.61	627.491		1308.61	622.431		1308.19	620.184		1308.98	615.597		7.03155
	1497.35	687.356		1497.35	689.647		1497.35	693.297		1497.35	702.429		1497.35	708.982		1497.35	723.124		7.02068	3.08663		7.02068	748.555		7.02068	1460.32		7.02068	2158.49		7.02068	2904.78		7.02068	3589.89		1309.51	627.236		1309.51	623.449		1309.09	620.32		1309.88	614.96		7.04852
	1499.77	686.72		1499.77	690.102		1499.77	694.025		1499.77	703.974		1499.77	708.528		1499.77	724.76		7.03745	1.62529		7.03745	749.227		7.03745	1458.47		7.03745	2158.13		7.03745	2904.78		7.03745	3590.82		1310.41	626.727		1310.41	622.94		1309.99	620.047		1310.79	615.869		7.06549
	1502.19	687.811		1502.19	689.738		1502.19	694.388		1502.19	703.883		1502.19	709.164		1502.19	724.851		7.05422	0.46628		7.05422	748.382		7.05422	1457.71		7.05422	2157.76		7.05422	2904.54		7.05422	3588.89		1311.31	628		1311.31	622.685		1310.89	619.82		1311.69	615.597		7.08247
	1504.61	686.811		1504.61	691.738		1504.61	693.934		1504.61	703.883		1504.61	710.8		1504.61	724.033		7.071	-0.25946		7.071	747.717		7.071	1458.64		7.071	2158.19		7.071	2904.23		7.071	3587.34		1312.2	628.509		1312.2	624.212		1311.79	620.229		1312.59	615.688		7.09944
	1507.02	687.266		1507.02	690.556		1507.02	694.116		1507.02	703.247		1507.02	709.528		1507.02	725.67		7.08777	0.56894		7.08777	746.898		7.08777	1461.08		7.08777	2157.89		7.08777	2905.41		7.08777	3585.35		1313.1	627.618		1313.1	622.176		1312.69	620.275		1313.49	614.96		7.11641
	1509.44	687.629		1509.44	691.829		1509.44	694.025		1509.44	702.611		1509.44	710.8		1509.44	726.76		7.10455	1.00342		7.10455	746.322		7.10455	1463.78		7.10455	2157.58		7.10455	2905.38		7.10455	3586.53		1314	627.618		1314	622.94		1313.59	620.093		1314.39	615.233		7.13338
	1511.86	687.538		1511.86	692.375		1511.86	694.025		1511.86	704.429		1511.86	710.982		1511.86	727.306		7.12132	1.29002		7.12132	747.252		7.12132	1464.14		7.12132	2156.42		7.12132	2904.38		7.12132	3587.71		1314.9	628		1314.9	622.94		1314.49	620.229		1315.29	615.415		7.15036
	1514.27	688.538		1514.27	691.465		1514.27	694.025		1514.27	704.792		1514.27	709.255		1514.27	724.215		7.1381	1.08443		7.1381	748.206		7.1381	1463.95		7.1381	2155.51		7.1381	2903.28		7.1381	3586.99		1315.8	627.364		1315.8	621.922		1315.39	619.911		1316.19	615.324		7.16733
	1516.69	687.084		1516.69	690.556		1516.69	694.843		1516.69	704.52		1516.69	710.164		1516.69	726.397		7.15487	1.36168		7.15487	748.338		7.15487	1462.86		7.15487	2155.87		7.15487	2903.89		7.15487	3587.24		1316.7	627.873		1316.7	623.449		1316.29	619.956		1317.09	615.779		7.1843
	1519.1	687.629		1519.1	691.738		1519.1	695.116		1519.1	704.065		1519.1	710.982		1519.1	727.942		7.17165	0.90275		7.17165	748.191		7.17165	1460.16		7.17165	2155.86		7.17165	2904.02		7.17165	3586.08		1317.6	627.618		1317.6	622.685		1317.19	619.956		1317.99	615.324		7.20128
	1521.51	686.538		1521.51	692.102		1521.51	696.752		1521.51	705.247		1521.51	711.255		1521.51	725.76		7.18842	0.36506		7.18842	747.604		7.18842	1456.15		7.18842	2156.39		7.18842	2903.92		7.18842	3585.83		1318.5	626.982		1318.5	622.431		1318.09	620.502		1318.89	615.415		7.21825
	1523.92	687.72		1523.92	690.375		1523.92	694.934		1523.92	703.429		1523.92	710.891		1523.92	725.306		7.20519	0.2863		7.20519	747.102		7.20519	1455.2		7.20519	2156.46		7.20519	2903.51		7.20519	3586.78		1319.39	627.618		1319.39	623.449		1318.99	620.275		1319.79	615.96		7.23522
	1526.33	689.084		1526.33	691.011		1526.33	695.934		1526.33	704.883		1526.33	710.982		1526.33	728.67		7.22197	0.11966		7.22197	745.612		7.22197	1456.65		7.22197	2156.49		7.22197	2902.66		7.22197	3588.68		1320.29	628.636		1320.29	623.703		1319.89	620.229		1320.69	615.688		7.25219
	1528.74	686.993		1528.74	692.284		1528.74	694.934		1528.74	704.974		1528.74	708.982		1528.74	728.579		7.23874	0.09278		7.23874	746.888		7.23874	1455.97		7.23874	2156.74		7.23874	2902.5		7.23874	3588.7		1321.19	628.127		1321.19	625.74		1320.79	620.775		1321.59	615.597		7.26917
	1531.15	688.084		1531.15	691.647		1531.15	694.479		1531.15	704.156		1531.15	711.437		1531.15	729.033		7.25552	0.49535		7.25552	747.555		7.25552	1455.07		7.25552	2157.61		7.25552	2902.72		7.25552	3587.83		1322.09	628.891		1322.09	623.449		1321.69	621.002		1322.49	615.506		7.28614
	1533.56	687.266		1533.56	692.284		1533.56	695.57		1533.56	706.247		1533.56	711.437		1533.56	729.033		7.27229	0.865		7.27229	747.71		7.27229	1454.34		7.27229	2157.36		7.27229	2903.17		7.27229	3586.28		1322.99	628		1322.99	624.467		1322.59	620.547		1323.39	616.051		7.30311
	1535.97	687.266		1535.97	691.738		1535.97	695.388		1535.97	705.247		1535.97	711.619		1535.97	730.124		7.28907	0.92149		7.28907	746.574		7.28907	1456.51		7.28907	2157.26		7.28907	2903.54		7.28907	3586.27		1323.88	628.764		1323.88	624.212		1323.49	620.229		1324.29	616.597		7.32009
	1538.38	687.538		1538.38	692.556		1538.38	697.025		1538.38	706.338		1538.38	710.891		1538.38	728.488		7.30584	0.52523		7.30584	747.421		7.30584	1459.31		7.30584	2156.51		7.30584	2903.92		7.30584	3587.57		1324.78	628.636		1324.78	625.231		1324.38	621.093		1325.19	616.597		7.33706
	1540.78	688.538		1540.78	692.829		1540.78	695.57		1540.78	702.701		1540.78	710.073		1540.78	731.033		7.32262	1.34856		7.32262	748.664		7.32262	1460.23		7.32262	2157.14		7.32262	2903.94		7.32262	3589.16		1325.68	628.509		1325.68	623.703		1325.28	620.775		1326.09	616.597		7.35403
	1543.19	687.72		1543.19	691.92		1543.19	697.116		1543.19	705.883		1543.19	710.891		1543.19	730.67		7.33939	1.83249		7.33939	748.458		7.33939	1459.98		7.33939	2156.87		7.33939	2903.86		7.33939	3588.88		1326.58	628.636		1326.58	625.994		1326.18	620.956		1326.99	617.142		7.371
	1545.59	687.266		1545.59	691.465		1545.59	695.297		1545.59	705.883		1545.59	709.891		1545.59	730.579		7.35616	1.41094		7.35616	748.698		7.35616	1459.84		7.35616	2156.49		7.35616	2903.49		7.35616	3588.11		1327.47	628.509		1327.47	623.449		1327.08	621.865		1327.89	617.869		7.38798
	1547.99	686.993		1547.99	692.829		1547.99	695.479		1547.99	704.429		1547.99	710.164		1547.99	726.033		7.37294	0.75772		7.37294	749.007		7.37294	1461.12		7.37294	2155.92		7.37294	2903.81		7.37294	3588.3		1328.37	629.273		1328.37	627.012		1327.98	621.865		1328.79	618.415		7.40495
	1550.4	687.266		1550.4	691.738		1550.4	695.843		1550.4	703.611		1550.4	711.437		1550.4	728.67		7.38971	0.13759		7.38971	749.444		7.38971	1460.73		7.38971	2156.93		7.38971	2903.74		7.38971	3589.53		1329.27	629.273		1329.27	625.485		1328.88	622.411		1329.69	619.869		7.42192
	1552.8	687.72		1552.8	692.102		1552.8	697.116		1552.8	704.974		1552.8	711.619		1552.8	729.306		7.40649	-0.24449		7.40649	749.21		7.40649	1460.58		7.40649	2157.68		7.40649	2904.25		7.40649	3589.65		1330.17	631.182		1330.17	624.722		1329.77	624.365		1330.59	624.597		7.4389
	1555.2	687.629		1555.2	692.375		1555.2	696.479		1555.2	705.792		1555.2	710.619		1555.2	729.306		7.42326	0.05975		7.42326	748.236		7.42326	1459.85		7.42326	2157.39		7.42326	2904.16		7.42326	3588.27		1331.06	633.982		1331.06	629.812		1330.67	626.547		1331.49	630.779		7.45587
	1557.6	686.084		1557.6	692.284		1557.6	696.116		1557.6	706.065		1557.6	711.255		1557.6	729.942		7.44004	0.26534		7.44004	748.381		7.44004	1458.93		7.44004	2156.57		7.44004	2903.52		7.44004	3587.26		1331.96	640.855		1331.96	639.231		1331.57	632.82		1332.39	642.506		7.47284
	1560	686.72		1560	691.556		1560	696.116		1560	705.52		1560	712.346		1560	728.76		7.45681	0.73122		7.45681	748.311		7.45681	1459.05		7.45681	2154.77		7.45681	2903.36		7.45681	3586.79		1332.86	650.146		1332.86	647.631		1332.47	641.911		1333.29	649.415		7.48981
	1562.39	687.266		1562.39	691.647		1562.39	695.934		1562.39	707.156		1562.39	711.346		1562.39	727.942		7.47358	1.12548		7.47358	747.738		7.47358	1458.09		7.47358	2154.98		7.47358	2903		7.47358	3587.18		1333.75	660.455		1333.75	654.249		1333.37	651.684		1334.19	656.506		7.50679
	1564.79	688.084		1564.79	693.465		1564.79	697.661		1564.79	706.247		1564.79	711.71		1564.79	730.488		7.49036	1.07242		7.49036	747.775		7.49036	1458.77		7.49036	2154.95		7.49036	2903.02		7.49036	3586.97		1334.65	667.836		1334.65	659.594		1334.26	657.093		1335.08	660.051		7.52376
	1567.19	686.993		1567.19	690.829		1567.19	696.479		1567.19	705.974		1567.19	712.346		1567.19	727.397		7.50713	0.79687		7.50713	748.059		7.50713	1459.6		7.50713	2155.77		7.50713	2902.76		7.50713	3588.51		1335.54	670.891		1335.54	665.958		1335.16	662.956		1335.98	661.233		7.54073
	1569.58	687.084		1569.58	692.375		1569.58	698.025		1569.58	706.974		1569.58	710.982		1569.58	729.124		7.52391	0.3527		7.52391	748.27		7.52391	1461.84		7.52391	2155.44		7.52391	2903.4		7.52391	3588.19		1336.44	673.309		1336.44	667.485		1336.06	665.002		1336.88	663.233		7.5577
	1571.98	685.629		1571.98	692.556		1571.98	696.206		1571.98	707.247		1571.98	710.8		1571.98	728.215		7.54068	0.43995		7.54068	748.123		7.54068	1462.45		7.54068	2154.89		7.54068	2904.31		7.54068	3588.31		1337.34	672.164		1337.34	669.776		1336.96	666.002		1337.78	661.869		7.57468
	1574.37	685.902		1574.37	694.011		1574.37	696.479		1574.37	706.338		1574.37	711.71		1574.37	728.397		7.55746	0.70106		7.55746	746.462		7.55746	1460.92		7.55746	2155.58		7.55746	2905.69		7.55746	3588.57		1338.23	671.4		1338.23	669.012		1337.85	666.365		1338.68	662.96		7.59165
	1576.76	687.175		1576.76	692.738		1576.76	695.934		1576.76	706.974		1576.76	710.255		1576.76	728.397		7.57423	0.99263		7.57423	746.587		7.57423	1458.65		7.57423	2156.97		7.57423	2906.18		7.57423	3589.18		1339.13	671.4		1339.13	667.994		1338.75	664.911		1339.57	661.051		7.60862
	1579.15	687.175		1579.15	692.193		1579.15	696.934		1579.15	707.338		1579.15	712.073		1579.15	730.306		7.59101	1.43871		7.59101	747.2		7.59101	1459.48		7.59101	2157.37		7.59101	2905.81		7.59101	3589.29		1340.02	670.891		1340.02	665.703		1339.65	664.502		1340.47	658.233		7.6256
	1581.54	686.084		1581.54	691.92		1581.54	697.206		1581.54	707.52		1581.54	713.528		1581.54	729.397		7.60778	1.23209		7.60778	748.231		7.60778	1461.15		7.60778	2157.1		7.60778	2904.72		7.60778	3587.32		1340.92	668.091		1340.92	663.667		1340.54	663.82		1341.37	659.415		7.64257
	1583.93	685.356		1583.93	691.647		1583.93	695.661		1583.93	707.338		1583.93	712.164		1583.93	730.033		7.62455	1.25012		7.62455	747.241		7.62455	1462.03		7.62455	2156.71		7.62455	2903.61		7.62455	3588.08		1341.82	668.091		1341.82	662.649		1341.44	663.138		1342.27	660.051		7.65954
	1586.32	687.538		1586.32	691.92		1586.32	695.934		1586.32	707.156		1586.32	713.073		1586.32	730.124		7.64133	1.01796		7.64133	745.585		7.64133	1460.19		7.64133	2156.84		7.64133	2902.56		7.64133	3587.28		1342.71	668.727		1342.71	666.212		1342.34	662.32		1343.17	660.96		7.67651
	1588.71	686.538		1588.71	691.738		1588.71	696.116		1588.71	707.792		1588.71	710.619		1588.71	727.397		7.6581	0.68278		7.6581	745.118		7.6581	1458.77		7.6581	2156.85		7.6581	2902.92		7.6581	3586.19		1343.61	667.327		1343.61	662.649		1343.23	661.365		1344.06	656.96		7.69349
	1591.1	686.266		1591.1	691.375		1591.1	696.843		1591.1	707.247		1591.1	712.346		1591.1	725.579		7.67488	0.79384		7.67488	745.97		7.67488	1458.98		7.67488	2156.74		7.67488	2903.67		7.67488	3584.23		1344.5	665.291		1344.5	663.412		1344.13	660.275		1344.96	653.506		7.71046
	1593.49	685.356		1593.49	691.647		1593.49	697.661		1593.49	706.156		1593.49	708.528		1593.49	728.306		7.69165	0.8392		7.69165	747.648		7.69165	1459.46		7.69165	2156.75		7.69165	2905.19		7.69165	3584.9		1345.4	665.291		1345.4	661.631		1345.03	659.184		1345.86	655.506		7.72743
	1595.87	685.175		1595.87	692.647		1595.87	696.752		1595.87	706.247		1595.87	712.346		1595.87	729.67		7.70843	0.87029		7.70843	746.75		7.70843	1457.09		7.70843	2156.97		7.70843	2904.63		7.70843	3584.96		1346.29	662.873		1346.29	660.612		1345.92	658.82		1346.75	655.506		7.74441
	1598.26	686.084		1598.26	692.193		1598.26	697.025		1598.26	706.701		1598.26	712.255		1598.26	726.215		7.7252	0.35049		7.7252	746.262		7.7252	1454.89		7.7252	2156.95		7.7252	2904.55		7.7252	3586.88		1347.19	663.636		1347.19	659.594		1346.82	658.865		1347.65	655.324		7.76138
	1600.64	685.447		1600.64	691.465		1600.64	697.025		1600.64	707.611		1600.64	712.164		1600.64	728.215		7.74198	-0.46186		7.74198	746.79		7.74198	1455.13		7.74198	2157.34		7.74198	2904.15		7.74198	3587.44		1348.08	662.746		1348.08	657.303		1347.71	658.229		1348.55	655.324		7.77835
	1603.02	686.993		1603.02	691.829		1603.02	696.388		1603.02	705.065		1603.02	713.073		1603.02	727.215		7.75875	-1.41423		7.75875	748.067		7.75875	1456.67		7.75875	2157.08		7.75875	2904.26		7.75875	3587.61		1348.98	663.127		1348.98	659.594		1348.61	657.684		1349.44	656.506		7.79532
	1605.41	685.811		1605.41	692.829		1605.41	696.661		1605.41	706.883		1605.41	711.073		1605.41	728.942		7.77552	-1.51566		7.77552	747.877		7.77552	1455.53		7.77552	2157.17		7.77552	2903.81		7.77552	3587.45		1349.87	659.564		1349.87	657.049		1349.5	657.184		1350.34	653.142		7.8123
	1607.79	685.356		1607.79	692.465		1607.79	696.661		1607.79	706.611		1607.79	713.8		1607.79	726.851		7.7923	-1.1453		7.7923	747.93		7.7923	1452.74		7.7923	2157.29		7.7923	2904.13		7.7923	3587.36		1350.76	659.946		1350.76	656.794		1350.4	657.093		1351.24	651.506		7.82927
	1610.17	684.72		1610.17	690.375		1610.17	695.752		1610.17	705.429		1610.17	712.982		1610.17	728.306		7.80907	-0.37001		7.80907	746.312		7.80907	1452.28		7.80907	2157.15		7.80907	2904.46		7.80907	3586.68		1351.66	661.6		1351.66	660.612		1351.3	654.911		1352.13	651.779		7.84624
	1612.55	684.993		1612.55	691.375		1612.55	695.934		1612.55	705.883		1612.55	712.528		1612.55	727.67		7.82585	0.1472		7.82585	745.921		7.82585	1454.06		7.82585	2157.05		7.82585	2904.19		7.82585	3587.17		1352.55	660.582		1352.55	655.012		1352.19	655.002		1353.03	651.233		7.86322
	1614.93	684.993		1614.93	691.284		1614.93	696.934		1614.93	707.701		1614.93	712.71		1614.93	727.215		7.84262	-0.24578		7.84262	744.012		7.84262	1454.65		7.84262	2155.55		7.84262	2903.29		7.84262	3586.06		1353.45	660.455		1353.45	656.54		1353.09	654.865		1353.93	651.779		7.88019
	1617.31	685.811		1617.31	691.375		1617.31	696.843		1617.31	705.611		1617.31	711.8		1617.31	727.215		7.8594	-0.48		7.8594	743.371		7.8594	1455.83		7.8594	2155.31		7.8594	2902.44		7.8594	3586.7		1354.34	660.964		1354.34	654.249		1353.98	655.956		1354.82	650.688		7.89716
	1619.68	685.993		1619.68	692.102		1619.68	697.661		1619.68	707.429		1619.68	711.891		1619.68	725.033		7.87617	-0.73729		7.87617	743.603		7.87617	1456.6		7.87617	2154.82		7.87617	2902.51		7.87617	3587.04		1355.23	657.527		1355.23	655.012		1354.88	653.684		1355.72	650.142		7.91413
	1622.06	684.902		1622.06	690.92		1622.06	696.206		1622.06	706.974		1622.06	712.8		1622.06	725.67		7.89294	-0.04174		7.89294	744.631		7.89294	1457.78		7.89294	2154.99		7.89294	2902.16		7.89294	3585.05		1356.13	658.036		1356.13	657.558		1355.77	654.729		1356.61	651.688		7.93111
	1624.43	684.356		1624.43	692.829		1624.43	695.752		1624.43	706.52		1624.43	712.164		1624.43	726.579		7.90972	0.3224		7.90972	745.172		7.90972	1457.08		7.90972	2154.32		7.90972	2901.2		7.90972	3582.77		1357.02	658.927		1357.02	657.303		1356.67	653.729		1357.51	650.415		7.94808
	1626.81	684.356		1626.81	691.011		1626.81	696.206		1626.81	705.792		1626.81	711.528		1626.81	725.67		7.92649	2.09501		7.92649	745.418		7.92649	1456.42		7.92649	2153.51		7.92649	2900.18		7.92649	3581.24		1357.92	660.073		1357.92	654.503		1357.56	653.593		1358.41	651.506		7.96505
	1629.18	684.811		1629.18	691.556		1629.18	696.661		1629.18	707.065		1629.18	712.346		1629.18	727.579		7.94327	3.34056		7.94327	745.086		7.94327	1455.89		7.94327	2152.69		7.94327	2900.04		7.94327	3580.04		1358.81	657.527		1358.81	653.994		1358.46	654.275		1359.3	648.233		7.98203
	1631.56	684.084		1631.56	689.375		1631.56	695.479		1631.56	705.792		1631.56	710.255		1631.56	726.67		7.96004	4.98774		7.96004	745.512		7.96004	1456.36		7.96004	2153.14		7.96004	2901.3		7.96004	3580.83		1359.7	658.036		1359.7	657.049		1359.35	653.865		1360.2	650.869		7.999
	1633.93	685.356		1633.93	691.375		1633.93	697.025		1633.93	705.792		1633.93	712.891		1633.93	725.851		7.97682	6.26808		7.97682	746.454		7.97682	1456.4		7.97682	2154.08		7.97682	2901.7		7.97682	3582.73		1360.6	657.146		1360.6	655.267		1360.24	653.047		1361.09	650.597		8.01597
	1636.3	685.266		1636.3	690.102		1636.3	696.57		1636.3	705.156		1636.3	712.346		1636.3	726.488		7.99359	8.58087		7.99359	746.74		7.99359	1458		7.99359	2154.85		7.99359	2901.91		7.99359	3584.46		1361.49	660.327		1361.49	656.031		1361.14	653.638		1361.99	648.415		8.03294
	1638.67	685.72		1638.67	689.647		1638.67	696.116		1638.67	705.52		1638.67	710.891		1638.67	726.397		8.01037	10.58		8.01037	747.451		8.01037	1458.65		8.01037	2155.68		8.01037	2901.57		8.01037	3585.27		1362.38	658.291		1362.38	654.249		1362.03	652.047		1362.88	649.779		8.04992
	1641.04	683.811		1641.04	689.375		1641.04	695.479		1641.04	705.701		1641.04	710.891		1641.04	726.306		8.02714	13.1761		8.02714	749.802		8.02714	1459.74		8.02714	2156.44		8.02714	2902.17		8.02714	3584.76		1363.27	657.909		1363.27	655.522		1362.93	652.82		1363.78	649.324		8.06689
	1643.41	682.72		1643.41	690.647		1643.41	696.479		1643.41	704.792		1643.41	713.346		1643.41	724.942		8.04391	15.8091		8.04391	752.608		8.04391	1459.92		8.04391	2156.95		8.04391	2902.24		8.04391	3585.62		1364.17	657.4		1364.17	655.012		1363.82	652.547		1364.67	648.96		8.08386
	1645.77	684.356		1645.77	688.375		1645.77	694.206		1645.77	706.701		1645.77	711.346		1645.77	724.033		8.06069	18.2821		8.06069	755.303		8.06069	1461.4		8.06069	2157.95		8.06069	2902.69		8.06069	3584.57		1365.06	656		1365.06	655.522		1364.71	653.002		1365.57	648.233		8.10083
	1648.14	683.084		1648.14	690.647		1648.14	695.752		1648.14	706.429		1648.14	711.437		1648.14	726.306		8.07746	20.4432		8.07746	757.884		8.07746	1463.84		8.07746	2159.35		8.07746	2903.16		8.07746	3585.84		1365.95	658.418		1365.95	652.722		1365.61	653.002		1366.46	648.415		8.11781
	1650.51	683.266		1650.51	690.193		1650.51	695.843		1650.51	706.429		1650.51	711.346		1650.51	725.942		8.09424	21.394		8.09424	762.612		8.09424	1464.9		8.09424	2160.65		8.09424	2904.31		8.09424	3586.88		1366.85	657.909		1366.85	650.685		1366.5	652.411		1367.36	647.869		8.13478
	1652.87	683.447		1652.87	690.011		1652.87	696.388		1652.87	706.611		1652.87	710.255		1652.87	726.397		8.11101	22.7177		8.11101	766.961		8.11101	1469.15		8.11101	2162.42		8.11101	2906.62		8.11101	3589.34		1367.74	656.764		1367.74	654.249		1367.39	653.547		1368.25	649.233		8.15175
	1655.24	684.72		1655.24	689.011		1655.24	694.843		1655.24	705.429		1655.24	710.71		1655.24	725.76		8.12779	24.5526		8.12779	769.935		8.12779	1475.5		8.12779	2163.95		8.12779	2908.81		8.12779	3591.07		1368.63	656.255		1368.63	653.485		1368.29	652.047		1369.14	647.96		8.16873
	1657.6	684.175		1657.6	688.465		1657.6	696.388		1657.6	705.611		1657.6	711.891		1657.6	724.579		8.14456	26.6923		8.14456	773.001		8.14456	1481.46		8.14456	2167.5		8.14456	2911.24		8.14456	3592.01		1369.52	656.509		1369.52	652.467		1369.18	651.638		1370.04	648.324		8.1857
	1659.96	684.266		1659.96	688.92		1659.96	695.752		1659.96	704.338		1659.96	710.71		1659.96	724.397		8.16134	28.2629		8.16134	775.49		8.16134	1484.13		8.16134	2171.17		8.16134	2913.28		8.16134	3594.36		1370.41	656.636		1370.41	652.722		1370.07	651.547		1370.93	649.688		8.20267
	1662.33	683.084		1662.33	688.465		1662.33	695.57		1662.33	704.974		1662.33	712.619		1662.33	723.033		8.17811	30.1754		8.17811	777.179		8.17811	1486.94		8.17811	2175.21		8.17811	2915.56		8.17811	3596.77		1371.31	656.891		1371.31	654.503		1370.97	651.275		1371.83	647.506		8.21964
	1664.69	683.356		1664.69	690.011		1664.69	694.843		1664.69	704.065		1664.69	708.891		1664.69	726.397		8.19488	32.747		8.19488	777.77		8.19488	1491.25		8.19488	2178.82		8.19488	2918.35		8.19488	3598.24		1372.2	656.764		1372.2	653.74		1371.86	651.865		1372.72	647.506		8.23662
	1667.05	682.175		1667.05	689.738		1667.05	694.57		1667.05	705.247		1667.05	708.437		1667.05	724.579		8.21166	37.0743		8.21166	781.172		8.21166	1494.99		8.21166	2181.99		8.21166	2921.94		8.21166	3601.73		1373.09	655.873		1373.09	654.503		1372.75	651.547		1373.61	646.506		8.25359
	1669.41	683.629		1669.41	688.011		1669.41	694.752		1669.41	704.792		1669.41	710.346		1669.41	723.579		8.22843	41.2445		8.22843	784.689		8.22843	1498		8.22843	2183.69		8.22843	2925.04		8.22843	3605.39		1373.98	655.364		1373.98	651.194		1373.65	651.456		1374.51	647.688		8.27056
	1671.76	682.811		1671.76	688.102		1671.76	693.934		1671.76	704.883		1671.76	711.073		1671.76	722.306		8.24521	46.345		8.24521	787.767		8.24521	1499.19		8.24521	2183.91		8.24521	2927.26		8.24521	3609.58		1374.87	653.455		1374.87	652.467		1374.54	651.138		1375.4	647.324		8.28754
	1674.12	682.175		1674.12	687.011		1674.12	693.388		1674.12	704.156		1674.12	711.164		1674.12	722.488		8.26198	52.1484		8.26198	789.567		8.26198	1502.27		8.26198	2184.84		8.26198	2929.9		8.26198	3613.34		1375.76	657.146		1375.76	652.976		1375.43	652.184		1376.3	649.597		8.30451
	1676.48	683.356		1676.48	688.647		1676.48	695.388		1676.48	703.792		1676.48	708.619		1676.48	724.124		8.27876	60.0459		8.27876	792.936		8.27876	1505.7		8.27876	2186.77		8.27876	2932.08		8.27876	3615.19		1376.65	655.618		1376.65	651.958		1376.32	651.411		1377.19	647.415		8.32148
	1678.84	683.629		1678.84	688.92		1678.84	694.479		1678.84	705.974		1678.84	708.619		1678.84	721.579		8.29553	70.9066		8.29553	796.462		8.29553	1508.53		8.29553	2189.57		8.29553	2934.03		8.29553	3617.77		1377.55	656.255		1377.55	651.958		1377.22	652.047		1378.08	647.688		8.33845
	1681.19	682.538		1681.19	688.011		1681.19	694.934		1681.19	703.701		1681.19	708.164		1681.19	722.306		8.3123	83.1408		8.3123	801.009		8.3123	1510.75		8.3123	2191.92		8.3123	2933.98		8.3123	3620.89		1378.44	656.891		1378.44	651.703		1378.11	651.229		1378.97	648.324		8.35543
	1683.54	682.538		1683.54	687.92		1683.54	694.116		1683.54	703.52		1683.54	710.619		1683.54	720.67		8.32908	100.443		8.32908	807.243		8.32908	1514.42		8.32908	2194.2		8.32908	2935.64		8.32908	3624.26		1379.33	655.873		1379.33	652.212		1379	650.729		1379.87	647.051		8.3724
	1685.9	682.447		1685.9	686.92		1685.9	694.388		1685.9	705.429		1685.9	708.073		1685.9	722.397		8.34585	120.614		8.34585	815.191		8.34585	1518.34		8.34585	2196.85		8.34585	2937.81		8.34585	3627.19		1380.22	654.218		1380.22	652.722		1379.89	650.365		1380.76	646.597		8.38937
	1688.25	682.356		1688.25	687.193		1688.25	693.843		1688.25	704.792		1688.25	709.346		1688.25	721.76		8.36263	147.82		8.36263	821.157		8.36263	1525.83		8.36263	2199.22		8.36263	2940.17		8.36263	3628.32		1381.11	654.6		1381.11	651.703		1380.78	651.32		1381.65	647.506		8.40635
	1690.6	681.629		1690.6	687.102		1690.6	693.206		1690.6	704.338		1690.6	709.619		1690.6	720.306		8.3794	184.554		8.3794	829.994		8.3794	1536.14		8.3794	2202.2		8.3794	2943.01		8.3794	3628.2		1382	657.527		1382	653.485		1381.68	651.638		1382.55	648.415		8.42332
	1692.95	681.538		1692.95	687.92		1692.95	693.479		1692.95	702.792		1692.95	708.528		1692.95	719.215		8.39618	232.574		8.39618	840.747		8.39618	1547.39		8.39618	2205.47		8.39618	2944.67		8.39618	3630.74		1382.89	657.146		1382.89	653.994		1382.57	651.547		1383.44	647.688		8.44029
	1695.3	681.447		1695.3	687.465		1695.3	693.752		1695.3	704.065		1695.3	709.982		1695.3	720.306		8.41295	297.641		8.41295	857.322		8.41295	1559.94		8.41295	2210.62		8.41295	2948.03		8.41295	3633.03		1383.78	656.382		1383.78	651.194		1383.46	650.411		1384.33	646.688		8.45726
	1697.65	681.266		1697.65	687.465		1697.65	694.116		1697.65	702.883		1697.65	710.255		1697.65	719.942		8.42973	377.819		8.42973	878.701		8.42973	1571.46		8.42973	2217.71		8.42973	2952.51		8.42973	3639.11		1384.67	655.364		1384.67	649.922		1384.35	651.729		1385.22	648.779		8.47424
	1700	681.811		1700	687.375		1700	692.752		1700	702.065		1700	707.619		1700	723.215		8.4465	469.872		8.4465	904.637		8.4465	1588.45		8.4465	2225.86		8.4465	2958.66		8.4465	3644.28		1385.56	656.382		1385.56	649.412		1385.24	650.729		1386.12	646.96		8.49121
	1702.35	682.084		1702.35	686.738		1702.35	692.934		1702.35	701.701		1702.35	706.982		1702.35	720.942		8.46327	565.564		8.46327	935.594		8.46327	1610.6		8.46327	2236.35		8.46327	2966.08		8.46327	3650.77		1386.45	656.509		1386.45	651.449		1386.13	652.593		1387.01	646.779		8.50818
	1704.7	682.447		1704.7	686.829		1704.7	692.388		1704.7	702.429		1704.7	707.8		1704.7	719.215		8.48005	643.753		8.48005	971.164		8.48005	1639.73		8.48005	2248.95		8.48005	2975.81		8.48005	3658.12		1387.34	655.109		1387.34	654.503		1387.02	652.365		1387.9	647.688		8.52516
	1707.04	683.266		1707.04	686.102		1707.04	691.661		1707.04	701.611		1707.04	708.619		1707.04	718.942		8.49682	689.89		8.49682	1017.04		8.49682	1675.96		8.49682	2265.24		8.49682	2988.53		8.49682	3668.54		1388.23	656.382		1388.23	650.176		1387.91	652.138		1388.79	649.96		8.54213
	1709.39	682.356		1709.39	685.92		1709.39	693.388		1709.39	700.883		1709.39	709.164		1709.39	718.67		8.5136	687.266		8.5136	1071.33		8.5136	1716.44		8.5136	2286.03		8.5136	3004.55		8.5136	3681.53		1389.12	654.218		1389.12	652.467		1388.8	652.275		1389.68	647.051		8.5591
	1711.73	682.266		1711.73	684.556		1711.73	692.57		1711.73	700.974		1711.73	709.437		1711.73	718.67		8.53037	640.091		8.53037	1139.24		8.53037	1767.07		8.53037	2315.32		8.53037	3024.37		8.53037	3699.5		1390.01	657.146		1390.01	652.976		1389.7	652.456		1390.58	647.142		8.57607
	1714.07	681.356		1714.07	686.92		1714.07	692.934		1714.07	699.974		1714.07	709.71		1714.07	719.215		8.54715	563.963		8.54715	1213.39		8.54715	1824.7		8.54715	2352.32		8.54715	3050.33		8.54715	3720.53		1390.9	655.364		1390.9	651.703		1390.59	652.365		1391.47	648.869		8.59305
	1716.42	681.175		1716.42	685.92		1716.42	691.479		1716.42	702.429		1716.42	707.346		1716.42	717.942		8.56392	475.56		8.56392	1286.3		8.56392	1888.4		8.56392	2400.34		8.56392	3084.2		8.56392	3745.5		1391.79	656.382		1391.79	652.722		1391.48	652.32		1392.36	646.597		8.61002
	1718.76	680.811		1718.76	687.102		1718.76	692.57		1718.76	703.065		1718.76	705.891		1718.76	715.124		8.5807	384.988		8.5807	1350.75		8.5807	1956.68		8.5807	2462.37		8.5807	3129.82		8.5807	3780.64		1392.68	656.636		1392.68	652.722		1392.37	652.411		1393.25	648.415		8.62699
	1721.1	680.811		1721.1	687.556		1721.1	690.661		1721.1	701.701		1721.1	706.255		1721.1	716.124		8.59747	309.042		8.59747	1392.23		8.59747	2013.83		8.59747	2534.82		8.59747	3183.39		8.59747	3821.66		1393.57	655.746		1393.57	652.467		1393.26	651.775		1394.14	649.415		8.64396
	1723.44	680.175		1723.44	686.375		1723.44	691.025		1723.44	700.974		1723.44	706.164		1723.44	716.942		8.61424	244.923		8.61424	1403.66		8.61424	2062.18		8.61424	2619.48		8.61424	3250.06		8.61424	3877.92		1394.46	654.855		1394.46	653.485		1394.15	652.365		1395.03	647.415		8.66094
	1725.78	679.902		1725.78	686.465		1725.78	692.297		1725.78	700.883		1725.78	705.982		1725.78	718.306		8.63102	196.627		8.63102	1379.25		8.63102	2081.33		8.63102	2700.73		8.63102	3322.71		8.63102	3941.48		1395.34	657.273		1395.34	654.249		1395.04	652.411		1395.92	647.506		8.67791
	1728.12	680.629		1728.12	685.647		1728.12	690.661		1728.12	700.065		1728.12	708.073		1728.12	718.942		8.64779	158.085		8.64779	1327.15		8.64779	2076.42		8.64779	2773.12		8.64779	3399.36		8.64779	4016.55		1396.23	654.727		1396.23	650.176		1395.93	651.138		1396.81	649.597		8.69488
	1730.45	680.72		1730.45	684.738		1730.45	689.479		1730.45	700.065		1730.45	705.164		1730.45	717.124		8.66457	127.495		8.66457	1253.84		8.66457	2036.95		8.66457	2815.8		8.66457	3464.79		8.66457	4096.52		1397.12	653.582		1397.12	652.976		1396.82	653.365		1397.7	648.233		8.71186
	1732.79	680.993		1732.79	684.647		1732.79	690.57		1732.79	700.611		1732.79	705.437		1732.79	717.306		8.68134	104.554		8.68134	1177.37		8.68134	1979.09		8.68134	2821.26		8.68134	3505.6		8.68134	4169.61		1398.01	656.255		1398.01	655.267		1397.71	653.184		1398.6	647.233		8.72883
	1735.13	680.266		1735.13	684.011		1735.13	690.752		1735.13	699.792		1735.13	703.164		1735.13	713.67		8.69812	85.0797		8.69812	1099.83		8.69812	1905.79		8.69812	2786.3		8.69812	3513.79		8.69812	4226.92		1398.9	656.382		1398.9	650.685		1398.6	652.638		1399.49	646.869		8.7458
	1737.46	681.356		1737.46	684.738		1737.46	690.57		1737.46	701.156		1737.46	704.528		1737.46	713.397		8.71489	71.3971		8.71489	1038.05		8.71489	1835.31		8.71489	2725.16		8.71489	3489.06		8.71489	4254.15		1399.79	653.2		1399.79	650.176		1399.49	652.502		1400.38	648.96		8.76277
	1739.8	681.72		1739.8	685.556		1739.8	691.206		1739.8	699.429		1739.8	706.891		1739.8	714.124		8.73166	59.6561		8.73166	985.136		8.73166	1768.73		8.73166	2645.39		8.73166	3434.31		8.73166	4248.21		1400.68	656.255		1400.68	651.703		1400.38	652.593		1401.27	647.506		8.77975
	1742.13	680.811		1742.13	685.556		1742.13	689.661		1742.13	699.338		1742.13	705.437		1742.13	714.942		8.74844	50.748		8.74844	942.136		8.74844	1710.06		8.74844	2566.98		8.74844	3365.97		8.74844	4209.6		1401.56	655.109		1401.56	653.231		1401.26	652.275		1402.16	649.233		8.79672
	1744.46	680.811		1744.46	685.829		1744.46	689.57		1744.46	700.701		1744.46	706.619		1744.46	713.306		8.76521	41.8403		8.76521	907.142		8.76521	1666.46		8.76521	2495.59		8.76521	3293.43		8.76521	4146.26		1402.45	655.109		1402.45	655.012		1402.15	653.093		1403.05	650.233		8.81369
	1746.79	681.084		1746.79	685.556		1746.79	689.025		1746.79	698.974		1746.79	705.8		1746.79	714.033		8.78199	35.3329		8.78199	877.728		8.78199	1631.21		8.78199	2432.51		8.78199	3224.57		8.78199	4064.64		1403.34	658.418		1403.34	651.449		1403.04	653.275		1403.94	647.051		8.83067
	1749.12	681.447		1749.12	684.556		1749.12	689.843		1749.12	698.792		1749.12	703.346		1749.12	712.033		8.79876	29.9848		8.79876	856.419		8.79876	1605.32		8.79876	2382.57		8.79876	3167.85		8.79876	3988		1404.23	656		1404.23	653.485		1403.93	653.138		1404.83	648.233		8.84764
	1751.45	680.993		1751.45	685.92		1751.45	689.388		1751.45	698.52		1751.45	704.71		1751.45	711.76		8.81554	25.1048		8.81554	838.447		8.81554	1581.4		8.81554	2339.9		8.81554	3117.91		8.81554	3916.48		1405.11	655.364		1405.11	651.958		1404.82	652.365		1405.72	648.779		8.86461
	1753.78	680.447		1753.78	685.011		1753.78	690.752		1753.78	698.52		1753.78	702.71		1753.78	710.306		8.83231	20.8717		8.83231	823.619		8.83231	1560.96		8.83231	2307.65		8.83231	3078.98		8.83231	3858.57		1406	656.891		1406	654.503		1405.71	653.865		1406.61	648.869		8.88158
	1756.11	679.447		1756.11	683.647		1756.11	689.752		1756.11	698.52		1756.11	701.8		1756.11	710.488		8.84909	17.1701		8.84909	811.171		8.84909	1543.08		8.84909	2281.35		8.84909	3046.84		8.84909	3809.25		1406.89	656.636		1406.89	651.449		1406.6	653.047		1407.5	649.869		8.89856
	1758.44	680.175		1758.44	683.829		1758.44	689.297		1758.44	697.611		1758.44	702.255		1758.44	713.76		8.86586	14.0176		8.86586	800.408		8.86586	1528.09		8.86586	2259.76		8.86586	3021.04		8.86586	3767.78		1407.78	658.418		1407.78	651.703		1407.49	653.547		1408.39	648.415		8.91553
	1760.77	679.629		1760.77	683.92		1760.77	688.752		1760.77	696.701		1760.77	702.619		1760.77	714.579		8.88263	11.9983		8.88263	791.645		8.88263	1515.96		8.88263	2243.32		8.88263	3000.94		8.88263	3735.91		1408.66	656.636		1408.66	656.031		1408.37	655.093		1409.27	648.324		8.9325
	1763.09	679.72		1763.09	684.193		1763.09	689.661		1763.09	696.792		1763.09	704.437		1763.09	714.488		8.89941	9.4487		8.89941	784.933		8.89941	1505.22		8.89941	2228.82		8.89941	2984.96		8.89941	3711.02		1409.55	656.636		1409.55	649.412		1409.26	654.411		1410.16	648.324		8.94948
	1765.42	680.266		1765.42	683.375		1765.42	689.843		1765.42	696.52		1765.42	703.8		1765.42	712.76		8.91618	8.00946		8.91618	779.641		8.91618	1496.92		8.91618	2217.96		8.91618	2972.25		8.91618	3690.81		1410.44	655.491		1410.44	655.012		1410.15	653.184		1411.05	647.779		8.96645
	1767.74	680.356		1767.74	683.738		1767.74	689.388		1767.74	696.247		1767.74	702.71		1767.74	710.579		8.93296	6.29289		8.93296	774.713		8.93296	1492.31		8.93296	2207.91		8.93296	2962.34		8.93296	3673.11		1411.33	655.746		1411.33	652.722		1411.04	654.093		1411.94	649.506		8.98342
	1770.06	679.902		1770.06	684.465		1770.06	689.479		1770.06	698.52		1770.06	702.437		1770.06	710.124		8.94973	4.69397		8.94973	768.387		8.94973	1487.04		8.94973	2198.91		8.94973	2952.98		8.94973	3658.16		1412.21	656.127		1412.21	653.485		1411.93	654.32		1412.83	649.688		9.00039
	1772.39	679.447		1772.39	685.193		1772.39	688.116		1772.39	697.338		1772.39	702.164		1772.39	709.488		8.96651	3.56027		8.96651	764.921		8.96651	1481.87		8.96651	2192.04		8.96651	2946.33		8.96651	3646.3		1413.1	657.273		1413.1	652.722		1412.81	654.865		1413.72	649.415		9.01737
	1774.71	680.72		1774.71	684.284		1774.71	688.661		1774.71	696.792		1774.71	700.255		1774.71	708.67		8.98328	2.08129		8.98328	762.264		8.98328	1477.72		8.98328	2186.81		8.98328	2940.07		8.98328	3636.35		1413.99	654.727		1413.99	652.467		1413.7	654.684		1414.61	651.779		9.03434
	1777.03	680.447		1777.03	684.102		1777.03	688.206		1777.03	696.883		1777.03	700.346		1777.03	709.579		9.00005	2.2765		9.00005	761.564		9.00005	1478.06		9.00005	2182.9		9.00005	2934.89		9.00005	3627.76		1414.87	655.873		1414.87	655.776		1414.59	655.411		1415.5	649.506		9.05131
	1779.35	680.811		1779.35	684.556		1779.35	686.843		1779.35	697.247		1779.35	699.982		1779.35	710.306		9.01683	1.77919		9.01683	757.605		9.01683	1476.29		9.01683	2177.57		9.01683	2929.57		9.01683	3620.41		1415.76	657.527		1415.76	650.176		1415.48	655.229		1416.39	649.96		9.06829
	1781.67	680.175		1781.67	683.738		1781.67	687.752		1781.67	696.247		1781.67	700.164		1781.67	708.579		9.0336	1.88575		9.0336	754.716		9.0336	1472.17		9.0336	2173.78		9.0336	2925.96		9.0336	3613.82		1416.64	657.273		1416.64	655.267		1416.37	653.593		1417.27	649.779		9.08526
	1783.99	681.629		1783.99	683.556		1783.99	687.57		1783.99	694.974		1783.99	701.164		1783.99	712.215		9.05038	1.8881		9.05038	753.296		9.05038	1467.67		9.05038	2171.19		9.05038	2922.05		9.05038	3609.57		1417.53	657.273		1417.53	653.74		1417.25	654.365		1418.16	649.142		9.10223
	1786.3	680.356		1786.3	683.829		1786.3	688.116		1786.3	696.065		1786.3	701.437		1786.3	709.579		9.06715	1.80834		9.06715	752.786		9.06715	1465.51		9.06715	2169.67		9.06715	2918.67		9.06715	3607.41		1418.42	658.546		1418.42	652.722		1418.14	653.956		1419.05	650.96		9.1192
	1788.62	680.084		1788.62	683.375		1788.62	687.479		1788.62	695.156		1788.62	701.073		1788.62	709.306		9.08393	2.01851		9.08393	752.876		9.08393	1463.55		9.08393	2167.48		9.08393	2915.51		9.08393	3604.79		1419.3	657.909		1419.3	654.249		1419.03	654.365		1419.94	650.506		9.13618
	1790.94	680.902		1790.94	682.465		1790.94	688.57		1790.94	696.065		1790.94	701.164		1790.94	707.397		9.1007	1.14108		9.1007	750.809		9.1007	1461.02		9.1007	2164.83		9.1007	2913.4		9.1007	3600.86		1420.19	658.164		1420.19	654.249		1419.91	655.002		1420.83	650.688		9.15315
	1793.25	679.902		1793.25	682.738		1793.25	687.934		1793.25	696.429		1793.25	701.346		1793.25	707.397		9.11748	0.3619		9.11748	749.92		9.11748	1458.5		9.11748	2162.93		9.11748	2912.73		9.11748	3597.03		1421.07	655.746		1421.07	655.522		1420.8	655.593		1421.71	649.415		9.17012
	1795.57	679.902		1795.57	684.465		1795.57	686.934		1795.57	694.792		1795.57	699.982		1795.57	706.942		9.13425	0.74856		9.13425	750.3		9.13425	1458.69		9.13425	2161.3		9.13425	2911.49		9.13425	3594.48		1421.96	655.364		1421.96	655.012		1421.69	654.82		1422.6	651.051		9.1871
	1797.88	678.629		1797.88	682.647		1797.88	687.388		1797.88	695.792		1797.88	698.437		1797.88	706.033		9.15102	1.44527		9.15102	749.464		9.15102	1460		9.15102	2160.74		9.15102	2909.73		9.15102	3593.59		1422.84	658.036		1422.84	655.776		1422.57	655.593		1423.49	650.869		9.20407
	1800.19	679.266		1800.19	684.556		1800.19	687.388		1800.19	694.792		1800.19	698.073		1800.19	706.851		9.1678	2.36123		9.1678	747.673		9.1678	1460.06		9.1678	2160.13		9.1678	2907.76		9.1678	3590.9		1423.73	656.509		1423.73	653.74		1423.46	654.775		1424.38	651.506		9.22104
	1802.5	679.084		1802.5	683.829		1802.5	687.479		1802.5	696.611		1802.5	697.346		1802.5	706.033		9.18457	2.78591		9.18457	746.077		9.18457	1459		9.18457	2159		9.18457	2906.39		9.18457	3588.75		1424.62	655.746		1424.62	655.012		1424.35	656.275		1425.26	649.597		9.23801
	1804.82	679.356		1804.82	683.738		1804.82	688.025		1804.82	695.247		1804.82	697.891		1804.82	704.67		9.20135	3.31362		9.20135	745.77		9.20135	1460.14		9.20135	2158.17		9.20135	2905.49		9.20135	3589.31		1425.5	658.418		1425.5	655.522		1425.23	656.093		1426.15	650.96		9.25499
	1807.13	678.72		1807.13	684.284		1807.13	687.116		1807.13	693.429		1807.13	696.8		1807.13	707.579		9.21812	2.64272		9.21812	745.67		9.21812	1460.48		9.21812	2156.99		9.21812	2905.51		9.21812	3589.4		1426.39	657.273		1426.39	655.522		1426.12	656.547		1427.04	650.142		9.27196
	1809.44	679.084		1809.44	683.375		1809.44	686.934		1809.44	695.611		1809.44	697.255		1809.44	706.306		9.2349	2.86697		9.2349	746.351		9.2349	1461.11		9.2349	2156.73		9.2349	2906		9.2349	3589.51		1427.27	658.036		1427.27	656.794		1427.01	656.138		1427.93	652.324		9.28893
	1811.74	678.993		1811.74	683.829		1811.74	685.57		1811.74	695.247		1811.74	697.164		1811.74	703.851		9.25167	3.30068		9.25167	746.961		9.25167	1461.1		9.25167	2156.44		9.25167	2905.18		9.25167	3587.99		1428.16	656.891		1428.16	655.267		1427.89	656.775		1428.81	652.051		9.3059
	1814.05	678.993		1814.05	683.375		1814.05	686.479		1814.05	694.247		1814.05	699.164		1814.05	706.215		9.26845	4.57824		9.26845	747.98		9.26845	1462		9.26845	2156.08		9.26845	2904.58		9.26845	3587.42		1429.04	658.927		1429.04	655.776		1428.78	656.684		1429.7	650.597		9.32288
	1816.36	679.72		1816.36	683.193		1816.36	686.206		1816.36	693.974		1816.36	698.891		1816.36	704.215		9.28522	5.3274		9.28522	747.385		9.28522	1463.53		9.28522	2156.27		9.28522	2903.89		9.28522	3586.68		1429.92	660.455		1429.92	653.485		1429.66	656.32		1430.59	651.051		9.33985
	1818.66	680.356		1818.66	682.465		1818.66	686.297		1818.66	693.338		1818.66	697.437		1818.66	704.306		9.30199	5.79407		9.30199	747.789		9.30199	1465.19		9.30199	2156.5		9.30199	2903.02		9.30199	3587.18		1430.81	657.4		1430.81	653.231		1430.55	656.729		1431.47	650.96		9.35682
	1820.97	680.72		1820.97	682.738		1820.97	687.025		1820.97	692.065		1820.97	698.073		1820.97	703.67		9.31877	6.38181		9.31877	747.935		9.31877	1464.1		9.31877	2156.26		9.31877	2902.24		9.31877	3587.84		1431.69	659.055		1431.69	656.794		1431.43	657.32		1432.36	652.779		9.3738
	1823.27	680.266		1823.27	682.556		1823.27	688.206		1823.27	693.701		1823.27	697.982		1823.27	704.397		9.33554	7.28333		9.33554	748.306		9.33554	1462.71		9.33554	2155.84		9.33554	2901.73		9.33554	3586.51		1432.58	658.927		1432.58	656.031		1432.32	658.047		1433.25	653.142		9.39077
	1825.58	680.175		1825.58	681.829		1825.58	685.57		1825.58	692.156		1825.58	696.437		1825.58	703.76		9.35232	8.33711		9.35232	749.523		9.35232	1461.55		9.35232	2155.15		9.35232	2902.73		9.35232	3586.21		1433.46	657.909		1433.46	657.558		1433.2	657.411		1434.13	650.324		9.40774
	1827.88	679.356		1827.88	682.011		1827.88	687.388		1827.88	692.974		1827.88	696.164		1827.88	704.124		9.36909	8.91983		9.36909	749.679		9.36909	1460.17		9.36909	2154.69		9.36909	2903.58		9.36909	3586.97		1434.35	659.182		1434.35	657.049		1434.09	657.002		1435.02	652.051		9.42471
	1830.18	680.447		1830.18	683.193		1830.18	688.206		1830.18	692.52		1830.18	696.71		1830.18	704.579		9.38587	10.172		9.38587	751.141		9.38587	1460.23		9.38587	2156.1		9.38587	2904.53		9.38587	3587.2		1435.23	657.782		1435.23	655.522		1434.98	659.547		1435.9	653.324		9.44169
	1832.48	679.629		1832.48	683.556		1832.48	687.116		1832.48	693.429		1832.48	697.164		1832.48	703.488		9.40264	11.7715		9.40264	752.736		9.40264	1461.56		9.40264	2157.59		9.40264	2905.23		9.40264	3586.93		1436.11	658.291		1436.11	655.267		1435.86	657.002		1436.79	652.415		9.45866
	1834.78	679.811		1834.78	682.375		1834.78	686.297		1834.78	692.429		1834.78	695.255		1834.78	704.67		9.41941	14.3163		9.41941	753.742		9.41941	1465.09		9.41941	2159.55		9.41941	2905.55		9.41941	3585.12		1437	659.055		1437	657.303		1436.75	657.502		1437.68	653.324		9.47563
	1837.08	679.629		1837.08	682.647		1837.08	685.843		1837.08	691.611		1837.08	695.255		1837.08	702.397		9.43619	16.812		9.43619	753.815		9.43619	1467.68		9.43619	2159.39		9.43619	2906.39		9.43619	3585.09		1437.88	658.418		1437.88	653.74		1437.63	657.547		1438.56	654.142		9.49261
	1839.38	679.538		1839.38	683.375		1839.38	685.57		1839.38	691.611		1839.38	695.073		1839.38	702.76		9.45296	18.5565		9.45296	754.183		9.45296	1465.56		9.45296	2158.69		9.45296	2906.25		9.45296	3586.88		1438.76	661.6		1438.76	656.285		1438.51	659.411		1439.45	653.142		9.50958
	1841.68	679.356		1841.68	683.193		1841.68	685.388		1841.68	692.247		1841.68	694.71		1841.68	704.033		9.46974	21.2023		9.46974	755.408		9.46974	1465.86		9.46974	2158.84		9.46974	2907		9.46974	3587.47		1439.65	661.091		1439.65	655.267		1439.4	658.229		1440.33	653.324		9.52655
	1843.98	679.084		1843.98	682.465		1843.98	684.57		1843.98	691.974		1843.98	694.528		1843.98	703.124		9.48651	23.9094		9.48651	757.133		9.48651	1466.47		9.48651	2159.94		9.48651	2907.02		9.48651	3587.79		1440.53	662.236		1440.53	656.54		1440.28	658.911		1441.22	653.051		9.54352
	1846.27	678.993		1846.27	682.647		1846.27	686.206		1846.27	692.429		1846.27	695.346		1846.27	703.942		9.50329	28.2411		9.50329	759.256		9.50329	1468.36		9.50329	2160.83		9.50329	2907.5		9.50329	3589.29		1441.41	660.327		1441.41	656.54		1441.17	658.684		1442.1	653.688		9.5605
	1848.57	678.266		1848.57	682.738		1848.57	685.752		1848.57	692.52		1848.57	695.073		1848.57	700.215		9.52006	32.5752		9.52006	761.859		9.52006	1471.96		9.52006	2162.73		9.52006	2908.28		9.52006	3590.25		1442.3	660.2		1442.3	657.558		1442.05	659.502		1442.99	655.415		9.57747
	1850.86	678.538		1850.86	683.011		1850.86	685.479		1850.86	691.52		1850.86	695.982		1850.86	702.851		9.53684	35.8078		9.53684	764.913		9.53684	1471.79		9.53684	2164.33		9.53684	2909.68		9.53684	3590.25		1443.18	658.927		1443.18	657.812		1442.94	658.638		1443.87	654.142		9.59444
	1853.16	678.811		1853.16	682.556		1853.16	685.206		1853.16	691.701		1853.16	697.255		1853.16	701.488		9.55361	38.9451		9.55361	768.73		9.55361	1474.67		9.55361	2165.37		9.55361	2911.57		9.55361	3589.53		1444.06	659.055		1444.06	660.358		1443.82	659.002		1444.76	655.506		9.61142
	1855.45	678.538		1855.45	681.92		1855.45	685.479		1855.45	689.611		1855.45	695.8		1855.45	701.76		9.57038	44.0311		9.57038	772.349		9.57038	1474.27		9.57038	2167.32		9.57038	2913.58		9.57038	3589.97		1444.95	657.655		1444.95	654.758		1444.7	660.002		1445.64	652.142		9.62839
	1857.74	678.538		1857.74	681.375		1857.74	685.661		1857.74	690.883		1857.74	695.437		1857.74	701.033		9.58716	49.2278		9.58716	775.261		9.58716	1477.7		9.58716	2169.41		9.58716	2916.11		9.58716	3591.99		1445.83	661.473		1445.83	659.34		1445.59	659.456		1446.53	655.142		9.64536
	1860.04	678.447		1860.04	681.92		1860.04	684.661		1860.04	691.065		1860.04	696.073		1860.04	701.67		9.60393	55.8282		9.60393	777.614		9.60393	1481.02		9.60393	2171.66		9.60393	2918.15		9.60393	3594.61		1446.71	659.946		1446.71	659.594		1446.47	659.956		1447.41	654.506		9.66233
	1862.33	678.72		1862.33	681.92		1862.33	685.388		1862.33	689.792		1862.33	693.8		1862.33	700.488		9.62071	61.6474		9.62071	782.182		9.62071	1486.76		9.62071	2173.14		9.62071	2919.97		9.62071	3597.24		1447.59	658.546		1447.59	656.54		1447.36	660.456		1448.3	656.051		9.67931
	1864.62	679.356		1864.62	680.829		1864.62	686.388		1864.62	691.247		1864.62	695.619		1864.62	701.215		9.63748	67.535		9.63748	785.492		9.63748	1493		9.63748	2175.85		9.63748	2922.09		9.63748	3600.57		1448.48	660.582		1448.48	658.831		1448.24	659.865		1449.18	655.415		9.69628
	1866.9	679.084		1866.9	681.193		1866.9	685.388		1866.9	690.247		1866.9	693.71		1866.9	702.215		9.65426	72.7734		9.65426	790.008		9.65426	1493.9		9.65426	2178.52		9.65426	2924.08		9.65426	3603.27		1449.36	659.691		1449.36	656.54		1449.12	660.411		1450.07	653.869		9.71325
	1869.19	679.266		1869.19	681.92		1869.19	684.57		1869.19	690.792		1869.19	694.255		1869.19	700.851		9.67103	77.8934		9.67103	792.496		9.67103	1495.26		9.67103	2181.25		9.67103	2926.08		9.67103	3607.27		1450.24	661.727		1450.24	658.576		1450.01	660.865		1450.95	655.142		9.73023
	1871.48	679.447		1871.48	680.829		1871.48	685.388		1871.48	690.065		1871.48	692.255		1871.48	700.215		9.68781	83.7323		9.68781	798.041		9.68781	1497.8		9.68781	2184.56		9.68781	2927.96		9.68781	3608.3		1451.12	661.6		1451.12	663.158		1450.89	661.456		1451.84	653.869		9.7472
	1873.77	679.356		1873.77	681.284		1873.77	685.388		1873.77	689.883		1873.77	692.346		1873.77	700.488		9.70458	86.7772		9.70458	802.595		9.70458	1503.89		9.70458	2188.44		9.70458	2931.46		9.70458	3609.06		1452	662.236		1452	658.831		1451.77	660.82		1452.72	656.869		9.76417
	1876.05	678.72		1876.05	682.92		1876.05	684.843		1876.05	692.52		1876.05	692.528		1876.05	700.942		9.72135	89.1363		9.72135	805.85		9.72135	1509.49		9.72135	2193.04		9.72135	2934.87		9.72135	3610.34		1452.89	661.855		1452.89	661.631		1452.65	661.865		1453.6	656.415		9.78114
	1878.34	678.902		1878.34	681.92		1878.34	685.479		1878.34	692.338		1878.34	691.8		1878.34	700.215		9.73813	90.5356		9.73813	809.095		9.73813	1513.9		9.73813	2196.8		9.73813	2938.13		9.73813	3613.51		1453.77	660.709		1453.77	658.831		1453.54	660.593		1454.49	656.233		9.79812
	1880.62	678.538		1880.62	681.375		1880.62	685.025		1880.62	691.883		1880.62	692.8		1880.62	699.76		9.7549	90.9846		9.7549	811.436		9.7549	1515.19		9.7549	2200.29		9.7549	2941.02		9.7549	3616.57		1454.65	663.509		1454.65	658.322		1454.42	662.365		1455.37	654.324		9.81509
	1882.91	678.811		1882.91	681.375		1882.91	683.661		1882.91	689.974		1882.91	693.255		1882.91	699.76		9.77168	90.2169		9.77168	815.607		9.77168	1519.21		9.77168	2203.49		9.77168	2943.9		9.77168	3621.5		1455.53	662.236		1455.53	659.085		1455.3	661.956		1456.25	657.869		9.83206
	1885.19	678.356		1885.19	682.284		1885.19	684.025		1885.19	690.429		1885.19	693.164		1885.19	699.124		9.78845	87.2141		9.78845	818.834		9.78845	1521.95		9.78845	2207.08		9.78845	2947.38		9.78845	3626.24		1456.41	663.382		1456.41	658.067		1456.19	660.775		1457.14	656.688		9.84903
	1887.47	678.72		1887.47	682.465		1887.47	683.934		1887.47	690.065		1887.47	693.073		1887.47	699.488		9.80523	82.3732		9.80523	822.218		9.80523	1525.97		9.80523	2211.51		9.80523	2952.47		9.80523	3630.72		1457.29	661.727		1457.29	661.376		1457.07	661.593		1458.02	656.506		9.86601
	1889.75	677.266		1889.75	682.556		1889.75	684.388		1889.75	689.611		1889.75	693.164		1889.75	699.215		9.822	75.6691		9.822	825.758		9.822	1527.47		9.822	2215.53		9.822	2956.16		9.822	3634.1		1458.17	663.127		1458.17	658.322		1457.95	662.502		1458.91	654.96		9.88298
	1892.03	678.266		1892.03	682.375		1892.03	684.206		1892.03	690.156		1892.03	693.8		1892.03	698.488		9.83877	68.9737		9.83877	826.537		9.83877	1530.81		9.83877	2218.65		9.83877	2960.67		9.83877	3637.37		1459.06	661.218		1459.06	663.922		1458.83	662.502		1459.79	657.324		9.89995
	1894.31	677.356		1894.31	681.284		1894.31	683.843		1894.31	689.883		1894.31	694.71		1894.31	698.397		9.85555	61.4302		9.85555	827.56		9.85555	1534.87		9.85555	2221.83		9.85555	2964.6		9.85555	3642.28		1459.94	662.873		1459.94	661.631		1459.71	661.865		1460.67	656.688		9.91693
	1896.59	677.811		1896.59	682.465		1896.59	684.297		1896.59	688.974		1896.59	695.073		1896.59	697.942		9.87232	54.3287		9.87232	826.476		9.87232	1535.13		9.87232	2224.57		9.87232	2968.15		9.87232	3647.6		1460.82	663		1460.82	661.631		1460.6	662.456		1461.55	656.779		9.9339
	1898.87	677.811		1898.87	682.284		1898.87	684.752		1898.87	689.611		1898.87	694.891		1898.87	698.942		9.8891	48.4805		9.8891	824.017		9.8891	1533.31		9.8891	2227.72		9.8891	2970.77		9.8891	3651.86		1461.7	663.636		1461.7	661.376		1461.48	664.138		1462.44	657.233		9.95087
	1901.14	677.811		1901.14	681.375		1901.14	684.025		1901.14	689.156		1901.14	693.437		1901.14	697.306		9.90587	42.9341		9.90587	820.458		9.90587	1530.92		9.90587	2229.43		9.90587	2972.23		9.90587	3656.05		1462.58	660.709		1462.58	661.631		1462.36	662.729		1463.32	656.869		9.96784
	1903.42	677.72		1903.42	681.556		1903.42	684.116		1903.42	688.429		1903.42	692.528		1903.42	698.033		9.92265	37.28		9.92265	816		9.92265	1530.37		9.92265	2230.17		9.92265	2973.89		9.92265	3659.23		1463.46	663		1463.46	660.103		1463.24	665.82		1464.2	657.506		9.98482
	1905.69	678.538		1905.69	681.284		1905.69	684.843		1905.69	688.429		1905.69	693.164		1905.69	699.033		9.93942	32.0219		9.93942	812.309		9.93942	1529.68		9.93942	2230.82		9.93942	2975.52		9.93942	3661.8		1464.34	663.127		1464.34	663.412		1464.12	663.456		1465.08	657.779		10.0018
	1907.97	678.084		1907.97	681.102		1907.97	684.57		1907.97	689.247		1907.97	692.8		1907.97	699.488		9.9562	27.8725		9.9562	807.922		9.9562	1526.12		9.9562	2229.39		9.9562	2975.77		9.9562	3663.62		1465.22	665.164		1465.22	663.158		1465	663.638		1465.97	659.597		10.0188
	1910.24	677.811		1910.24	680.738		1910.24	684.479		1910.24	687.611		1910.24	691.255		1910.24	698.851		9.97297	23.8649		9.97297	803.2		9.97297	1521.42		9.97297	2227.9		9.97297	2974.73		9.97297	3664.87		1466.1	663.509		1466.1	662.14		1465.89	665.729		1466.85	656.415		10.0357
	1912.52	678.72		1912.52	681.738		1912.52	685.116		1912.52	688.338		1912.52	691.982		1912.52	699.306		9.98974	21.4754		9.98974	798.556		9.98974	1516.72		9.98974	2225.83		9.98974	2972.64		9.98974	3665.2		1466.98	665.546		1466.98	660.358		1466.77	664.047		1467.73	658.506		10.0527
	1914.79	678.266		1914.79	681.556		1914.79	684.57		1914.79	688.429		1914.79	691.71		1914.79	698.579		10.0065	17.8865		10.0065	795.403		10.0065	1511.24		10.0065	2223.87		10.0065	2970.78		10.0065	3665.89		1467.86	662.364		1467.86	662.14		1467.65	664.865		1468.61	657.142		10.0697
	1917.06	678.538		1917.06	680.193		1917.06	684.843		1917.06	688.065		1917.06	691.164		1917.06	698.306		10.0233	15.0983		10.0233	790.811		10.0233	1505.45		10.0233	2220.69		10.0233	2968.77		10.0233	3663.52		1468.74	666.564		1468.74	662.649		1468.53	665.638		1469.5	657.779		10.0867
	1919.33	677.902		1919.33	680.829		1919.33	684.479		1919.33	688.792		1919.33	691.437		1919.33	699.76		10.0401	12.8865		10.0401	786.136		10.0401	1500.57		10.0401	2216.27		10.0401	2966.25		10.0401	3660.24		1469.62	664.4		1469.62	663.158		1469.41	664.956		1470.38	659.324		10.1036
	1921.6	677.084		1921.6	681.011		1921.6	683.479		1921.6	690.247		1921.6	691.255		1921.6	698.215		10.0568	11.8777		10.0568	781.391		10.0568	1498.62		10.0568	2211.35		10.0568	2962.54		10.0568	3655.44		1470.5	664.018		1470.5	662.14		1470.29	665.138		1471.26	659.142		10.1206
	1923.87	678.266		1923.87	681.375		1923.87	683.843		1923.87	688.792		1923.87	691.346		1923.87	696.851		10.0736	10.5663		10.0736	776.721		10.0736	1495.24		10.0736	2205.52		10.0736	2958.4		10.0736	3652.43		1471.38	664.4		1471.38	664.685		1471.17	665.956		1472.14	660.233		10.1376
	1926.14	677.538		1926.14	681.193		1926.14	684.025		1926.14	688.247		1926.14	690.982		1926.14	697.124		10.0904	7.92938		10.0904	771.541		10.0904	1488.51		10.0904	2200.12		10.0904	2952.41		10.0904	3649.12		1472.26	663.382		1472.26	661.631		1472.05	667.047		1473.02	659.415		10.1546
	1928.4	678.084		1928.4	680.465		1928.4	683.297		1928.4	688.883		1928.4	691.8		1928.4	696.579		10.1072	6.04703		10.1072	767.803		10.1072	1484.45		10.1072	2194.58		10.1072	2946.67		10.1072	3645.4		1473.14	666.946		1473.14	661.885		1472.93	666.82		1473.9	659.051		10.1715
	1930.67	677.447		1930.67	681.284		1930.67	683.661		1930.67	689.065		1930.67	692.346		1930.67	696.397		10.1239	4.99302		10.1239	765.036		10.1239	1480.25		10.1239	2190.19		10.1239	2942.75		10.1239	3639.44		1474.02	666.182		1474.02	663.412		1473.81	666.638		1474.79	659.051		10.1885
	1932.94	678.266		1932.94	680.375		1932.94	683.025		1932.94	689.065		1932.94	691.982		1932.94	696.033		10.1407	5.49574		10.1407	763.459		10.1407	1479.22		10.1407	2186.42		10.1407	2939.21		10.1407	3632.65		1474.89	666.564		1474.89	662.903		1474.69	667.184		1475.67	660.688		10.2055
	1935.2	678.084		1935.2	681.556		1935.2	682.752		1935.2	688.974		1935.2	691.71		1935.2	696.76		10.1575	6.22718		10.1575	761.96		10.1575	1478.21		10.1575	2184.17		10.1575	2935.72		10.1575	3628.23		1475.77	666.564		1475.77	664.176		1475.57	668.32		1476.55	661.142		10.2224
	1937.47	678.084		1937.47	681.647		1937.47	683.57		1937.47	687.52		1937.47	692.528		1937.47	695.215		10.1743	6.61559		10.1743	760.069		10.1743	1476.62		10.1743	2181.67		10.1743	2932.33		10.1743	3624.64		1476.65	666.818		1476.65	665.958		1476.45	666.911		1477.43	661.688		10.2394
	1939.73	677.447		1939.73	681.011		1939.73	683.388		1939.73	688.065		1939.73	692.255		1939.73	696.215		10.191	6.93659		10.191	758.717		10.191	1476.36		10.191	2179.17		10.191	2928.78		10.191	3621.45		1477.53	667.327		1477.53	668.249		1477.33	669.411		1478.31	659.869		10.2564
	1941.99	678.084		1941.99	681.465		1941.99	683.206		1941.99	687.701		1941.99	691.891		1941.99	697.579		10.2078	7.83855		10.2078	757.764		10.2078	1476.15		10.2078	2177.31		10.2078	2925.93		10.2078	3617.77		1478.41	667.073		1478.41	665.449		1478.21	668.593		1479.19	660.869		10.2734
	1944.25	677.811		1944.25	680.556		1944.25	682.934		1944.25	688.429		1944.25	692.8		1944.25	696.67		10.2246	8.35007		10.2246	759.195		10.2246	1476.02		10.2246	2176.67		10.2246	2924.03		10.2246	3615.45		1479.29	667.455		1479.29	665.449		1479.09	669.002		1480.07	662.869		10.2903
	1946.51	678.902		1946.51	679.92		1946.51	683.297		1946.51	686.974		1946.51	691.982		1946.51	695.76		10.2414	9.63071		10.2414	759.744		10.2414	1475.75		10.2414	2176.05		10.2414	2922.42		10.2414	3614.02		1480.17	666.309		1480.17	663.158		1479.97	668.775		1480.95	659.233		10.3073
	1948.77	678.72		1948.77	679.92		1948.77	683.116		1948.77	688.247		1948.77	693.528		1948.77	696.579		10.2581	9.24834		10.2581	760.023		10.2581	1475.54		10.2581	2174.43		10.2581	2919.86		10.2581	3612.12		1481.05	667.582		1481.05	667.231		1480.85	669.956		1481.83	661.415		10.3243
	1951.03	677.811		1951.03	679.375		1951.03	683.116		1951.03	687.429		1951.03	694.073		1951.03	697.397		10.2749	9.02264		10.2749	758.438		10.2749	1477.02		10.2749	2171.23		10.2749	2917.85		10.2749	3609.26		1481.92	670		1481.92	665.703		1481.73	670.275		1482.71	659.142		10.3413
	1953.29	678.447		1953.29	680.738		1953.29	682.752		1953.29	687.429		1953.29	692.073		1953.29	695.76		10.2917	8.80253		10.2917	756.499		10.2917	1478.45		10.2917	2169.11		10.2917	2916.21		10.2917	3606.03		1482.8	666.564		1482.8	665.703		1482.61	670.002		1483.59	661.506		10.3582
	1955.55	678.356		1955.55	680.193		1955.55	684.206		1955.55	687.338		1955.55	691.346		1955.55	697.942		10.3085	8.39869		10.3085	754.335		10.3085	1477.42		10.3085	2167.33		10.3085	2914.73		10.3085	3602.98		1483.68	667.836		1483.68	665.449		1483.49	669.229		1484.47	660.415		10.3752
	1957.81	677.629		1957.81	680.193		1957.81	683.752		1957.81	687.065		1957.81	693.437		1957.81	697.942		10.3252	7.88201		10.3252	752.437		10.3252	1477.18		10.3252	2164.7		10.3252	2912.32		10.3252	3600.91		1484.56	666.182		1484.56	666.722		1484.37	671.093		1485.35	662.233		10.3922
	1960.06	677.266		1960.06	680.011		1960.06	683.116		1960.06	687.338		1960.06	691.528		1960.06	697.306		10.342	7.15306		10.342	751.678		10.342	1474.1		10.342	2162.91		10.342	2910.54		10.342	3599.99		1485.43	666.818		1485.43	664.685		1485.25	670.365		1486.23	664.688		10.4091
	1962.32	677.356		1962.32	679.829		1962.32	683.297		1962.32	687.974		1962.32	690.71		1962.32	695.942		10.3588	6.36592		10.3588	752.685		10.3588	1471.02		10.3588	2161.92		10.3588	2909.01		10.3588	3597.12		1486.31	667.582		1486.31	668.758		1486.13	670.411		1487.11	664.506		10.4261
	1964.57	678.811		1964.57	679.829		1964.57	682.388		1964.57	686.611		1964.57	692.073		1964.57	696.397		10.3756	5.091		10.3756	751.824		10.3756	1467.49		10.3756	2161.65		10.3756	2908.47		10.3756	3594.71		1487.19	667.455		1487.19	667.74		1487	670.956		1487.99	663.324		10.4431
	1966.83	677.993		1966.83	680.193		1966.83	682.661		1966.83	687.247		1966.83	690.073		1966.83	695.76		10.3923	4.24595		10.3923	750.34		10.3923	1466.15		10.3923	2161.25		10.3923	2907.81		10.3923	3593.13		1488.07	667.455		1488.07	664.176		1487.88	670.775		1488.87	663.779		10.4601
	1969.08	678.266		1969.08	680.556		1969.08	682.388		1969.08	687.429		1969.08	688.619		1969.08	695.124		10.4091	4.90531		10.4091	750.384		10.4091	1466.95		10.4091	2160.68		10.4091	2906.93		10.4091	3593.29		1488.94	668.473		1488.94	667.994		1488.76	671.275		1489.75	665.96		10.477
	1971.33	678.175		1971.33	679.556		1971.33	682.297		1971.33	687.883		1971.33	691.073		1971.33	695.942		10.4259	4.71462		10.4259	750.947		10.4259	1467.54		10.4259	2160.1		10.4259	2906.15		10.4259	3592.69		1489.82	669.236		1489.82	669.012		1489.64	672.456		1490.63	665.233		10.494
	1973.58	677.72		1973.58	679.647		1973.58	682.843		1973.58	686.429		1973.58	689.528		1973.58	695.851		10.4427	2.97995		10.4427	750.184		10.4427	1465.21		10.4427	2158.21		10.4427	2905.25		10.4427	3591.33		1490.7	667.582		1490.7	669.012		1490.52	673.229		1491.51	662.597		10.511
	1975.84	678.356		1975.84	679.647		1975.84	681.934		1975.84	686.611		1975.84	689.71		1975.84	694.76		10.4594	1.49244		10.4594	749.481		10.4594	1464.34		10.4594	2156.87		10.4594	2904.43		10.4594	3590.94		1491.58	669.618		1491.58	666.467		1491.4	672.411		1492.39	663.142		10.528
	1978.09	677.175		1978.09	680.556		1978.09	681.934		1978.09	686.52		1978.09	689.346		1978.09	694.215		10.4762	0.98896		10.4762	748.294		10.4762	1463.63		10.4762	2156.25		10.4762	2904.42		10.4762	3588.89		1492.45	668.473		1492.45	665.703		1492.27	674.411		1493.27	664.688		10.5449
	1980.33	677.993		1980.33	680.193		1980.33	681.752		1980.33	686.429		1980.33	689.71		1980.33	694.579		10.493	1.98855		10.493	746.828		10.493	1465.11		10.493	2156.58		10.493	2903.86		10.493	3589.48		1493.33	670.764		1493.33	667.74		1493.15	673.638		1494.15	665.051		10.5619
	1982.58	677.629		1982.58	680.556		1982.58	682.934		1982.58	686.611		1982.58	691.437		1982.58	695.579		10.5098	2.75912		10.5098	746.318		10.5098	1466.14		10.5098	2157.62		10.5098	2904.4		10.5098	3588.69		1494.21	667.073		1494.21	667.231		1494.03	672.775		1495.03	666.415		10.5789
	1984.83	678.084		1984.83	679.465		1984.83	683.388		1984.83	685.52		1984.83	691.619		1984.83	694.488		10.5265	2.19128		10.5265	746.063		10.5265	1467.61		10.5265	2158.11		10.5265	2904.14		10.5265	3589.73		1495.08	669.109		1495.08	670.031		1494.91	673.729		1495.9	665.869		10.5958
	1987.08	678.084		1987.08	679.556		1987.08	682.57		1987.08	685.611		1987.08	690.619		1987.08	694.215		10.5433	1.57418		10.5433	746.366		10.5433	1467.87		10.5433	2158.09		10.5433	2904.32		10.5433	3588.56		1495.96	669.746		1495.96	669.522		1495.78	673.456		1496.78	666.688		10.6128
	1989.32	676.811		1989.32	680.193		1989.32	681.57		1989.32	686.065		1989.32	690.619		1989.32	694.488		10.5601	0.15161		10.5601	745.797		10.5601	1466.06		10.5601	2157.07		10.5601	2903.7		10.5601	3587.71		1496.84	667.836		1496.84	672.322		1496.66	673.865		1497.66	664.051		10.6298
	1991.57	677.72		1991.57	679.102		1991.57	682.843		1991.57	685.701		1991.57	691.437		1991.57	694.306		10.5769	0.02054		10.5769	746.592		10.5769	1467.16		10.5769	2156.72		10.5769	2902.97		10.5769	3588.28		1497.71	669.364		1497.71	669.012		1497.54	674.502		1498.54	665.96		10.6468
	1993.81	678.629		1993.81	679.556		1993.81	681.025		1993.81	685.247		1993.81	692.255		1993.81	693.942		10.5936	0.23024		10.5936	747.687		10.5936	1467.13		10.5936	2156.85		10.5936	2902.61		10.5936	3588.09		1498.59	670.891		1498.59	668.249		1498.42	673.593		1499.42	667.051		10.6637
	1996.06	678.175		1996.06	678.92		1996.06	682.206		1996.06	685.247		1996.06	690.437		1996.06	694.579		10.6104	0.88929		10.6104	748.533		10.6104	1469.03		10.6104	2157.57		10.6104	2903.35		10.6104	3589.59		1499.46	669.746		1499.46	667.994		1499.29	675.411		1500.3	665.142		10.6807
	1998.3	677.72		1998.3	679.829		1998.3	681.297		1998.3	685.52		1998.3	690.073		1998.3	694.397		10.6272	1.33104		10.6272	748.03		10.6272	1467.97		10.6272	2157.5		10.6272	2903.75		10.6272	3591.44		1500.34	670.255		1500.34	668.758		1500.17	676.093		1501.17	665.688		10.6977
	2000.54	677.72		2000.54	680.193		2000.54	682.752		2000.54	685.247		2000.54	688.982		2000.54	692.76		10.644	1.47916		10.644	747.392		10.644	1468.25		10.644	2157.89		10.644	2903.83		10.644	3592.75		1501.22	671.146		1501.22	670.794		1501.05	673.729		1502.05	665.506		10.7147
	2002.78	678.356		2002.78	679.102		2002.78	682.57		2002.78	684.701		2002.78	688.891		2002.78	694.124		10.6607	2.5307		10.6607	748.561		10.6607	1467.7		10.6607	2157.9		10.6607	2903.85		10.6607	3592.88		1502.09	671.4		1502.09	670.54		1501.93	675.456		1502.93	665.869		10.7316
	2005.02	678.175		2005.02	678.829		2005.02	681.843		2005.02	684.701		2005.02	689.528		2005.02	695.124		10.6775	2.20801		10.6775	747.526		10.6775	1465.69		10.6775	2158.29		10.6775	2903.68		10.6775	3591.5		1502.97	671.4		1502.97	668.758		1502.8	674.002		1503.81	666.506		10.7486
	2007.26	677.811		2007.26	680.829		2007.26	682.934		2007.26	684.156		2007.26	688.164		2007.26	693.579		10.6943	2.00686		10.6943	747.759		10.6943	1464.71		10.6943	2158.04		10.6943	2903.9		10.6943	3590.6		1503.84	669.873		1503.84	671.049		1503.68	673.911		1504.69	667.051		10.7656
	2009.5	677.447		2009.5	680.102		2009.5	682.116		2009.5	685.52		2009.5	688.528		2009.5	694.579		10.711	0.47061		10.711	747.797		10.711	1462.83		10.711	2157.78		10.711	2904.07		10.711	3590.69		1504.72	671.655		1504.72	674.103		1504.56	677.093		1505.56	664.597		10.7825
	2011.74	677.72		2011.74	680.102		2011.74	682.206		2011.74	684.792		2011.74	688.255		2011.74	695.215		10.7278	-0.15728		10.7278	746.17		10.7278	1462.47		10.7278	2157.5		10.7278	2904.01		10.7278	3590.44		1505.59	673.055		1505.59	672.576		1505.43	675.911		1506.44	666.597		10.7995
	2013.98	678.538		2013.98	679.829		2013.98	683.025		2013.98	684.52		2013.98	687.71		2013.98	695.033		10.7446	0.30451		10.7446	745.404		10.7446	1462.61		10.7446	2157.25		10.7446	2904.18		10.7446	3590.59		1506.47	670.764		1506.47	671.049		1506.31	675.775		1507.32	665.96		10.8165
	2016.21	678.175		2016.21	680.284		2016.21	681.57		2016.21	684.701		2016.21	688.164		2016.21	693.851		10.7614	1.19274		10.7614	744.722		10.7614	1461.32		10.7614	2156.25		10.7614	2903.58		10.7614	3588.59		1507.34	673.691		1507.34	673.34		1507.18	675.684		1508.2	666.233		10.8335
	2018.45	677.175		2018.45	679.647		2018.45	681.297		2018.45	683.701		2018.45	687.982		2018.45	694.306		10.7781	1.81542		10.7781	745.798		10.7781	1461.04		10.7781	2155.94		10.7781	2903.89		10.7781	3586.45		1508.22	670.636		1508.22	671.558		1508.06	675.911		1509.07	665.233		10.8504
	2020.68	678.266		2020.68	679.556		2020.68	681.843		2020.68	685.792		2020.68	687.528		2020.68	692.124		10.7949	1.7388		10.7949	746.323		10.7949	1461.05		10.7949	2155.45		10.7949	2904.4		10.7949	3585.34		1509.09	670		1509.09	670.794		1508.94	678.047		1509.95	667.051		10.8674
	2022.92	678.447		2022.92	680.102		2022.92	680.934		2022.92	684.883		2022.92	687.891		2022.92	692.306		10.8117	1.79034		10.8117	747.751		10.8117	1461.47		10.8117	2155.37		10.8117	2905.29		10.8117	3585.88		1509.97	674.073		1509.97	672.322		1509.81	676.547		1510.83	667.142		10.8844
	2025.15	677.993		2025.15	680.375		2025.15	681.388		2025.15	684.792		2025.15	688.619		2025.15	692.306		10.8285	1.46639		10.8285	748.556		10.8285	1462.35		10.8285	2154.69		10.8285	2904.73		10.8285	3585.93		1510.84	672.164		1510.84	671.812		1510.69	677.002		1511.7	668.415		10.9014
	2027.38	678.538		2027.38	679.738		2027.38	682.661		2027.38	684.792		2027.38	687.982		2027.38	691.851		10.8452	1.57543		10.8452	748.729		10.8452	1463.76		10.8452	2154.92		10.8452	2903.92		10.8452	3585.87		1511.72	672.927		1511.72	669.776		1511.56	675.82		1512.58	667.506		10.9183
	2029.62	678.356		2029.62	679.738		2029.62	681.843		2029.62	684.247		2029.62	689.619		2029.62	691.397		10.862	1.70875		10.862	747.831		10.862	1463.41		10.862	2155.46		10.862	2902.83		10.862	3584.96		1512.59	674.327		1512.59	668.758		1512.44	675.047		1513.46	668.051		10.9353
	2031.85	678.538		2031.85	680.102		2031.85	681.843		2031.85	684.792		2031.85	688.346		2031.85	692.215		10.8788	2.14503		10.8788	747.893		10.8788	1461.55		10.8788	2155.57		10.8788	2903.18		10.8788	3585.33		1513.47	673.564		1513.47	671.303		1513.31	677.411		1514.33	665.96		10.9523
	2034.08	677.72		2034.08	679.647		2034.08	682.206		2034.08	684.701		2034.08	687.982		2034.08	692.488		10.8956	1.91951		10.8956	747.129		10.8956	1457.64		10.8956	2155.65		10.8956	2903.64		10.8956	3585.51		1514.34	671.527		1514.34	673.085		1514.19	678.32		1515.21	666.142		10.9692
	2036.31	678.993		2036.31	679.829		2036.31	681.843		2036.31	685.338		2036.31	688.528		2036.31	691.67		10.9123	1.74282		10.9123	746.903		10.9123	1455.81		10.9123	2154.84		10.9123	2903.74		10.9123	3586.49		1515.21	675.473		1515.21	672.322		1515.07	676.502		1516.09	665.869		10.9862
	2038.54	678.084		2038.54	679.284		2038.54	682.297		2038.54	685.156		2038.54	688.437		2038.54	692.76		10.9291	1.46897		10.9291	746.955		10.9291	1458.56		10.9291	2155.56		10.9291	2903.41		10.9291	3585.72		1516.09	671.909		1516.09	673.34		1515.94	676.775		1516.96	668.142		11.0032
	2040.76	677.902		2040.76	680.375		2040.76	681.661		2040.76	684.792		2040.76	688.073		2040.76	692.306		10.9459	1.93894		10.9459	746.978		10.9459	1462.06		10.9459	2156		10.9459	2902.72		10.9459	3585.05		1516.96	671.018		1516.96	672.831		1516.82	676.911		1517.84	666.688		11.0202
	2042.99	677.629		2042.99	679.647		2042.99	681.297		2042.99	685.338		2042.99	688.164		2042.99	692.579		10.9627	1.84751		10.9627	746.214		10.9627	1461.77		10.9627	2156.55		10.9627	2903.03		10.9627	3584.39		1517.84	672.8		1517.84	670.794		1517.69	675.775		1518.71	665.051		11.0371
	2045.22	677.902		2045.22	679.647		2045.22	682.025		2045.22	684.792		2045.22	687.982		2045.22	691.942		10.9794	1.98168		10.9794	746.357		10.9794	1459.59		10.9794	2156.09		10.9794	2903.53		10.9794	3584.42		1518.71	674.327		1518.71	672.067		1518.56	678.684		1519.59	666.051		11.0541
	2047.44	678.993		2047.44	679.647		2047.44	682.388		2047.44	684.52		2047.44	689.255		2047.44	690.851		10.9962	2.21403		10.9962	747.596		10.9962	1456.67		10.9962	2156.02		10.9962	2903.8		10.9962	3584.7		1519.58	674.073		1519.58	670.54		1519.44	676.638		1520.46	666.142		11.0711
	2049.67	678.175		2049.67	679.829		2049.67	681.661		2049.67	685.247		2049.67	688.437		2049.67	691.397		11.013	1.73635		11.013	748.69		11.013	1455.46		11.013	2156.69		11.013	2902.9		11.013	3586.28		1520.46	672.418		1520.46	670.54		1520.31	677.365		1521.34	665.688		11.0881
	2051.89	677.993		2051.89	679.284		2051.89	681.752		2051.89	685.065		2051.89	687.891		2051.89	691.397		11.0298	1.65815		11.0298	749.798		11.0298	1457.26		11.0298	2156.88		11.0298	2902.25		11.0298	3585.7		1521.33	671.655		1521.33	675.631		1521.19	675.229		1522.22	665.233		11.105
	2054.12	677.266		2054.12	680.102		2054.12	680.934		2054.12	685.247		2054.12	688.346		2054.12	692.579		11.0465	1.9766		11.0465	749.6		11.0465	1457.93		11.0465	2156.4		11.0465	2902.18		11.0465	3585.25		1522.2	674.455		1522.2	671.558		1522.06	678.502		1523.09	663.233		11.122
	2056.34	677.902		2056.34	680.284		2056.34	682.025		2056.34	684.429		2056.34	688.891		2056.34	691.76		11.0633	2.06738		11.0633	748.501		11.0633	1458.27		11.0633	2156.29		11.0633	2902.92		11.0633	3584.36		1523.08	674.073		1523.08	672.322		1522.94	676.093		1523.97	664.506		11.139
	2058.56	677.447		2058.56	679.284		2058.56	682.479		2058.56	684.701		2058.56	688.073		2058.56	691.851		11.0801	2.02263		11.0801	747.089		11.0801	1457.1		11.0801	2156.04		11.0801	2903.48		11.0801	3584.48		1523.95	671.4		1523.95	669.012		1523.81	676.184		1524.84	664.142		11.1559
	2060.78	678.175		2060.78	679.375		2060.78	681.752		2060.78	684.065		2060.78	687.891		2060.78	691.67		11.0968	1.7044		11.0968	747.982		11.0968	1459.78		11.0968	2157.08		11.0968	2904.38		11.0968	3585.08		1524.82	673.818		1524.82	671.812		1524.69	678.002		1525.72	665.233		11.1729
	2063	678.266		2063	680.011		2063	681.934		2063	684.792		2063	688.528		2063	692.488		11.1136	1.61229		11.1136	748.772		11.1136	1459.75		11.1136	2157.05		11.1136	2905.21		11.1136	3585.12		1525.69	672.927		1525.69	669.776		1525.56	677.456		1526.59	662.324		11.1899
	2065.22	677.538		2065.22	679.829		2065.22	681.934		2065.22	685.611		2065.22	689.619		2065.22	691.488		11.1304	2.41465		11.1304	750.656		11.1304	1460.28		11.1304	2157.48		11.1304	2905.29		11.1304	3586.92		1526.57	675.346		1526.57	671.049		1526.43	677.138		1527.47	665.324		11.2069
	2067.44	678.538		2067.44	679.284		2067.44	681.297		2067.44	685.974		2067.44	689.891		2067.44	692.579		11.1472	2.13778		11.1472	750.642		11.1472	1458.55		11.1472	2157.38		11.1472	2904.39		11.1472	3586.53		1527.44	674.455		1527.44	670.285		1527.31	675.411		1528.34	664.96		11.2238
	2069.66	678.356		2069.66	679.556		2069.66	681.479		2069.66	684.338		2069.66	688.891		2069.66	692.76		11.1639	1.97078		11.1639	749.579		11.1639	1458.92		11.1639	2157.3		11.1639	2903.42		11.1639	3586.48		1528.31	675.346		1528.31	669.776		1528.18	675.865		1529.22	664.688		11.2408
	2071.87	678.356		2071.87	679.102		2071.87	682.025		2071.87	685.701		2071.87	688.528		2071.87	692.306		11.1807	2.1469		11.1807	748.957		11.1807	1460.14		11.1807	2156.98		11.1807	2903.5		11.1807	3586.17		1529.18	675.855		1529.18	673.849		1529.05	676.184		1530.09	663.96		11.2578
	2074.09	678.266		2074.09	679.92		2074.09	682.57		2074.09	684.883		2074.09	687.164		2074.09	691.397		11.1975	2.71402		11.1975	750.136		11.1975	1461.36		11.1975	2156.72		11.1975	2903.76		11.1975	3586.24		1530.06	673.182		1530.06	673.085		1529.93	675.684		1530.96	663.96		11.2747
	2076.31	677.902		2076.31	679.829		2076.31	681.661		2076.31	685.792		2076.31	689.437		2076.31	691.67		11.2143	3.47407		11.2143	750.613		11.2143	1463.48		11.2143	2156.96		11.2143	2904.9		11.2143	3586.7		1530.93	673.055		1530.93	671.812		1530.8	674.775		1531.84	664.869		11.2917
	2078.52	677.902		2078.52	679.92		2078.52	680.752		2078.52	684.429		2078.52	688.437		2078.52	690.67		11.231	3.73095		11.231	750.775		11.231	1463.33		11.231	2158.09		11.231	2905.89		11.231	3587.96		1531.8	673.946		1531.8	673.594		1531.67	675.684		1532.71	663.415		11.3087
	2080.73	678.175		2080.73	679.465		2080.73	682.206		2080.73	685.429		2080.73	689.255		2080.73	692.215		11.2478	3.93467		11.2478	750.859		11.2478	1464.33		11.2478	2159.22		11.2478	2907.12		11.2478	3589.08		1532.67	675.218		1532.67	670.54		1532.55	675.956		1533.59	662.96		11.3257
	2082.95	677.902		2082.95	680.193		2082.95	682.297		2082.95	685.52		2082.95	688.8		2082.95	692.124		11.2646	3.86499		11.2646	750.883		11.2646	1464.99		11.2646	2159.28		11.2646	2906.35		11.2646	3588.37		1533.54	673.182		1533.54	670.794		1533.42	674.729		1534.46	662.96		11.3426
	2085.16	677.084		2085.16	679.647		2085.16	682.752		2085.16	685.429		2085.16	687.164		2085.16	692.488		11.2814	3.80262		11.2814	750.689		11.2814	1464.24		11.2814	2159.17		11.2814	2906.08		11.2814	3588.11		1534.42	673.564		1534.42	671.812		1534.29	675.32		1535.34	661.506		11.3596
	2087.37	678.538		2087.37	679.465		2087.37	681.934		2087.37	684.429		2087.37	689.346		2087.37	691.033		11.2981	3.35906		11.2981	749.921		11.2981	1461.64		11.2981	2158.33		11.2981	2906.16		11.2981	3587.46		1535.29	672.418		1535.29	668.758		1535.17	676.775		1536.21	660.96		11.3766
	2089.58	677.993		2089.58	679.556		2089.58	682.297		2089.58	685.52		2089.58	689.255		2089.58	691.67		11.3149	3.0479		11.3149	750.981		11.3149	1458.84		11.3149	2158.23		11.3149	2906.62		11.3149	3589.27		1536.16	674.327		1536.16	675.376		1536.04	674.093		1537.08	664.869		11.3936
	2091.79	678.175		2091.79	679.647		2091.79	682.479		2091.79	685.156		2091.79	688.8		2091.79	692.215		11.3317	3.30469		11.3317	751.741		11.3317	1458.93		11.3317	2157.68		11.3317	2907.27		11.3317	3589.79		1537.03	674.073		1537.03	670.794		1536.91	676.502		1537.96	662.597		11.4105
	2094	677.902		2094	679.647		2094	683.297		2094	685.701		2094	688.255		2094	692.67		11.3485	3.46841		11.3485	752.171		11.3485	1460.75		11.3485	2157.39		11.3485	2907.19		11.3485	3588.93		1537.9	672.8		1537.9	672.322		1537.78	674.638		1538.83	662.142		11.4275
	2096.21	678.447		2096.21	679.647		2096.21	682.388		2096.21	685.156		2096.21	688.528		2096.21	692.033		11.3652	3.36195		11.3652	751.042		11.3652	1462.66		11.3652	2157.48		11.3652	2908.18		11.3652	3588.85		1538.77	674.709		1538.77	669.776		1538.66	673.184		1539.7	660.96		11.4445
	2098.42	678.175		2098.42	679.647		2098.42	681.661		2098.42	686.156		2098.42	687.71		2098.42	694.033		11.382	3.17078		11.382	751.168		11.382	1464.15		11.382	2158.69		11.382	2908.38		11.382	3588.73		1539.64	672.036		1539.64	671.558		1539.53	674.593		1540.58	661.506		11.4614
	2100.63	677.72		2100.63	679.829		2100.63	682.297		2100.63	684.52		2100.63	688.71		2100.63	691.488		11.3988	3.61661		11.3988	751.658		11.3988	1462.44		11.3988	2158.74		11.3988	2907.51		11.3988	3589.38		1540.51	677.636		1540.51	667.994		1540.4	672.547		1541.45	661.142		11.4784
	2102.83	678.266		2102.83	680.375		2102.83	681.843		2102.83	685.247		2102.83	688.073		2102.83	693.033		11.4156	4.10702		11.4156	752.067		11.4156	1465.16		11.4156	2158.91		11.4156	2906.68		11.4156	3590.63		1541.39	672.291		1541.39	674.103		1541.27	673.002		1542.32	659.415		11.4954
	2105.04	678.629		2105.04	679.193		2105.04	682.661		2105.04	684.883		2105.04	687.8		2105.04	691.76		11.4323	3.82252		11.4323	749.751		11.4323	1464.64		11.4323	2157.75		11.4323	2906.97		11.4323	3591.46		1542.26	672.673		1542.26	670.031		1542.14	674.229		1543.2	660.869		11.5124
	2107.24	677.72		2107.24	679.284		2107.24	681.843		2107.24	685.52		2107.24	688.437		2107.24	691.76		11.4491	4.27133		11.4491	748.633		11.4491	1466.9		11.4491	2157.82		11.4491	2907.55		11.4491	3592.74		1543.13	672.927		1543.13	670.285		1543.02	672.684		1544.07	660.688		11.5293
	2109.45	678.266		2109.45	679.284		2109.45	682.206		2109.45	685.611		2109.45	688.437		2109.45	692.215		11.4659	3.92478		11.4659	749.395		11.4659	1466.24		11.4659	2157.87		11.4659	2907.23		11.4659	3592.38		1544	673.818		1544	670.031		1543.89	671.593		1544.94	659.506		11.5463
	2111.65	678.993		2111.65	679.375		2111.65	681.752		2111.65	685.701		2111.65	687.982		2111.65	691.851		11.4827	4.25459		11.4827	751.008		11.4827	1467.07		11.4827	2158.71		11.4827	2907.14		11.4827	3592.41		1544.87	672.164		1544.87	665.703		1544.76	673.411		1545.81	659.142		11.5633
	2113.85	678.538		2113.85	679.556		2113.85	682.752		2113.85	685.065		2113.85	687.619		2113.85	692.306		11.4994	3.65344		11.4994	751.74		11.4994	1466.59		11.4994	2159.16		11.4994	2907.12		11.4994	3591.9		1545.74	674.327		1545.74	672.067		1545.63	671.229		1546.69	658.506		11.5803
	2116.06	678.447		2116.06	680.102		2116.06	682.479		2116.06	683.974		2116.06	688.073		2116.06	690.397		11.5162	3.2332		11.5162	752.021		11.5162	1465.27		11.5162	2158.53		11.5162	2906.88		11.5162	3591.43		1546.61	676.873		1546.61	670.031		1546.5	671.865		1547.56	659.233		11.5972
	2118.26	677.993		2118.26	679.556		2118.26	681.843		2118.26	684.792		2118.26	688.346		2118.26	691.397		11.533	3.34606		11.533	751.864		11.533	1464.47		11.533	2158.65		11.533	2907.31		11.533	3590.95		1547.48	672.673		1547.48	671.303		1547.37	671.32		1548.43	658.869		11.6142
	2120.46	677.266		2120.46	680.556		2120.46	682.752		2120.46	686.156		2120.46	688.164		2120.46	692.306		11.5498	3.59427		11.5498	752.064		11.5498	1461.29		11.5498	2158.65		11.5498	2907.47		11.5498	3589.73		1548.35	674.964		1548.35	671.303		1548.24	669.729		1549.3	656.597		11.6312
	2122.66	678.447		2122.66	678.92		2122.66	681.843		2122.66	685.156		2122.66	688.346		2122.66	690.76		11.5665	3.94596		11.5665	752.204		11.5665	1461.39		11.5665	2159.49		11.5665	2907.79		11.5665	3591.11		1549.22	675.218		1549.22	667.231		1549.12	671.093		1550.17	658.324		11.6481
	2124.85	678.175		2124.85	679.375		2124.85	682.116		2124.85	686.701		2124.85	688.891		2124.85	691.579		11.5833	3.43202		11.5833	751.729		11.5833	1461.06		11.5833	2159.31		11.5833	2907.23		11.5833	3590.08		1550.09	673.691		1550.09	667.994		1549.99	670.956		1551.05	657.415		11.6651
	2127.05	677.356		2127.05	679.738		2127.05	682.752		2127.05	684.701		2127.05	689.073		2127.05	692.124		11.6001	3.88311		11.6001	751.908		11.6001	1460.98		11.6001	2159.62		11.6001	2907.84		11.6001	3590.02		1550.96	673.818		1550.96	667.231		1550.86	670.229		1551.92	658.779		11.6821
	2129.25	677.993		2129.25	680.102		2129.25	681.479		2129.25	684.338		2129.25	687.619		2129.25	691.306		11.6169	3.73639		11.6169	752.134		11.6169	1462.55		11.6169	2159.53		11.6169	2907.44		11.6169	3588.89		1551.83	671.273		1551.83	666.976		1551.73	670.593		1552.79	657.96		11.6991
	2131.45	678.629		2131.45	680.011		2131.45	682.025		2131.45	685.52		2131.45	688.8		2131.45	691.397		11.6336	3.56912		11.6336	750.789		11.6336	1464.93		11.6336	2159.47		11.6336	2907.26		11.6336	3588.51		1552.7	671.527		1552.7	669.522		1552.6	670.547		1553.66	659.415		11.716
	2133.64	677.993		2133.64	679.375		2133.64	681.843		2133.64	684.429		2133.64	688.982		2133.64	691.033		11.6504	3.75882		11.6504	750.063		11.6504	1468.06		11.6504	2159.81		11.6504	2907.61		11.6504	3589.61		1553.57	673.182		1553.57	666.212		1553.47	669.547		1554.53	656.779		11.733
	2135.84	677.993		2135.84	680.284		2135.84	682.388		2135.84	684.883		2135.84	688.982		2135.84	692.033		11.6672	3.67509		11.6672	748.682		11.6672	1467.84		11.6672	2160.45		11.6672	2907.13		11.6672	3590.65		1554.43	676.364		1554.43	670.54		1554.34	668.547		1555.4	654.233		11.75
	2138.03	677.811		2138.03	679.284		2138.03	681.661		2138.03	684.792		2138.03	687.982		2138.03	691.215		11.684	4.43776		11.684	749.499		11.684	1467.55		11.684	2161.15		11.684	2907.16		11.684	3591.84		1555.3	673.436		1555.3	664.685		1555.21	669.002		1556.28	655.233		11.767
	2140.22	678.084		2140.22	679.738		2140.22	681.206		2140.22	684.701		2140.22	688.073		2140.22	693.033		11.7007	4.35051		11.7007	750.565		11.7007	1466.25		11.7007	2160.92		11.7007	2906.76		11.7007	3592.16		1556.17	671.146		1556.17	664.94		1556.08	668.32		1557.15	653.779		11.7839
	2142.42	678.356		2142.42	680.102		2142.42	681.843		2142.42	685.065		2142.42	688.255		2142.42	692.124		11.7175	4.46838		11.7175	751.575		11.7175	1465.57		11.7175	2161.06		11.7175	2906.7		11.7175	3591.85		1557.04	670.509		1557.04	665.194		1556.95	668.138		1558.02	656.688		11.8009
	2144.61	677.993		2144.61	678.829		2144.61	682.297		2144.61	685.883		2144.61	687.71		2144.61	692.851		11.7343	4.8792		11.7343	752.26		11.7343	1467.01		11.7343	2161.21		11.7343	2907.27		11.7343	3591.47		1557.91	671.782		1557.91	665.958		1557.82	667.047		1558.89	653.96		11.8179
	2146.8	678.084		2146.8	678.102		2146.8	682.025		2146.8	684.611		2146.8	688.346		2146.8	691.67		11.7511	4.66395		11.7511	752.788		11.7511	1469.59		11.7511	2160.81		11.7511	2906.96		11.7511	3590.51		1558.78	672.036		1558.78	666.976		1558.69	665.82		1559.76	654.869		11.8348
	2148.99	677.72		2148.99	679.375		2148.99	681.843		2148.99	685.792		2148.99	688.073		2148.99	691.851		11.7678	5.12624		11.7678	752.865		11.7678	1468.46		11.7678	2159.67		11.7678	2907.17		11.7678	3590.64		1559.65	673.055		1559.65	665.703		1559.56	666.365		1560.63	655.597		11.8518
	2151.18	678.084		2151.18	680.375		2151.18	682.479		2151.18	684.156		2151.18	688.164		2151.18	692.306		11.7846	5.17253		11.7846	753.295		11.7846	1465.97		11.7846	2159.07		11.7846	2906.56		11.7846	3589.96		1560.52	673.055		1560.52	665.703		1560.43	666.865		1561.5	653.415		11.8688
	2153.37	678.084		2153.37	679.829		2153.37	682.57		2153.37	685.792		2153.37	688.8		2153.37	692.67		11.8014	4.65714		11.8014	753.908		11.8014	1464.32		11.8014	2158.31		11.8014	2906.9		11.8014	3590.78		1561.38	673.055		1561.38	664.94		1561.3	665.82		1562.37	654.506		11.8858
	2155.56	678.266		2155.56	679.738		2155.56	682.206		2155.56	685.701		2155.56	688.255		2155.56	690.942		11.8181	4.38551		11.8181	753.931		11.8181	1465.18		11.8181	2159.39		11.8181	2907.13		11.8181	3590.64		1562.25	671.782		1562.25	662.649		1562.17	665.502		1563.24	653.142		11.9027
	2157.74	678.175		2157.74	679.92		2157.74	682.479		2157.74	685.156		2157.74	687.982		2157.74	691.124		11.8349	4.12603		11.8349	754.211		11.8349	1466.28		11.8349	2159.76		11.8349	2907.56		11.8349	3590.46		1563.12	669.618		1563.12	663.412		1563.04	666.456		1564.11	654.142		11.9197
	2159.93	677.538		2159.93	679.829		2159.93	681.752		2159.93	683.701		2159.93	687.891		2159.93	691.306		11.8517	5.16593		11.8517	753.504		11.8517	1465.41		11.8517	2160.86		11.8517	2907.96		11.8517	3590.02		1563.99	672.546		1563.99	664.685		1563.91	665.547		1564.98	653.142		11.9367
	2162.12	677.902		2162.12	679.284		2162.12	681.388		2162.12	685.247		2162.12	687.8		2162.12	691.579		11.8685	4.7723		11.8685	751.901		11.8685	1464.79		11.8685	2160.37		11.8685	2907.23		11.8685	3589.04		1564.86	670.382		1564.86	665.703		1564.78	665.32		1565.85	652.142		11.9537
	2164.3	677.811		2164.3	680.284		2164.3	681.57		2164.3	685.338		2164.3	688.073		2164.3	692.397		11.8852	4.44975		11.8852	751.689		11.8852	1463.91		11.8852	2159.67		11.8852	2906.92		11.8852	3587.65		1565.72	669.746		1565.72	663.158		1565.64	665.138		1566.72	652.779		11.9706
	2166.49	677.902		2166.49	679.556		2166.49	681.934		2166.49	685.429		2166.49	688.346		2166.49	691.397		11.902	3.40958		11.902	750.306		11.902	1461.04		11.902	2159.29		11.902	2905.59		11.902	3588.7		1566.59	671.018		1566.59	669.522		1566.51	664.684		1567.59	653.688		11.9876
	2168.67	677.266		2168.67	679.647		2168.67	682.752		2168.67	685.792		2168.67	688.528		2168.67	691.851		11.9188	3.26565		11.9188	749.737		11.9188	1460.3		11.9188	2159		11.9188	2905.01		11.9188	3589.01		1567.46	671.018		1567.46	664.431		1567.38	663.547		1568.46	651.051		12.0046
	2170.85	677.72		2170.85	679.193		2170.85	682.025		2170.85	685.156		2170.85	688.71		2170.85	692.124		11.9356	3.34031		11.9356	750.635		11.9356	1460.15		11.9356	2160.09		11.9356	2905.37		11.9356	3590.41		1568.33	671.273		1568.33	664.431		1568.25	663.729		1569.33	650.506		12.0216
	2173.03	678.084		2173.03	679.556		2173.03	681.934		2173.03	684.156		2173.03	689.346		2173.03	691.124		11.9523	3.05199		11.9523	751.404		11.9523	1462.71		11.9523	2159.39		11.9523	2905.16		11.9523	3590.28		1569.2	672.418		1569.2	667.231		1569.12	663.32		1570.2	651.506		12.0385
	2175.22	678.811		2175.22	679.829		2175.22	682.116		2175.22	684.52		2175.22	688.346		2175.22	691.942		11.9691	3.86162		11.9691	752.981		11.9691	1464.6		11.9691	2158.46		11.9691	2905.2		11.9691	3590.17		1570.06	669.873		1570.06	661.376		1569.99	663.729		1571.07	649.688		12.0555
	2177.4	677.447		2177.4	679.556		2177.4	682.388		2177.4	685.611		2177.4	687.8		2177.4	692.397		11.9859	3.49653		11.9859	752.95		11.9859	1463.9		11.9859	2157.43		11.9859	2904.12		11.9859	3590.33		1570.93	669.873		1570.93	664.685		1570.86	662.365		1571.94	649.779		12.0725
	2179.58	677.902		2179.58	680.102		2179.58	682.206		2179.58	686.247		2179.58	687.255		2179.58	692.397		12.0027	3.04922		12.0027	753.524		12.0027	1460.7		12.0027	2157.56		12.0027	2903.94		12.0027	3589.91		1571.8	671.273		1571.8	663.412		1571.72	663.275		1572.81	650.597		12.0894
	2181.75	678.175		2181.75	679.375		2181.75	682.206		2181.75	684.883		2181.75	687.528		2181.75	690.942		12.0195	2.50784		12.0195	753.734		12.0195	1460.72		12.0195	2157.96		12.0195	2904.38		12.0195	3590.02		1572.66	669.618		1572.66	663.158		1572.59	661.275		1573.68	649.415		12.1064
	2183.93	678.538		2183.93	679.556		2183.93	680.752		2183.93	684.974		2183.93	687.891		2183.93	691.579		12.0362	3.13667		12.0362	753.271		12.0362	1462.34		12.0362	2158.62		12.0362	2905.15		12.0362	3588.73		1573.53	672.418		1573.53	661.122		1573.46	660.775		1574.55	651.779		12.1234
	2186.11	677.629		2186.11	679.738		2186.11	681.934		2186.11	685.065		2186.11	688.437		2186.11	691.851		12.053	4.14564		12.053	752.662		12.053	1465.42		12.053	2159.43		12.053	2905.99		12.053	3588.96		1574.4	669.236		1574.4	664.685		1574.33	660.456		1575.42	650.233		12.1404
	2188.29	678.266		2188.29	679.465		2188.29	681.752		2188.29	685.611		2188.29	687.982		2188.29	691.942		12.0698	3.93838		12.0698	752.163		12.0698	1466.96		12.0698	2159.5		12.0698	2906.03		12.0698	3588.61		1575.26	667.455		1575.26	663.922		1575.2	660.093		1576.29	649.869		12.1573
	2190.46	678.266		2190.46	679.102		2190.46	682.661		2190.46	685.792		2190.46	688.71		2190.46	691.579		12.0865	3.55921		12.0865	751.743		12.0865	1466.67		12.0865	2160.15		12.0865	2905.1		12.0865	3588.82		1576.13	671.018		1576.13	660.612		1576.06	661.275		1577.16	647.597		12.1743
	2192.64	678.084		2192.64	679.647		2192.64	683.116		2192.64	685.065		2192.64	688.346		2192.64	691.033		12.1033	2.83709		12.1033	750.818		12.1033	1465.12		12.1033	2160.02		12.1033	2904.97		12.1033	3588.66		1577	672.291		1577	658.576		1576.93	659.82		1578.02	649.779		12.1913
	2194.81	678.538		2194.81	680.011		2194.81	681.661		2194.81	685.429		2194.81	688.164		2194.81	691.851		12.1201	3.22327		12.1201	749.962		12.1201	1463.08		12.1201	2159.98		12.1201	2904.94		12.1201	3588.68		1577.86	668.855		1577.86	659.34		1577.8	659.502		1578.89	648.96		12.2083
	2196.99	678.629		2196.99	679.829		2196.99	681.388		2196.99	685.065		2196.99	687.073		2196.99	691.397		12.1369	3.7224		12.1369	751.186		12.1369	1461.5		12.1369	2159.86		12.1369	2906.19		12.1369	3590.21		1578.73	668.855		1578.73	661.631		1578.67	660.184		1579.76	648.233		12.2252
	2199.16	677.993		2199.16	679.375		2199.16	681.934		2199.16	685.247		2199.16	687.891		2199.16	691.397		12.1536	3.5218		12.1536	751.633		12.1536	1462.79		12.1536	2159.81		12.1536	2907.26		12.1536	3590		1579.6	671.4		1579.6	660.103		1579.53	659.047		1580.63	648.415		12.2422
	2201.33	679.084		2201.33	679.738		2201.33	682.479		2201.33	684.701		2201.33	688.073		2201.33	691.306		12.1704	3.40926		12.1704	751.283		12.1704	1463.77		12.1704	2160.12		12.1704	2907.62		12.1704	3589.56		1580.46	668.982		1580.46	659.594		1580.4	659.547		1581.5	647.506		12.2592
																			12.1872	2.24456		12.1872	749.08		12.1872	1463.67		12.1872	2160.04		12.1872	2907.15		12.1872	3587.83		1581.33	670.764		1581.33	660.103		1581.27	658.547		1582.37	648.597		12.2761
																			12.204	1.14778		12.204	747.43		12.204	1462.21		12.204	2160.29		12.204	2906.33		12.204	3588.46		1582.19	668.6		1582.19	661.376		1582.14	658.593		1583.23	648.051		12.2931
																			12.2207	0.69369		12.2207	747.592		12.2207	1461.08		12.2207	2159.15		12.2207	2905.61		12.2207	3588.67		1583.06	670.764		1583.06	661.885		1583	657.456		1584.1	646.869		12.3101
																			12.2375	1.30359		12.2375	747.704		12.2375	1460.54		12.2375	2159.17		12.2375	2904.78		12.2375	3589.8		1583.92	666.309		1583.92	660.612		1583.87	658.093		1584.97	646.233		12.3271
																			12.2543	1.53754		12.2543	748.039		12.2543	1460.99		12.2543	2159.1		12.2543	2904.74		12.2543	3589.97		1584.79	667.582		1584.79	658.322		1584.74	657.82		1585.84	646.142		12.344
																			12.2711	2.26682		12.2711	747.612		12.2711	1461.07		12.2711	2159.39		12.2711	2905.16		12.2711	3589.87		1585.66	666.818		1585.66	659.849		1585.6	656.32		1586.7	645.779		12.361
																			12.2878	2.36533		12.2878	747.91		12.2878	1462.09		12.2878	2159.87		12.2878	2906.18		12.2878	3590.38		1586.52	667.455		1586.52	658.831		1586.47	656.229		1587.57	644.233		12.378
																			12.3046	2.72558		12.3046	748.515		12.3046	1462.67		12.3046	2160.09		12.3046	2906.68		12.3046	3590.68		1587.39	666.691		1587.39	658.576		1587.34	655.411		1588.44	645.324		12.395
																			12.3214	1.84202		12.3214	750.109		12.3214	1465.48		12.3214	2160.32		12.3214	2905.93		12.3214	3590.58		1588.25	667.455		1588.25	654.249		1588.2	655.593		1589.31	646.051		12.4119
																			12.3382	2.02074		12.3382	751.123		12.3382	1464.22		12.3382	2160.11		12.3382	2904.88		12.3382	3588.78		1589.12	667.327		1589.12	654.503		1589.07	655.684		1590.17	645.051		12.4289
																			12.3549	2.04132		12.3549	750.919		12.3549	1464.75		12.3549	2160.47		12.3549	2904.76		12.3549	3587.88		1589.98	668.855		1589.98	657.303		1589.93	655.365		1591.04	642.869		12.4459
																			12.3717	2.99543		12.3717	749.071		12.3717	1463.3		12.3717	2160.85		12.3717	2905.47		12.3717	3587.25		1590.85	670.127		1590.85	654.249		1590.8	653.32		1591.91	643.142		12.4628
																			12.3885	3.43187		12.3885	747.979		12.3885	1465.28		12.3885	2160.07		12.3885	2905.76		12.3885	3587.02		1591.71	667.2		1591.71	659.594		1591.67	653.684		1592.77	644.142		12.4798
																			12.4053	4.07686		12.4053	748.524		12.4053	1466.56		12.4053	2159.85		12.4053	2905.78		12.4053	3587.5		1592.57	664.527		1592.57	655.012		1592.53	654.684		1593.64	645.051		12.4968
																			12.422	4.50871		12.422	751.319		12.422	1467.06		12.422	2160.06		12.422	2906.03		12.422	3588.77		1593.44	668.346		1593.44	656.54		1593.4	653.411		1594.51	644.688		12.5138
																			12.4388	3.88284		12.4388	752.343		12.4388	1465.23		12.4388	2160.08		12.4388	2906.65		12.4388	3589.79		1594.3	667.455		1594.3	655.522		1594.26	653.911		1595.37	643.142		12.5307
																			12.4556	4.05562		12.4556	752.296		12.4556	1464.98		12.4556	2160.72		12.4556	2906.79		12.4556	3589.35		1595.17	664.527		1595.17	654.249		1595.13	654.547		1596.24	642.142		12.5477
																			12.4724	3.93522		12.4724	752.031		12.4724	1464.05		12.4724	2161.37		12.4724	2906.73		12.4724	3588.94		1596.03	666.309		1596.03	656.794		1595.99	652.865		1597.11	643.233		12.5647
																			12.4891	4.72639		12.4891	752.111		12.4891	1465.56		12.4891	2162.38		12.4891	2907.33		12.4891	3590.86		1596.9	666.946		1596.9	656.54		1596.86	653.32		1597.97	642.142		12.5817
																			12.5059	4.44066		12.5059	752.497		12.5059	1465.53		12.5059	2162.35		12.5059	2907.31		12.5059	3592.56		1597.76	667.709		1597.76	654.758		1597.72	652.865		1598.84	641.597		12.5986
																			12.5227	4.91068		12.5227	752.661		12.5227	1466.97		12.5227	2162		12.5227	2907.99		12.5227	3594.94		1598.62	667.836		1598.62	656.285		1598.59	650.911		1599.71	640.597		12.6156
																			12.5395	4.65381		12.5395	752.111		12.5395	1468.47		12.5395	2161.33		12.5395	2908.65		12.5395	3594.26		1599.49	664.655		1599.49	654.758		1599.45	650.229		1600.57	642.506		12.6326
																			12.5562	4.56487		12.5562	751.757		12.5562	1467.89		12.5562	2161.51		12.5562	2909.77		12.5562	3593.92		1600.35	663.636		1600.35	653.994		1600.32	650.275		1601.44	640.96		12.6495
																			12.573	4.38264		12.573	751.115		12.573	1467.5		12.573	2161.62		12.573	2909.57		12.573	3594.68		1601.21	665.8		1601.21	652.976		1601.18	650.775		1602.3	640.415		12.6665
																			12.5898	4.44562		12.5898	750.277		12.5898	1467.5		12.5898	2161.78		12.5898	2908.5		12.5898	3595.6		1602.08	665.673		1602.08	655.012		1602.05	648.775		1603.17	640.415		12.6835
																			12.6066	4.57149		12.6066	750.905		12.6066	1468.77		12.6066	2162.97		12.6066	2907.95		12.6066	3596.87		1602.94	666.055		1602.94	652.722		1602.91	649.911		1604.03	641.779		12.7005
																			12.6233	4.36013		12.6233	751.095		12.6233	1469.49		12.6233	2163		12.6233	2907.27		12.6233	3595.88		1603.8	662.873		1603.8	651.703		1603.78	648.729		1604.9	640.051		12.7174
																			12.6401	4.57466		12.6401	752.498		12.6401	1470.13		12.6401	2163.25		12.6401	2907.07		12.6401	3594.31		1604.67	664.782		1604.67	655.522		1604.64	648.956		1605.76	639.779		12.7344
																			12.6569	4.70818		12.6569	753.507		12.6569	1471.55		12.6569	2162.05		12.6569	2907.44		12.6569	3594.02		1605.53	663.764		1605.53	651.703		1605.5	649.865		1606.63	639.142		12.7514
																			12.6737	4.11216		12.6737	753.559		12.6737	1472.23		12.6737	2161.2		12.6737	2907.2		12.6737	3594.43		1606.39	664.782		1606.39	654.249		1606.37	648.365		1607.49	637.324		12.7684
																			12.6904	4.03685		12.6904	753.589		12.6904	1471.13		12.6904	2161.05		12.6904	2907.45		12.6904	3595.64		1607.25	661.346		1607.25	653.485		1607.23	647.502		1608.36	638.233		12.7853
																			12.7072	4.70126		12.7072	752.377		12.7072	1469.07		12.7072	2160.97		12.7072	2907.5		12.7072	3596.54		1608.12	664.527		1608.12	653.231		1608.1	647.956		1609.22	639.779		12.8023
																			12.724	5.71012		12.724	751.886		12.724	1468.35		12.724	2162.19		12.724	2908.16		12.724	3597.84		1608.98	660.709		1608.98	650.176		1608.96	647.047		1610.09	638.233		12.8193
																			12.7408	5.83372		12.7408	751.023		12.7408	1468.02		12.7408	2161.87		12.7408	2907.74		12.7408	3598		1609.84	662.873		1609.84	652.467		1609.82	647.729		1610.95	638.324		12.8362
																			12.7575	5.72978		12.7575	751.703		12.7575	1467.07		12.7575	2162.36		12.7575	2907.59		12.7575	3597.67		1610.7	662.873		1610.7	650.431		1610.69	647.275		1611.82	638.051		12.8532
																			12.7743	6.33214		12.7743	752		12.7743	1467.11		12.7743	2161.81		12.7743	2907.67		12.7743	3596.82		1611.57	661.218		1611.57	651.194		1611.55	645.456		1612.68	637.142		12.8702
																			12.7911	6.95376		12.7911	751.98		12.7911	1467.89		12.7911	2161.59		12.7911	2907.72		12.7911	3597.07		1612.43	661.473		1612.43	648.14		1612.41	647.32		1613.55	636.233		12.8872
																			12.8078	7.31019		12.8078	752.183		12.8078	1469.09		12.8078	2161.88		12.8078	2908.41		12.8078	3596.79		1613.29	663.891		1613.29	653.485		1613.28	646.502		1614.41	638.779		12.9041
																			12.8246	7.11074		12.8246	752.293		12.8246	1468.24		12.8246	2161.99		12.8246	2908.25		12.8246	3596.38		1614.15	660.709		1614.15	650.431		1614.14	645.775		1615.27	638.233		12.9211
																			12.8414	6.72248		12.8414	753.144		12.8414	1467.56		12.8414	2162.46		12.8414	2908.41		12.8414	3596.52		1615.01	663.127		1615.01	649.158		1615	644.956		1616.14	637.233		12.9381
																			12.8582	6.07412		12.8582	752.757		12.8582	1469.94		12.8582	2162.98		12.8582	2909.22		12.8582	3596.84		1615.88	663.127		1615.88	649.158		1615.86	644.684		1617	636.597		12.9551
																			12.8749	5.96743		12.8749	753.671		12.8749	1472.08		12.8749	2163.61		12.8749	2910.19		12.8749	3598.04		1616.74	662.618		1616.74	649.667		1616.73	644.365		1617.87	636.779		12.972
																			12.8917	6.20829		12.8917	753.629		12.8917	1472.49		12.8917	2164.13		12.8917	2909.64		12.8917	3598.71		1617.6	660.964		1617.6	648.903		1617.59	644.638		1618.73	637.142		12.989
																			12.9085	6.75005		12.9085	753.866		12.9085	1472.48		12.9085	2163.77		12.9085	2909.27		12.9085	3599.27		1618.46	662.491		1618.46	650.685		1618.45	644.684		1619.59	636.415		13.006
																			12.9253	7.60383		12.9253	754.143		12.9253	1471.82		12.9253	2164.16		12.9253	2909.28		12.9253	3598.69		1619.32	660.582		1619.32	651.449		1619.32	643.865		1620.46	635.869		13.0229
																			12.942	8.03967		12.942	754.764		12.942	1472.85		12.942	2164.05		12.942	2909.82		12.942	3599.17		1620.18	662.618		1620.18	648.649		1620.18	643.502		1621.32	635.869		13.0399
																			12.9588	8.78551		12.9588	754.439		12.9588	1474.35		12.9588	2165.22		12.9588	2909.95		12.9588	3600.54		1621.04	658.927		1621.04	646.867		1621.04	642.911		1622.18	635.597		13.0569
																			12.9756	8.0725		12.9756	753.698		12.9756	1475.1		12.9756	2164.11		12.9756	2908.74		12.9756	3599.93		1621.9	658.036		1621.9	649.667		1621.9	642.82		1623.05	635.324		13.0739
																			12.9924	7.58685		12.9924	753.119		12.9924	1474.31		12.9924	2163.19		12.9924	2908.86		12.9924	3598.57		1622.77	659.182		1622.77	646.612		1622.76	644.365		1623.91	636.597		13.0908
																			13.0091	6.30431		13.0091	752.972		13.0091	1471.34		13.0091	2161.39		13.0091	2908.67		13.0091	3595.95		1623.63	658.927		1623.63	649.158		1623.63	643.547		1624.77	634.869		13.1078
																			13.0259	5.8257		13.0259	752.565		13.0259	1469.56		13.0259	2160.75		13.0259	2908.37		13.0259	3593.66		1624.49	659.182		1624.49	649.412		1624.49	643.547		1625.64	634.96		13.1248
																			13.0427	5.82265		13.0427	751.473		13.0427	1468.27		13.0427	2161.07		13.0427	2907.58		13.0427	3593.11		1625.35	660.582		1625.35	645.594		1625.35	642.138		1626.5	635.779		13.1418
																			13.0595	5.59586		13.0595	750.825		13.0595	1467.87		13.0595	2160.48		13.0595	2906.78		13.0595	3592.05		1626.21	660.455		1626.21	647.885		1626.21	642.865		1627.36	634.597		13.1587
																			13.0762	4.63759		13.0762	750.093		13.0762	1466.23		13.0762	2160.1		13.0762	2906.02		13.0762	3591.92		1627.07	659.691		1627.07	645.085		1627.07	642.275		1628.22	635.233		13.1757
																			13.093	3.95291		13.093	749.805		13.093	1465.3		13.093	2159.62		13.093	2904.88		13.093	3591.98		1627.93	660.327		1627.93	648.14		1627.93	642.275		1629.09	635.597		13.1927
																			13.1098	3.84804		13.1098	750.145		13.1098	1464.15		13.1098	2160.31		13.1098	2904.78		13.1098	3593.14		1628.79	659.818		1628.79	645.085		1628.79	642.593		1629.95	634.869		13.2096
																			13.1266	4.11473		13.1266	751.583		13.1266	1463.09		13.1266	2160.72		13.1266	2905.57		13.1266	3593.17		1629.65	657.655		1629.65	647.885		1629.66	641.411		1630.81	634.051		13.2266
																			13.1433	3.16128		13.1433	751.348		13.1433	1461.03		13.1433	2159.56		13.1433	2905.83		13.1433	3591.71		1630.51	658.164		1630.51	646.103		1630.52	641.411		1631.67	634.597		13.2436
																			13.1601	2.70218		13.1601	750.517		13.1601	1461.05		13.1601	2158.65		13.1601	2905.73		13.1601	3589.85		1631.37	656.636		1631.37	643.303		1631.38	640.502		1632.53	632.415		13.2606
																			13.1769	2.99762		13.1769	750.773		13.1769	1459.43		13.1769	2157.58		13.1769	2905.16		13.1769	3589.66		1632.23	657.909		1632.23	647.885		1632.24	640.002		1633.4	635.324		13.2775
																			13.1936	4.13546		13.1936	750.067		13.1936	1461.37		13.1936	2156.99		13.1936	2905.63		13.1936	3590.01		1633.09	657.146		1633.09	644.067		1633.1	641.002		1634.26	633.142		13.2945
																			13.2104	3.91086		13.2104	748.766		13.2104	1461.16		13.2104	2156.54		13.2104	2905.37		13.2104	3588.35		1633.95	657.782		1633.95	645.849		1633.96	641.638		1635.12	633.688		13.3115
																			13.2272	3.65041		13.2272	747.311		13.2272	1462.92		13.2272	2156.51		13.2272	2904.96		13.2272	3588.45		1634.8	656.636		1634.8	645.594		1634.82	639.911		1635.98	634.688		13.3285
																			13.244	2.90963		13.244	746.428		13.244	1460.69		13.244	2156.48		13.244	2904.24		13.244	3587.76		1635.66	657.146		1635.66	642.285		1635.68	639.502		1636.84	632.688		13.3454
																			13.2607	2.889		13.2607	746.676		13.2607	1459.69		13.2607	2156.16		13.2607	2903.88		13.2607	3586.64		1636.52	656.509		1636.52	646.867		1636.54	639.229		1637.7	633.324		13.3624
																			13.2775	2.38845		13.2775	748.152		13.2775	1458.1		13.2775	2156.18		13.2775	2904.15		13.2775	3585.55		1637.38	657.018		1637.38	645.34		1637.4	639.82		1638.56	633.233		13.3794
																			13.2943	1.70391		13.2943	747.86		13.2943	1456.51		13.2943	2155.41		13.2943	2903.75		13.2943	3583.61		1638.24	658.291		1638.24	641.522		1638.26	639.184		1639.43	630.506		13.3963
																			13.3111	1.75521		13.3111	746.491		13.3111	1455.82		13.3111	2155.41		13.3111	2903.12		13.3111	3583.3		1639.1	656.636		1639.1	645.594		1639.12	637.865		1640.29	632.506		13.4133
																			13.3278	1.60189		13.3278	745.501		13.3278	1455.22		13.3278	2155.11		13.3278	2901.94		13.3278	3582.79		1639.96	656		1639.96	643.303		1639.98	638.775		1641.15	632.869		13.4303
																			13.3446	1.27326		13.3446	746.101		13.3446	1457.06		13.3446	2154.79		13.3446	2902.11		13.3446	3583.77		1640.82	655.491		1640.82	643.303		1640.84	638.911		1642.01	632.96		13.4473
																			13.3614	0.90814		13.3614	747.119		13.3614	1459.23		13.3614	2154.5		13.3614	2902.51		13.3614	3584.77		1641.68	658.546		1641.68	642.794		1641.7	638.002		1642.87	632.051		13.4642
																			13.3782	0.51201		13.3782	746.095		13.3782	1460.12		13.3782	2154.95		13.3782	2902.57		13.3782	3585.34		1642.53	655.491		1642.53	644.322		1642.56	637.865		1643.73	632.324		13.4812
																			13.3949	1.18448		13.3949	745.57		13.3949	1459.18		13.3949	2155.12		13.3949	2901.9		13.3949	3584.78		1643.39	655.746		1643.39	644.576		1643.42	637.547		1644.59	631.324		13.4982
																			13.4117	1.54065		13.4117	747.077		13.4117	1459.73		13.4117	2155.64		13.4117	2902.5		13.4117	3586.34		1644.25	655.491		1644.25	641.522		1644.28	638.502		1645.45	630.506		13.5152
																			13.4285	2.76609		13.4285	749.125		13.4285	1460.65		13.4285	2156.59		13.4285	2902.76		13.4285	3587.27		1645.11	658.036		1645.11	643.812		1645.14	636.638		1646.31	631.233		13.5321
																			13.4453	3.49071		13.4453	750.074		13.4453	1461.64		13.4453	2156.39		13.4453	2903.2		13.4453	3588.37		1645.97	653.582		1645.97	641.012		1646	637.184		1647.17	631.233		13.5491
																			13.462	4.5415		13.462	749.56		13.462	1462.68		13.462	2156.44		13.462	2903.79		13.462	3587.08		1646.82	655.746		1646.82	643.049		1646.86	637.638		1648.03	630.142		13.5661
																			13.4788	4.85692		13.4788	748.902		13.4788	1463.2		13.4788	2157.01		13.4788	2904.78		13.4788	3586.61		1647.68	654.346		1647.68	644.576		1647.72	637.547		1648.89	630.324		13.5831
																			13.4956	4.87295		13.4956	749.473		13.4956	1463.41		13.4956	2157.91		13.4956	2904.76		13.4956	3585.69		1648.54	653.964		1648.54	644.576		1648.57	637.002		1649.75	630.506		13.6
																			13.5124	5.33006		13.5124	749.311		13.5124	1463.3		13.5124	2158.72		13.5124	2905.16		13.5124	3586.29		1649.4	652.309		1649.4	643.049		1649.43	636.593		1650.61	632.051		13.617
																			13.5291	5.83125		13.5291	748.281		13.5291	1463.61		13.5291	2158.36		13.5291	2903.96		13.5291	3585.77		1650.25	655.491		1650.25	643.812		1650.29	636.729		1651.47	629.96		13.634
																			13.5459	7.79294		13.5459	749.174		13.5459	1463.25		13.5459	2158.44		13.5459	2904.15		13.5459	3585.37		1651.11	651.927		1651.11	643.558		1651.15	635.502		1652.33	629.869		13.6509
																			13.5627	9.66668		13.5627	750.784		13.5627	1464.65		13.5627	2158.3		13.5627	2904.62		13.5627	3584.19		1651.97	653.709		1651.97	639.485		1652.01	636.275		1653.19	629.779		13.6679
																			13.5795	11.765		13.5795	752.224		13.5795	1465.57		13.5795	2158.9		13.5795	2905.7		13.5795	3585.65		1652.83	653.709		1652.83	640.758		1652.87	636.002		1654.05	630.415		13.6849
																			13.5962	13.6563		13.5962	753.098		13.5962	1467.29		13.5962	2159.52		13.5962	2905.91		13.5962	3587.11		1653.68	652.309		1653.68	639.485		1653.72	635.956		1654.91	630.506		13.7019
																			13.613	15.4291		13.613	752.799		13.613	1467.73		13.613	2160.36		13.613	2905.56		13.613	3588.54		1654.54	654.727		1654.54	642.54		1654.58	636.593		1655.77	630.869		13.7188
																			13.6298	17.0924		13.6298	753.34		13.6298	1467.47		13.6298	2160.54		13.6298	2904.89		13.6298	3589.26		1655.4	654.346		1655.4	642.285		1655.44	635.138		1656.63	628.597		13.7358
																			13.6466	19.9632		13.6466	753.923		13.6466	1465.97		13.6466	2160.72		13.6466	2904.6		13.6466	3590.37		1656.25	654.727		1656.25	643.049		1656.3	635.956		1657.48	628.779		13.7528
																			13.6633	23.0828		13.6633	755.115		13.6633	1465.88		13.6633	2160.96		13.6633	2904.56		13.6633	3592.02		1657.11	654.218		1657.11	638.722		1657.16	635.275		1658.34	630.142		13.7698
																			13.6801	26.2742		13.6801	756.426		13.6801	1467.65		13.6801	2160.82		13.6801	2905.61		13.6801	3591.05		1657.97	653.073		1657.97	642.794		1658.01	635.729		1659.2	630.779		13.7867
																			13.6969	29.7443		13.6969	757.545		13.6969	1470.12		13.6969	2160.5		13.6969	2905.92		13.6969	3591.09		1658.82	654.855		1658.82	642.285		1658.87	634.502		1660.06	629.779		13.8037
																			13.7137	33.4474		13.7137	759.404		13.7137	1472.07		13.7137	2162.03		13.7137	2906.34		13.7137	3589.66		1659.68	654.6		1659.68	641.267		1659.73	635.411		1660.92	628.779		13.8207
																			13.7304	38.0673		13.7304	761.722		13.7304	1473.16		13.7304	2162.67		13.7304	2906.66		13.7304	3591.05		1660.53	654.6		1660.53	640.758		1660.59	634.729		1661.78	628.597		13.8377
																			13.7472	43.2216		13.7472	763.492		13.7472	1475.05		13.7472	2163.65		13.7472	2907.8		13.7472	3591.85		1661.39	651.673		1661.39	640.758		1661.44	634.138		1662.64	629.869		13.8546
																			13.764	49.304		13.764	766.261		13.764	1478.93		13.764	2163.24		13.764	2908.1		13.764	3593.15		1662.25	650.527		1662.25	640.249		1662.3	634.593		1663.49	629.142		13.8716
																			13.7808	54.8354		13.7808	767.163		13.7808	1480.87		13.7808	2162.51		13.7808	2908.29		13.7808	3591.56		1663.1	651.546		1663.1	640.249		1663.16	633.456		1664.35	627.779		13.8886
																			13.7975	61.1052		13.7975	769.401		13.7975	1482.59		13.7975	2161.83		13.7975	2908.54		13.7975	3591.62		1663.96	652.055		1663.96	639.994		1664.01	634.684		1665.21	628.506		13.9055
																			13.8143	66.5592		13.8143	771.135		13.8143	1481.14		13.8143	2161.74		13.8143	2908.2		13.8143	3590.34		1664.81	651.164		1664.81	640.249		1664.87	634.911		1666.07	628.597		13.9225
																			13.8311	73.0378		13.8311	774.28		13.8311	1483.08		13.8311	2162.17		13.8311	2908.52		13.8311	3591.97		1665.67	650.527		1665.67	639.231		1665.73	634.593		1666.93	628.779		13.9395
																			13.8479	77.9675		13.8479	777.239		13.8479	1485.01		13.8479	2163.08		13.8479	2908.96		13.8479	3592.97		1666.52	652.055		1666.52	637.703		1666.58	633.956		1667.78	626.96		13.9565
																			13.8646	83.2781		13.8646	779.973		13.8646	1488.86		13.8646	2164.06		13.8646	2910.12		13.8646	3593.94		1667.38	652.691		1667.38	639.231		1667.44	634.229		1668.64	626.233		13.9734
																			13.8814	87.0012		13.8814	783.613		13.8814	1492.05		13.8814	2165.29		13.8814	2911.13		13.8814	3593.97		1668.24	651.036		1668.24	640.503		1668.3	632.684		1669.5	627.96		13.9904
																			13.8982	89.6864		13.8982	787.256		13.8982	1496.82		13.8982	2166.74		13.8982	2912.3		13.8982	3593.86		1669.09	651.8		1669.09	640.758		1669.15	632.82		1670.36	627.415		14.0074
																			13.9149	90.409		13.9149	793.658		13.9149	1502.52		13.9149	2169.14		13.9149	2914.61		13.9149	3596.38		1669.95	650.4		1669.95	640.249		1670.01	634.229		1671.21	626.688		14.0244
																			13.9317	88.5152		13.9317	797.938		13.9317	1507.86		13.9317	2171.06		13.9317	2916.15		13.9317	3598.58		1670.8	650.527		1670.8	639.485		1670.87	632.865		1672.07	627.779		14.0413
																			13.9485	85.3364		13.9485	803.918		13.9485	1514.65		13.9485	2173.69		13.9485	2918.99		13.9485	3602.93		1671.65	650.527		1671.65	638.976		1671.72	632.729		1672.93	626.869		14.0583
																			13.9653	80.4472		13.9653	808.669		13.9653	1518.66		13.9653	2176.09		13.9653	2921.43		13.9653	3604.91		1672.51	652.055		1672.51	636.431		1672.58	633.047		1673.78	627.96		14.0753
																			13.982	75.501		13.982	816.32		13.982	1521.79		13.982	2179.83		13.982	2924.44		13.982	3605.87		1673.36	651.418		1673.36	637.449		1673.43	632.684		1674.64	628.869		14.0922
																			13.9988	69.5759		13.9988	822.797		13.9988	1525.38		13.9988	2183.92		13.9988	2926.34		13.9988	3606.87		1674.22	649.764		1674.22	638.722		1674.29	632.82		1675.5	626.96		14.1092
																			14.0156	63.2022		14.0156	826.907		14.0156	1531.19		14.0156	2187.3		14.0156	2928.83		14.0156	3609.08		1675.07	651.546		1675.07	638.976		1675.14	632.229		1676.35	627.051		14.1262
																			14.0324	56.4524		14.0324	829.831		14.0324	1537.57		14.0324	2191.67		14.0324	2931.96		14.0324	3612.81		1675.93	648.746		1675.93	640.503		1676	632.184		1677.21	626.415		14.1432
																			14.0491	49.7867		14.0491	834.112		14.0491	1542.98		14.0491	2195.5		14.0491	2936.23		14.0491	3616.23		1676.78	650.527		1676.78	638.467		1676.86	631.956		1678.07	627.597		14.1601
																			14.0659	44.0169		14.0659	838.512		14.0659	1547.88		14.0659	2200.76		14.0659	2941.11		14.0659	3621.32		1677.64	649.764		1677.64	637.703		1677.71	631.775		1678.92	625.415		14.1771
																			14.0827	37.2476		14.0827	837.704		14.0827	1551.34		14.0827	2204.63		14.0827	2945.75		14.0827	3625.01		1678.49	649		1678.49	638.722		1678.57	632.775		1679.78	625.688		14.1941
																			14.0995	33.1589		14.0995	836.319		14.0995	1553.88		14.0995	2209.85		14.0995	2951.03		14.0995	3631.54		1679.34	649		1679.34	638.467		1679.42	631.638		1680.64	625.96		14.2111
																			14.1163	28.3448		14.1163	833.916		14.1163	1554.83		14.1163	2214.93		14.1163	2956.25		14.1163	3634.88		1680.2	648.873		1680.2	635.667		1680.28	631.547		1681.49	626.597		14.228
																			14.133	24.0094		14.133	833.583		14.133	1554.95		14.133	2219.7		14.133	2961.06		14.133	3640.78		1681.05	649		1681.05	635.922		1681.13	631.502		1682.35	626.688		14.245
																			14.1498	19.0411		14.1498	830.627		14.1498	1552.91		14.1498	2223.8		14.1498	2965.34		14.1498	3645.5		1681.9	648.746		1681.9	636.94		1681.99	631.956		1683.2	626.233		14.262
																			14.1666	15.7184		14.1666	826.172		14.1666	1549.95		14.1666	2226.78		14.1666	2969.69		14.1666	3651.93		1682.76	649.382		1682.76	636.94		1682.84	632.365		1684.06	626.233		14.2789
																			14.1833	13.755		14.1833	820.705		14.1833	1546.65		14.1833	2228.54		14.1833	2973.42		14.1833	3658.4		1683.61	648.236		1683.61	638.467		1683.69	631.365		1684.91	626.142		14.2959
																			14.2001	12.428		14.2001	815.143		14.2001	1542.52		14.2001	2228.32		14.2001	2976.58		14.2001	3663.46		1684.46	648.873		1684.46	635.922		1684.55	631.593		1685.77	626.142		14.3129
																			14.2169	11.049		14.2169	808.931		14.2169	1535.18		14.2169	2228.26		14.2169	2978.24		14.2169	3669.25		1685.32	649.509		1685.32	635.412		1685.4	631.547		1686.62	626.051		14.3299
																			14.2337	8.71868		14.2337	802.542		14.2337	1526.33		14.2337	2228.37		14.2337	2979.01		14.2337	3673.33		1686.17	649.127		1686.17	638.976		1686.26	630.956		1687.48	625.142		14.3468
																			14.2504	6.85966		14.2504	797.085		14.2504	1520.55		14.2504	2227.28		14.2504	2979.33		14.2504	3676.57		1687.02	648.618		1687.02	636.685		1687.11	630.684		1688.33	626.233		14.3638
																			14.2672	5.64237		14.2672	791.41		14.2672	1517.05		14.2672	2224.74		14.2672	2978.54		14.2672	3678.69		1687.88	647.982		1687.88	638.467		1687.97	630.547		1689.19	625.051		14.3808
																			14.284	5.30152		14.284	784.447		14.284	1513.89		14.284	2220.9		14.284	2976.8		14.284	3678.89		1688.73	648.618		1688.73	636.176		1688.82	629.775		1690.04	625.415		14.3978
																			14.3008	4.37751		14.3008	780.863		14.3008	1509.67		14.3008	2216.28		14.3008	2973.14		14.3008	3676.33		1689.58	646.964		1689.58	638.467		1689.67	630.593		1690.9	625.779		14.4147
																			14.3175	3.47943		14.3175	777.536		14.3175	1504.23		14.3175	2211.42		14.3175	2968.2		14.3175	3673.12		1690.43	647.473		1690.43	637.449		1690.53	631.047		1691.75	625.415		14.4317
																			14.3343	2.469		14.3343	774.226		14.3343	1497.31		14.3343	2206		14.3343	2963.6		14.3343	3669.58		1691.29	647.218		1691.29	635.158		1691.38	630.365		1692.61	624.324		14.4487
																			14.3511	2.17954		14.3511	768.421		14.3511	1489.13		14.3511	2199.62		14.3511	2957.37		14.3511	3664.23		1692.14	649.509		1692.14	635.158		1692.23	630.82		1693.46	625.051		14.4656
																			14.3679	2.38088		14.3679	765.562		14.3679	1484.44		14.3679	2195.22		14.3679	2952.51		14.3679	3658.77		1692.99	646.836		1692.99	636.431		1693.09	629.82		1694.32	625.324		14.4826
																			14.3846	2.53801		14.3846	762.585		14.3846	1478.95		14.3846	2189.91		14.3846	2947.03		14.3846	3651.72		1693.84	647.982		1693.84	635.922		1693.94	630.184		1695.17	626.051		14.4996
																			14.4014	2.27571		14.4014	760.854		14.4014	1475.76		14.4014	2185.42		14.4014	2941.61		14.4014	3646.18		1694.69	647.218		1694.69	634.394		1694.79	629.911		1696.03	624.779		14.5166
																			14.4182	1.68076		14.4182	757.872		14.4182	1471.38		14.4182	2180.21		14.4182	2935.82		14.4182	3639.13		1695.55	647.218		1695.55	635.158		1695.65	629.684		1696.88	625.415		14.5335
																			14.435	1.4138		14.435	756.434		14.435	1468.12		14.435	2176.24		14.435	2930.57		14.435	3631.99		1696.4	646.964		1696.4	635.667		1696.5	629.82		1697.73	625.051		14.5505
																			14.4517	1.48578		14.4517	754.242		14.4517	1467.79		14.4517	2173.03		14.4517	2926.48		14.4517	3624.78		1697.25	646.709		1697.25	635.922		1697.35	629.775		1698.59	625.415		14.5675
																			14.4685	1.59548		14.4685	752.535		14.4685	1466.35		14.4685	2170.02		14.4685	2923.37		14.4685	3619.32		1698.1	645.818		1698.1	635.922		1698.21	630.002		1699.44	624.869		14.5845
																			14.4853	1.22529		14.4853	751.143		14.4853	1465.15		14.4853	2167.55		14.4853	2920.67		14.4853	3614.57		1698.95	646.455		1698.95	637.194		1699.06	630.502		1700.3	623.142		14.6014
																			14.5021	1.5221		14.5021	751.275		14.5021	1462.78		14.5021	2165.15		14.5021	2917.19		14.5021	3610.51		1699.8	646.455		1699.8	635.412		1699.91	629.638		1701.15	625.233		14.6184
																			14.5188	1.38536		14.5188	750.236		14.5188	1461.33		14.5188	2163.1		14.5188	2914.07		14.5188	3605.76		1700.65	645.818		1700.65	635.158		1700.76	629.684		1702	623.96		14.6354
																			14.5356	1.53778		14.5356	749.217		14.5356	1460.58		14.5356	2161.28		14.5356	2911.93		14.5356	3601.79		1701.51	647.346		1701.51	634.649		1701.61	629.638		1702.86	624.051		14.6523
																			14.5524	0.50835		14.5524	748.001		14.5524	1459.18		14.5524	2159.98		14.5524	2910.58		14.5524	3597.78		1702.36	645.055		1702.36	634.649		1702.47	630.138		1703.71	624.597		14.6693
																			14.5692	0.0148		14.5692	747.188		14.5692	1458.39		14.5692	2158.9		14.5692	2909.86		14.5692	3596.69		1703.21	647.982		1703.21	634.903		1703.32	629.275		1704.56	625.233		14.6863
																			14.5859	-0.01962		14.5859	746.798		14.5859	1458.37		14.5859	2157.57		14.5859	2908.35		14.5859	3593.77		1704.06	645.564		1704.06	635.922		1704.17	629.502		1705.42	624.233		14.7033
																			14.6027	0.03419		14.6027	746.395		14.6027	1458.2		14.6027	2157.44		14.6027	2907.1		14.6027	3591.3		1704.91	646.073		1704.91	636.176		1705.02	629.002		1706.27	625.506		14.7202
																			14.6195	0.44509		14.6195	746.786		14.6195	1456.79		14.6195	2157.32		14.6195	2906		14.6195	3588.93		1705.76	644.291		1705.76	634.14		1705.87	629.184		1707.12	625.051		14.7372
																			14.6363	0.34944		14.6363	746.683		14.6363	1457.29		14.6363	2157.11		14.6363	2905.26		14.6363	3587.5		1706.61	645.691		1706.61	635.922		1706.73	628.911		1707.97	624.233		14.7542
																			14.653	0.16821		14.653	746.665		14.653	1456.79		14.653	2156.78		14.653	2904.68		14.653	3587.8		1707.46	645.182		1707.46	632.358		1707.58	628.138		1708.83	623.688		14.7712
																			14.6698	-0.20255		14.6698	746.173		14.6698	1457.11		14.6698	2157.06		14.6698	2904.12		14.6698	3587.71		1708.31	644.164		1708.31	632.867		1708.43	628.82		1709.68	623.415		14.7881
																			14.6866	-0.03028		14.6866	745.315		14.6866	1455.52		14.6866	2157.37		14.6866	2903.52		14.6866	3587.81		1709.16	644.164		1709.16	633.885		1709.28	628.229		1710.53	624.779		14.8051
																			14.7034	0.51297		14.7034	745.438		14.7034	1455.19		14.7034	2156.53		14.7034	2903.06		14.7034	3587.04		1710.01	644.546		1710.01	633.376		1710.13	628.593		1711.38	624.142		14.8221
																			14.7201	0.89111		14.7201	746.016		14.7201	1455.18		14.7201	2156.13		14.7201	2903.17		14.7201	3586.78		1710.86	644.164		1710.86	635.158		1710.98	629.047		1712.24	622.96		14.839
																			14.7369	0.45462		14.7369	746.171		14.7369	1455.74		14.7369	2155.98		14.7369	2903.29		14.7369	3586.19		1711.71	643.909		1711.71	633.885		1711.83	628.775		1713.09	624.415		14.856
																			14.7537	0.17305		14.7537	745.597		14.7537	1457.01		14.7537	2156.09		14.7537	2903.27		14.7537	3586.29		1712.56	644.8		1712.56	635.158		1712.69	628.502		1713.94	623.96		14.873
																			14.7705	0.33036		14.7705	744.794		14.7705	1457.62		14.7705	2156.14		14.7705	2902.79		14.7705	3587		1713.41	646.073		1713.41	633.885		1713.54	628.775		1714.79	623.506		14.89
																			14.7872	0.18471		14.7872	744.552		14.7872	1456.88		14.7872	2155.57		14.7872	2902.44		14.7872	3587.05		1714.26	645.436		1714.26	632.612		1714.39	628.502		1715.64	624.051		14.9069
																			14.804	0.38984		14.804	746.722		14.804	1455.81		14.804	2155.97		14.804	2903.32		14.804	3587.63		1715.11	645.309		1715.11	633.376		1715.24	628.411		1716.5	624.051		14.9239
																			14.8208	0.54944		14.8208	748.075		14.8208	1455.2		14.8208	2155.65		14.8208	2903.93		14.8208	3586.77		1715.96	645.946		1715.96	634.903		1716.09	628.002		1717.35	622.869		14.9409
																			14.8376	0.75954		14.8376	748.606		14.8376	1455.75		14.8376	2155.97		14.8376	2904.47		14.8376	3586.41		1716.81	645.436		1716.81	634.14		1716.94	627.729		1718.2	623.233		14.9579
																			14.8543	0.51864		14.8543	747.922		14.8543	1455.58		14.8543	2155.49		14.8543	2903.73		14.8543	3584.46		1717.66	644.291		1717.66	634.903		1717.79	628.32		1719.05	623.96		14.9748
																			14.8711	-0.02218		14.8711	748.491		14.8711	1455.75		14.8711	2156.03		14.8711	2903.9		14.8711	3584.4		1718.51	645.564		1718.51	633.376		1718.64	628.138		1719.9	623.688		14.9918
																			14.8879	-0.02491		14.8879	748.158		14.8879	1457		14.8879	2156.35		14.8879	2903.74		14.8879	3584.88		1719.35	644.546		1719.35	634.394		1719.49	628.093		1720.75	622.597		15.0088
																			14.9046	-0.33136		14.9046	748.346		14.9046	1457.8		14.9046	2156.29		14.9046	2904.13		14.9046	3584.84		1720.2	646.2		1720.2	633.885		1720.34	628.093		1721.6	622.869		15.0257
																			14.9214	-0.52169		14.9214	748.611		14.9214	1458.19		14.9214	2155.64		14.9214	2903.55		14.9214	3584.15		1721.05	645.182		1721.05	632.358		1721.19	627.956		1722.45	622.869		15.0427
																			14.9382	-0.23102		14.9382	748.455		14.9382	1458.68		14.9382	2155		14.9382	2903.14		14.9382	3584.42		1721.9	645.309		1721.9	633.376		1722.04	628.32		1723.3	622.506		15.0597
																			14.955	0.12558		14.955	746.754		14.955	1458.12		14.955	2155.32		14.955	2903.02		14.955	3585.66		1722.75	644.036		1722.75	634.649		1722.89	628.229		1724.16	622.233		15.0767
																			14.9717	0.65934		14.9717	746.051		14.9717	1457.89		14.9717	2156.22		14.9717	2903.19		14.9717	3586.68		1723.6	643.782		1723.6	631.849		1723.74	627.593		1725.01	621.869		15.0936
																			14.9885	0.48485		14.9885	745.307		14.9885	1457.15		14.9885	2156.36		14.9885	2902.79		14.9885	3587.45		1724.45	642.382		1724.45	632.867		1724.59	628.093		1725.86	623.324		15.1106
																			15.0053	0.65887		15.0053	745.398		15.0053	1456.07		15.0053	2156.5		15.0053	2902.08		15.0053	3586.24		1725.29	642.636		1725.29	632.103		1725.44	627.456		1726.71	623.051		15.1276
																			15.0221	0.47565		15.0221	745.198		15.0221	1454.58		15.0221	2156.1		15.0221	2901.65		15.0221	3585.23		1726.14	645.055		1726.14	632.358		1726.29	627.138		1727.56	622.506		15.1446
																			15.0388	0.79845		15.0388	745.78		15.0388	1454.51		15.0388	2155.6		15.0388	2902.12		15.0388	3583.43		1726.99	642.509		1726.99	631.849		1727.14	627.229		1728.41	622.233		15.1615
																			15.0556	0.92295		15.0556	747.112		15.0556	1456.48		15.0556	2155.54		15.0556	2902.88		15.0556	3582.78		1727.84	644.036		1727.84	632.612		1727.98	627.047		1729.26	622.597		15.1785
																			15.0724	1.05941		15.0724	747.347		15.0724	1457.8		15.0724	2155.75		15.0724	2903.48		15.0724	3582.65		1728.68	645.055		1728.68	633.122		1728.83	627.775		1730.11	623.142		15.1955
																			15.0892	0.85766		15.0892	747.95		15.0892	1457.27		15.0892	2155.77		15.0892	2903.22		15.0892	3583.55		1729.53	645.182		1729.53	632.103		1729.68	627.411		1730.96	622.324		15.2124
																			15.1059	0.62316		15.1059	747.95		15.1059	1457.02		15.1059	2155.27		15.1059	2903.01		15.1059	3583.86		1730.38	644.036		1730.38	632.867		1730.53	627.365		1731.81	622.506		15.2294
																			15.1227	0.59579		15.1227	747.512		15.1227	1457.16		15.1227	2155.14		15.1227	2902.64		15.1227	3584.78		1731.23	642.255		1731.23	632.358		1731.38	627.638		1732.66	622.233		15.2464
																			15.1395	0.81872		15.1395	747.151		15.1395	1457.59		15.1395	2154.82		15.1395	2902.49		15.1395	3584.66		1732.07	645.691		1732.07	634.649		1732.23	626.956		1733.51	622.688		15.2634
																			15.1563	0.87127		15.1563	747.423		15.1563	1459.25		15.1563	2155.31		15.1563	2903.13		15.1563	3585.53		1732.92	642.382		1732.92	633.631		1733.08	627.002		1734.36	622.506		15.2803
																			15.173	0.39256		15.173	746.747		15.173	1458.91		15.173	2155.53		15.173	2903.96		15.173	3585.98		1733.77	642.255		1733.77	631.849		1733.92	627.729		1735.21	623.142		15.2973
																			15.1898	0.0497		15.1898	746.859		15.1898	1459.75		15.1898	2156.59		15.1898	2904.42		15.1898	3585.99		1734.62	642.509		1734.62	632.103		1734.77	627.411		1736.05	621.688		15.3143
																			15.2066	-0.01432		15.2066	747.245		15.2066	1458.1		15.2066	2156.32		15.2066	2903.52		15.2066	3585.42		1735.46	643.273		1735.46	633.376		1735.62	626.456		1736.9	622.415		15.3313
																			15.2234	0.1703		15.2234	748.233		15.2234	1457.3		15.2234	2156.15		15.2234	2903.13		15.2234	3584.96		1736.31	644.546		1736.31	631.085		1736.47	627.729		1737.75	621.779		15.3482
																			15.2401	0.22282		15.2401	748.592		15.2401	1456.17		15.2401	2155.61		15.2401	2902.89		15.2401	3584.41		1737.16	644.418		1737.16	631.849		1737.32	627.684		1738.6	622.415		15.3652
																			15.2569	-0.0059		15.2569	748.652		15.2569	1458.11		15.2569	2155.82		15.2569	2902.79		15.2569	3583.96		1738	643.4		1738	631.085		1738.16	626.865		1739.45	621.869		15.3822
																			15.2737	0.59154		15.2737	747.975		15.2737	1460		15.2737	2156.09		15.2737	2902.93		15.2737	3584.49		1738.85	644.036		1738.85	631.849		1739.01	627.593		1740.3	621.869		15.3992
																			15.2904	0.916		15.2904	746.697		15.2904	1460.08		15.2904	2156.25		15.2904	2903.07		15.2904	3585.46		1739.7	642.382		1739.7	632.103		1739.86	626.82		1741.15	620.779		15.4161
																			15.3072	1.29852		15.3072	747.155		15.3072	1459.24		15.3072	2156.73		15.3072	2903.95		15.3072	3585.64		1740.54	644.036		1740.54	632.867		1740.71	626.365		1742	621.869		15.4331
																			15.324	0.91399		15.324	747.299		15.324	1457.73		15.324	2156.84		15.324	2903.37		15.324	3585.31		1741.39	643.146		1741.39	633.631		1741.56	626.593		1742.85	622.415		15.4501
																			15.3408	0.94685		15.3408	747.858		15.3408	1456.84		15.3408	2156.7		15.3408	2903.11		15.3408	3585.33		1742.23	643.909		1742.23	630.067		1742.4	626.638		1743.69	622.779		15.467
																			15.3575	1.43867		15.3575	747.412		15.3575	1457.79		15.3575	2156.29		15.3575	2902.87		15.3575	3586.14		1743.08	641.618		1743.08	630.576		1743.25	627.093		1744.54	621.869		15.484
																			15.3743	2.06023		15.3743	747.292		15.3743	1458.97		15.3743	2156.32		15.3743	2903.22		15.3743	3585.03		1743.93	642		1743.93	632.612		1744.1	626.365		1745.39	621.869		15.501
																			15.3911	1.92005		15.3911	747.13		15.3911	1460.11		15.3911	2156.9		15.3911	2903.47		15.3911	3585.56		1744.77	642.255		1744.77	631.594		1744.94	626.593		1746.24	621.869		15.518
																			15.4079	1.32068		15.4079	747.421		15.4079	1458.43		15.4079	2156.91		15.4079	2903.78		15.4079	3585.79		1745.62	641.491		1745.62	630.322		1745.79	627.456		1747.09	621.597		15.5349
																			15.4246	0.45189		15.4246	747.548		15.4246	1456.57		15.4246	2156.92		15.4246	2903.4		15.4246	3586.41		1746.46	642.255		1746.46	632.358		1746.64	626.32		1747.93	621.506		15.5519
																			15.4414	0.27804		15.4414	746.876		15.4414	1455.5		15.4414	2156.54		15.4414	2903.31		15.4414	3586.36		1747.31	640.982		1747.31	631.594		1747.48	626.638		1748.78	621.779		15.5689
																			15.4582	0.59567		15.4582	747.034		15.4582	1455.43		15.4582	2156.2		15.4582	2903.24		15.4582	3585.94		1748.15	642.764		1748.15	632.103		1748.33	626.638		1749.63	621.142		15.5859
																			15.475	0.78207		15.475	746.965		15.475	1457.7		15.475	2156.33		15.475	2903.08		15.475	3586.08		1749	641.618		1749	632.358		1749.18	627.184		1750.48	621.415		15.6028
																			15.4917	0.79976		15.4917	747.393		15.4917	1458.04		15.4917	2156.11		15.4917	2903.1		15.4917	3585.05		1749.84	644.036		1749.84	630.831		1750.02	626.275		1751.32	621.324		15.6198
																			15.5085	0.56176		15.5085	746.72		15.5085	1459.1		15.5085	2156.34		15.5085	2902.99		15.5085	3585.43		1750.69	641.746		1750.69	631.849		1750.87	626.093		1752.17	620.415		15.6368
																			15.5253	0.37278		15.5253	746.004		15.5253	1459.84		15.5253	2155.99		15.5253	2902.71		15.5253	3585.96		1751.53	642.764		1751.53	630.576		1751.72	625.956		1753.02	621.142		15.6537
																			15.5421	0.52509		15.5421	746.008		15.5421	1459.55		15.5421	2155.61		15.5421	2902.87		15.5421	3586.62		1752.38	641.746		1752.38	630.322		1752.56	626.229		1753.87	620.597		15.6707
																			15.5588	0.91732		15.5588	746.258		15.5588	1459.74		15.5588	2155.77		15.5588	2903.02		15.5588	3586.7		1753.22	642.382		1753.22	630.576		1753.41	626.002		1754.71	621.415		15.6877
																			15.5756	0.85686		15.5756	746.711		15.5756	1459.68		15.5756	2156.05		15.5756	2903.25		15.5756	3586.37		1754.07	641.618		1754.07	631.849		1754.25	626.456		1755.56	621.051		15.7047
																			15.5924	-0.24255		15.5924	746.272		15.5924	1459.81		15.5924	2156.33		15.5924	2903.17		15.5924	3586.08		1754.91	643.527		1754.91	629.049		1755.1	625.82		1756.41	621.051		15.7216
																			15.6092	-0.4388		15.6092	746.067		15.6092	1459.04		15.6092	2156.31		15.6092	2903.52		15.6092	3585.49		1755.76	642.255		1755.76	629.049		1755.94	626.502		1757.25	621.051		15.7386
																			15.6259	-0.22264		15.6259	745.697		15.6259	1458.35		15.6259	2156.38		15.6259	2903.36		15.6259	3585.15		1756.6	641.746		1756.6	631.085		1756.79	626.32		1758.1	621.142		15.7556
																			15.6427	0.89219		15.6427	745.872		15.6427	1458.02		15.6427	2156.66		15.6427	2902.61		15.6427	3584.53		1757.45	642.255		1757.45	630.067		1757.64	625.911		1758.95	621.597		15.7726
																			15.6595	1.46211		15.6595	746.147		15.6595	1459.11		15.6595	2156.67		15.6595	2902.39		15.6595	3585.39		1758.29	641.109		1758.29	632.612		1758.48	626.184		1759.79	621.142		15.7895
																			15.6763	1.8794		15.6763	746.918		15.6763	1459.47		15.6763	2156.65		15.6763	2902.99		15.6763	3585.38		1759.13	641.618		1759.13	629.303		1759.33	625.638		1760.64	620.869		15.8065
																			15.693	1.28615		15.693	746.678		15.693	1459.92		15.693	2156.6		15.693	2903.56		15.693	3585.5		1759.98	640.855		1759.98	630.067		1760.17	626.638		1761.49	620.597		15.8235
																			15.7098	0.87166		15.7098	746.16		15.7098	1458.65		15.7098	2156.26		15.7098	2903.5		15.7098	3585.93		1760.82	642		1760.82	629.558		1761.02	626.047		1762.33	621.597		15.8404
																			15.7266	0.85915		15.7266	746.456		15.7266	1458.01		15.7266	2155.94		15.7266	2903.46		15.7266	3587.18		1761.67	644.036		1761.67	629.558		1761.86	625.047		1763.18	621.96		15.8574
																			15.7434	0.89563		15.7434	746.354		15.7434	1456.02		15.7434	2155.23		15.7434	2903.61		15.7434	3587.18		1762.51	640.982		1762.51	630.576		1762.71	626.093		1764.02	621.779		15.8744
																			15.7601	1.72903		15.7601	746.365		15.7601	1455.81		15.7601	2155.13		15.7601	2903.61		15.7601	3586.42		1763.35	641.618		1763.35	631.085		1763.55	625.956		1764.87	620.96		15.8914
																			15.7769	1.65889		15.7769	746.273		15.7769	1456.43		15.7769	2155.25		15.7769	2903.7		15.7769	3585.58		1764.2	640.982		1764.2	629.303		1764.4	626.002		1765.71	621.506		15.9083
																			15.7937	1.18448		15.7937	745.516		15.7937	1457.43		15.7937	2155.51		15.7937	2903.56		15.7937	3584.78		1765.04	641.364		1765.04	632.358		1765.24	626.093		1766.56	620.96		15.9253
																			15.8105	1.30858		15.8105	745.413		15.8105	1457.34		15.8105	2155.97		15.8105	2903.93		15.8105	3584.27		1765.88	641.873		1765.88	630.576		1766.08	625.775		1767.41	620.779		15.9423
																			15.8272	1.60964		15.8272	745.382		15.8272	1458.27		15.8272	2156.39		15.8272	2903.57		15.8272	3583.96		1766.73	641.618		1766.73	629.049		1766.93	625.638		1768.25	620.506		15.9593
																			15.844	2.25379		15.844	746.367		15.844	1458.11		15.844	2156.75		15.844	2904.09		15.844	3585.23		1767.57	641.618		1767.57	628.54		1767.77	626.093		1769.1	620.779		15.9762
																			15.8608	2.51959		15.8608	746.335		15.8608	1458.64		15.8608	2157.14		15.8608	2903.58		15.8608	3585.78		1768.41	641.746		1768.41	631.594		1768.62	625.684		1769.94	620.96		15.9932
																			15.8776	3.61553		15.8776	746.087		15.8776	1459.37		15.8776	2156.87		15.8776	2903.27		15.8776	3586		1769.25	640.6		1769.25	631.849		1769.46	625.911		1770.79	619.779		16.0102
																			15.8943	4.11869		15.8943	746.147		15.8943	1460.15		15.8943	2156.32		15.8943	2903.15		15.8943	3585.08		1770.1	641.491		1770.1	631.085		1770.3	625.775		1771.63	620.779		16.0271
																			15.9111	5.02721		15.9111	746.435		15.9111	1459.11		15.9111	2155.74		15.9111	2903.14		15.9111	3584.53		1770.94	639.709		1770.94	630.067		1771.15	625.684		1772.48	620.506		16.0441
																			15.9279	5.85534		15.9279	746.951		15.9279	1457.73		15.9279	2155.35		15.9279	2903.07		15.9279	3583.75		1771.78	640.6		1771.78	632.612		1771.99	625.32		1773.32	620.142		16.0611
																			15.9447	6.9149		15.9447	747.152		15.9447	1455.34		15.9447	2155.79		15.9447	2902.15		15.9447	3584.03		1772.62	639.964		1772.62	630.067		1772.84	625.865		1774.17	620.869		16.0781
																			15.9614	7.33756		15.9614	748.696		15.9614	1456.75		15.9614	2156.52		15.9614	2902.26		15.9614	3583.91		1773.47	640.855		1773.47	630.576		1773.68	625.547		1775.01	619.869		16.095
																			15.9782	8.06208		15.9782	748.678		15.9782	1459.24		15.9782	2157.16		15.9782	2902.84		15.9782	3584.33		1774.31	640.727		1774.31	630.322		1774.52	625.502		1775.85	620.142		16.112
																			15.995	8.71747		15.995	748.782		15.995	1461.41		15.995	2156.49		15.995	2902.93		15.995	3584.13		1775.15	641.618		1775.15	629.812		1775.37	625.638		1776.7	621.324		16.129
																			16.0117	9.78852		16.0117	749.694		16.0117	1460.14		16.0117	2155.91		16.0117	2902.86		16.0117	3584.48		1775.99	640.727		1775.99	632.103		1776.21	625.729		1777.54	620.597		16.1459
																			16.0285	10.4493		16.0285	751.04		16.0285	1459.8		16.0285	2155.85		16.0285	2902.94		16.0285	3584.16		1776.83	641.236		1776.83	630.322		1777.05	625.456		1778.39	620.597		16.1629
																			16.0453	11.4446		16.0453	750.718		16.0453	1458.93		16.0453	2157.03		16.0453	2902.72		16.0453	3583.92		1777.68	641.109		1777.68	631.085		1777.89	624.956		1779.23	620.324		16.1799
																			16.0621	12.9915		16.0621	749.941		16.0621	1460.89		16.0621	2157.53		16.0621	2902.94		16.0621	3583.55		1778.52	642.255		1778.52	630.067		1778.74	625.365		1780.07	620.142		16.1969
																			16.0788	14.828		16.0788	750.849		16.0788	1461.68		16.0788	2157.73		16.0788	2903		16.0788	3585.11		1779.36	641.873		1779.36	628.285		1779.58	625.275		1780.92	620.688		16.2138
																			16.0956	17.4001		16.0956	752.289		16.0956	1463.05		16.0956	2157.52		16.0956	2903.85		16.0956	3585.82		1780.2	638.691		1780.2	629.303		1780.42	625.184		1781.76	620.779		16.2308
																			16.1124	18.9593		16.1124	752.451		16.1124	1462.62		16.1124	2158.08		16.1124	2904		16.1124	3585.19		1781.04	639.327		1781.04	629.812		1781.27	625.32		1782.61	620.324		16.2478
																			16.1292	20.9143		16.1292	752.542		16.1292	1462.34		16.1292	2157.61		16.1292	2904.22		16.1292	3583.84		1781.88	642		1781.88	630.322		1782.11	625.82		1783.45	619.415		16.2648
																			16.1459	22.4658		16.1459	753.535		16.1459	1463.56		16.1459	2157.6		16.1459	2904.2		16.1459	3584.14		1782.72	640.091		1782.72	629.558		1782.95	626.411		1784.29	620.142		16.2817
																			16.1627	24.7416		16.1627	755.35		16.1627	1466.23		16.1627	2157.58		16.1627	2904.66		16.1627	3585.64		1783.56	640.346		1783.56	630.322		1783.79	625.502		1785.14	619.688		16.2987
																			16.1795	26.2106		16.1795	755.615		16.1795	1467.76		16.1795	2158.06		16.1795	2905.3		16.1795	3585.99		1784.41	638.691		1784.41	630.831		1784.63	625.684		1785.98	620.142		16.3157
																			16.1963	27.8607		16.1963	756.224		16.1963	1465.96		16.1963	2158.55		16.1963	2905.31		16.1963	3586.7		1785.25	640.091		1785.25	628.031		1785.48	624.956		1786.82	619.779		16.3327
																			16.213	29.0922		16.213	757.478		16.213	1465.84		16.213	2159.21		16.213	2905.17		16.213	3587.42		1786.09	639.582		1786.09	630.067		1786.32	624.911		1787.67	620.142		16.3496
																			16.2298	30.1986		16.2298	758.957		16.2298	1466.9		16.2298	2160.05		16.2298	2905.35		16.2298	3588.76		1786.93	638.946		1786.93	629.558		1787.16	625.502		1788.51	620.506		16.3666
																			16.2466	29.8351		16.2466	760.236		16.2466	1467.24		16.2466	2160.68		16.2466	2906.49		16.2466	3587.81		1787.77	640.218		1787.77	629.049		1788	625.229		1789.35	619.415		16.3836
																			16.2634	30.206		16.2634	761.543		16.2634	1468.26		16.2634	2161.39		16.2634	2907.73		16.2634	3587		1788.61	639.327		1788.61	629.049		1788.84	624.82		1790.19	619.597		16.4005
																			16.2801	30.202		16.2801	762.568		16.2801	1469.07		16.2801	2162.36		16.2801	2908.36		16.2801	3587.19		1789.45	639.455		1789.45	630.576		1789.69	625.411		1791.04	618.779		16.4175
																			16.2969	30.4444		16.2969	763.186		16.2969	1471.47		16.2969	2164.17		16.2969	2908.56		16.2969	3588.56		1790.29	638.946		1790.29	631.594		1790.53	625.411		1791.88	619.506		16.4345
																			16.3137	29.5652		16.3137	765.654		16.3137	1473.47		16.3137	2164.52		16.3137	2909.1		16.3137	3590.33		1791.13	639.073		1791.13	629.558		1791.37	625.411		1792.72	620.597		16.4515
																			16.3305	27.9137		16.3305	767.502		16.3305	1474.99		16.3305	2165.08		16.3305	2909.61		16.3305	3590.53		1791.97	639.073		1791.97	629.558		1792.21	625.547		1793.56	620.324		16.4684
																			16.3472	25.8237		16.3472	770.116		16.3472	1477.62		16.3472	2166.34		16.3472	2910.82		16.3472	3591.21		1792.81	639.836		1792.81	630.067		1793.05	625.502		1794.41	619.688		16.4854
																			16.364	23.6736		16.364	770.347		16.364	1479.84		16.364	2168.21		16.364	2912.04		16.364	3592.15		1793.65	640.6		1793.65	631.34		1793.89	624.002		1795.25	619.415		16.5024
																			16.3808	21.7646		16.3808	771.706		16.3808	1481.12		16.3808	2169.77		16.3808	2913.24		16.3808	3593.44		1794.49	638.946		1794.49	628.031		1794.73	624.365		1796.09	619.779		16.5193
																			16.3976	19.3458		16.3976	772.865		16.3976	1480.52		16.3976	2170.63		16.3976	2914.34		16.3976	3595.08		1795.33	638.309		1795.33	628.794		1795.57	624.456		1796.93	620.051		16.5363
																			16.4143	17.8267		16.4143	774.275		16.4143	1481.79		16.4143	2171.79		16.4143	2915.86		16.4143	3596.25		1796.17	640.218		1796.17	630.067		1796.41	624.593		1797.77	621.142		16.5533
																			16.4311	15.9146		16.4311	773.884		16.4311	1483.75		16.4311	2173.67		16.4311	2916.96		16.4311	3597.52		1797.01	640.346		1797.01	628.285		1797.25	624.411		1798.61	620.324		16.5703
																			16.4479	14.0544		16.4479	773.266		16.4479	1484.43		16.4479	2175.72		16.4479	2918		16.4479	3598.95		1797.85	640.727		1797.85	631.34		1798.09	625.002		1799.46	618.779		16.5872
																			16.4647	11.525		16.4647	773.612		16.4647	1484.55		16.4647	2177.58		16.4647	2918.16		16.4647	3600.61		1798.68	640.982		1798.68	631.085		1798.93	624.138		1800.3	620.415		16.6042
																			16.4814	9.57325		16.4814	774.646		16.4814	1485.05		16.4814	2178.89		16.4814	2919.18		16.4814	3601.69		1799.52	641.364		1799.52	631.34		1799.78	624.593		1801.14	620.324		16.6212
																			16.4982	8.10439		16.4982	774.375		16.4982	1484.88		16.4982	2179.81		16.4982	2920.71		16.4982	3601.75		1800.36	639.582		1800.36	631.34		1800.62	625.093		1801.98	619.142		16.6382
																			16.515	6.92364		16.515	772.059		16.515	1483.64		16.515	2180.86		16.515	2922.77		16.515	3602.84		1801.2	640.473		1801.2	630.831		1801.46	624.684		1802.82	620.415		16.6551
																			16.5318	6.04606		16.5318	769.955		16.5318	1480.82		16.5318	2181.93		16.5318	2924.54		16.5318	3604.65		1802.04	640.473		1802.04	630.322		1802.3	624.002		1803.66	619.142		16.6721
																			16.5485	5.21447		16.5485	768.633		16.5485	1480.14		16.5485	2182.73		16.5485	2924.68		16.5485	3606.56		1802.88	638.691		1802.88	630.576		1803.14	624.593		1804.5	619.597		16.6891
																			16.5653	4.27939		16.5653	768.312		16.5653	1480.41		16.5653	2183.16		16.5653	2924.98		16.5653	3607.48		1803.72	639.327		1803.72	627.267		1803.97	624.82		1805.34	619.688		16.7061
																			16.5821	3.26069		16.5821	767.064		16.5821	1480.78		16.5821	2182.72		16.5821	2925.56		16.5821	3608.4		1804.56	639.582		1804.56	630.067		1804.81	624.365		1806.18	620.051		16.723
																			16.5989	2.97576		16.5989	765.29		16.5989	1480.61		16.5989	2182.64		16.5989	2926.6		16.5989	3609.34		1805.39	640.982		1805.39	628.285		1805.65	625.138		1807.03	619.142		16.74
																			16.6156	3.06426		16.6156	762.965		16.6156	1480.76		16.6156	2182.71		16.6156	2926.48		16.6156	3610.58		1806.23	639.327		1806.23	630.322		1806.49	625.275		1807.87	619.415		16.757
																			16.6324	3.07443		16.6324	760.508		16.6324	1480.06		16.6324	2182.22		16.6324	2926.12		16.6324	3611.69		1807.07	640.346		1807.07	630.576		1807.33	624.956		1808.71	619.324		16.7739
																			16.6492	2.7561		16.6492	758.432		16.6492	1478.89		16.6492	2181.32		16.6492	2926.01		16.6492	3612.15		1807.91	639.964		1807.91	627.776		1808.17	624.684		1809.55	618.688		16.7909
																			16.6659	2.04918		16.6659	756.875		16.6659	1476.38		16.6659	2179.79		16.6659	2925.54		16.6659	3613.12		1808.75	639.073		1808.75	629.303		1809.01	623.956		1810.39	619.597		16.8079
																			16.6827	1.53973		16.6827	755.876		16.6827	1474.1		16.6827	2178.76		16.6827	2925.04		16.6827	3612.58		1809.58	638.564		1809.58	628.031		1809.85	624.547		1811.23	618.506		16.8249
																			16.6995	1.10311		16.6995	755.486		16.6995	1471		16.6995	2177.56		16.6995	2923.86		16.6995	3611.81		1810.42	639.073		1810.42	628.794		1810.69	625.411		1812.07	619.869		16.8418
																			16.7163	1.70281		16.7163	754.82		16.7163	1470.58		16.7163	2176.38		16.7163	2922.78		16.7163	3611.84		1811.26	638.309		1811.26	628.54		1811.53	624.32		1812.91	619.233		16.8588
																			16.733	1.71527		16.733	754.182		16.733	1469		16.733	2174.27		16.733	2921.73		16.733	3609.92		1812.1	637.8		1812.1	628.285		1812.37	624.684		1813.75	619.233		16.8758
																			16.7498	2.58067		16.7498	754.191		16.7498	1467.11		16.7498	2172.56		16.7498	2920.41		16.7498	3608.62		1812.93	637.546		1812.93	629.812		1813.21	625.093		1814.59	619.051		16.8927
																			16.7666	2.50211		16.7666	753.052		16.7666	1463.34		16.7666	2170.91		16.7666	2919.09		16.7666	3607.17		1813.77	637.418		1813.77	629.049		1814.04	624.456		1815.43	619.051		16.9097
																			16.7834	3.22549		16.7834	751.445		16.7834	1461.79		16.7834	2169.66		16.7834	2917.5		16.7834	3606.01		1814.61	637.418		1814.61	628.031		1814.88	624.593		1816.26	618.779		16.9267
																			16.8001	3.2937		16.8001	750.254		16.8001	1461.21		16.8001	2168.17		16.8001	2915.79		16.8001	3604.21		1815.45	638.055		1815.45	628.285		1815.72	625.138		1817.1	619.415		16.9437
																			16.8169	2.95476		16.8169	749.926		16.8169	1460.23		16.8169	2166.08		16.8169	2913.82		16.8169	3602.68		1816.28	637.546		1816.28	631.594		1816.56	624.593		1817.94	619.142		16.9606
																			16.8337	3.10594		16.8337	749.714		16.8337	1458.49		16.8337	2164.46		16.8337	2912.11		16.8337	3601.92		1817.12	637.418		1817.12	629.303		1817.4	625.093		1818.78	619.597		16.9776
																			16.8505	3.8313		16.8505	749.074		16.8505	1458.47		16.8505	2163.7		16.8505	2911.16		16.8505	3600.67		1817.96	636.273		1817.96	628.794		1818.23	624.275		1819.62	620.233		16.9946
																			16.8672	5.16292		16.8672	748.773		16.8672	1458.84		16.8672	2162.62		16.8672	2909.72		16.8672	3598.49		1818.79	637.8		1818.79	628.285		1819.07	624.138		1820.46	619.688		17.0116
																			16.884	6.85665		16.884	748.52		16.884	1459.17		16.884	2161.3		16.884	2909.12		16.884	3596.45		1819.63	637.673		1819.63	628.031		1819.91	624.729		1821.3	619.869		17.0285
																			16.9008	8.50208		16.9008	747.618		16.9008	1458.54		16.9008	2160.06		16.9008	2908.23		16.9008	3594.6		1820.47	638.182		1820.47	628.031		1820.75	624.365		1822.14	619.869		17.0455
																			16.9176	9.97791		16.9176	747.988		16.9176	1458.54		16.9176	2159.11		16.9176	2907.7		16.9176	3593.38		1821.3	637.546		1821.3	629.303		1821.59	624.184		1822.98	619.96		17.0625
																			16.9343	11.6622		16.9343	748.001		16.9343	1458.37		16.9343	2158.42		16.9343	2906.81		16.9343	3592.37		1822.14	638.182		1822.14	628.54		1822.42	624.456		1823.82	619.233		17.0795
																			16.9511	12.5814		16.9511	748.225		16.9511	1458.08		16.9511	2157.3		16.9511	2905.85		16.9511	3590.6		1822.97	636.782		1822.97	629.558		1823.26	624.002		1824.65	619.779		17.0964
																			16.9679	13.6718		16.9679	748.248		16.9679	1457.06		16.9679	2156.87		16.9679	2905.04		16.9679	3588.61		1823.81	638.309		1823.81	631.085		1824.1	624.002		1825.49	619.324		17.1134
																			16.9847	14.4955		16.9847	748.948		16.9847	1456.44		16.9847	2156.86		16.9847	2905.11		16.9847	3588.01		1824.65	637.418		1824.65	629.303		1824.94	624.047		1826.33	620.233		17.1304
																			17.0014	15.5579		17.0014	749.535		17.0014	1457.48		17.0014	2157.46		17.0014	2905.46		17.0014	3588.94		1825.48	637.164		1825.48	628.031		1825.77	624.456		1827.17	619.597		17.1473
																			17.0182	16.3001		17.0182	750.171		17.0182	1458.04		17.0182	2157.73		17.0182	2905.08		17.0182	3589.19		1826.32	637.036		1826.32	630.576		1826.61	624.093		1828.01	619.869		17.1643
																			17.035	16.5012		17.035	750.221		17.035	1458.82		17.035	2157.56		17.035	2904.97		17.035	3588.06		1827.15	637.927		1827.15	626.758		1827.45	623.684		1828.84	620.142		17.1813
																			17.0518	16.3093		17.0518	749.949		17.0518	1461.72		17.0518	2157.17		17.0518	2904.87		17.0518	3586.32		1827.99	637.291		1827.99	629.303		1828.28	624.593		1829.68	619.324		17.1983
																			17.0685	14.8402		17.0685	750.35		17.0685	1463.44		17.0685	2157.13		17.0685	2904.79		17.0685	3585.64		1828.83	639.964		1828.83	628.285		1829.12	623.911		1830.52	619.96		17.2152
																			17.0853	12.5469		17.0853	751.608		17.0853	1464.27		17.0853	2157.24		17.0853	2904.6		17.0853	3585.74		1829.66	637.673		1829.66	628.794		1829.96	623.547		1831.36	618.869		17.2322
																			17.1021	10.4898		17.1021	752.735		17.1021	1462.46		17.1021	2157.48		17.1021	2904.48		17.1021	3585.98		1830.5	637.8		1830.5	627.776		1830.79	624.365		1832.2	618.96		17.2492
																			17.1189	9.19753		17.1189	753.024		17.1189	1462.7		17.1189	2157.47		17.1189	2903.81		17.1189	3586.21		1831.33	638.055		1831.33	629.049		1831.63	624.411		1833.03	618.96		17.2662
																			17.1356	7.75621		17.1356	752.443		17.1356	1463.11		17.1356	2157.74		17.1356	2903.4		17.1356	3584.98		1832.17	637.927		1832.17	629.303		1832.47	623.729		1833.87	618.779		17.2831
																			17.1524	6.07424		17.1524	753.187		17.1524	1464.41		17.1524	2158.35		17.1524	2903.63		17.1524	3585.9		1833	637.546		1833	628.794		1833.3	623.865		1834.71	618.324		17.3001
																			17.1692	4.3459		17.1692	754.191		17.1692	1462.91		17.1692	2159.1		17.1692	2904.04		17.1692	3585.71		1833.84	639.2		1833.84	628.794		1834.14	624.593		1835.54	618.142		17.3171
																			17.186	3.55208		17.186	756.049		17.186	1464.4		17.186	2160.2		17.186	2904.6		17.186	3586.42		1834.67	638.691		1834.67	628.031		1834.97	623.729		1836.38	617.051		17.3341
																			17.2027	3.34321		17.2027	757.969		17.2027	1464.24		17.2027	2161.28		17.2027	2905.09		17.2027	3587.08		1835.5	638.564		1835.5	628.285		1835.81	624.184		1837.22	618.597		17.351
																			17.2195	2.37974		17.2195	758.36		17.2195	1464.35		17.2195	2161.55		17.2195	2905.6		17.2195	3587.29		1836.34	639.073		1836.34	629.812		1836.64	624.502		1838.06	618.869		17.368
																			17.2363	1.48969		17.2363	758.95		17.2363	1465.29		17.2363	2161.98		17.2363	2905.97		17.2363	3587.61		1837.17	637.673		1837.17	630.576		1837.48	623.82		1838.89	618.688		17.385
																			17.2531	0.8001		17.2531	759.611		17.2531	1465.56		17.2531	2163.02		17.2531	2906.39		17.2531	3588.6		1838.01	637.418		1838.01	630.322		1838.32	624.456		1839.73	618.506		17.4019
																			17.2698	0.30291		17.2698	760.032		17.2698	1463.96		17.2698	2164.93		17.2698	2906.67		17.2698	3589.03		1838.84	637.036		1838.84	627.776		1839.15	623.456		1840.57	617.96		17.4189
																			17.2866	0.2848		17.2866	758.771		17.2866	1463.31		17.2866	2167.01		17.2866	2907.61		17.2866	3588.3		1839.68	637.673		1839.68	628.54		1839.99	624.775		1841.4	618.96		17.4359
																			17.3034	0.36858		17.3034	756.74		17.3034	1464.85		17.3034	2168.51		17.3034	2909.19		17.3034	3587.42		1840.51	638.309		1840.51	628.285		1840.82	624.32		1842.24	618.688		17.4529
																			17.3202	0.82568		17.3202	755.573		17.3202	1465.75		17.3202	2169.96		17.3202	2910.56		17.3202	3586.88		1841.34	637.418		1841.34	629.558		1841.66	624.729		1843.07	618.597		17.4698
																			17.3369	1.49608		17.3369	755.108		17.3369	1465.79		17.3369	2170.91		17.3369	2911.41		17.3369	3587.42		1842.18	638.055		1842.18	629.303		1842.49	623.684		1843.91	618.506		17.4868
																			17.3537	1.22455		17.3537	753.702		17.3537	1464.2		17.3537	2170.51		17.3537	2911.53		17.3537	3587.64		1843.01	636.782		1843.01	629.558		1843.33	624.411		1844.75	617.869		17.5038
																			17.3705	1.19493		17.3705	751.986		17.3705	1463.46		17.3705	2169.92		17.3705	2912.08		17.3705	3589.04		1843.85	637.673		1843.85	629.812		1844.16	623.684		1845.58	619.142		17.5207
																			17.3873	0.61873		17.3873	751.108		17.3873	1461.94		17.3873	2169		17.3873	2911.73		17.3873	3590.38		1844.68	637.291		1844.68	630.576		1845	624.184		1846.42	619.233		17.5377
																			17.404	0.3791		17.404	751.406		17.404	1461.24		17.404	2168.77		17.404	2911.54		17.404	3591.48		1845.51	636.527		1845.51	629.049		1845.83	623.365		1847.25	618.597		17.5547
																			17.4208	-0.24442		17.4208	750.275		17.4208	1459.82		17.4208	2168.02		17.4208	2911.26		17.4208	3591.13		1846.35	636.655		1846.35	626.503		1846.67	624.456		1848.09	619.96		17.5717
																			17.4376	0.12522		17.4376	748.923		17.4376	1459.57		17.4376	2166.2		17.4376	2910.78		17.4376	3591.51		1847.18	636.527		1847.18	627.776		1847.5	623.729		1848.92	619.415		17.5886
																			17.4544	0.37595		17.4544	748.522		17.4544	1458.71		17.4544	2164.72		17.4544	2910.61		17.4544	3592.87		1848.01	637.418		1848.01	627.012		1848.33	624.502		1849.76	618.96		17.6056
																			17.4711	0.77827		17.4711	748.249		17.4711	1457.86		17.4711	2164.18		17.4711	2909.77		17.4711	3594.13		1848.84	637.546		1848.84	628.285		1849.17	624.32		1850.6	618.415		17.6226
																			17.4879	0.48308		17.4879	747.77		17.4879	1457.55		17.4879	2163.36		17.4879	2909		17.4879	3593.79		1849.68	636.146		1849.68	629.812		1850	623.865		1851.43	619.142		17.6396
																			17.5047	0.31119		17.5047	747.305		17.5047	1457.75		17.5047	2161.91		17.5047	2907.68		17.5047	3592.78		1850.51	636.909		1850.51	626.758		1850.84	624.456		1852.27	618.688		17.6565
																			17.5215	-0.27963		17.5215	747.975		17.5215	1456.5		17.5215	2160.39		17.5215	2906.57		17.5215	3591.97		1851.34	635.764		1851.34	628.794		1851.67	623.82		1853.1	618.96		17.6735
																			17.5382	0.40448		17.5382	748.02		17.5382	1456.51		17.5382	2160.09		17.5382	2905.77		17.5382	3591.53		1852.18	638.182		1852.18	628.031		1852.5	624.093		1853.94	618.597		17.6905
																			17.555	0.776		17.555	746.172		17.555	1456.47		17.555	2159.34		17.555	2905.19		17.555	3590.94		1853.01	637.036		1853.01	628.54		1853.34	624.138		1854.77	618.869		17.7075
																			17.5718	1.15889		17.5718	745.221		17.5718	1457.63		17.5718	2158.7		17.5718	2904.84		17.5718	3589.59		1853.84	636.782		1853.84	630.322		1854.17	623.638		1855.6	618.96		17.7244
																			17.5886	1.09928		17.5886	745.276		17.5886	1457.79		17.5886	2157.73		17.5886	2904.6		17.5886	3589.23		1854.67	635.764		1854.67	627.267		1855.01	623.729		1856.44	618.779		17.7414
																			17.6053	1.27111		17.6053	746.336		17.6053	1457.73		17.6053	2157.27		17.6053	2904.5		17.6053	3588.75		1855.5	636.527		1855.5	626.758		1855.84	624.275		1857.27	618.96		17.7584
																			17.6221	1.2888		17.6221	746.867		17.6221	1456.93		17.6221	2156.63		17.6221	2904.32		17.6221	3588.85		1856.34	637.164		1856.34	628.285		1856.67	624.138		1858.11	619.142		17.7753
																			17.6389	0.81521		17.6389	745.921		17.6389	1456.17		17.6389	2156.52		17.6389	2903.77		17.6389	3587.92		1857.17	635.891		1857.17	628.285		1857.51	623.547		1858.94	618.779		17.7923
																			17.6556	0.3816		17.6556	745.405		17.6556	1456.39		17.6556	2156.26		17.6556	2903.33		17.6556	3587.16		1858	635.509		1858	625.74		1858.34	623.365		1859.78	618.597		17.8093
																			17.6724	0.25313		17.6724	745.555		17.6724	1456.94		17.6724	2156.16		17.6724	2903.18		17.6724	3586.14		1858.83	637.291		1858.83	628.031		1859.17	623.411		1860.61	619.506		17.8263
																			17.6892	0.95188		17.6892	746.96		17.6892	1456.85		17.6892	2155.92		17.6892	2903.07		17.6892	3585.54		1859.66	636.018		1859.66	627.267		1860	623.775		1861.44	618.779		17.8432
																			17.706	0.86875		17.706	747.333		17.706	1456.81		17.706	2155.68		17.706	2902.99		17.706	3585.02		1860.5	635.891		1860.5	628.031		1860.84	623.956		1862.28	619.051		17.8602
																			17.7227	0.33129		17.7227	747.366		17.7227	1456.62		17.7227	2155.49		17.7227	2902.44		17.7227	3585.08		1861.33	636.909		1861.33	629.049		1861.67	623.547		1863.11	618.779		17.8772
																			17.7395	0.06409		17.7395	746.801		17.7395	1456.73		17.7395	2155.52		17.7395	2902.2		17.7395	3584.72		1862.16	636.909		1862.16	628.794		1862.5	623.275		1863.95	617.96		17.8941
																			17.7563	0.31381		17.7563	746.46		17.7563	1457.13		17.7563	2155.49		17.7563	2902.78		17.7563	3583.74		1862.99	637.036		1862.99	627.012		1863.33	623.365		1864.78	618.415		17.9111
																			17.7731	0.62106		17.7731	746.203		17.7731	1457.37		17.7731	2155.33		17.7731	2903.36		17.7731	3583.51		1863.82	636.146		1863.82	627.776		1864.17	623.775		1865.61	618.324		17.9281
																			17.7898	1.0741		17.7898	747.482		17.7898	1457.81		17.7898	2156.03		17.7898	2903.33		17.7898	3583.61		1864.65	635.891		1864.65	627.776		1865	623.638		1866.45	617.96		17.9451
																			17.8066	0.58871		17.8066	747.935		17.8066	1456.97		17.8066	2156.16		17.8066	2903.35		17.8066	3583.98		1865.48	636.527		1865.48	627.012		1865.83	623.456		1867.28	619.142		17.962
																			17.8234	0.4798		17.8234	746.745		17.8234	1458.03		17.8234	2155.82		17.8234	2903.3		17.8234	3584.05		1866.31	636.4		1866.31	628.54		1866.66	622.684		1868.11	618.415		17.979
																			17.8402	0.27658		17.8402	745.436		17.8402	1458.89		17.8402	2155.67		17.8402	2903.33		17.8402	3584.35		1867.14	634.618		1867.14	628.031		1867.5	622.684		1868.95	617.688		17.996
																			17.8569	0.50738		17.8569	745.52		17.8569	1459.76		17.8569	2155.62		17.8569	2902.64		17.8569	3584.35		1867.97	636.146		1867.97	627.776		1868.33	623.502		1869.78	618.779		18.013
																			17.8737	0.68953		17.8737	746.641		17.8737	1458.96		17.8737	2155.46		17.8737	2902.63		17.8737	3584.68		1868.81	635.127		1868.81	629.812		1869.16	623.638		1870.61	617.506
																			17.8905	0.39913		17.8905	747.107		17.8905	1456.08		17.8905	2155.31		17.8905	2902.17		17.8905	3585.66		1869.64	635.636		1869.64	626.758		1869.99	623.275		1871.44	617.688
																			17.9073	-0.1		17.9073	746.939		17.9073	1454.6		17.9073	2155.27		17.9073	2902.51		17.9073	3585.97		1870.47	635.127		1870.47	627.012		1870.82	622.865		1872.28	617.051
																			17.924	0.2059		17.924	747.714		17.924	1455.37		17.924	2156.14		17.924	2902.59		17.924	3585.74		1871.3	635.255		1871.3	626.249		1871.65	623.229		1873.11	617.415
																			17.9408	0.70785		17.9408	747.129		17.9408	1457.03		17.9408	2156.2		17.9408	2902.79		17.9408	3584.25		1872.13	633.982		1872.13	628.54		1872.49	623.365		1873.94	617.142
																			17.9576	0.82262		17.9576	746.188		17.9576	1457.29		17.9576	2155.5		17.9576	2902.81		17.9576	3584.62		1872.96	637.291		1872.96	628.285		1873.32	623.684		1874.77	618.415
																			17.9744	0.96081		17.9744	746.431		17.9744	1457.93		17.9744	2154.98		17.9744	2903.18		17.9744	3585.83		1873.79	635.636		1873.79	626.758		1874.15	623.411		1875.61	617.324
																			17.9911	0.88202		17.9911	746.377		17.9911	1459.65		17.9911	2155.27		17.9911	2903.67		17.9911	3586.27		1874.62	634.873		1874.62	629.812		1874.98	623.32		1876.44	618.506
																			18.0079	0.38611		18.0079	747.034		18.0079	1458.8		18.0079	2155.97		18.0079	2903.58		18.0079	3585.26		1875.45	635.382		1875.45	629.303		1875.81	623.502		1877.27	618.051
																																					1876.28	634.364		1876.28	626.249		1876.64	623.093		1878.1	618.051
																																					1877.1	635.127		1877.1	628.031		1877.47	623.275		1878.93	617.779
																																					1877.93	635.891		1877.93	627.012		1878.3	622.911		1879.77	618.506
																																					1878.76	634.618		1878.76	628.285		1879.13	622.956		1880.6	618.051
																																					1879.59	636.018		1879.59	627.267		1879.96	622.729		1881.43	617.779
																																					1880.42	634.491		1880.42	628.031		1880.79	623.138		1882.26	617.324
																																					1881.25	634.873		1881.25	628.031		1881.62	623.229		1883.09	618.506
																																					1882.08	634.491		1882.08	630.067		1882.45	622.729		1883.92	617.96
																																					1882.91	636.273		1882.91	627.776		1883.28	623.729		1884.75	618.324
																																					1883.74	634.364		1883.74	627.012		1884.11	623.729		1885.59	617.688
																																					1884.57	635.764		1884.57	627.776		1884.94	623.956		1886.42	617.869
																																					1885.39	635.636		1885.39	626.758		1885.77	623.729		1887.25	617.869
																																					1886.22	635.636		1886.22	627.267		1886.6	623.593		1888.08	618.597
																																					1887.05	635		1887.05	628.794		1887.43	623.638		1888.91	617.688
																																					1887.88	635.509		1887.88	628.794		1888.26	623.865		1889.74	618.779
																																					1888.71	634.746		1888.71	629.049		1889.09	623.684		1890.57	617.688
																																					1889.54	633.982		1889.54	629.049		1889.92	622.729		1891.4	617.779
																																					1890.36	635.636		1890.36	626.758		1890.75	623.138		1892.23	618.779
																																					1891.19	636.146		1891.19	627.776		1891.58	622.956		1893.06	617.324
																																					1892.02	636.146		1892.02	627.522		1892.41	623.638		1893.89	618.506
																																					1892.85	634.873		1892.85	627.012		1893.24	623.502		1894.72	618.96
																																					1893.67	635.127		1893.67	626.249		1894.06	623.138		1895.55	617.869
																																					1894.5	636.146		1894.5	626.758		1894.89	623.411		1896.38	618.051
																																					1895.33	636.146		1895.33	627.267		1895.72	623.547		1897.21	618.324
																																					1896.16	635.127		1896.16	627.267		1896.55	623.229		1898.04	618.051
																																					1896.98	635.127		1896.98	626.249		1897.38	623.229		1898.87	618.142
																																					1897.81	635.127		1897.81	625.74		1898.21	623.047		1899.7	618.869
																																					1898.64	635.255		1898.64	627.522		1899.03	623.093		1900.53	618.324
																																					1899.46	634.746		1899.46	628.794		1899.86	623.775		1901.36	617.779
																																					1900.29	634.746		1900.29	627.776		1900.69	623.547		1902.18	618.597
																																					1901.12	635.382		1901.12	627.267		1901.52	623.184		1903.01	617.869
																																					1901.94	635.127		1901.94	627.012		1902.35	622.775		1903.84	617.324
																																					1902.77	633.982		1902.77	625.994		1903.17	623.138		1904.67	618.324
																																					1903.6	635.636		1903.6	627.012		1904	622.729		1905.5	617.869
																																					1904.42	636.4		1904.42	627.012		1904.83	623.411		1906.33	617.869
																																					1905.25	634.873		1905.25	625.994		1905.66	623.275		1907.16	617.506
																																					1906.07	634.746		1906.07	628.794		1906.48	622.82		1907.98	617.96
																																					1906.9	635.509		1906.9	627.522		1907.31	622.729		1908.81	617.779
																																					1907.72	635.127		1907.72	629.812		1908.14	622.502		1909.64	617.688
																																					1908.55	633.218		1908.55	628.285		1908.96	622.911		1910.47	617.506
																																					1909.38	635.382		1909.38	627.012		1909.79	622.593		1911.3	617.233
																																					1910.2	634.236		1910.2	627.012		1910.62	622.775		1912.12	617.051
																																					1911.03	633.6		1911.03	627.012		1911.44	622.865		1912.95	618.051
																																					1911.85	633.218		1911.85	627.012		1912.27	622.184		1913.78	617.506
																																					1912.68	634.109		1912.68	625.231		1913.1	622.547		1914.61	617.869
																																					1913.5	635.382		1913.5	628.794		1913.92	622.502		1915.43	617.233
																																					1914.33	633.982		1914.33	626.758		1914.75	622.865		1916.26	617.688
																																					1915.15	633.473		1915.15	628.54		1915.58	623.184		1917.09	617.233
																																					1915.98	635.255		1915.98	627.522		1916.4	622.411		1917.92	617.415
																																					1916.8	633.091		1916.8	627.776		1917.23	622.775		1918.74	617.415
																																					1917.63	633.473		1917.63	626.503		1918.05	622.411		1919.57	616.415
																																					1918.45	634.236		1918.45	626.758		1918.88	622.865		1920.4	617.96
																																					1919.27	633.473		1919.27	627.267		1919.7	622.547		1921.22	617.506
																																					1920.1	633.473		1920.1	627.012		1920.53	622.729		1922.05	617.779
																																					1920.92	633.6		1920.92	629.049		1921.36	622.684		1922.88	617.869
																																					1921.75	632.964		1921.75	627.267		1922.18	622.184		1923.7	617.597
																																					1922.57	633.473		1922.57	628.794		1923.01	622.502		1924.53	616.597
																																					1923.39	632.327		1923.39	627.267		1923.83	622.911		1925.36	617.688
																																					1924.22	633.091		1924.22	628.285		1924.66	622.093		1926.18	617.597
																																					1925.04	633.091		1925.04	626.249		1925.48	622.32		1927.01	616.779
																																					1925.87	631.818		1925.87	628.031		1926.31	622.275		1927.83	617.869
																																					1926.69	631.946		1926.69	627.522		1927.13	622.547		1928.66	617.597
																																					1927.51	632.2		1927.51	627.267		1927.95	622.956		1929.48	617.142
																																					1928.34	632.709		1928.34	628.285		1928.78	622.729		1930.31	617.233
																																					1929.16	632.964		1929.16	628.031		1929.6	623.093		1931.14	617.233
																																					1929.98	631.436		1929.98	627.522		1930.43	622.865		1931.96	617.324
																																					1930.8	633.091		1930.8	628.285		1931.25	622.684		1932.79	617.869
																																					1931.63	631.564		1931.63	625.231		1932.08	622.638		1933.61	617.415
																																					1932.45	631.691		1932.45	629.049		1932.9	622.547		1934.44	617.869
																																					1933.27	630.8		1933.27	628.031		1933.72	622.502		1935.26	618.051
																																					1934.1	631.309		1934.1	625.231		1934.55	622.775		1936.09	618.506
																																					1934.92	631.309		1934.92	628.031		1935.37	622.82		1936.91	617.142
																																					1935.74	631.691		1935.74	627.267		1936.19	623.184		1937.74	617.779
																																					1936.56	631.436		1936.56	627.267		1937.02	623.093		1938.56	617.506
																																					1937.38	632.582		1937.38	626.758		1937.84	623.456		1939.38	617.96
																																					1938.21	631.436		1938.21	626.503		1938.66	623.138		1940.21	616.96
																																					1939.03	633.091		1939.03	624.722		1939.49	623.547		1941.03	618.233
																																					1939.85	632.582		1939.85	627.522		1940.31	622.911		1941.86	617.324
																																					1940.67	632.073		1940.67	628.285		1941.13	623.365		1942.68	617.506
																																					1941.49	631.436		1941.49	627.012		1941.96	622.911		1943.51	617.506
																																					1942.31	632.327		1942.31	628.285		1942.78	622.82		1944.33	617.869
																																					1943.14	631.691		1943.14	626.249		1943.6	622.729		1945.15	617.324
																																					1943.96	631.182		1943.96	626.503		1944.42	623.093		1945.98	617.597
																																					1944.78	631.055		1944.78	627.267		1945.25	623.138		1946.8	617.597
																																					1945.6	630.673		1945.6	627.522		1946.07	622.956		1947.62	618.415
																																					1946.42	631.309		1946.42	625.485		1946.89	623.047		1948.45	617.233
																																					1947.24	631.309		1947.24	625.74		1947.71	623.229		1949.27	616.96
																																					1948.06	631.309		1948.06	626.503		1948.54	623.365		1950.09	617.869
																																					1948.88	633.346		1948.88	625.74		1949.36	622.456		1950.92	617.324
																																					1949.7	632.709		1949.7	625.74		1950.18	622.547		1951.74	617.688
																																					1950.52	632.455		1950.52	627.267		1951	623.502		1952.56	617.779
																																					1951.34	631.309		1951.34	629.303		1951.82	623.138		1953.38	616.779
																																					1952.17	631.309		1952.17	627.012		1952.64	622.684		1954.21	617.233
																																					1952.99	631.946		1952.99	627.776		1953.47	623.32		1955.03	617.688
																																					1953.81	631.055		1953.81	626.758		1954.29	622.775		1955.85	617.779
																																					1954.63	631.691		1954.63	627.012		1955.11	622.229		1956.67	617.415
																																					1955.45	631.309		1955.45	628.794		1955.93	623.047		1957.5	617.142
																																					1956.27	632.2		1956.27	627.012		1956.75	623.275		1958.32	616.415
																																					1957.08	631.564		1957.08	627.012		1957.57	622.729		1959.14	617.506
																																					1957.9	632.582		1957.9	627.012		1958.39	622.138		1959.96	616.415
																																					1958.72	631.436		1958.72	624.212		1959.21	622.547		1960.79	616.869
																																					1959.54	631.946		1959.54	628.031		1960.03	622.547		1961.61	617.051
																																					1960.36	631.564		1960.36	627.522		1960.85	622.365		1962.43	617.324
																																					1961.18	630.8		1961.18	626.758		1961.68	622.502		1963.25	617.415
																																					1962	631.182		1962	626.503		1962.5	622.002		1964.07	616.779
																																					1962.82	630.927		1962.82	626.758		1963.32	622.275		1964.89	616.688
																																					1963.64	630.418		1963.64	627.267		1964.14	622.229		1965.71	617.506
																																					1964.46	629.782		1964.46	626.249		1964.96	622.229		1966.54	616.869
																																					1965.28	631.055		1965.28	627.522		1965.78	622.093		1967.36	617.324
																																					1966.09	629.909		1966.09	628.285		1966.6	622.229		1968.18	617.415
																																					1966.91	630.291		1966.91	627.522		1967.42	622.093		1969	617.597
																																					1967.73	628.636		1967.73	625.994		1968.24	621.82		1969.82	617.051
																																					1968.55	629.527		1968.55	627.012		1969.05	621.365		1970.64	616.506
																																					1969.37	629.655		1969.37	625.74		1969.87	622.32		1971.46	616.869
																																					1970.19	630.036		1970.19	624.722		1970.69	621.275		1972.28	616.324
																																					1971	629.782		1971	626.758		1971.51	621.593		1973.1	616.597
																																					1971.82	630.546		1971.82	625.994		1972.33	622.002		1973.92	616.324
																																					1972.64	629.655		1972.64	626.249		1973.15	622.093		1974.74	617.051
																																					1973.46	629.018		1973.46	625.994		1973.97	621.729		1975.56	616.688
																																					1974.28	629.655		1974.28	626.249		1974.79	622.047		1976.38	616.597
																																					1975.09	629.909		1975.09	627.012		1975.61	621.502		1977.2	615.869
																																					1975.91	629.655		1975.91	626.503		1976.43	621.411		1978.02	616.233
																																					1976.73	630.291		1976.73	625.485		1977.24	622.047		1978.84	616.869
																																					1977.54	629.909		1977.54	625.231		1978.06	621.411		1979.66	616.779
																																					1978.36	629.4		1978.36	626.249		1978.88	621.456		1980.48	617.324
																																					1979.18	628.636		1979.18	624.976		1979.7	622.184		1981.3	617.324
																																					1980	629.273		1980	625.994		1980.52	621.729		1982.12	616.688
																																					1980.81	629.018		1980.81	624.976		1981.34	621.593		1982.94	616.415
																																					1981.63	629.146		1981.63	624.467		1982.15	621.865		1983.76	617.142
																																					1982.45	629.782		1982.45	624.212		1982.97	621.411		1984.58	616.415
																																					1983.26	629.527		1983.26	624.212		1983.79	621.684		1985.39	616.688
																																					1984.08	630.418		1984.08	624.467		1984.61	621.32		1986.21	616.324
																																					1984.89	630.164		1984.89	625.485		1985.42	621.275		1987.03	616.415
																																					1985.71	629.146		1985.71	625.231		1986.24	621.956		1987.85	616.597
																																					1986.53	628.255		1986.53	625.485		1987.06	621.093		1988.67	616.415
																																					1987.34	628.382		1987.34	623.958		1987.88	622.002		1989.49	617.051
																																					1988.16	628.509		1988.16	625.74		1988.69	621.138		1990.31	616.688
																																					1988.97	629.4		1988.97	626.249		1989.51	621.547		1991.12	616.688
																																					1989.79	628.891		1989.79	625.74		1990.33	622.047		1991.94	616.142
																																					1990.61	629.146		1990.61	625.994		1991.14	621.229		1992.76	615.779
																																					1991.42	628.509		1991.42	625.485		1991.96	621.411		1993.58	616.506
																																					1992.24	630.036		1992.24	624.467		1992.78	621.729		1994.39	615.96
																																					1993.05	629.527		1993.05	624.467		1993.59	621.138		1995.21	616.051
																																					1993.87	629.018		1993.87	624.722		1994.41	621.138		1996.03	615.779
																																					1994.68	630.291		1994.68	624.212		1995.23	621.865		1996.85	615.688
																																					1995.5	630.164		1995.5	623.958		1996.04	621.047		1997.66	615.688
																																					1996.31	630.927		1996.31	625.231		1996.86	621.184		1998.48	615.869
																																					1997.13	629.782		1997.13	625.231		1997.68	621.411		1999.3	616.96
																																					1997.94	630.164		1997.94	624.722		1998.49	621.093		2000.12	615.506
																																					1998.76	629.527		1998.76	624.722		1999.31	621.456		2000.93	615.597
																																					1999.57	629.782		1999.57	624.467		2000.12	621.229		2001.75	615.233
																																					2000.39	629.782		2000.39	625.74		2000.94	620.82		2002.57	615.688
																																					2001.2	630.036		2001.2	624.976		2001.75	621.275		2003.38	615.779
																																					2002.01	629.782		2002.01	623.703		2002.57	620.956		2004.2	615.869
																																					2002.83	629.273		2002.83	624.976		2003.39	620.456		2005.02	615.415
																																					2003.64	630.036		2003.64	624.722		2004.2	621.229		2005.83	616.233
																																					2004.46	629.4		2004.46	623.703		2005.02	620.911		2006.65	616.233
																																					2005.27	629.909		2005.27	625.74		2005.83	620.593		2007.47	615.688
																																					2006.08	629.018		2006.08	624.467		2006.65	620.911		2008.28	616.415
																																					2006.9	630.036		2006.9	624.467		2007.46	620.684		2009.1	615.597
																																					2007.71	629.273		2007.71	623.958		2008.28	620.593		2009.91	615.779
																																					2008.52	629.018		2008.52	624.467		2009.09	620.911		2010.73	615.779
																																					2009.34	629.018		2009.34	623.958		2009.9	620.729		2011.54	615.869
																																					2010.15	629.4		2010.15	623.958		2010.72	620.865		2012.36	616.324
																																					2010.96	629.782		2010.96	622.94		2011.53	620.684		2013.18	615.506
																																					2011.78	629.909		2011.78	624.722		2012.35	620.729		2013.99	615.597
																																					2012.59	629.146		2012.59	624.722		2013.16	621.002		2014.81	616.233
																																					2013.4	629.527		2013.4	624.467		2013.98	621.047		2015.62	616.324
																																					2014.21	629.655		2014.21	623.958		2014.79	620.865		2016.44	615.869
																																					2015.03	629.909		2015.03	625.231		2015.6	620.547		2017.25	616.051
																																					2015.84	630.164		2015.84	622.94		2016.42	621.002		2018.07	615.597
																																					2016.65	629.655		2016.65	623.449		2017.23	620.911		2018.88	615.869
																																					2017.46	631.055		2017.46	624.467		2018.05	620.775		2019.7	615.415
																																					2018.28	629.782		2018.28	624.722		2018.86	620.456		2020.51	615.324
																																					2019.09	629.655		2019.09	625.485		2019.67	620.865		2021.32	615.597
																																					2019.9	629.4		2019.9	625.74		2020.49	620.365		2022.14	615.779
																																					2020.71	629.4		2020.71	624.212		2021.3	620.911		2022.95	615.869
																																					2021.52	628.891		2021.52	625.231		2022.11	620.729		2023.77	615.051
																																					2022.34	629.273		2022.34	623.958		2022.92	621.093		2024.58	616.415
																																					2023.15	629.018		2023.15	624.722		2023.74	620.547		2025.4	615.142
																																					2023.96	630.036		2023.96	626.249		2024.55	620.593		2026.21	616.324
																																					2024.77	629.782		2024.77	625.231		2025.36	621.275		2027.02	615.597
																																					2025.58	629.018		2025.58	624.976		2026.18	620.411		2027.84	615.324
																																					2026.39	629.146		2026.39	622.685		2026.99	620.729		2028.65	615.324
																																					2027.2	630.291		2027.2	625.231		2027.8	620.547		2029.46	614.96
																																					2028.02	629.4		2028.02	624.722		2028.61	620.502		2030.28	615.051
																																					2028.83	628.891		2028.83	624.722		2029.42	620.956		2031.09	615.233
																																					2029.64	629.146		2029.64	623.194		2030.24	619.956		2031.9	615.415
																																					2030.45	629.273		2030.45	627.012		2031.05	620.911		2032.72	615.233
																																					2031.26	629.018		2031.26	624.976		2031.86	620.547		2033.53	616.142
																																					2032.07	629.655		2032.07	625.74		2032.67	620.911		2034.34	615.688
																																					2032.88	630.164		2032.88	625.74		2033.48	621.32		2035.16	615.688
																																					2033.69	629.782		2033.69	623.958		2034.3	621.002		2035.97	615.506
																																					2034.5	630.673		2034.5	625.485		2035.11	620.456		2036.78	615.597
																																					2035.31	629.4		2035.31	624.722		2035.92	620.593		2037.59	615.779
																																					2036.12	629.909		2036.12	623.194		2036.73	620.82		2038.41	615.779
																																					2036.93	629.527		2036.93	624.722		2037.54	620.32		2039.22	616.506
																																					2037.74	629.782		2037.74	625.231		2038.35	620.956		2040.03	615.051
																																					2038.55	629.782		2038.55	623.703		2039.16	620.593		2040.84	616.415
																																					2039.36	628.764		2039.36	625.485		2039.97	621.002		2041.65	615.688
																																					2040.17	629.273		2040.17	627.776		2040.78	620.638		2042.47	616.688
																																					2040.98	629.527		2040.98	624.722		2041.6	620.775		2043.28	615.506
																																					2041.79	629.018		2041.79	624.722		2042.41	620.865		2044.09	615.688
																																					2042.6	629.4		2042.6	625.485		2043.22	620.865		2044.9	615.688
																																					2043.41	629.4		2043.41	624.722		2044.03	620.365		2045.71	615.324
																																					2044.21	629.146		2044.21	625.231		2044.84	620.229		2046.52	615.869
																																					2045.02	629.655		2045.02	625.231		2045.65	621.093		2047.34	616.142
																																					2045.83	630.036		2045.83	625.74		2046.46	621.047		2048.15	616.142
																																					2046.64	629.527		2046.64	625.74		2047.27	620.684		2048.96	615.415
																																					2047.45	630.8		2047.45	624.722		2048.08	620.82		2049.77	615.779
																																					2048.26	630.418		2048.26	624.467		2048.89	620.275		2050.58	616.233
																																					2049.07	629.4		2049.07	625.74		2049.7	620.775		2051.39	615.688
																																					2049.87	630.418		2049.87	624.976		2050.51	620.275		2052.2	615.779
																																					2050.68	630.8		2050.68	625.231		2051.32	621.047		2053.01	615.506
																																					2051.49	630.164		2051.49	625.231		2052.13	621.093		2053.82	616.051
																																					2052.3	628.764		2052.3	623.703		2052.93	620.684		2054.63	615.415
																																					2053.11	630.036		2053.11	624.976		2053.74	620.638		2055.44	615.415
																																					2053.91	629.018		2053.91	624.976		2054.55	620.684		2056.25	615.869
																																					2054.72	629.273		2054.72	625.74		2055.36	620.229		2057.06	615.869
																																					2055.53	630.8		2055.53	624.467		2056.17	621.138		2057.87	615.96
																																					2056.34	629.273		2056.34	625.994		2056.98	620.547		2058.68	615.869
																																					2057.15	630.673		2057.15	624.722		2057.79	620.729		2059.49	615.142
																																					2057.95	630.036		2057.95	624.722		2058.6	620.229		2060.3	616.051
																																					2058.76	628.764		2058.76	625.485		2059.41	620.365		2061.11	616.324
																																					2059.57	629.4		2059.57	624.467		2060.21	621.138		2061.92	616.597
																																					2060.37	629.527		2060.37	624.212		2061.02	620.684		2062.73	615.597
																																					2061.18	630.036		2061.18	624.976		2061.83	621.275		2063.54	615.688
																																					2061.99	630.036		2061.99	626.503		2062.64	620.593		2064.35	615.688
																																											2063.45	620.865		2065.16	615.415
																																											2064.25	620.82		2065.97	616.051
																																											2065.06	620.911		2066.78	615.597
																																											2065.87	620.82		2067.59	615.779
																																											2066.68	620.502		2068.4	615.869
																																											2067.49	620.82		2069.2	615.688
																																											2068.29	620.911		2070.01	615.688
																																											2069.1	620.638		2070.82	615.597
																																											2069.91	620.593		2071.63	615.506
																																											2070.71	620.82		2072.44	615.506
																																											2071.52	620.82		2073.25	615.688
																																											2072.33	620.638		2074.05	616.051
																																											2073.14	620.593		2074.86	615.506
																																											2073.94	620.956		2075.67	615.506
																																											2074.75	620.775		2076.48	615.415
																																											2075.56	620.456		2077.29	615.688
																																											2076.36	620.82		2078.09	616.051
																																											2077.17	620.638		2078.9	615.688
																																											2077.97	620.865		2079.71	615.688
																																											2078.78	620.32		2080.51	615.96
																																											2079.59	620.684		2081.32	616.142
																																											2080.39	621.411		2082.13	615.506
																																											2081.2	620.502		2082.94	615.506
																																											2082	620.865		2083.74	615.688
																																											2082.81	620.32		2084.55	615.779
																																											2083.62	620.729		2085.36	615.506
																																											2084.42	620.82		2086.16	615.869
																																											2085.23	620.82		2086.97	615.233
																																											2086.03	620.456		2087.78	615.597
																																											2086.84	621.138		2088.58	615.779
																																											2087.64	620.82		2089.39	615.869
																																											2088.45	621.093		2090.19	616.324
																																											2089.25	620.911		2091	615.688
																																											2090.06	620.638		2091.81	614.96
																																											2090.86	621.502		2092.61	616.506
																																											2091.67	620.729		2093.42	615.597
																																											2092.47	620.047		2094.22	615.415
																																											2093.27	621.047		2095.03	615.96
																																											2094.08	621.229		2095.83	615.597
																																											2094.88	620.775		2096.64	616.051
																																											2095.69	620.911		2097.44	615.779
																																											2096.49	620.865		2098.25	615.779
																																											2097.29	621.138		2099.06	615.597
																																											2098.1	620.911		2099.86	615.869
																																											2098.9	620.775		2100.66	616.324
																																											2099.71	621.411
																																											2100.51	620.729
[truncated: 73 more columns]

## Sheet: Supplementary Figure 2
Supplementary Figure 2
	run 1			run 2			run 3			run 4			run 5			run 6			run 7
	Distance (mm)	Distance (mm)		Distance (mm)	Distance (mm)		Distance (mm)	Distance (mm)		Distance (mm)	Distance (mm)		Distance (mm)	Distance (mm)		Distance (mm)	Distance (mm)		Distance (mm)	Distance (mm)
	-50.0782	-8.02371		-50.1652	-7.13328		-50.0208	-7.9481		-50.1009	-7.37988		-50.0382	-7.64847		-50.1599	-8.53061		-50.0627	-7.33943
	-49.9024	-7.98432		-49.9893	-7.13619		-49.8448	-7.89965		-49.9248	-7.32128		-49.8623	-7.61551		-49.9838	-8.4928		-49.8868	-7.34074
	-49.7266	-7.96365		-49.8133	-7.14698		-49.6688	-7.89497		-49.7488	-7.22096		-49.6865	-7.60215		-49.8078	-8.44408		-49.7109	-7.32131
	-49.5509	-7.92691		-49.6374	-7.15046		-49.4928	-7.8933		-49.5727	-7.17033		-49.5107	-7.56575		-49.6317	-8.42013		-49.535	-7.2293
	-49.3751	-7.91183		-49.4615	-7.14987		-49.3168	-7.87659		-49.3967	-7.05026		-49.3349	-7.55826		-49.4556	-8.38348		-49.3591	-7.17711
	-49.1993	-7.88832		-49.2856	-7.15304		-49.1409	-7.82145		-49.2207	-7.07309		-49.1591	-7.56193		-49.2796	-8.31064		-49.1831	-7.20467
	-49.0235	-7.85276		-49.1096	-7.15018		-48.9649	-7.78373		-49.0446	-7.03895		-48.9833	-7.5396		-49.1035	-8.30059		-49.0072	-7.17201
	-48.8477	-7.81834		-48.9337	-7.14387		-48.7889	-7.77248		-48.8686	-6.92962		-48.8074	-7.47873		-48.9275	-8.26589		-48.8313	-7.16421
	-48.672	-7.78292		-48.7578	-7.14093		-48.6129	-7.80356		-48.6926	-6.7768		-48.6316	-7.41694		-48.7514	-8.22892		-48.6554	-7.10095
	-48.4962	-7.77062		-48.5819	-7.13542		-48.437	-7.76668		-48.5165	-6.68996		-48.4558	-7.3891		-48.5753	-8.20058		-48.4795	-7.05162
	-48.3204	-7.76314		-48.4059	-7.12577		-48.261	-7.66714		-48.3405	-6.50423		-48.28	-7.37687		-48.3993	-8.11239		-48.3036	-7.03757
	-48.1446	-7.7165		-48.23	-7.09915		-48.085	-7.66939		-48.1645	-6.4736		-48.1042	-7.35753		-48.2232	-8.13236		-48.1277	-7.02972
	-47.9688	-7.69024		-48.0541	-7.06345		-47.909	-7.62355		-47.9884	-6.37352		-47.9284	-7.3314		-48.0471	-8.06692		-47.9518	-7.01407
	-47.793	-7.67189		-47.8781	-6.95139		-47.733	-7.64227		-47.8124	-6.04299		-47.7525	-7.304		-47.8711	-8.04845		-47.7759	-7.00632
	-47.6173	-7.67378		-47.7022	-6.71099		-47.5571	-7.62218		-47.6364	-6.19811		-47.5767	-7.27502		-47.695	-7.94715		-47.6	-6.92612
	-47.4415	-7.61749		-47.5263	-6.49698		-47.3811	-7.60698		-47.4603	-6.65317		-47.4009	-7.23895		-47.5189	-7.89739		-47.4241	-6.91003
	-47.2657	-7.57463		-47.3503	-6.40547		-47.2051	-7.52693		-47.2843	-6.78052		-47.2251	-7.22063		-47.3429	-7.8553		-47.2482	-6.91554
	-47.0899	-7.53954		-47.1744	-6.32976		-47.0291	-7.5027		-47.1082	-6.30623		-47.0493	-7.19229		-47.1668	-7.83667		-47.0723	-6.84588
	-46.9141	-7.52159		-46.9985	-6.20876		-46.8531	-7.49176		-46.9322	-6.00745		-46.8734	-7.17186		-46.9907	-7.79812		-46.8964	-6.80709
	-46.7383	-7.50914		-46.8225	-6.45615		-46.6772	-7.48688		-46.7562	-5.70039		-46.6976	-7.16787		-46.8147	-7.7667		-46.7205	-6.77751
	-46.5626	-7.47306		-46.6466	-6.7099		-46.5012	-7.42115		-46.5801	-5.85807		-46.5218	-7.15658		-46.6386	-7.72163		-46.5446	-6.7467
	-46.3868	-7.44535		-46.4707	-6.76859		-46.3252	-7.43256		-46.4041	-6.30625		-46.346	-7.1012		-46.4625	-7.69076		-46.3687	-6.74443
	-46.211	-7.42677		-46.2948	-6.62619		-46.1492	-7.42078		-46.2281	-6.26775		-46.1702	-7.06389		-46.2865	-7.66305		-46.1928	-6.7263
	-46.0352	-7.41454		-46.1188	-6.44376		-45.9733	-7.35019		-46.052	-6.33305		-45.9943	-7.02483		-46.1104	-7.63189		-46.0169	-6.68983
	-45.8594	-7.39631		-45.9429	-6.34461		-45.7973	-7.2992		-45.876	-5.84069		-45.8185	-7.01055		-45.9344	-7.58315		-45.841	-6.62895
	-45.6837	-7.32575		-45.767	-6.24061		-45.6213	-7.33511		-45.7	-5.88488		-45.6427	-6.99465		-45.7583	-7.54119		-45.6651	-6.63644
	-45.5079	-7.30537		-45.5911	-6.21209		-45.4453	-7.28294		-45.5239	-6.06355		-45.4669	-6.97042		-45.5822	-7.52579		-45.4892	-6.61325
	-45.3321	-7.30647		-45.4151	-6.15132		-45.2694	-7.26922		-45.3479	-5.54198		-45.2911	-6.96464		-45.4061	-7.50507		-45.3133	-6.54476
	-45.1563	-7.27361		-45.2392	-5.99236		-45.0934	-7.23704		-45.1718	-5.42937		-45.1153	-6.94009		-45.2301	-7.47154		-45.1374	-6.52725
	-44.9805	-7.23913		-45.0633	-5.86081		-44.9174	-7.21321		-44.9958	-5.75027		-44.9394	-6.88815		-45.054	-7.44482		-44.9615	-6.49311
	-44.8047	-7.19339		-44.8873	-5.78213		-44.7414	-7.20319		-44.8198	-6.05876		-44.7636	-6.8468		-44.878	-7.42066		-44.7856	-6.4513
	-44.629	-7.17614		-44.7114	-5.79672		-44.5654	-7.12437		-44.6437	-5.98024		-44.5878	-6.83097		-44.7019	-7.38003		-44.6097	-6.47445
	-44.4532	-7.18044		-44.5355	-5.79111		-44.3895	-7.14328		-44.4677	-5.41218		-44.412	-6.81572		-44.5258	-7.31489		-44.4338	-6.44097
	-44.2774	-7.16877		-44.3595	-5.78886		-44.2135	-7.07617		-44.2916	-5.4395		-44.2362	-6.80332		-44.3498	-7.28702		-44.2578	-6.36688
	-44.1016	-7.1274		-44.1836	-5.75754		-44.0375	-7.04716		-44.1156	-5.46237		-44.0603	-6.78871		-44.1737	-7.27725		-44.0819	-6.33445
	-43.9258	-7.08223		-44.0077	-5.73917		-43.8615	-7.06254		-43.9396	-6.06752		-43.8845	-6.7538		-43.9976	-7.25167		-43.906	-6.36146
	-43.7501	-7.03991		-43.8317	-5.73102		-43.6855	-7.01459		-43.7635	-6.46185		-43.7087	-6.72932		-43.8216	-7.20187		-43.7301	-6.33462
	-43.5743	-7.02359		-43.6558	-5.76849		-43.5096	-6.96689		-43.5875	-6.365		-43.5329	-6.69846		-43.6455	-7.18427		-43.5542	-6.3146
	-43.3985	-6.99928		-43.4799	-5.74656		-43.3336	-6.95397		-43.4115	-6.08664		-43.3571	-6.65337		-43.4694	-7.16884		-43.3783	-6.22739
	-43.2227	-6.98849		-43.304	-5.71974		-43.1576	-6.91712		-43.2354	-6.17472		-43.1812	-6.63565		-43.2934	-7.1273		-43.2024	-6.22257
	-43.0469	-6.96406		-43.128	-5.70547		-42.9816	-6.91596		-43.0594	-6.02317		-43.0054	-6.6283		-43.1173	-7.11496		-43.0265	-6.19625
	-42.8711	-6.94407		-42.9521	-5.68459		-42.8057	-6.89678		-42.8834	-5.83466		-42.8296	-6.58472		-42.9412	-7.07494		-42.8506	-6.18447
	-42.6954	-6.89494		-42.7762	-5.65783		-42.6297	-6.86973		-42.7073	-5.71762		-42.6538	-6.55365		-42.7652	-7.05037		-42.6747	-6.14198
	-42.5196	-6.8623		-42.6003	-5.62176		-42.4537	-6.83038		-42.5313	-5.57043		-42.478	-6.52948		-42.5891	-7.01253		-42.4988	-6.09305
	-42.3438	-6.84174		-42.4243	-5.58733		-42.2777	-6.79181		-42.3552	-6.27628		-42.3022	-6.50797		-42.413	-6.99197		-42.3229	-6.1009
	-42.168	-6.81387		-42.2484	-5.55925		-42.1018	-6.77712		-42.1792	-6.19144		-42.1263	-6.45951		-42.237	-6.97577		-42.147	-6.12636
	-41.9922	-6.78853		-42.0725	-5.52559		-41.9258	-6.7417		-42.0032	-5.93102		-41.9505	-6.41979		-42.0609	-6.92424		-41.9711	-6.08239
	-41.8164	-6.75591		-41.8965	-5.49608		-41.7498	-6.70662		-41.8271	-6.0924		-41.7747	-6.38676		-41.8849	-6.91335		-41.7952	-6.03938
	-41.6407	-6.73823		-41.7206	-5.46988		-41.5738	-6.68509		-41.6511	-5.97901		-41.5989	-6.38302		-41.7088	-6.89547		-41.6193	-6.00562
	-41.4649	-6.7069		-41.5447	-5.44517		-41.3978	-6.67243		-41.4751	-5.99782		-41.4231	-6.36512		-41.5327	-6.8667		-41.4434	-5.94948
	-41.2891	-6.67098		-41.3687	-5.41291		-41.2219	-6.63311		-41.299	-5.87224		-41.2473	-6.33188		-41.3567	-6.83294		-41.2675	-5.96445
	-41.1133	-6.64497		-41.1928	-5.38053		-41.0459	-6.58857		-41.123	-5.60615		-41.0714	-6.29171		-41.1806	-6.79511		-41.0916	-5.9096
	-40.9375	-6.59579		-41.0169	-5.3665		-40.8699	-6.55985		-40.947	-5.87624		-40.8956	-6.2743		-41.0045	-6.77513		-40.9157	-5.90827
	-40.7617	-6.5873		-40.8409	-5.34436		-40.6939	-6.60803		-40.7709	-5.77572		-40.7198	-6.26072		-40.8285	-6.7389		-40.7398	-5.82037
	-40.586	-6.58575		-40.665	-5.3087		-40.5179	-6.52721		-40.5949	-6.03837		-40.544	-6.22435		-40.6524	-6.71221		-40.5639	-5.83001
	-40.4102	-6.57098		-40.4891	-5.27002		-40.342	-6.50519		-40.4188	-5.94879		-40.3682	-6.19371		-40.4763	-6.68846		-40.388	-5.79061
	-40.2344	-6.53049		-40.3132	-5.24294		-40.166	-6.51439		-40.2428	-5.6625		-40.1923	-6.16205		-40.3003	-6.6558		-40.2121	-5.7156
	-40.0586	-6.47089		-40.1372	-5.23005		-39.99	-6.45926		-40.0668	-6.01324		-40.0165	-6.13032		-40.1242	-6.62285		-40.0362	-5.7243
	-39.8828	-6.44448		-39.9613	-5.23205		-39.814	-6.42725		-39.8907	-5.77969		-39.8407	-6.1186		-39.9481	-6.58286		-39.8603	-5.70523
	-39.7071	-6.42723		-39.7854	-5.18968		-39.6381	-6.40062		-39.7147	-5.69014		-39.6649	-6.09183		-39.7721	-6.5574		-39.6844	-5.65549
	-39.5313	-6.41864		-39.6095	-5.1403		-39.4621	-6.3703		-39.5387	-5.53117		-39.4891	-6.04214		-39.596	-6.53578		-39.5084	-5.64449
	-39.3555	-6.38711		-39.4335	-5.11838		-39.2861	-6.3343		-39.3626	-5.53686		-39.3132	-6.01091		-39.4199	-6.50439		-39.3325	-5.62075
	-39.1797	-6.34727		-39.2576	-5.09858		-39.1101	-6.31972		-39.1866	-5.77674		-39.1374	-6.00349		-39.2439	-6.49294		-39.1566	-5.59701
	-39.0039	-6.31745		-39.0817	-5.08414		-38.9342	-6.31747		-39.0106	-5.78424		-38.9616	-6.00667		-39.0678	-6.44801		-38.9807	-5.57938
	-38.8281	-6.29782		-38.9057	-5.06046		-38.7582	-6.30971		-38.8345	-6.22938		-38.7858	-5.98068		-38.8918	-6.42175		-38.8048	-5.50345
	-38.6524	-6.28482		-38.7298	-5.05453		-38.5822	-6.25374		-38.6585	-5.56373		-38.61	-5.95584		-38.7157	-6.38467		-38.6289	-5.51495
	-38.4766	-6.25369		-38.5539	-5.02484		-38.4062	-6.19645		-38.4824	-5.75022		-38.4342	-5.91802		-38.5396	-6.37289		-38.453	-5.44736
	-38.3008	-6.2161		-38.3779	-4.99615		-38.2302	-6.17154		-38.3064	-5.55864		-38.2583	-5.87955		-38.3635	-6.36895		-38.2771	-5.46829
	-38.125	-6.17944		-38.202	-4.94379		-38.0543	-6.1953		-38.1304	-5.23433		-38.0825	-5.86224		-38.1875	-6.33927		-38.1012	-5.42889
	-37.9492	-6.16018		-38.0261	-4.9354		-37.8783	-6.15045		-37.9543	-5.1733		-37.9067	-5.85536		-38.0114	-6.30321		-37.9253	-5.45131
	-37.7734	-6.14458		-37.8501	-4.9114		-37.7023	-6.14294		-37.7783	-5.08363		-37.7309	-5.82921		-37.8354	-6.24625		-37.7494	-5.38589
	-37.5977	-6.08917		-37.6742	-4.88901		-37.5263	-6.1088		-37.6022	-5.51195		-37.5551	-5.81089		-37.6593	-6.25584		-37.5735	-5.33837
	-37.4219	-6.07031		-37.4983	-4.86143		-37.3503	-6.0628		-37.4262	-5.07538		-37.3792	-5.77497		-37.4832	-6.21863		-37.3976	-5.30168
	-37.2461	-6.02856		-37.3224	-4.83404		-37.1744	-6.04063		-37.2502	-5.49624		-37.2034	-5.74729		-37.3072	-6.17472		-37.2217	-5.27376
	-37.0703	-6.00233		-37.1464	-4.80421		-36.9984	-6.03686		-37.0741	-5.26677		-37.0276	-5.71231		-37.1311	-6.15241		-37.0458	-5.25117
	-36.8945	-5.99291		-36.9705	-4.74883		-36.8224	-5.99654		-36.8981	-5.25841		-36.8518	-5.68569		-36.955	-6.11592		-36.8699	-5.23904
	-36.7188	-5.98028		-36.7946	-4.73479		-36.6464	-5.9831		-36.7221	-5.05955		-36.676	-5.65211		-36.779	-6.09449		-36.694	-5.24809
	-36.543	-5.95528		-36.6187	-4.74878		-36.4705	-5.94238		-36.546	-4.91998		-36.5002	-5.63888		-36.6029	-6.03737		-36.5181	-5.18375
	-36.3672	-5.91867		-36.4427	-4.71302		-36.2945	-5.92992		-36.37	-5.3394		-36.3243	-5.62539		-36.4268	-6.03169		-36.3422	-5.12693
	-36.1914	-5.90782		-36.2668	-4.70354		-36.1185	-5.90628		-36.194	-4.98961		-36.1485	-5.59115		-36.2508	-6.03705		-36.1663	-5.10223
	-36.0156	-5.87877		-36.0909	-4.65459		-35.9425	-5.88243		-36.0179	-5.24105		-35.9727	-5.56042		-36.0747	-6.00888		-35.9904	-5.0911
	-35.8398	-5.84729		-35.9149	-4.62359		-35.7666	-5.82871		-35.8419	-5.26766		-35.7969	-5.53537		-35.8986	-5.96672		-35.8145	-5.09803
	-35.6641	-5.80128		-35.739	-4.57785		-35.5906	-5.81591		-35.6658	-5.11965		-35.6211	-5.50483		-35.7226	-5.91333		-35.6386	-4.97101
	-35.4883	-5.78002		-35.5631	-4.56522		-35.4146	-5.76878		-35.4898	-4.95347		-35.4453	-5.46979		-35.5465	-5.88549		-35.4627	-5.00323
	-35.3125	-5.7507		-35.3871	-4.53916		-35.2386	-5.75601		-35.3138	-5.11246		-35.2694	-5.44799		-35.3704	-5.86865		-35.2868	-4.92024
	-35.1367	-5.75828		-35.2112	-4.52763		-35.0626	-5.78583		-35.1377	-5.24827		-35.0936	-5.44034		-35.1944	-5.8533		-35.1108	-4.96381
	-34.9609	-5.72606		-35.0353	-4.51617		-34.8867	-5.71315		-34.9617	-5.14631		-34.9178	-5.40924		-35.0183	-5.81501		-34.935	-4.94247
	-34.7852	-5.68604		-34.8593	-4.4814		-34.7107	-5.65233		-34.7857	-4.87318		-34.742	-5.37124		-34.8422	-5.79912		-34.7591	-4.90111
	-34.6094	-5.64053		-34.6834	-4.44681		-34.5347	-5.66882		-34.6096	-5.08606		-34.5662	-5.33455		-34.6662	-5.78761		-34.5831	-4.84039
	-34.4336	-5.62452		-34.5075	-4.42158		-34.3587	-5.60658		-34.4336	-4.98518		-34.3903	-5.29814		-34.4901	-5.74273		-34.4072	-4.78969
	-34.2578	-5.6097		-34.3316	-4.41318		-34.1827	-5.58703		-34.2576	-4.95878		-34.2145	-5.27739		-34.3141	-5.71013		-34.2313	-4.78741
	-34.082	-5.58617		-34.1556	-4.39		-34.0068	-5.57021		-34.0815	-4.859		-34.0387	-5.25111		-34.138	-5.68178		-34.0554	-4.78212
	-33.9062	-5.54989		-33.9797	-4.36147		-33.8308	-5.552		-33.9055	-4.68154		-33.8629	-5.24507		-33.9619	-5.63999		-33.8795	-4.7862
	-33.7304	-5.52099		-33.8038	-4.32908		-33.6548	-5.54319		-33.7294	-4.86056		-33.6871	-5.23076		-33.7859	-5.64442		-33.7036	-4.74991
	-33.5547	-5.48126		-33.6279	-4.30235		-33.4788	-5.50189		-33.5534	-4.71688		-33.5112	-5.21279		-33.6098	-5.60831		-33.5277	-4.67125
	-33.3789	-5.45847		-33.4519	-4.27926		-33.3028	-5.48766		-33.3774	-5.01511		-33.3354	-5.16402		-33.4337	-5.55753		-33.3518	-4.64587
	-33.2031	-5.43522		-33.276	-4.23923		-33.1269	-5.44201		-33.2013	-5.02005		-33.1596	-5.12164		-33.2577	-5.50458		-33.1759	-4.64366
	-33.0273	-5.42298		-33.1001	-4.20327		-32.9509	-5.43875		-33.0253	-4.69472		-32.9838	-5.0934		-33.0816	-5.4923		-33	-4.65596
	-32.8515	-5.38448		-32.9241	-4.19369		-32.7749	-5.4043		-32.8493	-4.49494		-32.808	-5.08517		-32.9055	-5.47029		-32.8241	-4.63019
	-32.6758	-5.36087		-32.7482	-4.18578		-32.5989	-5.38352		-32.6732	-4.72782		-32.6322	-5.06398		-32.7295	-5.4717		-32.6482	-4.56606
	-32.5	-5.3406		-32.5723	-4.16504		-32.423	-5.3769		-32.4972	-4.76746		-32.4563	-5.0365		-32.5534	-5.40992		-32.4723	-4.57135
	-32.3242	-5.31768		-32.3963	-4.12355		-32.247	-5.32156		-32.3212	-4.22534		-32.2805	-5.01781		-32.3773	-5.38096		-32.2964	-4.59682
	-32.1484	-5.28327		-32.2204	-4.071		-32.071	-5.28317		-32.1451	-4.43219		-32.1047	-5.00725		-32.2013	-5.36055		-32.1205	-4.6343
	-31.9726	-5.25603		-32.0445	-4.04445		-31.895	-5.2735		-31.9691	-4.36099		-31.9289	-4.9827		-32.0252	-5.33101		-31.9446	-4.68234
	-31.7968	-5.24444		-31.8685	-4.03968		-31.719	-5.26047		-31.793	-4.58669		-31.7531	-4.9555		-31.8491	-5.3036		-31.7687	-4.72619
	-31.6211	-5.20495		-31.6926	-4.02745		-31.5431	-5.23194		-31.617	-4.62977		-31.5772	-4.91705		-31.6731	-5.2705		-31.5928	-4.71605
	-31.4453	-5.16733		-31.5167	-4.00768		-31.3671	-5.2263		-31.441	-4.5672		-31.4014	-4.89997		-31.497	-5.25086		-31.4169	-4.70825
	-31.2695	-5.14612		-31.3408	-3.98657		-31.1911	-5.1872		-31.2649	-4.34434		-31.2256	-4.89872		-31.3209	-5.21247		-31.241	-4.57864
	-31.0937	-5.13548		-31.1648	-3.93928		-31.0151	-5.12996		-31.0889	-4.31889		-31.0498	-4.88991		-31.1449	-5.17731		-31.0651	-4.41232
	-30.9179	-5.12078		-30.9889	-3.90428		-30.8392	-5.11758		-30.9129	-4.32743		-30.874	-4.85827		-30.9688	-5.16123		-30.8892	-4.31349
	-30.7421	-5.10831		-30.813	-3.88463		-30.6632	-5.08886		-30.7368	-4.44872		-30.6981	-4.82609		-30.7928	-5.15671		-30.7133	-4.28685
	-30.5664	-5.09144		-30.637	-3.86072		-30.4872	-5.0627		-30.5608	-4.44635		-30.5223	-4.80154		-30.6167	-5.15721		-30.5374	-4.29691
	-30.3906	-5.0581		-30.4611	-3.84361		-30.3112	-5.03701		-30.3848	-4.32462		-30.3465	-4.78925		-30.4406	-5.1146		-30.3615	-4.27291
	-30.2148	-5.03056		-30.2852	-3.83066		-30.1352	-5.02047		-30.2087	-4.07344		-30.1707	-4.76455		-30.2646	-5.07014		-30.1855	-4.27043
	-30.039	-4.9983		-30.1093	-3.78228		-29.9593	-4.97461		-30.0327	-4.15581		-29.9949	-4.7289		-30.0885	-5.0747		-30.0097	-4.28284
	-29.8632	-4.95325		-29.9333	-3.74934		-29.7833	-4.96048		-29.8566	-4.37062		-29.8191	-4.70964		-29.9124	-5.06541		-29.8337	-4.28845
	-29.6875	-4.91754		-29.7574	-3.71996		-29.6073	-4.94516		-29.6806	-4.2448		-29.6432	-4.70113		-29.7364	-5.0266		-29.6578	-4.29686
	-29.5117	-4.92224		-29.5815	-3.69603		-29.4313	-4.92347		-29.5046	-4.37455		-29.4674	-4.69962		-29.5603	-4.97516		-29.4819	-4.27341
	-29.3359	-4.90079		-29.4055	-3.69462		-29.2554	-4.89651		-29.3285	-3.93369		-29.2916	-4.67994		-29.3842	-4.95153		-29.306	-4.27135
	-29.1601	-4.89537		-29.2296	-3.66714		-29.0794	-4.83141		-29.1525	-4.06768		-29.1158	-4.6488		-29.2082	-4.92379		-29.1301	-4.26839
	-28.9843	-4.87825		-29.0537	-3.64377		-28.9034	-4.78435		-28.9764	-4.2072		-28.94	-4.62125		-29.0321	-4.91003		-28.9542	-4.27463
	-28.8086	-4.85019		-28.8777	-3.58039		-28.7274	-4.78337		-28.8004	-4.05062		-28.7642	-4.59038		-28.856	-4.90461		-28.7783	-4.28382
	-28.6328	-4.81289		-28.7018	-3.55488		-28.5514	-4.7822		-28.6244	-4.34306		-28.5883	-4.5642		-28.68	-4.90041		-28.6024	-4.28262
	-28.457	-4.78449		-28.5259	-3.55213		-28.3755	-4.76961		-28.4483	-4.31811		-28.4125	-4.53759		-28.5039	-4.86255		-28.4265	-4.28818
	-28.2812	-4.76827		-28.35	-3.52428		-28.1995	-4.72781		-28.2723	-4.40077		-28.2367	-4.50745		-28.3278	-4.8565		-28.2506	-4.29981
	-28.1054	-4.76635		-28.174	-3.49349		-28.0235	-4.70509		-28.0963	-4.47705		-28.0609	-4.48614		-28.1518	-4.84585		-28.0747	-4.32026
	-27.9296	-4.71918		-27.9981	-3.45729		-27.8475	-4.67318		-27.9202	-4.23663		-27.8851	-4.47788		-27.9757	-4.80068		-27.8988	-4.34743
	-27.7538	-4.67871		-27.8222	-3.45116		-27.6716	-4.62224		-27.7442	-4.03577		-27.7092	-4.4782		-27.7996	-4.75462		-27.7229	-4.35166
	-27.5781	-4.67492		-27.6462	-3.42488		-27.4956	-4.58306		-27.5682	-3.98999		-27.5334	-4.45912		-27.6236	-4.73248		-27.547	-4.36523
	-27.4023	-4.67865		-27.4703	-3.40037		-27.3196	-4.58773		-27.3921	-4.02319		-27.3576	-4.42105		-27.4475	-4.71745		-27.3711	-4.36668
	-27.2265	-4.65632		-27.2944	-3.38634		-27.1436	-4.55921		-27.2161	-4.0325		-27.1818	-4.38547		-27.2715	-4.72148		-27.1952	-4.35422
	-27.0507	-4.64167		-27.1185	-3.32316		-26.9676	-4.52337		-27.0401	-3.92481		-27.006	-4.35873		-27.0954	-4.68999		-27.0193	-4.38238
	-26.8749	-4.59811		-26.9425	-3.30722		-26.7917	-4.49753		-26.864	-3.84133		-26.8301	-4.34302		-26.9193	-4.65569		-26.8434	-4.43233
	-26.6992	-4.57199		-26.7666	-3.28709		-26.6157	-4.47628		-26.688	-3.81677		-26.6543	-4.33568		-26.7433	-4.64464		-26.6675	-4.56808
	-26.5234	-4.57248		-26.5907	-3.25376		-26.4397	-4.4378		-26.5119	-3.71424		-26.4785	-4.32454		-26.5672	-4.6492		-26.4916	-4.67435
	-26.3476	-4.57107		-26.4147	-3.24373		-26.2637	-4.44291		-26.3359	-3.73264		-26.3027	-4.29753		-26.3911	-4.66005		-26.3157	-4.7285
	-26.1718	-4.54583		-26.2388	-3.21493		-26.0878	-4.3947		-26.1599	-3.82503		-26.1269	-4.27877		-26.2151	-4.61908		-26.1398	-4.76277
	-25.996	-4.51565		-26.0629	-3.18284		-25.9118	-4.38265		-25.9838	-3.71016		-25.9511	-4.2772		-26.039	-4.59151		-25.9639	-4.80565
	-25.8203	-4.47769		-25.8869	-3.15462		-25.7358	-4.34203		-25.8078	-3.90389		-25.7752	-4.2601		-25.8629	-4.56212		-25.788	-4.77517
	-25.6445	-4.46604		-25.711	-3.13557		-25.5598	-4.2987		-25.6318	-4.09013		-25.5994	-4.21936		-25.6869	-4.5246		-25.6121	-4.7267
	-25.4687	-4.44602		-25.5351	-3.11429		-25.3838	-4.24603		-25.4557	-3.89574		-25.4236	-4.20104		-25.5108	-4.50909		-25.4362	-4.69262
	-25.2929	-4.42575		-25.3592	-3.09109		-25.2079	-4.2638		-25.2797	-3.66769		-25.2478	-4.18076		-25.3347	-4.50805		-25.2602	-4.64984
	-25.1171	-4.41363		-25.1832	-3.06341		-25.0319	-4.24986		-25.1036	-3.77652		-25.072	-4.14448		-25.1587	-4.49742		-25.0843	-4.63709
	-24.9413	-4.39225		-25.0073	-3.03485		-24.8559	-4.23402		-24.9276	-3.55449		-24.8961	-4.13591		-24.9826	-4.45891		-24.9084	-4.61762
	-24.7656	-4.35834		-24.8314	-3.02253		-24.6799	-4.15994		-24.7516	-3.52392		-24.7203	-4.13892		-24.8065	-4.42333		-24.7325	-4.62913
	-24.5898	-4.34555		-24.6554	-3.00853		-24.504	-4.10479		-24.5755	-3.49828		-24.5445	-4.13001		-24.6305	-4.40472		-24.5566	-4.63421
	-24.414	-4.33121		-24.4795	-2.95377		-24.328	-4.1088		-24.3995	-3.3027		-24.3687	-4.12298		-24.4544	-4.38925		-24.3807	-4.64707
	-24.2382	-4.31615		-24.3036	-2.93142		-24.152	-4.09976		-24.2235	-3.40334		-24.1929	-4.08457		-24.2783	-4.34235		-24.2048	-4.646
	-24.0624	-4.32172		-24.1277	-2.92723		-23.976	-4.08253		-24.0474	-3.34815		-24.0171	-4.05315		-24.1023	-4.34856		-24.0289	-4.62769
	-23.8866	-4.31006		-23.9517	-2.90164		-23.8	-4.04839		-23.8714	-3.35203		-23.8412	-4.01944		-23.9262	-4.34698		-23.853	-4.63136
	-23.7109	-4.28656		-23.7758	-2.8842		-23.6241	-4.02867		-23.6954	-3.56597		-23.6654	-4.00059		-23.7502	-4.34107		-23.6771	-4.62998
	-23.5351	-4.23784		-23.5999	-2.82294		-23.4481	-3.97473		-23.5193	-3.28944		-23.4896	-3.97917		-23.5741	-4.30458		-23.5012	-4.6401
	-23.3593	-4.19656		-23.4239	-2.7838		-23.2721	-3.95057		-23.3433	-3.08907		-23.3138	-3.9555		-23.398	-4.29357		-23.3253	-4.6289
	-23.1835	-4.17652		-23.248	-2.77799		-23.0961	-3.96036		-23.1672	-3.41522		-23.138	-3.9529		-23.222	-4.26851		-23.1494	-4.62962
	-23.0077	-4.17895		-23.0721	-2.77507		-22.9202	-3.90651		-22.9912	-3.48165		-22.9622	-3.95235		-23.0459	-4.2327		-22.9735	-4.6382
	-22.8319	-4.16898		-22.8961	-2.74458		-22.7442	-3.89307		-22.8152	-3.25197		-22.7863	-3.94233		-22.8698	-4.22162		-22.7976	-4.63343
	-22.6562	-4.13475		-22.7202	-2.69827		-22.5682	-3.87011		-22.6391	-3.28247		-22.6105	-3.90898		-22.6938	-4.1784		-22.6217	-4.62756
	-22.4804	-4.10428		-22.5443	-2.68171		-22.3922	-3.80935		-22.4631	-2.96642		-22.4347	-3.8686		-22.5177	-4.14149		-22.4458	-4.62812
	-22.3046	-4.08408		-22.3684	-2.66441		-22.2162	-3.79066		-22.2871	-3.09145		-22.2589	-3.8341		-22.3416	-4.12961		-22.2699	-4.62498
	-22.1288	-4.06727		-22.1924	-2.63216		-22.0403	-3.76904		-22.111	-3.16178		-22.0831	-3.80628		-22.1656	-4.10175		-22.094	-4.63029
	-21.953	-4.05654		-22.0165	-2.60287		-21.8643	-3.74669		-21.935	-3.0874		-21.9072	-3.78555		-21.9895	-4.07258		-21.9181	-4.62787
	-21.7772	-4.04089		-21.8406	-2.58469		-21.6883	-3.751		-21.7589	-2.9967		-21.7314	-3.77887		-21.8134	-4.06676		-21.7422	-4.60863
	-21.6015	-4.03038		-21.6647	-2.53872		-21.5123	-3.73697		-21.5829	-3.15612		-21.5556	-3.77906		-21.6374	-4.04213		-21.5663	-4.59192
	-21.4257	-3.98858		-21.4887	-2.51396		-21.3364	-3.674		-21.4069	-3.02056		-21.3798	-3.76659		-21.4613	-4.03423		-21.3904	-4.56568
	-21.2499	-3.94864		-21.3128	-2.51177		-21.1604	-3.62885		-21.2308	-3.13769		-21.204	-3.71283		-21.2852	-4.02979		-21.2145	-4.4623
	-21.0741	-3.91904		-21.1369	-2.47689		-20.9844	-3.61762		-21.0548	-3.45016		-21.0282	-3.6666		-21.1092	-3.99731		-21.0386	-4.09023
	-20.8983	-3.91036		-20.9609	-2.4419		-20.8084	-3.63513		-20.8788	-3.23436		-20.8523	-3.64567		-20.9331	-3.95733		-20.8627	-3.9093
	-20.7226	-3.90805		-20.785	-2.4156		-20.6324	-3.61143		-20.7027	-3.18363		-20.6765	-3.63794		-20.757	-3.93768		-20.6867	-3.84878
	-20.5468	-3.88088		-20.6091	-2.39584		-20.4565	-3.56606		-20.5267	-2.95684		-20.5007	-3.60492		-20.581	-3.92259		-20.5109	-3.76231
	-20.371	-3.85028		-20.4331	-2.37948		-20.2805	-3.53868		-20.3507	-2.9326		-20.3249	-3.56433		-20.4049	-3.88608		-20.3349	-3.84059
	-20.1952	-3.81564		-20.2572	-2.35926		-20.1045	-3.50391		-20.1746	-2.87885		-20.149	-3.55869		-20.2289	-3.8415		-20.159	-4.06662
	-20.0194	-3.79525		-20.0813	-2.33706		-19.9285	-3.50232		-19.9986	-2.92727		-19.9732	-3.54883		-20.0528	-3.81002		-19.9831	-4.14098
	-19.8437	-3.7668		-19.9053	-2.29149		-19.7526	-3.48285		-19.8225	-3.12936		-19.7974	-3.50971		-19.8767	-3.76633		-19.8072	-4.00365
	-19.6679	-3.75718		-19.7294	-2.27095		-19.5766	-3.43249		-19.6465	-3.13842		-19.6216	-3.47622		-19.7007	-3.74403		-19.6313	-3.77182
	-19.4921	-3.72096		-19.5535	-2.2302		-19.4006	-3.38494		-19.4705	-2.65845		-19.4458	-3.43556		-19.5246	-3.73965		-19.4554	-3.8338
	-19.3163	-3.69639		-19.3776	-2.22141		-19.2246	-3.35777		-19.2944	-2.78098		-19.27	-3.38741		-19.3485	-3.70258		-19.2795	-3.75788
	-19.1405	-3.68174		-19.2016	-2.19815		-19.0486	-3.35966		-19.1184	-2.66203		-19.0941	-3.36284		-19.1725	-3.65648		-19.1036	-3.8145
	-18.9647	-3.65103		-19.0257	-2.19436		-18.8727	-3.35519		-18.9424	-2.77952		-18.9183	-3.32824		-18.9964	-3.63522		-18.9277	-3.86568
	-18.7889	-3.6212		-18.8498	-2.15764		-18.6967	-3.31321		-18.7663	-2.96091		-18.7425	-3.29881		-18.8203	-3.61055		-18.7518	-3.45481
	-18.6132	-3.57594		-18.6739	-2.10854		-18.5207	-3.28466		-18.5903	-2.91366		-18.5667	-3.26372		-18.6443	-3.55565		-18.5759	-3.51797
	-18.4374	-3.52586		-18.4979	-2.08457		-18.3447	-3.25112		-18.4142	-2.91405		-18.3909	-3.23012		-18.4682	-3.51796		-18.4	-3.34605
	-18.2616	-3.5011		-18.322	-2.04783		-18.1687	-3.22714		-18.2382	-2.97254		-18.2151	-3.19015		-18.2921	-3.47057		-18.2241	-3.45188
	-18.0858	-3.47194		-18.1461	-2.03081		-17.9928	-3.19057		-18.0622	-2.62831		-18.0392	-3.16417		-18.1161	-3.4551		-18.0482	-2.90752
	-17.91	-3.44562		-17.9701	-2.04449		-17.8168	-3.17994		-17.8861	-2.74899		-17.8634	-3.12864		-17.94	-3.4247		-17.8723	-3.14068
	-17.7343	-3.41672		-17.7942	-2.00286		-17.6408	-3.13835		-17.7101	-2.40525		-17.6876	-3.08776		-17.7639	-3.38563		-17.6964	-3.33932
	-17.5585	-3.3937		-17.6183	-2.00492		-17.4648	-3.09438		-17.5341	-2.60534		-17.5118	-3.0739		-17.5879	-3.33636		-17.5205	-3.69366
	-17.3827	-3.36551		-17.4423	-1.91745		-17.2889	-3.11698		-17.358	-3.00101		-17.336	-3.05623		-17.4118	-3.31151		-17.3446	-3.21568
	-17.2069	-3.32777		-17.2664	-1.91056		-17.1129	-3.06394		-17.182	-2.71627		-17.1601	-3.01838		-17.2357	-3.28379		-17.1687	-2.87481
	-17.0311	-3.30728		-17.0905	-1.89652		-16.9369	-3.01349		-17.0059	-2.86434		-16.9843	-2.95835		-17.0597	-3.24599		-16.9928	-3.15365
	-16.8554	-3.28946		-16.9145	-1.87002		-16.7609	-2.9804		-16.8299	-2.84153		-16.8085	-2.92299		-16.8836	-3.18807		-16.8169	-2.78431
	-16.6796	-3.23884		-16.7386	-1.83005		-16.5849	-2.94368		-16.6539	-2.62108		-16.6327	-2.90718		-16.7076	-3.14432		-16.641	-2.2723
	-16.5038	-3.20545		-16.5627	-1.83119		-16.409	-2.95695		-16.4778	-2.47814		-16.4569	-2.9051		-16.5315	-3.17959		-16.4651	-2.39153
	-16.328	-3.16773		-16.3868	-1.78915		-16.233	-2.93107		-16.3018	-2.62959		-16.2811	-2.86529		-16.3554	-3.16011		-16.2892	-2.84833
	-16.1522	-3.12695		-16.2108	-1.74755		-16.057	-2.89559		-16.1258	-2.43914		-16.1052	-2.8263		-16.1793	-3.09801		-16.1133	-2.31667
	-15.9764	-3.10413		-16.0349	-1.69564		-15.881	-2.85866		-15.9497	-2.38657		-15.9294	-2.77025		-16.0033	-3.05067		-15.9374	-2.19563
	-15.8006	-3.07199		-15.859	-1.69092		-15.7051	-2.82543		-15.7737	-2.37558		-15.7536	-2.75665		-15.8272	-3.01486		-15.7614	-2.50167
	-15.6249	-3.06384		-15.683	-1.6764		-15.5291	-2.82897		-15.5977	-2.25005		-15.5778	-2.71439		-15.6512	-2.97742		-15.5855	-2.09476
	-15.4491	-2.99796		-15.5071	-1.67997		-15.3531	-2.77031		-15.4216	-2.25408		-15.402	-2.69525		-15.4751	-2.91076		-15.4096	-1.98077
	-15.2733	-2.94773		-15.3312	-1.63008		-15.1771	-2.76948		-15.2456	-2.23112		-15.2261	-2.66128		-15.299	-2.88446		-15.2337	-2.11439
	-15.0975	-2.91937		-15.1553	-1.59301		-15.0012	-2.70089		-15.0695	-2.53035		-15.0503	-2.60587		-15.123	-2.86083		-15.0578	-2.07002
	-14.9217	-2.89311		-14.9793	-1.57773		-14.8252	-2.70382		-14.8935	-2.4113		-14.8745	-2.59681		-14.9469	-2.81615		-14.8819	-2.15894
	-14.746	-2.84175		-14.8034	-1.55617		-14.6492	-2.72501		-14.7175	-1.69032		-14.6987	-2.54481		-14.7708	-2.76497		-14.706	-2.11631
	-14.5702	-2.82847		-14.6275	-1.53201		-14.4732	-2.65998		-14.5414	-1.25946		-14.5229	-2.50468		-14.5948	-2.73361		-14.5301	-2.04588
	-14.3944	-2.81793		-14.4515	-1.51769		-14.2972	-2.6315		-14.3654	-1.66588		-14.347	-2.47843		-14.4187	-2.677		-14.3542	-2.07499
	-14.2186	-2.76952		-14.2756	-1.48013		-14.1213	-2.58607		-14.1894	-1.69792		-14.1712	-2.45848		-14.2426	-2.63805		-14.1783	-2.05186
	-14.0428	-2.72096		-14.0997	-1.45258		-13.9453	-2.55367		-14.0133	-2.15994		-13.9954	-2.41664		-14.0666	-2.63838		-14.0024	-2.09261
	-13.8671	-2.70258		-13.9238	-1.43377		-13.7693	-2.56057		-13.8373	-2.24703		-13.8196	-2.38391		-13.8905	-2.60432		-13.8265	-2.00075
	-13.6913	-2.65546		-13.7478	-1.41557		-13.5933	-2.56425		-13.6613	-2.35647		-13.6438	-2.34158		-13.7144	-2.53176		-13.6506	-2.03691
	-13.5155	-2.63462		-13.5719	-1.37807		-13.4174	-2.52943		-13.4852	-2.10526		-13.468	-2.2932		-13.5384	-2.50326		-13.4747	-2.06177
	-13.3397	-2.58685		-13.396	-1.36613		-13.2414	-2.47461		-13.3092	-2.03988		-13.2921	-2.28889		-13.3623	-2.49374		-13.2988	-1.96835
	-13.1639	-2.55839		-13.22	-1.34871		-13.0654	-2.43276		-13.1331	-2.11489		-13.1163	-2.26737		-13.1862	-2.45172		-13.1229	-1.92548
	-12.9881	-2.53227		-13.0441	-1.3043		-12.8894	-2.40558		-12.9571	-1.6908		-12.9405	-2.21702		-13.0102	-2.38704		-12.947	-1.93127
	-12.8124	-2.48522		-12.8682	-1.2734		-12.7134	-2.39928		-12.7811	-1.64784		-12.7647	-2.1662		-12.8341	-2.37975		-12.7711	-1.89047
	-12.6366	-2.46524		-12.6922	-1.24387		-12.5375	-2.40288		-12.605	-1.62403		-12.5889	-2.16136		-12.658	-2.33634		-12.5952	-1.8658
	-12.4608	-2.44293		-12.5163	-1.23389		-12.3615	-2.36167		-12.429	-1.61896		-12.4131	-2.13103		-12.482	-2.28832		-12.4193	-1.84322
	-12.285	-2.39951		-12.3404	-1.21359		-12.1855	-2.32478		-12.253	-1.56843		-12.2372	-2.089		-12.3059	-2.24107		-12.2434	-1.78865
	-12.1092	-2.35741		-12.1645	-1.18391		-12.0095	-2.28772		-12.0769	-1.55619		-12.0614	-2.04538		-12.1299	-2.23311		-12.0675	-1.77112
	-11.9334	-2.31356		-11.9885	-1.15355		-11.8336	-2.25275		-11.9009	-1.63269		-11.8856	-2.00303		-11.9538	-2.15521		-11.8916	-1.76733
	-11.7577	-2.28568		-11.8126	-1.12198		-11.6576	-2.23149		-11.7248	-1.66872		-11.7098	-1.9814		-11.7777	-2.10912		-11.7157	-1.73112
	-11.5819	-2.22789		-11.6367	-1.0913		-11.4816	-2.19205		-11.5488	-1.80385		-11.534	-1.93051		-11.6017	-2.08577		-11.5398	-1.67006
	-11.4061	-2.2387		-11.4607	-1.06877		-11.3056	-2.15999		-11.3728	-1.90982		-11.3581	-1.90377		-11.4256	-2.03212		-11.3639	-1.64885
	-11.2303	-2.20843		-11.2848	-1.04031		-11.1296	-2.15922		-11.1967	-1.98051		-11.1823	-1.8832		-11.2495	-2.01096		-11.188	-1.58839
	-11.0545	-2.15603		-11.1089	-1.0203		-10.9537	-2.14483		-11.0207	-1.81942		-11.0065	-1.85878		-11.0735	-1.99027		-11.0121	-1.53323
	-10.8788	-2.11388		-10.9329	-0.98732		-10.7777	-2.11496		-10.8447	-1.55915		-10.8307	-1.86433		-10.8974	-1.96315		-10.8361	-1.48191
	-10.703	-2.08401		-10.757	-0.94605		-10.6017	-2.06013		-10.6686	-1.4385		-10.6549	-1.8117		-10.7213	-1.93834		-10.6602	-1.39559
	-10.5272	-2.07363		-10.5811	-0.94243		-10.4257	-2.02302		-10.4926	-1.4169		-10.4791	-1.77991		-10.5453	-1.90652		-10.4843	-1.38351
	-10.3514	-2.02658		-10.4052	-0.96835		-10.2498	-2.02426		-10.3166	-1.42974		-10.3032	-1.7601		-10.3692	-1.89578		-10.3084	-1.44252
	-10.1756	-1.9731		-10.2292	-0.96864		-10.0738	-2.02373		-10.1405	-1.42555		-10.1274	-1.73195		-10.1931	-1.81429		-10.1325	-1.47914
	-9.99983	-1.96216		-10.0533	-0.96489		-9.89779	-1.99295		-9.96448	-1.40147		-9.95159	-1.69713		-10.0171	-1.75215		-9.95663	-1.58127
	-9.82405	-1.8997		-9.87737	-0.96847		-9.72181	-1.95289		-9.78845	-1.40718		-9.77578	-1.66892		-9.84101	-1.72746		-9.78073	-1.65619
	-9.64827	-1.89179		-9.70145	-0.95		-9.54584	-1.90681		-9.61241	-1.40725		-9.59996	-1.62473		-9.66495	-1.69889		-9.60482	-1.6873
	-9.47249	-1.87809		-9.52552	-0.93769		-9.36986	-1.87628		-9.43637	-1.40731		-9.42414	-1.57968		-9.48888	-1.68376		-9.42892	-1.62429
	-9.2967	-1.85208		-9.34959	-0.92176		-9.19388	-1.85814		-9.26034	-1.40717		-9.24832	-1.55902		-9.31282	-1.6567		-9.25302	-1.50265
	-9.12092	-1.81889		-9.17366	-0.86868		-9.0179	-1.83731		-9.0843	-1.40928		-9.0725	-1.55533		-9.13675	-1.62258		-9.07711	-1.33193
	-8.94514	-1.78502		-8.99773	-0.81311		-8.84193	-1.81818		-8.90826	-1.39748		-8.89668	-1.53809		-8.96069	-1.61298		-8.90121	-1.20723
	-8.76936	-1.73804		-8.8218	-0.79374		-8.66595	-1.79491		-8.73222	-1.4096		-8.72087	-1.49283		-8.78462	-1.5956		-8.7253	-1.18737
	-8.59357	-1.69959		-8.64587	-0.76076		-8.48997	-1.75236		-8.55619	-1.41191		-8.54505	-1.44827		-8.60856	-1.55084		-8.5494	-1.19313
	-8.41779	-1.68199		-8.46994	-0.74639		-8.31399	-1.72037		-8.38015	-1.41137		-8.36923	-1.42137		-8.43249	-1.49907		-8.3735	-1.1924
	-8.24201	-1.67538		-8.29401	-0.70497		-8.13801	-1.74458		-8.20411	-1.40963		-8.19341	-1.39762		-8.25643	-1.43485		-8.19759	-1.20267
	-8.06623	-1.64206		-8.11808	-0.69477		-7.96204	-1.73025		-8.02808	-1.41297		-8.01759	-1.36518		-8.08036	-1.4007		-8.02169	-1.20374
	-7.89045	-1.57635		-7.94215	-0.67416		-7.78606	-1.70103		-7.85204	-1.41593		-7.84177	-1.32232		-7.9043	-1.34172		-7.84579	-1.19548
	-7.71466	-1.55724		-7.76622	-0.66581		-7.61008	-1.67232		-7.676	-1.42226		-7.66596	-1.31154		-7.72823	-1.34802		-7.66988	-1.20448
	-7.53888	-1.538		-7.59029	-0.65157		-7.4341	-1.64654		-7.49997	-1.4229		-7.49014	-1.27945		-7.55217	-1.36315		-7.49398	-1.20506
	-7.3631	-1.54469		-7.41436	-0.66547		-7.25812	-1.5937		-7.32393	-1.40412		-7.31432	-1.24504		-7.3761	-1.35104		-7.31807	-1.19948
	-7.18732	-1.47539		-7.23843	-0.67242		-7.08215	-1.50352		-7.14789	-1.38735		-7.1385	-1.21764		-7.20004	-1.37398		-7.14217	-1.20969
	-7.01153	-1.43606		-7.0625	-0.69131		-6.90617	-1.43191		-6.97186	-1.37338		-6.96268	-1.19415		-7.02397	-1.49194		-6.96627	-1.20757
	-6.83575	-1.41454		-6.88657	-0.69955		-6.73019	-1.37529		-6.79582	-1.36726		-6.78686	-1.18536		-6.84791	-1.34527		-6.79036	-1.21259
	-6.65997	-1.38479		-6.71065	-0.68279		-6.55421	-1.34465		-6.61978	-1.35205		-6.61105	-1.16307		-6.67184	-1.1635		-6.61446	-1.21348
	-6.48419	-1.34874		-6.53472	-0.60523		-6.37823	-1.36185		-6.44375	-1.34239		-6.43523	-1.14654		-6.49578	-1.15514		-6.43856	-1.21553
	-6.3084	-1.32021		-6.35879	-0.4878		-6.20226	-1.41348		-6.26771	-1.31964		-6.25941	-1.10175		-6.31971	-1.15431		-6.26265	-1.21421
	-6.13262	-1.30916		-6.18286	-0.39781		-6.02628	-1.53949		-6.09167	-1.31282		-6.08359	-1.04412		-6.14365	-1.1613		-6.08675	-1.21302
	-5.95684	-1.28495		-6.00693	-0.39173		-5.8503	-1.63102		-5.91564	-1.30549		-5.90777	-1.03173		-5.96758	-1.16094		-5.91085	-1.21743
	-5.78106	-1.25367		-5.831	-0.37756		-5.67432	-1.61363		-5.7396	-1.30212		-5.73195	-0.99821		-5.79152	-1.15192		-5.73494	-1.21334
	-5.60527	-1.22953		-5.65507	-0.37078		-5.49834	-1.5416		-5.56356	-1.30393		-5.55614	-0.96386		-5.61545	-1.15731		-5.55904	-1.2123
	-5.42949	-1.20977		-5.47914	-0.35458		-5.32237	-1.39229		-5.38753	-1.27997		-5.38032	-0.94471		-5.43939	-1.16276		-5.38313	-1.2273
	-5.25371	-1.20212		-5.30321	-0.36648		-5.14639	-1.2258		-5.21149	-1.25129		-5.2045	-0.92226		-5.26332	-1.16949		-5.20723	-1.28517
	-5.07793	-1.20515		-5.12728	-0.37339		-4.97041	-1.1603		-5.03545	-1.2207		-5.02868	-0.91887		-5.08726	-1.17535		-5.03133	-1.38031
	-4.90214	-1.12046		-4.95135	-0.37166		-4.79443	-1.16198		-4.85942	-1.19596		-4.85286	-0.90731		-4.91119	-1.17755		-4.85542	-1.43631
	-4.72636	-1.05262		-4.77542	-0.37516		-4.61846	-1.15543		-4.68338	-1.16812		-4.67704	-0.87341		-4.73513	-1.17055		-4.67952	-1.4782
	-4.55058	-1.03265		-4.59949	-0.37344		-4.44248	-1.15859		-4.50734	-1.13563		-4.50123	-0.82685		-4.55906	-1.17496		-4.50362	-1.47498
	-4.3748	-1.03282		-4.42356	-0.36558		-4.2665	-1.15716		-4.33131	-1.11136		-4.32541	-0.77985		-4.38299	-1.18009		-4.32771	-1.45904
	-4.19902	-1.03729		-4.24763	-0.36679		-4.09052	-1.1504		-4.15527	-1.08993		-4.14959	-0.75684		-4.20693	-1.19239		-4.15181	-1.45731
	-4.02323	-1.05519		-4.0717	-0.35778		-3.91454	-1.15462		-3.97923	-1.06308		-3.97377	-0.74839		-4.03086	-1.20569		-3.97591	-1.4496
	-3.84745	-1.0752		-3.89577	-0.35853		-3.73857	-1.15543		-3.8032	-1.05687		-3.79795	-0.75206		-3.8548	-1.2066		-3.8	-1.43655
	-3.67167	-1.09071		-3.71984	-0.3544		-3.56259	-1.15271		-3.62716	-1.08946		-3.62213	-0.75707		-3.67873	-1.20936		-3.6241	-1.42572
	-3.49589	-1.08307		-3.54392	-0.35454		-3.38661	-1.15		-3.45112	-1.10624		-3.44632	-0.75553		-3.50267	-1.21236		-3.44819	-1.42569
	-3.3201	-1.09105		-3.36799	-0.35025		-3.21063	-1.15018		-3.27509	-1.12049		-3.2705	-0.76014		-3.3266	-1.21396		-3.27229	-1.42209
	-3.14432	-1.10067		-3.19206	-0.34528		-3.03465	-1.152		-3.09905	-1.14864		-3.09468	-0.76255		-3.15054	-1.22275		-3.09639	-1.41494
	-2.96854	-1.10459		-3.01613	-0.34944		-2.85868	-1.14883		-2.92301	-1.18154		-2.91886	-0.75189		-2.97447	-1.20879		-2.92048	-1.41436
	-2.79276	-1.10708		-2.8402	-0.34627		-2.6827	-1.15025		-2.74697	-1.20777		-2.74304	-0.74851		-2.79841	-1.21595		-2.74458	-1.40562
	-2.61697	-1.10855		-2.66427	-0.33598		-2.50672	-1.14933		-2.57094	-1.21129		-2.56722	-0.75071		-2.62234	-1.21801		-2.56868	-1.40858
	-2.44119	-1.1097		-2.48834	-0.33586		-2.33074	-1.15126		-2.3949	-1.20386		-2.39141	-0.74808		-2.44628	-1.2267		-2.39277	-1.39333
	-2.26541	-1.1178		-2.31241	-0.33532		-2.15476	-1.15367		-2.21886	-1.21889		-2.21559	-0.74736		-2.27021	-1.23139		-2.21687	-1.40598
	-2.08963	-1.126		-2.13648	-0.3256		-1.97879	-1.15039		-2.04283	-1.24745		-2.03977	-0.74483		-2.09415	-1.23665		-2.04097	-1.38974
	-1.91384	-1.14283		-1.96055	-0.3213		-1.80281	-1.15263		-1.86679	-1.25322		-1.86395	-0.73816		-1.91808	-1.24009		-1.86506	-1.39361
	-1.73806	-1.14657		-1.78462	-0.31765		-1.62683	-1.15477		-1.69075	-1.24757		-1.68813	-0.74494		-1.74202	-1.24502		-1.68916	-1.40417
	-1.56228	-1.15476		-1.60869	-0.31368		-1.45085	-1.15485		-1.51472	-1.24051		-1.51232	-0.74699		-1.56595	-1.25185		-1.51325	-1.39815
	-1.3865	-1.15921		-1.43276	-0.30891		-1.27487	-1.15722		-1.33868	-1.22627		-1.3365	-0.74657		-1.38989	-1.25696		-1.33735	-1.40594
	-1.21071	-1.15932		-1.25683	-0.29518		-1.0989	-1.15497		-1.16264	-1.21577		-1.16068	-0.74608		-1.21382	-1.26043		-1.16145	-1.39455
	-1.03493	-1.16434		-1.0809	-0.27351		-0.92292	-1.15494		-0.98661	-1.20798		-0.98486	-0.74869		-1.03776	-1.27058		-0.98554	-1.39404
	-0.85915	-1.17115		-0.90497	-0.26065		-0.74694	-1.15537		-0.81057	-1.2114		-0.80904	-0.74956		-0.86169	-1.2718		-0.80964	-1.3889
	-0.68337	-1.17423		-0.72904	-0.25684		-0.57096	-1.15546		-0.63453	-1.19744		-0.63322	-0.75304		-0.68563	-1.2575		-0.63374	-1.38827
	-0.50759	-1.17362		-0.55312	-0.24782		-0.39499	-1.15679		-0.4585	-1.1936		-0.45741	-0.74846		-0.50956	-1.25475		-0.45783	-1.38791
	-0.3318	-1.17354		-0.37719	-0.23684		-0.21901	-1.15727		-0.28246	-1.19642		-0.28159	-0.75065		-0.3335	-1.25321		-0.28193	-1.38159
	-0.15602	-1.17413		-0.20126	-0.22571		-0.04303	-1.15685		-0.10642	-1.18789		-0.10577	-0.7541		-0.15743	-1.24942		-0.10602	-1.38443
	0.01976	-1.17235		-0.02533	-0.21816		0.13295	-1.15476		0.06961	-1.19238		0.07005	-0.75301		0.01863	-1.25459		0.06988	-1.39097
	0.19554	-1.16383		0.1506	-0.21512		0.30893	-1.15338		0.24565	-1.18524		0.24587	-0.75276		0.1947	-1.25738		0.24578	-1.39346
	0.37133	-1.16392		0.32653	-0.20824		0.4849	-1.15533		0.42169	-1.18066		0.42169	-0.74975		0.37076	-1.25501		0.42169	-1.38355
	0.54711	-1.14514		0.50246	-0.20599		0.66088	-1.1558		0.59772	-1.17154		0.5975	-0.75039		0.54683	-1.2509		0.59759	-1.39394
	0.72289	-1.14394		0.67839	-0.20583		0.83686	-1.15741		0.77376	-1.17758		0.77332	-0.75099		0.72289	-1.25208		0.77349	-1.3822
	0.89867	-1.14617		0.85432	-0.20015		1.01284	-1.15389		0.9498	-1.1831		0.94914	-0.74907		0.89896	-1.25593		0.9494	-1.3882
	1.07446	-1.14537		1.03025	-0.20542		1.18882	-1.15239		1.12583	-1.19058		1.12496	-0.74912		1.07502	-1.25059		1.1253	-1.38994
	1.25024	-1.14013		1.20618	-0.21056		1.36479	-1.15567		1.30187	-1.19709		1.30078	-0.74845		1.25109	-1.24672		1.3012	-1.39774
	1.42602	-1.13369		1.38211	-0.20373		1.54077	-1.15703		1.47791	-1.20471		1.4766	-0.75432		1.42715	-1.24787		1.47711	-1.38245
	1.6018	-1.12709		1.55804	-0.20877		1.71675	-1.15873		1.65394	-1.1987		1.65241	-0.75009		1.60322	-1.2474		1.65301	-1.38419
	1.77759	-1.13096		1.73397	-0.20571		1.89273	-1.15801		1.82998	-1.20021		1.82823	-0.7431		1.77928	-1.25282		1.82892	-1.39209
	1.95337	-1.14187		1.9099	-0.20824		2.06871	-1.15527		2.00602	-1.19559		2.00405	-0.75275		1.95535	-1.25066		2.00482	-1.38438
	2.12915	-1.1369		2.08583	-0.20372		2.24468	-1.15636		2.18205	-1.20355		2.17987	-0.75227		2.13141	-1.24659		2.18072	-1.37658
	2.30493	-1.13526		2.26176	-0.20662		2.42066	-1.15506		2.35809	-1.20637		2.35569	-0.74533		2.30748	-1.23968		2.35663	-1.38164
	2.48071	-1.13677		2.43768	-0.21185		2.59664	-1.15226		2.53413	-1.17976		2.53151	-0.76149		2.48354	-1.23996		2.53253	-1.38668
	2.6565	-1.13846		2.61361	-0.21182		2.77262	-1.15482		2.71016	-1.17708		2.70732	-0.74681		2.65961	-1.23642		2.70843	-1.38632
	2.83228	-1.13516		2.78954	-0.21835		2.94859	-1.15616		2.8862	-1.15182		2.88314	-0.74733		2.83567	-1.2239		2.88434	-1.39053
	3.00806	-1.13395		2.96547	-0.2167		3.12457	-1.15359		3.06224	-1.14073		3.05896	-0.75047		3.01174	-1.21733		3.06024	-1.38726
	3.18384	-1.12335		3.1414	-0.22088		3.30055	-1.15281		3.23828	-1.10954		3.23478	-0.75061		3.1878	-1.21942		3.23614	-1.39298
	3.35963	-1.11912		3.31733	-0.23687		3.47653	-1.15568		3.41431	-1.11157		3.4106	-0.75172		3.36387	-1.21233		3.41205	-1.39042
	3.53541	-1.1176		3.49326	-0.25241		3.65251	-1.15371		3.59035	-1.0987		3.58642	-0.75309		3.53993	-1.20925		3.58795	-1.40024
	3.71119	-1.11754		3.66919	-0.27128		3.82848	-1.15024		3.76639	-1.09189		3.76223	-0.75721		3.716	-1.20308		3.76386	-1.39395
	3.88697	-1.10186		3.84512	-0.29742		4.00446	-1.15098		3.94242	-1.11948		3.93805	-0.76013		3.89206	-1.20786		3.93976	-1.39632
	4.06276	-1.08828		4.02105	-0.31237		4.18044	-1.15209		4.11846	-1.15248		4.11387	-0.76372		4.06813	-1.20682		4.11566	-1.40447
	4.23854	-1.08393		4.19698	-0.32578		4.35642	-1.15284		4.2945	-1.17895		4.28969	-0.76066		4.24419	-1.21011		4.29157	-1.41135
	4.41432	-1.08407		4.37291	-0.347		4.5324	-1.15379		4.47053	-1.2202		4.46551	-0.76405		4.42026	-1.21241		4.46747	-1.42547
	4.5901	-1.08302		4.54884	-0.36039		4.70837	-1.15769		4.64657	-1.22428		4.64133	-0.78653		4.59632	-1.20267		4.64337	-1.44336
	4.76589	-1.08913		4.72477	-0.37725		4.88435	-1.16645		4.82261	-1.27042		4.81714	-0.80798		4.77239	-1.19281		4.81928	-1.43983
	4.94167	-1.09025		4.9007	-0.38875		5.06033	-1.17668		4.99864	-1.31555		4.99296	-0.81964		4.94845	-1.17645		4.99518	-1.42719
	5.11745	-1.10748		5.07663	-0.39511		5.23631	-1.1936		5.17468	-1.32623		5.16878	-0.84727		5.12452	-1.17376		5.17108	-1.4038
	5.29323	-1.12666		5.25256	-0.40257		5.41229	-1.21264		5.35072	-1.36666		5.3446	-0.8718		5.30058	-1.17821		5.34699	-1.34461
	5.46902	-1.14813		5.42848	-0.40096		5.58826	-1.23434		5.52675	-1.38638		5.52042	-0.92414		5.47665	-1.16507		5.52289	-1.27539
	5.6448	-1.1623		5.60441	-0.41462		5.76424	-1.27715		5.70279	-1.40728		5.69624	-0.98324		5.65271	-1.15805		5.6988	-1.19709
	5.82058	-1.18737		5.78034	-0.42789		5.94022	-1.40398		5.87883	-1.41078		5.87205	-1.02596		5.82878	-1.16922		5.8747	-1.18119
	5.99636	-1.22727		5.95627	-0.43337		6.1162	-1.63237		6.05486	-1.42423		6.04787	-1.08843		6.00484	-1.17303		6.0506	-1.16336
	6.17214	-1.28584		6.1322	-0.44391		6.29218	-1.79696		6.2309	-1.43152		6.22369	-1.08334		6.18091	-1.15778		6.22651	-1.18622
	6.34793	-1.35317		6.30813	-0.45811		6.46815	-1.85952		6.40694	-1.43974		6.39951	-1.09643		6.35697	-1.16529		6.40241	-1.19018
	6.52371	-1.39565		6.48406	-0.47552		6.64413	-1.87451		6.58297	-1.40882		6.57533	-1.08335		6.53304	-1.16927		6.57831	-1.20686
	6.69949	-1.39005		6.65999	-0.52772		6.82011	-1.73147		6.75901	-1.42548		6.75114	-1.11457		6.7091	-1.15175		6.75422	-1.19533
	6.87527	-1.39696		6.83592	-0.56293		6.99609	-1.51228		6.93505	-1.40861		6.92696	-1.14262		6.88517	-1.16958		6.93012	-1.20335
	7.05106	-1.42114		7.01185	-0.59333		7.17206	-1.40311		7.11108	-1.40039		7.10278	-1.15127		7.06123	-1.18813		7.10603	-1.21253
	7.22684	-1.44125		7.18778	-0.61835		7.34804	-1.39335		7.28712	-1.40914		7.2786	-1.18265		7.2373	-1.1968		7.28193	-1.21773
	7.40262	-1.46246		7.36371	-0.6284		7.52402	-1.42941		7.46316	-1.44155		7.45442	-1.20907		7.41336	-1.20838		7.45783	-1.22081
	7.5784	-1.4748		7.53964	-0.64603		7.7	-1.50246		7.63919	-1.42663		7.63024	-1.23546		7.58943	-1.21231		7.63374	-1.22762
	7.75419	-1.50472		7.71557	-0.65694		7.87598	-1.59735		7.81523	-1.4316		7.80605	-1.26171		7.76549	-1.24349		7.80964	-1.22673
	7.92997	-1.54895		7.8915	-0.66582		8.05195	-1.66397		7.99127	-1.41534		7.98187	-1.30782		7.94156	-1.25114		7.98554	-1.22627
	8.10575	-1.56591		8.06743	-0.67003		8.22793	-1.72487		8.1673	-1.43748		8.15769	-1.33477		8.11762	-1.29274		8.16145	-1.22631
	8.28153	-1.58521		8.24336	-0.68143		8.40391	-1.77032		8.34334	-1.42411		8.33351	-1.35051		8.29369	-1.35401		8.33735	-1.2296
	8.45732	-1.62254		8.41928	-0.68236		8.57989	-1.79322		8.51938	-1.42397		8.50933	-1.38348		8.46975	-1.53844		8.51325	-1.22354
	8.6331	-1.67204		8.59521	-0.67289		8.75587	-1.82681		8.69541	-1.44996		8.68515	-1.42865		8.64582	-1.8737		8.68916	-1.22425
	8.80888	-1.68673		8.77114	-0.67578		8.93184	-1.85529		8.87145	-1.43882		8.86096	-1.45981		8.82188	-1.93665		8.86506	-1.2276
	8.98466	-1.73187		8.94707	-0.68515		9.10782	-1.87645		9.04749	-1.4694		9.03678	-1.46587		8.99795	-1.59094		9.04097	-1.2193
	9.16045	-1.75696		9.123	-0.69985		9.2838	-1.90336		9.22353	-1.48961		9.2126	-1.48609		9.17402	-1.52848		9.21687	-1.23136
	9.33623	-1.77013		9.29893	-0.72318		9.45978	-1.91764		9.39956	-1.48874		9.38842	-1.51545		9.35008	-1.55313		9.39277	-1.24814
	9.51201	-1.80614		9.47486	-0.76042		9.63576	-1.92619		9.5756	-1.49969		9.56424	-1.55357		9.52615	-1.56316		9.56868	-1.32487
	9.68779	-1.8465		9.65079	-0.78716		9.81173	-1.94468		9.75164	-1.505		9.74006	-1.59271		9.70221	-1.60206		9.74458	-1.52047
	9.86357	-1.86782		9.82672	-0.8227		9.98771	-1.97029		9.92767	-1.57184		9.91587	-1.60492		9.87828	-1.66049		9.92048	-1.73343
	10.0394	-1.88569		10.0026	-0.86169		10.1637	-1.99992		10.1037	-1.71078		10.0917	-1.6411		10.0543	-1.68396		10.0964	-1.79749
	10.2151	-1.9193		10.1786	-0.89924		10.3397	-2.01022		10.2797	-1.91756		10.2675	-1.68053		10.2304	-1.73025		10.2723	-1.84496
	10.3909	-1.93865		10.3545	-0.9418		10.5157	-2.04326		10.4558	-1.8889		10.4433	-1.71125		10.4065	-1.79223		10.4482	-1.85272
	10.5667	-1.9688		10.5304	-0.98998		10.6916	-2.10222		10.6318	-1.84735		10.6191	-1.71856		10.5825	-1.84019		10.6241	-1.77415
	10.7425	-2.00442		10.7064	-1.0393		10.8676	-2.13841		10.8079	-1.66914		10.795	-1.74705		10.7586	-1.85291		10.8	-1.66003
	10.9183	-2.03576		10.8823	-1.08026		11.0436	-2.17232		10.9839	-1.45854		10.9708	-1.78737		10.9347	-1.88134		10.9759	-1.5274
	11.094	-2.07331		11.0582	-1.11038		11.2196	-2.19689		11.1599	-1.41624		11.1466	-1.79468		11.1107	-1.88066		11.1518	-1.46032
	11.2698	-2.09372		11.2342	-1.12331		11.3955	-2.21052		11.336	-1.44163		11.3224	-1.8286		11.2868	-1.94398		11.3277	-1.41554
	11.4456	-2.1273		11.4101	-1.11575		11.5715	-2.21082		11.512	-1.47034		11.4982	-1.85128		11.4629	-2.00121		11.5036	-1.50234
	11.6214	-2.16651		11.586	-1.11115		11.7475	-2.22801		11.688	-1.5113		11.6741	-1.89748		11.6389	-2.03995		11.6795	-1.57362
	11.7972	-2.17579		11.7619	-1.11693		11.9235	-2.26174		11.8641	-1.7965		11.8499	-1.9281		11.815	-2.08691		11.8554	-1.63318
	11.973	-2.19461		11.9379	-1.11019		12.0994	-2.30751		12.0401	-1.9514		12.0257	-1.95715		11.9911	-2.13931		12.0313	-1.69455
	12.1487	-2.25361		12.1138	-1.09773		12.2754	-2.33578		12.2162	-1.81222		12.2015	-1.98895		12.1671	-2.17407		12.2072	-1.75428
	12.3245	-2.2814		12.2897	-1.08169		12.4514	-2.35879		12.3922	-1.66744		12.3773	-2.02411		12.3432	-2.181		12.3831	-1.82567
	12.5003	-2.31674		12.4657	-1.09453		12.6274	-2.38115		12.5682	-1.67675		12.5532	-2.04701		12.5192	-2.19771		12.559	-1.86145
	12.6761	-2.33976		12.6416	-1.09524		12.8034	-2.39537		12.7443	-1.57624		12.729	-2.07217		12.6953	-2.25288		12.7349	-1.91423
	12.8519	-2.39141		12.8175	-1.12916		12.9793	-2.41747		12.9203	-1.63186		12.9048	-2.06378		12.8714	-2.25064		12.9108	-1.97766
	13.0277	-2.40857		12.9934	-1.18732		13.1553	-2.45131		13.0963	-1.81772		13.0806	-2.10915		13.0474	-2.31922		13.0868	-2.04263
	13.2034	-2.4311		13.1694	-1.19355		13.3313	-2.49683		13.2724	-1.75383		13.2564	-2.16617		13.2235	-2.37749		13.2627	-2.1207
	13.3792	-2.47235		13.3453	-1.23094		13.5073	-2.51109		13.4484	-1.8436		13.4322	-2.19791		13.3996	-2.38637		13.4386	-2.15723
	13.555	-2.52281		13.5212	-1.22631		13.6832	-2.52304		13.6244	-1.75502		13.6081	-2.22776		13.5756	-2.38823		13.6145	-2.15391
	13.7308	-2.53886		13.6972	-1.24799		13.8592	-2.54152		13.8005	-1.72344		13.7839	-2.26803		13.7517	-2.39907		13.7904	-2.28227
	13.9066	-2.57669		13.8731	-1.30945		14.0352	-2.54708		13.9765	-1.765		13.9597	-2.30466		13.9278	-2.43117		13.9663	-2.3172
	14.0823	-2.61029		14.049	-1.33483		14.2112	-2.57975		14.1525	-1.76285		14.1355	-2.32004		14.1038	-2.494		14.1422	-2.39359
	14.2581	-2.64816		14.225	-1.35664		14.3872	-2.64193		14.3286	-1.87985		14.3113	-2.35247		14.2799	-2.51133		14.3181	-2.45317
	14.4339	-2.6714		14.4009	-1.38064		14.5631	-2.67628		14.5046	-1.86854		14.4871	-2.39625		14.456	-2.52882		14.494	-2.3876
	14.6097	-2.70795		14.5768	-1.36363		14.7391	-2.69023		14.6807	-1.83595		14.663	-2.41439		14.632	-2.5646		14.6699	-2.58683
	14.7855	-2.7343		14.7527	-1.39342		14.9151	-2.68714		14.8567	-2.03056		14.8388	-2.44487		14.8081	-2.57264		14.8458	-2.4979
	14.9613	-2.78937		14.9287	-1.43426		15.0911	-2.70814		15.0327	-1.79308		15.0146	-2.47058		14.9842	-2.60764		15.0217	-2.67019
	15.1371	-2.79768		15.1046	-1.48557		15.267	-2.74697		15.2088	-1.90788		15.1904	-2.54192		15.1602	-2.63344		15.1976	-2.75283
	15.3128	-2.81596		15.2805	-1.5013		15.443	-2.76047		15.3848	-2.14197		15.3662	-2.53783		15.3363	-2.65081		15.3735	-2.82215
	15.4886	-2.87202		15.4565	-1.48482		15.619	-2.80149		15.5609	-2.10379		15.5421	-2.59035		15.5124	-2.67492		15.5494	-3.14469
	15.6644	-2.91302		15.6324	-1.49554		15.795	-2.82725		15.7369	-2.24146		15.7179	-2.6187		15.6884	-2.69911		15.7253	-3.23376
	15.8402	-2.94676		15.8083	-1.52475		15.971	-2.82663		15.9129	-2.26629		15.8937	-2.64902		15.8645	-2.7175		15.9012	-3.10219
	16.016	-2.9635		15.9842	-1.55271		16.1469	-2.85768		16.089	-2.12219		16.0695	-2.67838		16.0405	-2.75638		16.0771	-3.20589
	16.1917	-2.98517		16.1602	-1.61058		16.3229	-2.8879		16.265	-1.97582		16.2453	-2.71966		16.2166	-2.81494		16.253	-3.30513
	16.3675	-3.03641		16.3361	-1.6337		16.4989	-2.9161		16.441	-2.07932		16.4212	-2.74567		16.3927	-2.86061		16.4289	-3.01657
	16.5433	-3.06118		16.512	-1.63534		16.6749	-2.95948		16.6171	-2.1647		16.597	-2.78582		16.5688	-2.87698		16.6048	-3.0442
	16.7191	-3.11087		16.688	-1.6516		16.8509	-2.96944		16.7931	-2.29341		16.7728	-2.8163		16.7448	-2.90875		16.7807	-3.04331
	16.8949	-3.14109		16.8639	-1.69357		17.0268	-2.9932		16.9691	-2.31026		16.9486	-2.84033		16.9209	-2.95735		16.9566	-2.91812
	17.0707	-3.15597		17.0398	-1.70587		17.2028	-3.01898		17.1452	-2.29054		17.1244	-2.87153		17.0969	-2.97976		17.1325	-3.0565
	17.2464	-3.18055		17.2158	-1.72987		17.3788	-3.05293		17.3212	-2.27383		17.3002	-2.90257		17.273	-2.97505		17.3084	-3.59447
	17.4222	-3.22996		17.3917	-1.76072		17.5548	-3.08819		17.4973	-2.16684		17.4761	-2.93122		17.4491	-3.02413		17.4843	-3.41005
	17.598	-3.27145		17.5676	-1.78431		17.7307	-3.09895		17.6733	-1.9705		17.6519	-2.96078		17.6251	-3.07508		17.6602	-3.75777
	17.7738	-3.29707		17.7435	-1.79494		17.9067	-3.16068		17.8493	-2.07088		17.8277	-2.97256		17.8012	-3.09935		17.8361	-3.45572
	17.9496	-3.34149		17.9195	-1.82122		18.0827	-3.18237		18.0254	-2.36954		18.0035	-3.00317		17.9773	-3.12716		18.012	-3.3962
	18.1254	-3.36538		18.0954	-1.8335		18.2587	-3.18327		18.2014	-2.49055		18.1793	-3.05246		18.1533	-3.18355		18.188	-3.43162
	18.3011	-3.39153		18.2713	-1.85822		18.4347	-3.2304		18.3774	-2.465		18.3551	-3.08001		18.3294	-3.20726		18.3639	-3.46987
	18.4769	-3.40803		18.4473	-1.89912		18.6106	-3.2581		18.5535	-2.30657		18.531	-3.10539		18.5055	-3.23813		18.5398	-3.8215
	18.6527	-3.44593		18.6232	-1.93		18.7866	-3.26331		18.7295	-2.40926		18.7068	-3.1357		18.6815	-3.28627		18.7157	-3.95174
	18.8285	-3.48725		18.7991	-1.97181		18.9626	-3.29603		18.9056	-2.47038		18.8826	-3.16891		18.8576	-3.28928		18.8916	-3.67761
	19.0043	-3.53094		18.975	-1.99725		19.1386	-3.331		19.0816	-2.51052		19.0584	-3.20779		19.0337	-3.33143		19.0675	-3.43725
	19.18	-3.55866		19.151	-1.99739		19.3145	-3.34481		19.2576	-2.4376		19.2342	-3.23308		19.2097	-3.35878		19.2434	-3.90601
	19.3558	-3.59977		19.3269	-2.011		19.4905	-3.37116		19.4337	-2.49464		19.4101	-3.24329		19.3858	-3.39945		19.4193	-4.32656
	19.5316	-3.62436		19.5028	-2.04194		19.6665	-3.39012		19.6097	-2.64257		19.5859	-3.28179		19.5618	-3.42296		19.5952	-4.06503
	19.7074	-3.64964		19.6788	-2.0697		19.8425	-3.41612		19.7857	-2.46657		19.7617	-3.3045		19.7379	-3.45342		19.7711	-3.96172
	19.8832	-3.67073		19.8547	-2.09533		20.0185	-3.43538		19.9618	-2.48982		19.9375	-3.33579		19.914	-3.47207		19.947	-3.85474
	20.0589	-3.7085		20.0306	-2.12069		20.1944	-3.47224		20.1378	-2.59776		20.1133	-3.36289		20.0901	-3.50741		20.1229	-3.70264
	20.2347	-3.7261		20.2066	-2.13931		20.3704	-3.48758		20.3138	-2.59984		20.2891	-3.38506		20.2661	-3.54066		20.2988	-3.76644
	20.4105	-3.76406		20.3825	-2.1689		20.5464	-3.48841		20.4899	-2.50899		20.465	-3.40989		20.4422	-3.57199		20.4747	-4.1065
	20.5863	-3.81508		20.5584	-2.18115		20.7224	-3.52834		20.6659	-2.63967		20.6408	-3.46238		20.6182	-3.60181		20.6506	-4.15851
	20.7621	-3.85441		20.7343	-2.19351		20.8983	-3.58336		20.842	-2.67618		20.8166	-3.48158		20.7943	-3.62189		20.8265	-3.91
	20.9379	-3.86237		20.9103	-2.23085		21.0743	-3.61006		21.018	-2.52896		20.9924	-3.4969		20.9704	-3.64725		21.0024	-3.82456
	21.1136	-3.88913		21.0862	-2.26759		21.2503	-3.60892		21.194	-2.85792		21.1683	-3.52637		21.1464	-3.68244		21.1783	-3.87455
	21.2894	-3.91363		21.2621	-2.27662		21.4263	-3.60734		21.3701	-2.86264		21.3441	-3.55643		21.3225	-3.71318		21.3542	-3.93834
	21.4652	-3.92917		21.4381	-2.29415		21.6023	-3.65678		21.5461	-2.64549		21.5199	-3.57483		21.4986	-3.74181		21.5301	-4.06532
	21.641	-3.93741		21.614	-2.32403		21.7782	-3.71319		21.7221	-2.78945		21.6957	-3.58383		21.6746	-3.76697		21.706	-4.32433
	21.8168	-3.97683		21.7899	-2.35279		21.9542	-3.73968		21.8982	-2.86117		21.8715	-3.60586		21.8507	-3.79528		21.8819	-4.47938
	21.9926	-4.01472		21.9658	-2.38711		22.1302	-3.75195		22.0742	-2.81684		22.0473	-3.63697		22.0268	-3.81509		22.0578	-4.51808
	22.1683	-4.02546		22.1418	-2.39759		22.3062	-3.74328		22.2503	-2.75886		22.2232	-3.67695		22.2028	-3.84068		22.2337	-4.51625
	22.3441	-4.0648		22.3177	-2.41255		22.4821	-3.77966		22.4263	-2.82835		22.399	-3.71018		22.3789	-3.86524		22.4096	-4.50879
	22.5199	-4.09183		22.4936	-2.43844		22.6581	-3.83203		22.6023	-2.85771		22.5748	-3.72427		22.555	-3.88135		22.5856	-4.50077
	22.6957	-4.11949		22.6696	-2.4629		22.8341	-3.84482		22.7784	-2.82612		22.7506	-3.74423		22.731	-3.90595		22.7614	-4.48603
	22.8715	-4.12923		22.8455	-2.49399		23.0101	-3.87116		22.9544	-2.85544		22.9264	-3.77806		22.9071	-3.9197		22.9373	-4.47947
	23.0472	-4.16674		23.0214	-2.51746		23.1861	-3.90098		23.1304	-2.96769		23.1023	-3.79414		23.0832	-3.94331		23.1133	-4.4889
	23.223	-4.20449		23.1974	-2.52836		23.362	-3.91913		23.3065	-3.01287		23.2781	-3.80246		23.2592	-3.96343		23.2892	-4.49465
	23.3988	-4.20821		23.3733	-2.55428		23.538	-3.92283		23.4825	-2.84769		23.4539	-3.80951		23.4353	-3.98381		23.4651	-4.49469
	23.5746	-4.21975		23.5492	-2.57401		23.714	-3.96103		23.6585	-3.04995		23.6297	-3.83758		23.6114	-4.00572		23.641	-4.48932
	23.7504	-4.24679		23.7251	-2.57627		23.89	-3.99602		23.8346	-3.00348		23.8055	-3.87018		23.7874	-4.00626		23.8169	-4.49243
	23.9262	-4.27186		23.9011	-2.61412		24.0659	-4.01981		24.0106	-3.09639		23.9813	-3.87955		23.9635	-4.04215		23.9928	-4.4927
	24.1019	-4.2943		24.077	-2.63767		24.2419	-4.04429		24.1867	-3.01918		24.1572	-3.90158		24.1395	-4.07176		24.1687	-4.49397
	24.2777	-4.29492		24.2529	-2.66892		24.4179	-4.07919		24.3627	-3.12696		24.333	-3.93156		24.3156	-4.07137		24.3446	-4.49649
	24.4535	-4.31929		24.4289	-2.70078		24.5939	-4.08436		24.5387	-3.27504		24.5088	-3.93908		24.4917	-4.09873		24.5205	-4.49119
	24.6293	-4.37192		24.6048	-2.71545		24.7699	-4.07579		24.7148	-3.20944		24.6846	-3.96776		24.6677	-4.113		24.6964	-4.48125
	24.8051	-4.38921		24.7807	-2.73799		24.9458	-4.12069		24.8908	-2.95829		24.8604	-3.9935		24.8438	-4.10532		24.8723	-4.4792
	24.9809	-4.41845		24.9566	-2.75799		25.1218	-4.14946		25.0668	-3.16043		25.0362	-3.99566		25.0199	-4.13015		25.0482	-4.49823
	25.1566	-4.45678		25.1326	-2.78245		25.2978	-4.19361		25.2429	-3.21511		25.2121	-4.00505		25.1959	-4.16409		25.2241	-4.53218
	25.3324	-4.47193		25.3085	-2.82445		25.4738	-4.22333		25.4189	-3.15026		25.3879	-4.03102		25.372	-4.19028		25.4	-4.52567
	25.5082	-4.48375		25.4844	-2.83544		25.6498	-4.23288		25.5949	-3.15843		25.5637	-4.06264		25.5481	-4.18888		25.5759	-4.50857
	25.684	-4.48441		25.6604	-2.86484		25.8257	-4.22809		25.771	-3.12706		25.7395	-4.09472		25.7241	-4.19701		25.7518	-4.48078
	25.8598	-4.49465		25.8363	-2.8857		26.0017	-4.29262		25.947	-3.22827		25.9153	-4.10528		25.9002	-4.22574		25.9277	-4.47784
	26.0356	-4.51837		26.0122	-2.88449		26.1777	-4.34037		26.123	-3.22893		26.0912	-4.10163		26.0763	-4.24382		26.1036	-4.49
	26.2113	-4.54992		26.1882	-2.91732		26.3537	-4.3362		26.2991	-3.38835		26.267	-4.11269		26.2523	-4.26428		26.2795	-4.4416
	26.3871	-4.55333		26.3641	-2.95871		26.5296	-4.37371		26.4751	-3.41163		26.4428	-4.13211		26.4284	-4.29498		26.4554	-4.37189
	26.5629	-4.56365		26.54	-2.97949		26.7056	-4.37978		26.6512	-3.33351		26.6186	-4.15679		26.6045	-4.3037		26.6313	-4.37011
	26.7387	-4.58237		26.7159	-3.00241		26.8816	-4.39243		26.8272	-3.49153		26.7944	-4.18144		26.7805	-4.32658		26.8072	-4.45932
	26.9145	-4.61866		26.8919	-3.04459		27.0576	-4.43428		27.0032	-3.5072		26.9703	-4.20044		26.9566	-4.34484		26.9831	-4.42891
	27.0903	-4.63603		27.0678	-3.05733		27.2336	-4.48268		27.1793	-3.35434		27.1461	-4.22759		27.1327	-4.36174		27.159	-4.29765
	27.266	-4.65256		27.2437	-3.07469		27.4095	-4.48115		27.3553	-3.52648		27.3219	-4.23261		27.3087	-4.394		27.3349	-4.19309
	27.4418	-4.67878		27.4197	-3.09155		27.5855	-4.5241		27.5313	-3.60338		27.4977	-4.23613		27.4848	-4.43102		27.5109	-4.16867
	27.6176	-4.69478		27.5956	-3.11947		27.7615	-4.55163		27.7074	-3.39181		27.6735	-4.27016		27.6608	-4.43384		27.6867	-4.15106
	27.7934	-4.71178		27.7715	-3.14375		27.9375	-4.56032		27.8834	-3.51529		27.8493	-4.29691		27.8369	-4.46176		27.8627	-4.16067
	27.9692	-4.72716		27.9474	-3.17017		28.1134	-4.59876		28.0595	-3.77079		28.0252	-4.30946		28.013	-4.4899		28.0386	-4.17022
	28.1449	-4.77166		28.1234	-3.19231		28.2894	-4.62982		28.2355	-3.6818		28.201	-4.32761		28.189	-4.49652		28.2145	-4.17746
	28.3207	-4.78731		28.2993	-3.21551		28.4654	-4.65754		28.4115	-3.7097		28.3768	-4.32666		28.3651	-4.50811		28.3904	-4.17168
	28.4965	-4.79862		28.4752	-3.22594		28.6414	-4.68993		28.5876	-3.56863		28.5526	-4.35741		28.5412	-4.53389		28.5663	-4.16528
	28.6723	-4.80219		28.6512	-3.25189		28.8174	-4.70713		28.7636	-3.82854		28.7284	-4.37471		28.7172	-4.55896		28.7422	-4.18213
	28.8481	-4.82475		28.8271	-3.26698		28.9933	-4.72477		28.9396	-3.60429		28.9043	-4.39757		28.8933	-4.57438		28.9181	-4.18078
	29.0238	-4.85006		29.003	-3.29904		29.1693	-4.73136		29.1157	-4.07833		29.0801	-4.4153		29.0694	-4.60512		29.094	-4.18588
	29.1996	-4.87225		29.179	-3.35211		29.3453	-4.78553		29.2917	-3.74258		29.2559	-4.44091		29.2454	-4.62164		29.2699	-4.18006
	29.3754	-4.89264		29.3549	-3.3697		29.5213	-4.82057		29.4677	-3.11919		29.4317	-4.46183		29.4215	-4.63178		29.4458	-4.18298
	29.5512	-4.91916		29.5308	-3.36847		29.6972	-4.82548		29.6438	-3.44338		29.6075	-4.4795		29.5976	-4.64824		29.6217	-4.18227
	29.727	-4.93272		29.7067	-3.38429		29.8732	-4.83311		29.8198	-3.57842		29.7833	-4.49718		29.7736	-4.66278		29.7976	-4.17514
	29.9028	-4.95619		29.8827	-3.40062		30.0492	-4.85963		29.9959	-4.11717		29.9592	-4.53255		29.9497	-4.68639		29.9735	-4.17414
	30.0785	-4.98907		30.0586	-3.42927		30.2252	-4.86482		30.1719	-3.87653		30.135	-4.55718		30.1258	-4.71724		30.1494	-4.17632
	30.2543	-5.01084		30.2345	-3.48114		30.4012	-4.90994		30.3479	-3.87923		30.3108	-4.56891		30.3018	-4.74899		30.3253	-4.17742
	30.4301	-5.03263		30.4105	-3.5057		30.5771	-4.92288		30.524	-3.94712		30.4866	-4.58719		30.4779	-4.7704		30.5012	-4.17687
	30.6059	-5.06509		30.5864	-3.50884		30.7531	-4.98363		30.7	-3.95811		30.6624	-4.61827		30.6539	-4.76948		30.6771	-4.1696
	30.7817	-5.08125		30.7623	-3.5045		30.9291	-5.00798		30.876	-4.11475		30.8382	-4.64621		30.83	-4.79264		30.853	-4.18614
	30.9575	-5.08643		30.9383	-3.52622		31.1051	-5.00918		31.0521	-4.00344		31.0141	-4.65472		31.0061	-4.82994		31.0289	-4.18193
	31.1332	-5.11205		31.1142	-3.57711		31.281	-5.06298		31.2281	-4.02411		31.1899	-4.6579		31.1822	-4.85799		31.2048	-4.20943
	31.309	-5.14193		31.2901	-3.60592		31.457	-5.06801		31.4042	-4.02334		31.3657	-4.67647		31.3582	-4.88739		31.3807	-4.30102
	31.4848	-5.14919		31.466	-3.63232		31.633	-5.09575		31.5802	-4.18118		31.5415	-4.71761		31.5343	-4.91418		31.5566	-4.5038
	31.6606	-5.16058		31.642	-3.66797		31.809	-5.12996		31.7562	-4.07057		31.7173	-4.75241		31.7103	-4.93034		31.7325	-4.63932
	31.8364	-5.18959		31.8179	-3.67323		31.985	-5.16323		31.9323	-4.11742		31.8932	-4.77846		31.8864	-4.95206		31.9084	-4.70621
	32.0121	-5.2173		31.9938	-3.69388		32.1609	-5.20854		32.1083	-4.21274		32.069	-4.77869		32.0625	-4.96898		32.0843	-4.77138
	32.1879	-5.24578		32.1698	-3.7345		32.3369	-5.2226		32.2843	-4.15351		32.2448	-4.79794		32.2385	-4.99724		32.2602	-4.77721
	32.3637	-5.26315		32.3457	-3.75703		32.5129	-5.2303		32.4604	-4.34856		32.4206	-4.84194		32.4146	-5.01763		32.4361	-4.73303
	32.5395	-5.29409		32.5216	-3.77571		32.6889	-5.26123		32.6364	-4.20722		32.5964	-4.8793		32.5907	-5.0519		32.6121	-4.61746
	32.7153	-5.32108		32.6975	-3.80896		32.8648	-5.28903		32.8124	-4.33461		32.7722	-4.85991		32.7667	-5.07853		32.788	-4.53054
	32.8911	-5.34219		32.8735	-3.82535		33.0408	-5.29416		32.9885	-4.31063		32.9481	-4.89352		32.9428	-5.1035		32.9639	-4.50973
	33.0669	-5.37489		33.0494	-3.84372		33.2168	-5.31945		33.1645	-4.35463		33.1239	-4.91661		33.1189	-5.12834		33.1398	-4.46785
	33.2426	-5.38423		33.2253	-3.87234		33.3928	-5.36767		33.3406	-4.52957		33.2997	-4.92711		33.2949	-5.1385		33.3157	-4.44158
	33.4184	-5.38893		33.4013	-3.88438		33.5688	-5.37184		33.5166	-4.50708		33.4755	-4.94135		33.471	-5.17289		33.4916	-4.5088
	33.5942	-5.41285		33.5772	-3.92291		33.7447	-5.39483		33.6926	-4.49251		33.6513	-4.96691		33.6471	-5.19478		33.6675	-4.57668
	33.77	-5.43949		33.7531	-3.96357		33.9207	-5.41583		33.8687	-4.42827		33.8272	-5.00839		33.8231	-5.22118		33.8434	-4.64867
	33.9458	-5.46471		33.929	-3.98445		34.0967	-5.44957		34.0447	-4.41804		34.003	-5.03546		33.9992	-5.25529		34.0193	-4.68287
	34.1215	-5.46955		34.105	-4.01017		34.2727	-5.46659		34.2208	-4.46458		34.1788	-5.0523		34.1752	-5.29216		34.1952	-4.70772
	34.2973	-5.49546		34.2809	-4.02377		34.4486	-5.4856		34.3968	-4.49686		34.3546	-5.07546		34.3513	-5.31686		34.3711	-4.72604
	34.4731	-5.53888		34.4568	-4.01736		34.6246	-5.52862		34.5728	-4.54461		34.5304	-5.09486		34.5274	-5.31297		34.547	-4.71802
	34.6489	-5.5773		34.6328	-4.03737		34.8006	-5.54713		34.7489	-4.45616		34.7062	-5.11435		34.7034	-5.34814		34.7229	-4.75032
	34.8247	-5.60889		34.8087	-4.09849		34.9766	-5.56954		34.9249	-4.46937		34.8821	-5.1353		34.8795	-5.36837		34.8988	-4.77135
	35.0005	-5.61421		34.9846	-4.14705		35.1525	-5.58907		35.1009	-4.55703		35.0579	-5.15481		35.0556	-5.40512		35.0747	-4.78633
	35.1762	-5.64409		35.1606	-4.1538		35.3285	-5.62514		35.277	-4.58897		35.2337	-5.18345		35.2316	-5.43709		35.2506	-4.79386
	35.352	-5.67723		35.3365	-4.15548		35.5045	-5.65653		35.453	-4.64505		35.4095	-5.2164		35.4077	-5.46151		35.4265	-4.85265
	35.5278	-5.70486		35.5124	-4.15491		35.6805	-5.66918		35.629	-4.63497		35.5853	-5.23437		35.5838	-5.49029		35.6024	-4.87647
	35.7036	-5.72981		35.6883	-4.18565		35.8565	-5.69161		35.8051	-4.70538		35.7612	-5.24602		35.7598	-5.50519		35.7783	-4.89076
	35.8794	-5.77194		35.8643	-4.22294		36.0324	-5.74545		35.9811	-4.55443		35.937	-5.27272		35.9359	-5.5282		35.9542	-4.91749
	36.0551	-5.76824		36.0402	-4.26476		36.2084	-5.75694		36.1572	-4.51572		36.1128	-5.30802		36.112	-5.55166		36.1301	-4.93276
	36.2309	-5.80171		36.2161	-4.2923		36.3844	-5.80597		36.3332	-4.76589		36.2886	-5.35256		36.288	-5.59882		36.306	-5.00051
	36.4067	-5.82698		36.3921	-4.30053		36.5604	-5.80679		36.5092	-4.87906		36.4644	-5.36988		36.4641	-5.62812		36.4819	-5.0394
	36.5825	-5.85625		36.568	-4.30227		36.7364	-5.85541		36.6853	-4.85527		36.6403	-5.37998		36.6402	-5.65069		36.6578	-5.00165
	36.7583	-5.88578		36.7439	-4.33916		36.9123	-5.85703		36.8613	-4.90602		36.8161	-5.40839		36.8162	-5.67248		36.8338	-5.0565
	36.9341	-5.91923		36.9198	-4.38652		37.0883	-5.88011		37.0373	-4.89498		36.9919	-5.45068		36.9923	-5.69052		37.0097	-5.05372
	37.1098	-5.93896		37.0958	-4.39819		37.2643	-5.92357		37.2134	-4.88459		37.1677	-5.47981		37.1684	-5.72709		37.1855	-5.10591
	37.2856	-5.95715		37.2717	-4.41781		37.4403	-5.9614		37.3894	-4.65437		37.3435	-5.47736		37.3444	-5.75154		37.3615	-5.14764
	37.4614	-5.98643		37.4476	-4.43561		37.6162	-5.98056		37.5654	-4.76428		37.5194	-5.49496		37.5205	-5.78834		37.5374	-5.15659
	37.6372	-6.00234		37.6236	-4.44355		37.7922	-5.99934		37.7415	-4.78023		37.6952	-5.53582		37.6966	-5.83179		37.7133	-5.18288
	37.813	-6.01771		37.7995	-4.48733		37.9682	-6.00764		37.9175	-5.06713		37.871	-5.57579		37.8726	-5.84722		37.8892	-5.2242
	37.9888	-6.03068		37.9754	-4.51797		38.1442	-6.04128		38.0936	-5.30917		38.0468	-5.58671		38.0487	-5.87689		38.0651	-5.28879
	38.1645	-6.07802		38.1514	-4.56201		38.3201	-6.08518		38.2696	-5.13846		38.2226	-5.60061		38.2248	-5.90502		38.241	-5.29159
	38.3403	-6.11196		38.3273	-4.56863		38.4961	-6.09776		38.4456	-4.98585		38.3984	-5.63827		38.4008	-5.94779		38.4169	-5.29902
	38.5161	-6.1359		38.5032	-4.5804		38.6721	-6.1457		38.6217	-5.02619		38.5743	-5.66289		38.5769	-5.93307		38.5928	-5.33098
	38.6919	-6.15438		38.6791	-4.58496		38.8481	-6.14373		38.7977	-5.09474		38.7501	-5.68482		38.7529	-5.95446		38.7687	-5.34161
	38.8677	-6.17157		38.8551	-4.60988		39.0241	-6.1277		38.9737	-5.11917		38.9259	-5.62502		38.929	-5.98097		38.9446	-5.35467
	39.0434	-6.22206		39.031	-4.65725		39.2	-6.16721		39.1498	-5.19973		39.1017	-5.68298		39.1051	-6.02268		39.1205	-5.40514
	39.2192	-6.26286		39.2069	-4.70751		39.376	-6.1967		39.3258	-5.21574		39.2775	-5.7591		39.2811	-6.10218		39.2964	-5.453
	39.395	-6.27803		39.3829	-4.71903		39.552	-6.25913		39.5018	-5.25953		39.4534	-5.79547		39.4572	-6.07335		39.4723	-5.4946
	39.5708	-6.29719		39.5588	-4.72359		39.728	-6.32672		39.6779	-5.29349		39.6292	-5.82554		39.6333	-6.08454		39.6482	-5.46146
	39.7466	-6.3344		39.7347	-4.74585		39.904	-6.29904		39.8539	-5.31958		39.805	-5.83992		39.8093	-6.1392		39.8241	-5.47686
	39.9224	-6.35129		39.9106	-4.76945		40.0799	-6.28401		40.03	-5.30531		39.9808	-5.86516		39.9854	-6.1689		40	-5.50155
	40.0981	-6.37758		40.0866	-4.79907		40.2559	-6.3517		40.206	-5.24708		40.1566	-5.91024		40.1615	-6.20437		40.1759	-5.57341
	40.2739	-6.39782		40.2625	-4.8286		40.4319	-6.38347		40.382	-5.28408		40.3324	-5.92423		40.3375	-6.22959		40.3518	-5.61025
	40.4497	-6.43258		40.4384	-4.85356		40.6079	-6.40797		40.5581	-5.44422		40.5083	-5.95626		40.5136	-6.24359		40.5277	-5.6029
	40.6255	-6.45738		40.6144	-4.87036		40.7839	-6.41318		40.7341	-5.52587		40.6841	-5.97134		40.6897	-6.28408		40.7036	-5.59658
	40.8013	-6.48381		40.7903	-4.89262		40.9598	-6.44471		40.9101	-5.46573		40.8599	-5.99932		40.8657	-6.32249		40.8795	-5.66245
	40.977	-6.52092		40.9662	-4.90312		41.1358	-6.46293		41.0862	-5.42502		41.0357	-6.00673		41.0418	-6.33572		41.0554	-5.73691
	41.1528	-6.54762		41.1422	-4.91374		41.3118	-6.49309		41.2622	-5.46169		41.2115	-6.02991		41.2179	-6.36866		41.2313	-5.73586
	41.3286	-6.57579		41.3181	-4.94414		41.4878	-6.53203		41.4382	-5.51347		41.3873	-6.05224		41.3939	-6.40011		41.4072	-5.76433
	41.5044	-6.5906		41.494	-4.98841		41.6637	-6.54364		41.6143	-5.61421		41.5632	-6.06133		41.57	-6.42185		41.5831	-5.75969
	41.6802	-6.60979		41.67	-5.01979		41.8397	-6.57785		41.7903	-5.51344		41.739	-6.09654		41.746	-6.465		41.7591	-5.77766
	41.856	-6.63997		41.8459	-5.03212		42.0157	-6.60015		41.9664	-5.51475		41.9148	-6.14755		41.9221	-6.50828		41.935	-5.82299
	42.0318	-6.67727		42.0218	-5.05183		42.1917	-6.60076		42.1424	-5.64179		42.0906	-6.17008		42.0982	-6.54242		42.1109	-5.88653
	42.2075	-6.69436		42.1977	-5.06545		42.3676	-6.6539		42.3184	-5.49601		42.2664	-6.18688		42.2743	-6.5678		42.2868	-5.91136
	42.3833	-6.72465		42.3737	-5.08655		42.5436	-6.69626		42.4945	-5.34853		42.4423	-6.21593		42.4503	-6.60557		42.4627	-5.99548
	42.5591	-6.74022		42.5496	-5.10137		42.7196	-6.70645		42.6705	-5.62268		42.6181	-6.22582		42.6264	-6.61565		42.6386	-5.99804
	42.7349	-6.76718		42.7255	-5.15078		42.8956	-6.73258		42.8465	-5.7554		42.7939	-6.25404		42.8024	-6.62763		42.8145	-5.96003
	42.9107	-6.79266		42.9014	-5.18782		43.0716	-6.76401		43.0226	-5.72751		42.9697	-6.27739		42.9785	-6.67293		42.9904	-5.94108
	43.0864	-6.81977		43.0774	-5.22143		43.2475	-6.76159		43.1986	-5.36335		43.1455	-6.30135		43.1546	-6.70248		43.1663	-6.01136
	43.2622	-6.84653		43.2533	-5.23188		43.4235	-6.77323		43.3747	-5.04363		43.3214	-6.31867		43.3306	-6.73362		43.3422	-6.10067
	43.438	-6.87589		43.4292	-5.25242		43.5995	-6.82773		43.5507	-6.01132		43.4972	-6.34896		43.5067	-6.7535		43.5181	-6.13459
	43.6138	-6.91509		43.6052	-5.27125		43.7755	-6.8737		43.7267	-5.83879		43.673	-6.38564		43.6828	-6.77649		43.694	-6.10811
	43.7896	-6.94873		43.7811	-5.30594		43.9515	-6.91689		43.9028	-5.60451		43.8488	-6.40212		43.8588	-6.8072		43.8699	-6.11472
	43.9654	-6.96062		43.957	-5.36297		44.1274	-6.93158		44.0788	-5.84696		44.0246	-6.42569		44.0349	-6.82936		44.0458	-6.19028
	44.1411	-6.96383		44.133	-5.36126		44.3034	-6.92896		44.2548	-5.69128		44.2004	-6.45526		44.211	-6.89127		44.2217	-6.24012
	44.3169	-6.99697		44.3089	-5.38301		44.4794	-6.92884		44.4309	-5.43801		44.3763	-6.48748		44.387	-6.91898		44.3976	-6.24876
	44.4927	-7.03262		44.4848	-5.40333		44.6554	-6.95519		44.6069	-5.69582		44.5521	-6.5145		44.5631	-6.94155		44.5735	-6.24146
	44.6685	-7.05943		44.6608	-5.46222		44.8313	-7.00463		44.7829	-5.54653		44.7279	-6.53322		44.7392	-7.01797		44.7494	-6.2535
	44.8443	-7.08708		44.8367	-5.49066		45.0073	-7.03119		44.959	-5.93198		44.9037	-6.56852		44.9152	-7.00789		44.9253	-6.31051
	45.02	-7.12152		45.0126	-5.51851		45.1833	-7.04373		45.135	-6.26401		45.0795	-6.59289		45.0913	-7.04454		45.1012	-6.33545
	45.1958	-7.14366		45.1885	-5.53263		45.3593	-7.06916		45.3111	-5.9329		45.2553	-6.61904		45.2674	-7.07053		45.2771	-6.42051
	45.3716	-7.15944		45.3645	-5.57006		45.5352	-7.0677		45.4871	-5.65519		45.4312	-6.6348		45.4434	-7.12298		45.453	-6.35467
	45.5474	-7.17813		45.5404	-5.62754		45.7112	-7.10528		45.6631	-5.38801		45.607	-6.65377		45.6195	-7.17539		45.6289	-6.44397
	45.7232	-7.21404		45.7163	-5.66624		45.8872	-7.14779		45.8392	-6.11754		45.7828	-6.69869		45.7955	-7.21066		45.8048	-6.42339
	45.899	-7.25602		45.8922	-5.69		46.0632	-7.19348		46.0152	-6.07331		45.9586	-6.7262		45.9716	-7.20574		45.9807	-6.47865
	46.0747	-7.2655		46.0682	-5.69265		46.2392	-7.22089		46.1912	-5.66823		46.1345	-6.76072		46.1477	-7.22309		46.1566	-6.53284
	46.2505	-7.32099		46.2441	-5.75069		46.4151	-7.22239		46.3673	-5.67335		46.3103	-6.76392		46.3237	-7.27483		46.3325	-6.50217
	46.4263	-7.327		46.42	-5.80285		46.5911	-7.26214		46.5433	-5.75865		46.4861	-6.80844		46.4998	-7.30742		46.5085	-6.53295
[truncated: 21 more rows]

## Sheet: Supplementary Figure 3
Supplementary Figure 3a					Supplementary Figure 3b					Supplementary Figure 3c					Supplementary Figure 3d					Supplementary Figure 3e
[truncated: 87 more rows]

[truncated: 6 more sheets: Supplementary Figure 4, Supplementary Figure 5, Supplementary Figure 7, Supplementary Figure 8, Supplementary Figure 9, Supplementary Table 1]
